# Supplementary material
Source: publisher site journal article supplement (https://www.dovepress.com/article/597468)
Supplement: Supplementary file 1 [file Supplementary%20Material_1.pdf]

# Supplementary Material

## Global disability and economic burden caused by rheumatoid arthritis, osteoarthritis, neck pain, and low back pain in women of childbearing age from 1990 to 2021

Yuming Yao<sup>1#</sup>; Dongliang Yuan<sup>1#</sup>; Yusheng Li<sup>1,2</sup>; Yaping Wang<sup>2,3\*</sup>

1.Department of Orthopedics, Xiangya Hospital, Central South University, Changsha, Hunan, China

2.National Clinical Research Center for Geriatric Disorders, Xiangya Hospital, Central South University, Changsha, Hunan, China

3.Teaching and Research Section of Clinical Nursing, Xiangya Hospital of Central South University, Changsha, Hunan, China

# Contributed equally.

\*Corresponding authors:

Yaping Wang, E-mail: wangyaping@csu.edu.cn.

## CONTENT

|                                                                                                                                                                                                                                                                                         |     |
|-----------------------------------------------------------------------------------------------------------------------------------------------------------------------------------------------------------------------------------------------------------------------------------------|-----|
| Supplementary Methods.....                                                                                                                                                                                                                                                              | 1   |
| Figure S1. Changes in age-standardized years lived with disability for women of reproductive age globally and in five SDI quintile regions from 1990 to 2021, caused by rheumatoid arthritis (A), osteoarthritis (B), neck pain (C), and low back pain (D).....                         | 17  |
| Figure S2. Trends in age-standardized YLDs rates due to rheumatoid arthritis (A), osteoarthritis (B), neck pain (C), and low back pain (D) among women of reproductive age across 204 countries or regions from 1990 to 2021, as a function of the SDI.....                             | 21  |
| Table S1. In 2021, years lived with disability for women of reproductive age globally, categorized by SDI and region, caused by rheumatoid arthritis, osteoarthritis, neck pain, and low back pain, along with the percentage change from 1990 to 2021.....                             | 25  |
| Table S2. In 2021, age-standardized years lived with disability rate for women of reproductive age globally, categorized by SDI and region, caused by rheumatoid arthritis, osteoarthritis, neck pain, and low back pain, along with the percentage change from 1990 to 2021.....       | 28  |
| Table S3. In 2021, years lived with disability for women of reproductive age in 204 countries or territories, caused by rheumatoid arthritis, osteoarthritis, neck pain, and low back pain, along with estimated annual percentage changes from 1990 to 2021.....                       | 31  |
| Table S4. In 2021, age-standardized years lived with disability rate for women of reproductive age in 204 countries or territories, caused by rheumatoid arthritis, osteoarthritis, neck pain, and low back pain, along with estimated annual percentage changes from 1990 to 2021..... | 46  |
| Table S5. The proportion of years lived with disability from four common musculoskeletal diseases in women of reproductive age across different age groups globally in 1990 and 2021.....                                                                                               | 61  |
| Table S6. The effective disparities between disability levels and frontier levels for women of reproductive age due to rheumatoid arthritis, osteoarthritis, neck pain, and low back pain in 204 countries or territories from 1990 to 2021.....                                        | 62  |
| Table S7. Total healthcare expenditure for women of reproductive age in all age groups due to rheumatoid arthritis globally and across regions in 2021.....                                                                                                                             | 70  |
| Table S8. Total healthcare expenditure for women of reproductive age in all age groups due to osteoarthritis globally and across regions in 2021.....                                                                                                                                   | 74  |
| Table S9. Total healthcare expenditure for women of reproductive age in all age groups due to neck pain globally and across regions in 2021.....                                                                                                                                        | 78  |
| Table S10. Total healthcare expenditure for women of reproductive age in all age groups due to low back pain globally and across regions in 2021.....                                                                                                                                   | 82  |
| Table S11. Total healthcare expenditure for women of reproductive age in all age groups due to rheumatoid arthritis in 204 countries or territories in 2021.....                                                                                                                        | 86  |
| Table S12. Total healthcare expenditure for women of reproductive age in all age groups due to osteoarthritis in 204 countries or territories in 2021.....                                                                                                                              | 104 |
| Table S13. Total healthcare expenditure for women of reproductive age in all age groups due to neck pain in 204 countries or territories in 2021.....                                                                                                                                   | 120 |
| Table S14. Total healthcare expenditure for women of reproductive age in all age groups due to low back pain in 204 countries or territories in 2021.....                                                                                                                               | 139 |

## Supplementary Methods

### 1.Data Download

**Website:** <https://vizhub.healthdata.org/gbd-results/>

**GBD Estimate:** Cause of death or injury

**Measure:** YLDs, Prevalence

**Metric:** Number, Rate

**Cause:** Rheumatoid arthritis; Osteoarthritis; Neck pain; Low back pain;

**Location:**

Global

Low SDI

Low-middle SDI

Middle SDI

High-middle SDI

High SDI

**Central Europe, Eastern Europe, and Central Asia**

**Central Asia**

Armenia

Azerbaijan

Georgia

Kazakhstan

Kyrgyzstan

Mongolia

Tajikistan

Turkmenistan

Uzbekistan

**Central Europe**

Albania  
Bosnia and Herzegovina  
Bulgaria  
Croatia  
Czech Republic  
Hungary  
Montenegro  
North Macedonia  
Poland  
Romania  
Serbia  
Slovakia  
Slovenia

**Eastern Europe**

Belarus  
Estonia  
Latvia  
Lithuania  
Moldova  
Russia  
Ukraine

**High income**

**Australasia**

Australia  
New Zealand

**High-income Asia Pacific**

Brunei Darussalam

Japan

South Korea

Singapore

**High-income North America**

Canada

Greenland

United States of America

**Southern Latin America**

Argentina

Chile

Uruguay

**Western Europe**

Andorra

Austria

Belgium

Cyprus

Denmark

Finland

France

Germany

Greece

Iceland

Ireland

Israel

Italy

Luxembourg  
Malta  
Monaco  
Netherlands  
Norway  
Portugal  
San Marino  
Spain  
Sweden  
Switzerland  
United Kingdom

**Latin America and Caribbean**

**Caribbean**

Antigua and Barbuda  
Bahamas  
Barbados  
Belize  
Bermuda  
Cuba  
Dominica  
Dominican Republic  
Grenada  
Guyana  
Haiti  
Jamaica  
Puerto Rico

Saint Kitts and Nevis

Saint Lucia

Saint Vincent and the Grenadines

Suriname

Trinidad and Tobago

United States Virgin Islands

**Central Latin America**

Colombia

Costa Rica

El Salvador

Guatemala

Honduras

Mexico

Nicaragua

Panama

Venezuela (Bolivarian Republic of)

**Tropical Latin America**

Brazil

Paraguay

**Andean Latin America**

Bolivia (Plurinational State of)

Ecuador

Peru

**North Africa and Middle East**

**North Africa and Middle East**

Afghanistan

Algeria  
Bahrain  
Egypt  
Iran  
Iraq  
Jordan  
Kuwait  
Lebanon  
Libya  
Morocco  
Oman  
Palestine  
Qatar  
Saudi Arabia  
Sudan  
Syria  
Tunisia  
Turkey  
United Arab Emirates  
Yemen

**South Asia**

**South Asia**

Bangladesh  
Bhutan  
India  
Nepal

Pakistan

**Southeast Asia, East Asia, and Oceania**

**East Asia**

China

North Korea

Taiwan (Province of China)

**Oceania**

American Samoa

Cook Islands

Fiji

Guam

Kiribati

Marshall Islands

Micronesia

Nauru

New Caledonia

Niue

Northern Mariana Islands

Palau

Papua New Guinea

Samoa

Solomon Islands

Tonga

Tuvalu

Vanuatu

**Southeast Asia**

Cambodia  
Indonesia  
Laos  
Malaysia  
Maldives  
Mauritius  
Myanmar  
Philippines  
Seychelles  
Sri Lanka  
Thailand  
Timor-Leste  
Vietnam

**Sub-Saharan Africa**

**Central Sub-Saharan Africa**

Angola  
Central African Republic  
Congo  
Democratic Republic of the Congo  
Equatorial Guinea  
Gabon

**Eastern Sub-Saharan Africa**

Burundi  
Comoros  
Djibouti  
Eritrea

Ethiopia  
Kenya  
Madagascar  
Malawi  
Mozambique  
Rwanda  
Somalia  
South Sudan  
Uganda  
Tanzania  
Zambia

**Southern Sub-Saharan Africa**

Botswana  
Eswatini  
Lesotho  
Namibia  
South Africa  
Zimbabwe

**Western Sub-Saharan Africa**

Benin  
Burkina Faso  
Cabo Verde  
Cameroon  
Chad  
Côte d'Ivoire  
Gambia

Ghana  
 Guinea  
 Guinea-Bissau  
 Liberia  
 Mali  
 Mauritania  
 Niger  
 Nigeria  
 Sao Tome and Principe  
 Senegal  
 Sierra Leone  
 Togo

**Age:** 15-49 years; 15-19 years; 20-24 years; 25-29 years; 30-34 years; 35-39 years; 40-44 years; 45-49 years

**Sex:** Female

**Year:** 1990, 1991, 1992, 1993, 1994, 1995, 1996, 1997, 1998, 1999, 2000, 2001, 2002, 2003, 2004, 2005, 2006, 2007, 2008, 2009, 2010, 2011, 2012, 2013, 2014, 2015, 2016, 2017, 2018, 2019, 2020, 2021

**2.List of International Classification of Diseases**

| <b>Disease</b>            | <b>ICD10</b>           | <b>ICD9</b>            |
|---------------------------|------------------------|------------------------|
| Rheumatoid arthritis (RA) | M05–M06.9, M08.0–M08.8 | 714–714.3, 714.8–714.9 |
| Osteoarthritis (OA)       | M16, M17, M18, M19     | 715                    |
| Neck pain (NP)            | M54.2                  | 723.1                  |
| Low back pain (LBP)       | M54.3, M54.4, M54.5    | 724                    |

### 3. Terms and Definitions

**(1)RA:** The definition of RA is based on the 1987 classification criteria of the American College of Rheumatology, as referenced in the GBD study. At least four of the seven criteria must be met: morning stiffness (lasting at least 1 hour), arthritis in three or more joint areas (soft tissue swelling or joint cavity effusion), symmetrical arthritis, hand joint arthritis (involving the wrist, metacarpophalangeal joints, or proximal interphalangeal joints), rheumatoid nodules (subcutaneous or nodules on bony prominences), positive rheumatoid factor, and radiographic changes (X-rays showing hand or wrist joint erosions or osteoporosis), with the first four criteria needing to persist for at least 6 weeks<sup>3</sup>.

**(2)OA:** The definition of OA in the GBD study is symptomatic OA, which must be confirmed radiographically as Kellgren-Lawrence grade 2-4, with at least 1 month of pain in the past 12 months<sup>4,5</sup>.

**(3)NP:** The GBD 2021 study defines NP as pain in the neck lasting at least 1 day, with or without radiating pain to the upper limbs or extremities<sup>6</sup>.

**(4)LBP:** LBP is defined as back pain from the lower margin of the 12th rib to the lower gluteal fold, with or without unilateral or bilateral lower limb pain, and symptoms lasting at least 1 day<sup>7</sup>.

**(5)SDI:** The sociodemographic index (SDI) is a composite indicator used to measure the level of development of geographical regions, calculated based on three factors: total fertility rate for women under 25, average years of education for women aged 15 and above, and lag-adjusted per capita income distribution<sup>8,9</sup>. The SDI ranges from 0 to 1, with 0 indicating the lowest level of development and 1 representing the highest level of development. Based on the quintiles of SDI, the 204 countries and regions are divided into five groups: low SDI ( $\leq 0.454743$ ), low-middle SDI ( $0.454743-0.607679$ ), middle SDI ( $0.607679-0.689504$ ), high-middle SDI ( $0.689504-0.805129$ ), and high SDI ( $>0.805129$ )<sup>10</sup>.

### 4. Calculation of Estimated Annual Percentage Change (EAPC)

In this study, the Estimated Annual Percentage Change (EAPC) method was employed to quantify the long-term trends in age-standardized incidence rate, prevalence rate, and years lived with disability (YLD) rate of fractures among the global elderly population from 1990 to 2021. The EAPC was derived based on a log-linear regression model, which assumes a linear relationship between the natural logarithm of the indicator and time. Specifically, EAPC is calculated by fitting the natural logarithm of the rates to a regression model, where time serves as the independent variable. The natural logarithm of each observed value is fitted to a straight line, and the EAPC value is determined based on the slope of this line<sup>1</sup>. The equation is as follows:

$$\ln(y)=\alpha+\beta x+\varepsilon$$
$$\text{EAPC}=100\times[\exp(\beta)-1]$$

Where  $x$  represents the year,  $y$  is the natural logarithm of the rate (incidence rate, prevalence rate, or YLD rate),  $\alpha$  is the intercept,  $\beta$  is the slope, and  $\epsilon$  denotes the random error. The 95% confidence interval (CI) for EAPC is also derived from this fitted model. The interpretation of trend results is based on the 95% CI: if the lower bound of the 95% CI is greater than 0, it indicates an increasing trend; if the upper bound is less than 0, it suggests a decreasing trend. If the 95% CI contains 0, the trend change is not statistically significant <sup>2</sup>.

Additionally, this study employs percentage change to reflect the differences in prevalence, incidence, and disability-adjusted life years (DALYs) between 1990 and 2021. The formula is as follows:

$$\text{Percentage Change} = \frac{\text{Data in 2021} - \text{Data in 1990}}{\text{Data in 1990}}$$

All analyses were conducted using R software (version 4.4.0), and data visualization was performed with the ggplot2 package to ensure reproducibility and transparency of the results.

## 5. Frontier Analysis

This study employs frontier analysis to evaluate the optimal global disease burden boundaries under different socio-demographic development levels. First, age-standardized disease burden rate data were obtained from the Global Burden of Disease (GBD) database and matched with each country's Socio-demographic Index (SDI). The core of the analytical method involves constructing a data envelopment frontier through bootstrap sampling: for 1,000 resampled datasets generated with replacement, the Free Disposal Hull (FDH) method was used to evaluate and exclude super-efficient outliers—observations with significantly higher disease burdens than neighboring points at the same SDI level. For the retained valid observations, the achievable minimum disease burden values were dynamically calculated in ascending SDI order to establish the frontier boundary. Finally, local polynomial regression (LOESS) was applied to smooth the average frontier from the 1,000 bootstrap results (polynomial degree 1, span 0.2), forming a continuous nonlinear efficiency boundary curve. By integrating the rigorous boundary determination of FDH and the curve optimization of LOESS, this method quantitatively characterizes the potential optimal relationship between socio-demographic development and disease burden, providing a scientific basis for identifying performance improvement opportunities in health systems.

## 6. Calculation of Economic Burden

In assessing the economic burden, this study refers to and modifies the methods proposed in existing literature <sup>11-14</sup>. Specifically, we used extrapolation to estimate the

individual economic costs associated with four common musculoskeletal diseases (rheumatoid arthritis, osteoarthritis, neck pain, and low back pain) among women of reproductive age in different countries. In estimating the direct medical expenses per case in each country, we used an indirect estimation method: multiplying the medical expenses for each disease in women of reproductive age in the United States by the ratio of total healthcare expenditures in the target country to that in the United States. Due to objective limitations in data access, some data could not meet the requirement of being priced in the latest year's U.S. dollars. Therefore, we standardized the estimation and analysis using 2020 U.S. dollars adjusted for inflation as the benchmark.

| <b>Age group (years)</b>    | <b>2019 total health spending (million)</b> | <b>Annual percentage change (%)</b> | <b>2021 total health spending (million)</b> | <b>2021 prevalent case</b> | <b>2021 total health spending (per person)</b> |
|-----------------------------|---------------------------------------------|-------------------------------------|---------------------------------------------|----------------------------|------------------------------------------------|
| <b>Rheumatoid arthritis</b> |                                             |                                     |                                             |                            |                                                |
| 15-19                       | 60                                          | 3.21                                | 63.91                                       | 10,979.81                  | 5821.03                                        |
| 20-24                       | 130                                         | 3.87                                | 140.26                                      | 14,127.38                  | 9928.01                                        |
| 25-29                       | 190                                         | 4.51                                | 207.52                                      | 20,271.21                  | 10237.40                                       |
| 30-34                       | 290                                         | 4.43                                | 316.26                                      | 30,113.15                  | 10502.49                                       |
| 35-39                       | 430                                         | 4.21                                | 466.97                                      | 41,929.23                  | 11137.05                                       |
| 40-44                       | 550                                         | 2.46                                | 577.39                                      | 55,616.13                  | 10381.75                                       |
| 45-49                       | 830                                         | 1.93                                | 862.35                                      | 68,899.24                  | 12516.06                                       |
| <b>Osteoarthritis</b>       |                                             |                                     |                                             |                            |                                                |
| 15-19                       | 0                                           | 0                                   | 0.00                                        | 0                          | 0.00                                           |
| 20-24                       | 0                                           | 0                                   | 0.00                                        | 0                          | 0.00                                           |
| 25-29                       | 0                                           | 0                                   | 0.00                                        | 0                          | 0.00                                           |
| 30-34                       | 69                                          | 5.15                                | 76.29                                       | 50,168.79                  | 1520.67                                        |
| 35-39                       | 150                                         | 4.47                                | 163.71                                      | 289,497.68                 | 565.50                                         |
| 40-44                       | 360                                         | 2.21                                | 376.09                                      | 735,261.05                 | 511.50                                         |
| 45-49                       | 890                                         | 0.38                                | 896.78                                      | 1,350,580.82               | 663.99                                         |
| <b>Neck pain</b>            |                                             |                                     |                                             |                            |                                                |

|               |      |       |         |              |         |
|---------------|------|-------|---------|--------------|---------|
| 15-19         | 130  | -0.57 | 128.52  | 199,065.33   | 645.63  |
| 20-24         | 190  | 0.77  | 192.94  | 304,118.46   | 634.41  |
| 25-29         | 330  | 1.41  | 339.37  | 360,422.30   | 941.59  |
| 30-34         | 520  | 1.21  | 532.66  | 397,600.47   | 1339.69 |
| 35-39         | 760  | 0.74  | 771.29  | 435,250.89   | 1772.06 |
| 40-44         | 1000 | -1.13 | 977.53  | 482,856.27   | 2024.47 |
| 45-49         | 1200 | -1.78 | 1157.66 | 492,901.50   | 2348.66 |
| Low back pain |      |       |         |              |         |
| 15-19         | 300  | -0.42 | 297.49  | 756,427.73   | 393.28  |
| 20-24         | 380  | 0.48  | 383.66  | 924,394.59   | 415.04  |
| 25-29         | 640  | 1.35  | 657.40  | 1,236,186.20 | 531.79  |
| 30-34         | 980  | 1.17  | 1003.07 | 1,581,601.16 | 634.21  |
| 35-39         | 1300 | 0.78  | 1320.36 | 1,731,553.57 | 762.53  |
| 40-44         | 1600 | -1    | 1568.16 | 1,800,050.31 | 871.18  |
| 45-49         | 2000 | -1.67 | 1933.76 | 1,831,167.68 | 1056.02 |

The data used in this study on medical expenditures related to four common musculoskeletal diseases in U.S. women of reproductive age were sourced from <https://vizhub.healthdata.org/dex/>. For example, in 2019, the medical expenditures related to rheumatoid arthritis in the U.S. for different age groups were as follows: \$60 million for the 15-19 age group, \$130 million for the 20-24 age group, \$190 million for the 25-29 age group, \$290 million for the 30-34 age group, \$430 million for the 35-39 age group, \$550 million for the 40-44 age group, and \$830 million for the 45-49 age group (all in 2019 U.S. dollars). From 2010 to 2019, the annual growth rates of public health expenditures for each age group were 3.21%, 3.87%, 4.51%, 4.43%, 4.21%, 2.46%, and 1.93%, respectively. Based on these data, we further estimated the projected total medical expenditures related to rheumatoid arthritis in U.S. women of reproductive age for 2021. Through calculation, the projected expenditures for each age group were as follows: \$63.91 million, \$140.3 million, \$207.5 million, \$316.3 million, \$467 million, \$577.4 million, and \$862.3 million (all in 2021 U.S. dollars). Subsequently, we divided the 2021 rheumatoid arthritis expenditures for each age group by the corresponding number of prevalent cases in each group to calculate the medical expenditure per case. The results showed that the per capita expenditure for each age group was as follows: \$5,821.03, \$9,928.01, \$10,237.40, \$10,502.49, \$11,137.05, \$10,381.75, and

\$12,516.06 (all in 2021 U.S. dollars). The relevant calculations and data for other musculoskeletal diseases can be found in the table below. The medical expenditures for each of the four common musculoskeletal diseases in the U.S. in 2021 are represented by the variable "A".

Considering the differences in healthcare expenditures (i.e., healthcare levels) across countries, we adjusted the per capita costs for musculoskeletal diseases in various countries. Another study published in *The Lancet*<sup>15</sup> conducted a comprehensive assessment of the total healthcare expenditures related to diseases across 204 countries and regions from 1995 to 2050. In this study, the total healthcare expenditure of the United States is represented by "B," while the expenditures of the other 203 countries and territories are denoted by "Ci." From this, we can calculate the expenditure ratio (adjustment factor) reflecting the difference in healthcare expenditure levels between each country and the United States, denoted as "Ci/B." Based on this ratio, we derived the formula for calculating the healthcare expenditure related to each musculoskeletal disease in each country:  $HSp = A * (Ci/B)$ . Furthermore, as the number of women of childbearing age with musculoskeletal diseases in each country's age group is defined as "NPi," the healthcare expenditure for each of the four common musculoskeletal diseases in women of reproductive age in each country can be calculated using the formula  $(A * (Ci/B)) * NPi$ . Finally, by summing over the various intervals for the age range of 19 to 49 years, we calculate the final healthcare expenditure for a specific country (HS1). At the same time, we also calculated the total healthcare expenditure for the four common musculoskeletal diseases in women of reproductive age globally and across regions by aggregating the economic data from each country.

## References

1. Yang X, Chen H, Zhang T, et al. Global, regional, and national burden of blindness and vision loss due to common eye diseases along with its attributable risk factors from 1990 to 2019: a systematic analysis from the global burden of disease study 2019. *Aging (Albany NY)*. 13(15):19614-19642.
2. Zhang L, Tong Z, Han R, Li K, Zhang X, Yuan R. Spatiotemporal trends in global burden of rheumatic heart disease and associated risk factors from 1990 to 2019. *Int J Cardiol*. 384:100-106.
3. Arnett FC, Edworthy SM, Bloch DA, et al. The American Rheumatism Association 1987 revised criteria for the classification of rheumatoid arthritis. *Arthritis Rheum*. 1988;31(3):315-324.
4. Diseases GBD, Injuries C. Global incidence, prevalence, years lived with disability (YLDs), disability-adjusted life-years (DALYs), and healthy life expectancy (HALE) for 371 diseases and injuries in 204 countries and territories and 811 subnational locations, 1990-2021: a systematic analysis for the Global Burden of Disease Study 2021. *Lancet*. 2024;403(10440):2133-2161.
5. Kellgren JH, Lawrence JS. Radiological assessment of osteo-arthritis. *Ann Rheum Dis*. 1957;16(4):494-502.
6. Hoy D, March L, Woolf A, et al. The global burden of neck pain: estimates from the global burden of disease 2010 study. *Ann Rheum Dis*. 2014;73(7):1309-1315.

7. Hoy D, March L, Brooks P, et al. The global burden of low back pain: estimates from the Global Burden of Disease 2010 study. *Ann Rheum Dis.* 2014;73(6):968-974.
8. Collaborators GBDCoD. Global, regional, and national age-sex-specific mortality for 282 causes of death in 195 countries and territories, 1980-2017: a systematic analysis for the Global Burden of Disease Study 2017. *Lancet.* 2018;392(10159):1736-1788.
9. Collaborators GBDRF. Global, regional, and national comparative risk assessment of 84 behavioural, environmental and occupational, and metabolic risks or clusters of risks for 195 countries and territories, 1990-2017: a systematic analysis for the Global Burden of Disease Study 2017. *Lancet.* 2018;392(10159):1923-1994.
10. Wang F, Ma B, Ma Q, Liu X. Global, regional, and national burden of inguinal, femoral, and abdominal hernias: a systematic analysis of prevalence, incidence, deaths, and DALYs with projections to 2030. *Int J Surg.* 2024;110(4):1951-1967.
11. Ding D, Lawson KD, Kolbe-Alexander TL, et al. The economic burden of physical inactivity: a global analysis of major non-communicable diseases. *Lancet.* 388(10051):1311-1324.
12. Chen N, Fong DYT, Wong JYH. Health and Economic Outcomes Associated With Musculoskeletal Disorders Attributable to High Body Mass Index in 192 Countries and Territories in 2019. *JAMA Netw Open.* 6(1):e2250674.
13. Portnoy A, Clark RA, Quaife M, et al. The cost and cost-effectiveness of novel tuberculosis vaccines in low- and middle-income countries: A modeling study. *PLoS Med.* 20(1):e1004155.
14. Chen N, Fong DYT, Wong JYH. The global health and economic impact of low-back pain attributable to occupational ergonomic factors in the working-age population by age, sex, geography in 2019. *Scand J Work Environ Health.* 49(7):487-495.
15. Global Burden of Disease Health Financing Collaborator N. Tracking development assistance for health and for COVID-19: a review of development assistance, government, out-of-pocket, and other private spending on health for 204 countries and territories, 1990-2050. *Lancet.* 398(10308):1317-1343.

**Figure S1. Changes in age-standardized years lived with disability for women of reproductive age globally and in five SDI quintile regions from 1990 to 2021, caused by rheumatoid arthritis (A), osteoarthritis (B), neck pain (C), and low back pain (D)**

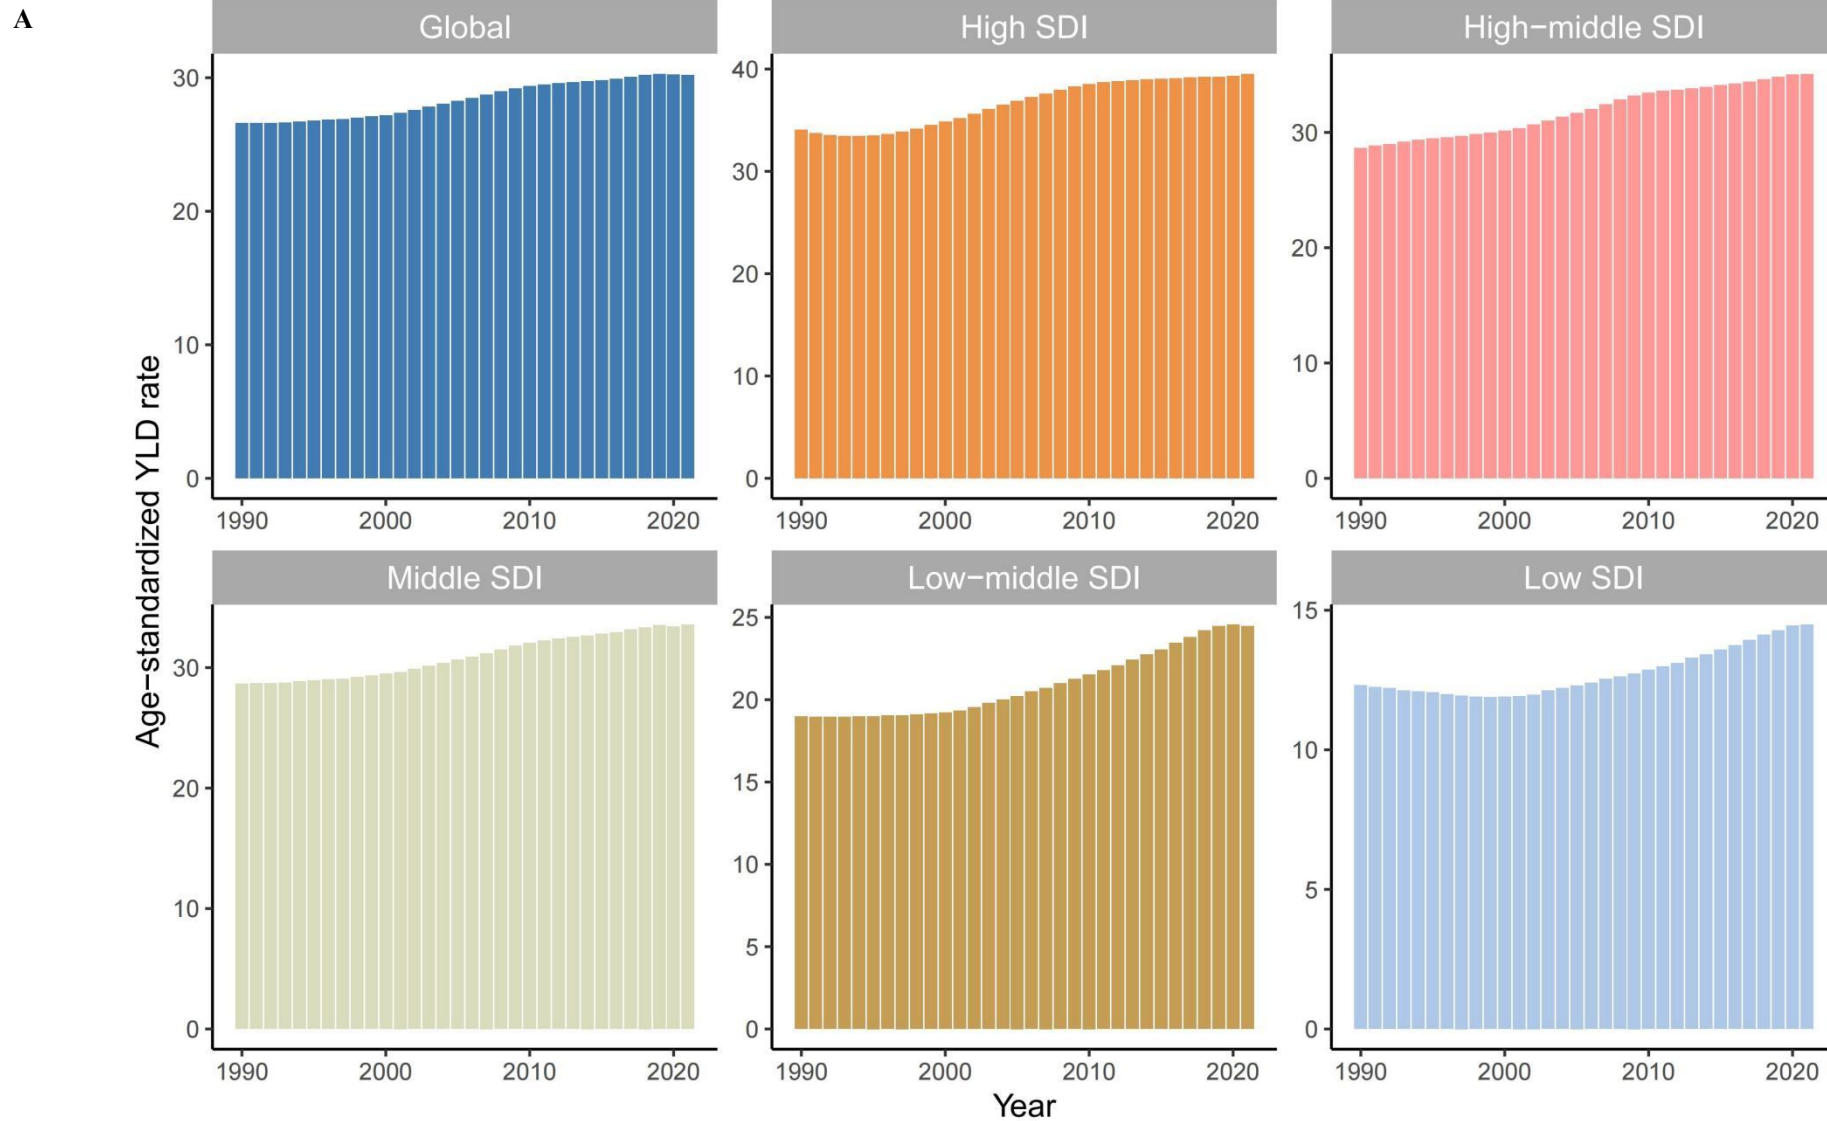

**B**

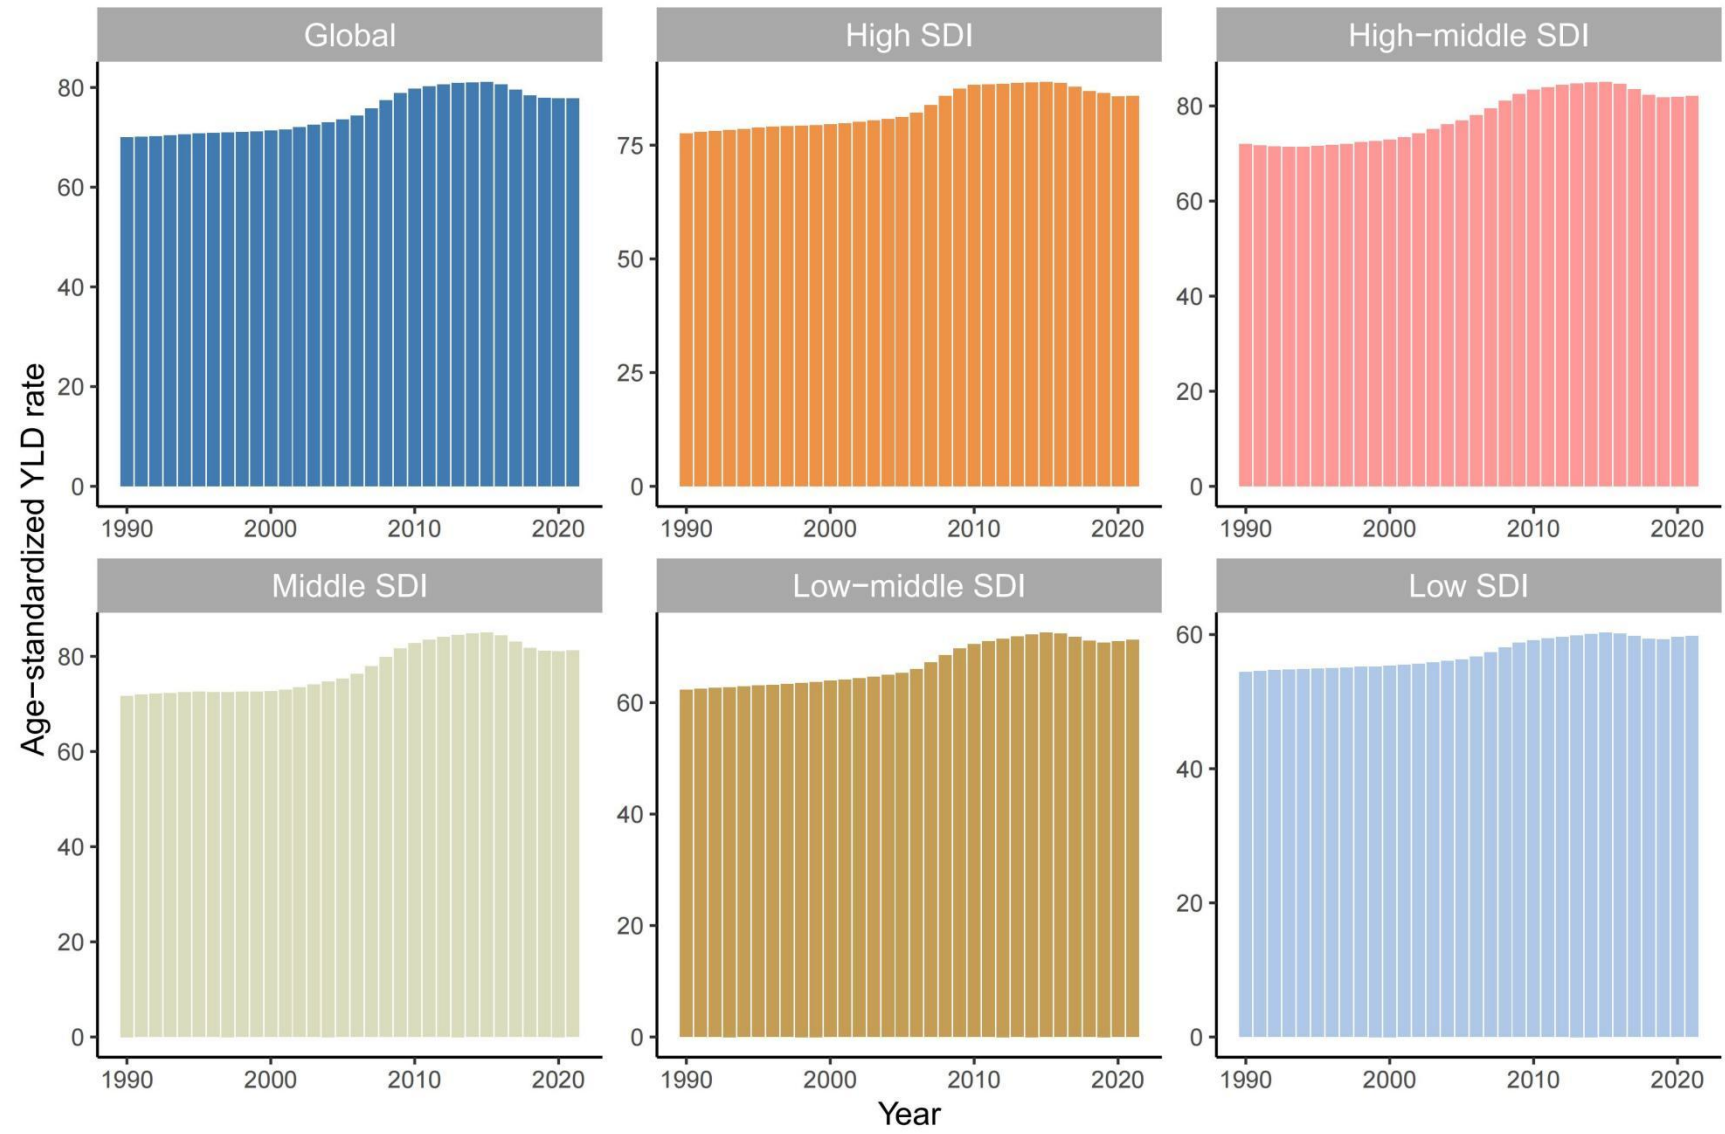

C

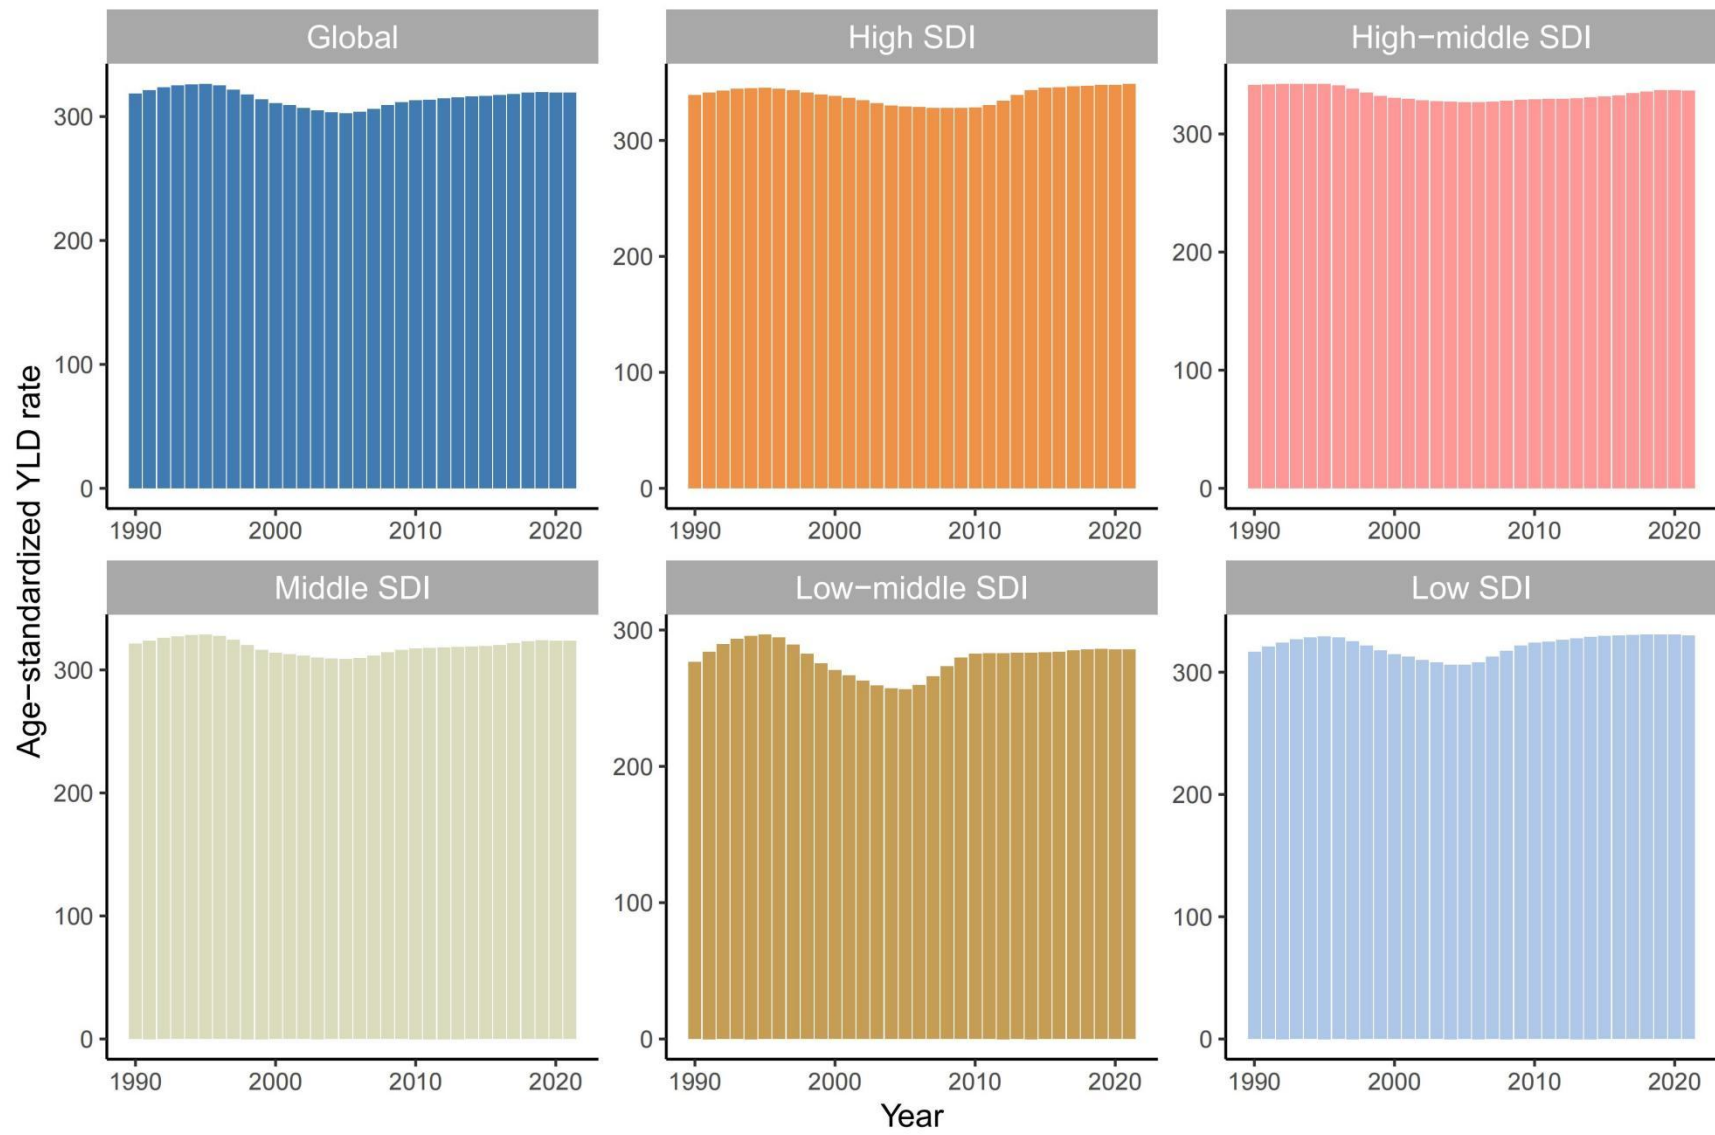

D

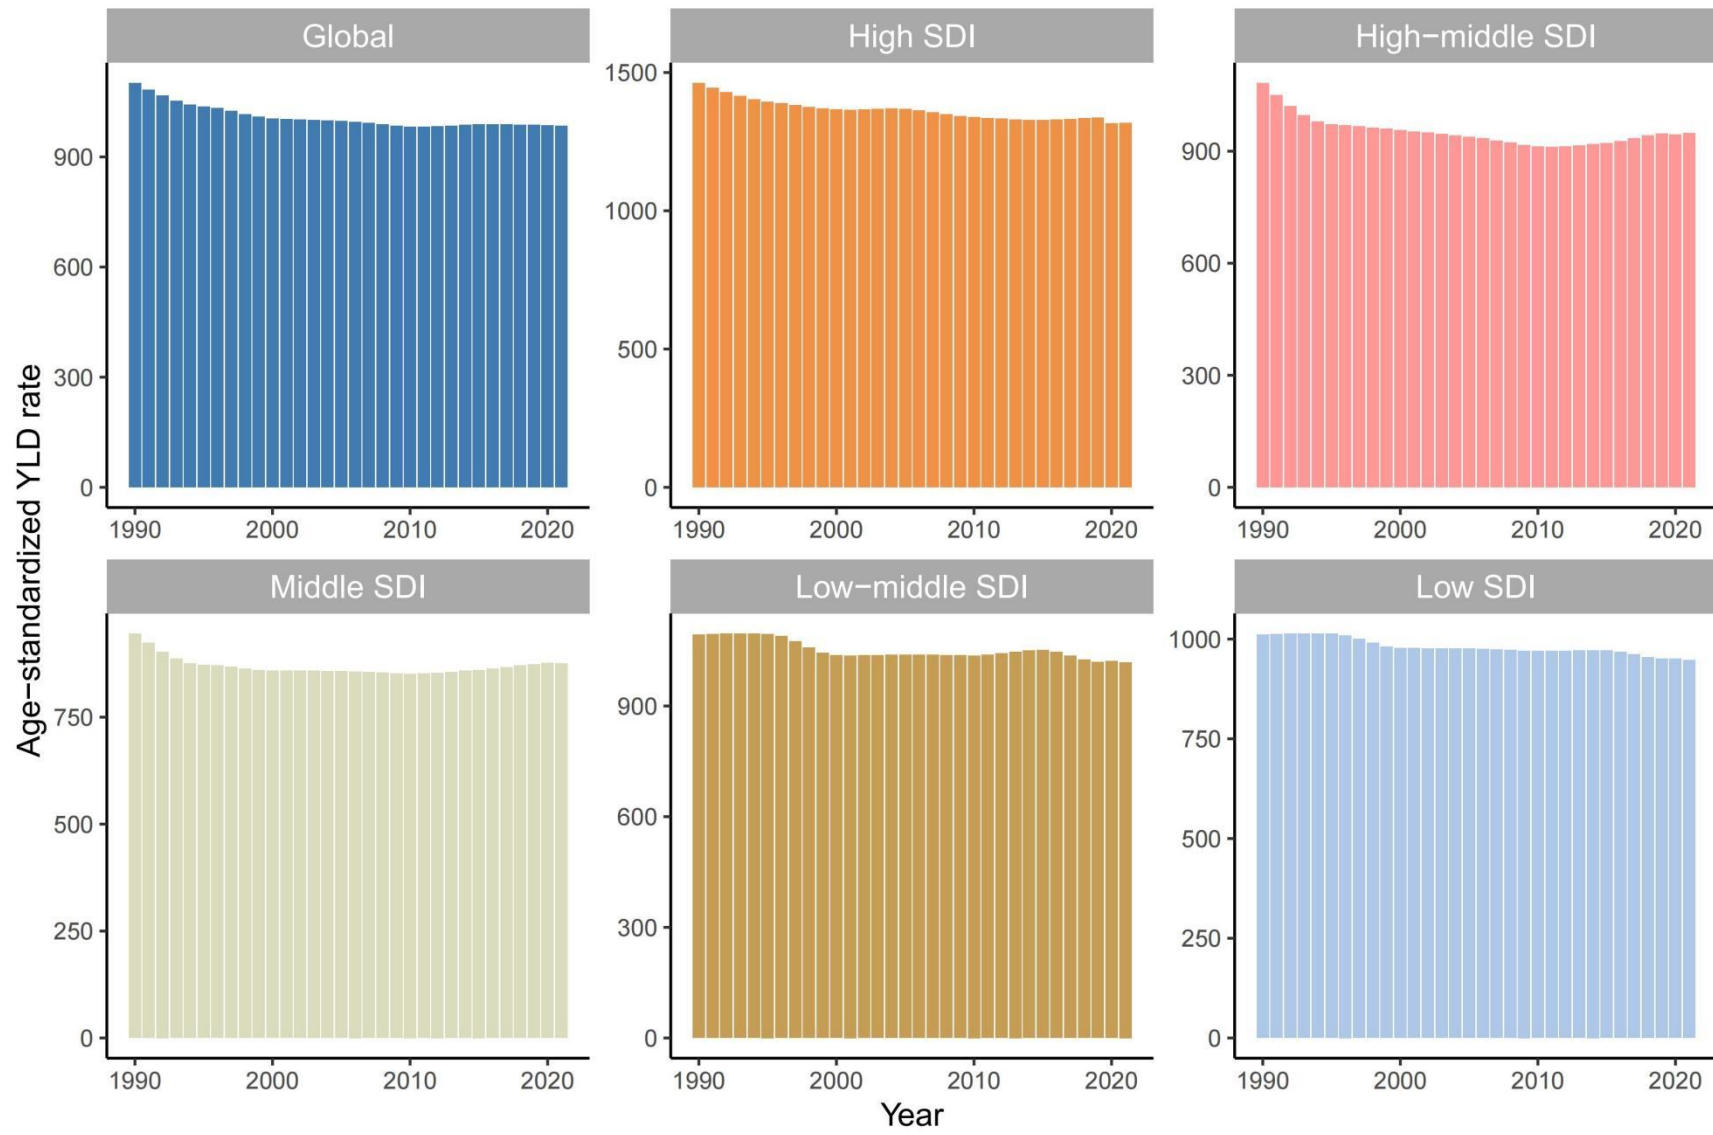

**Figure S2. Trends in age-standardized YLDs rates due to rheumatoid arthritis (A), osteoarthritis (B), neck pain (C), and low back pain (D) among women of reproductive age across 204 countries or regions from 1990 to 2021, as a function of the SDI**

The gradient in color represents the timeline, with lighter shades indicating 1990 and darker shades indicating 2021. YLDs, years lived with disability; SDI, sociodemographic index.

**(A) Rheumatoid arthritis**

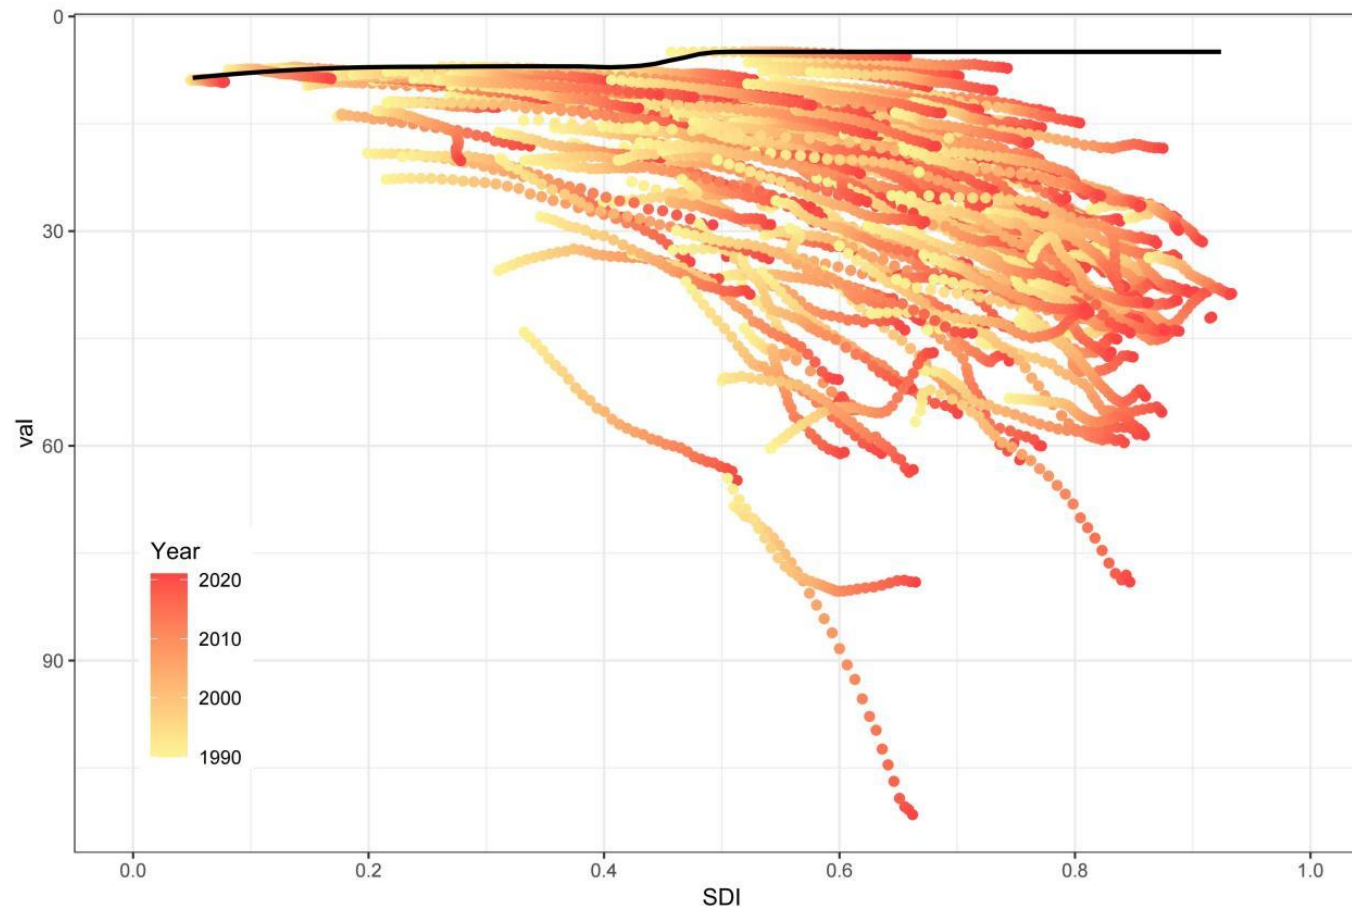

**(B) Osteoarthritis**

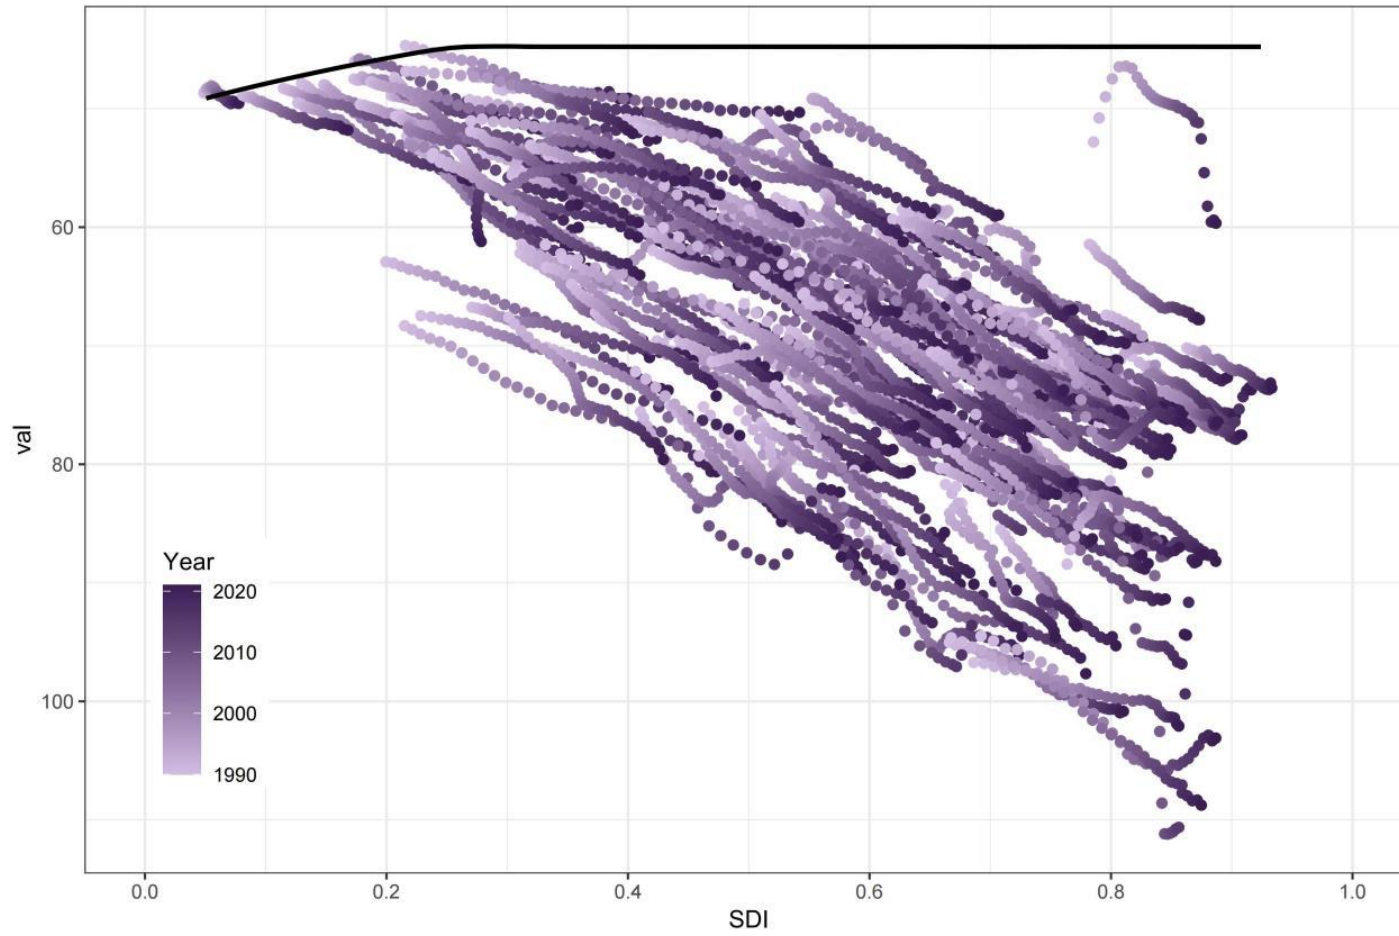

(C) Neck pain

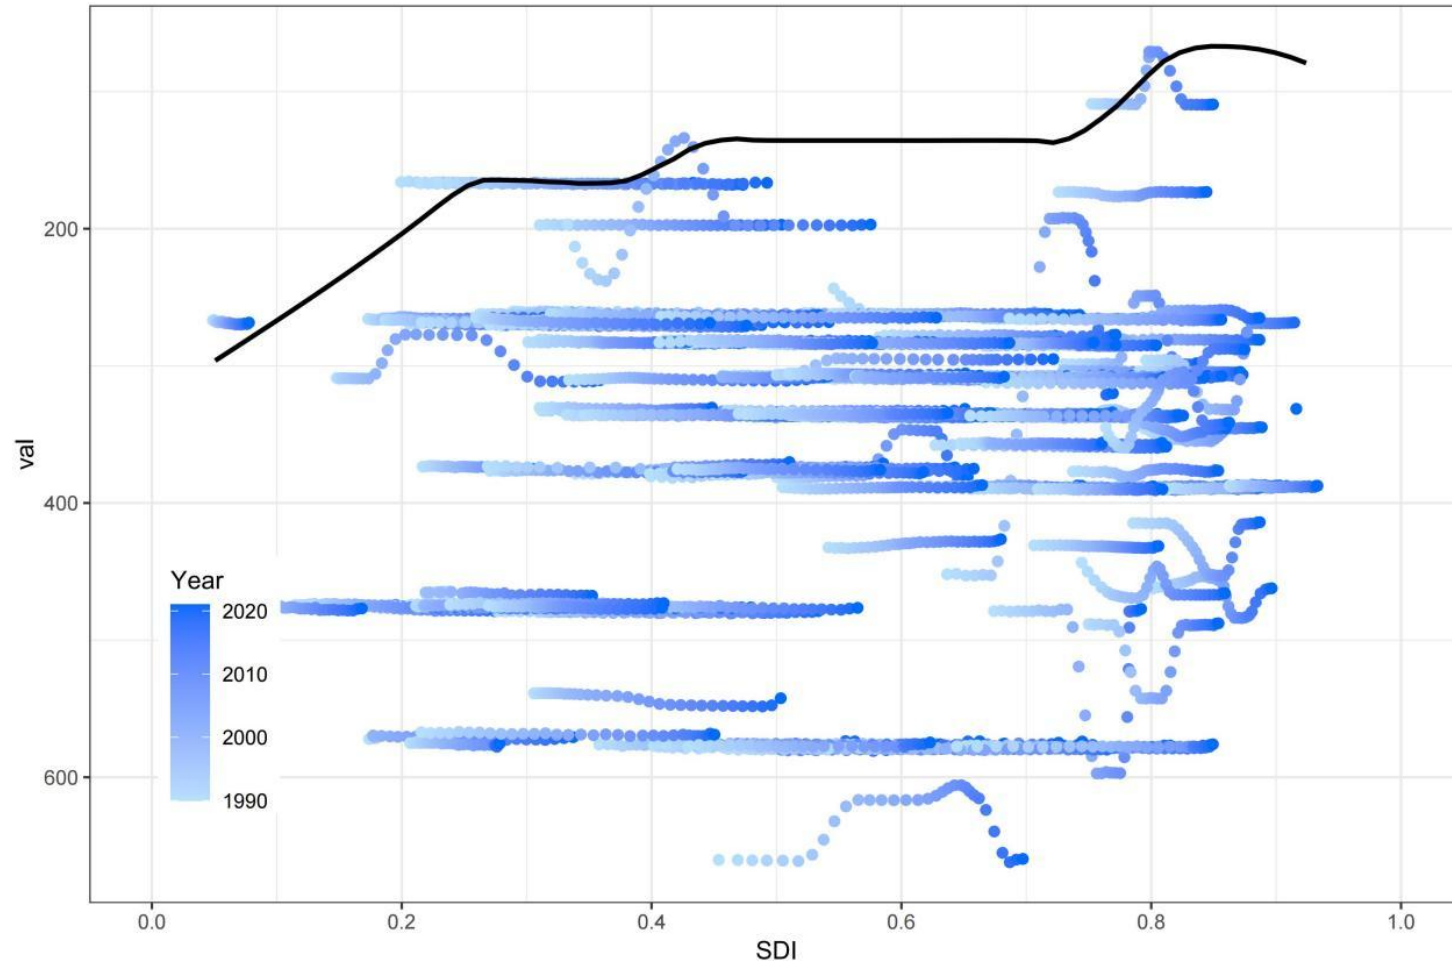

(D) Low back pain

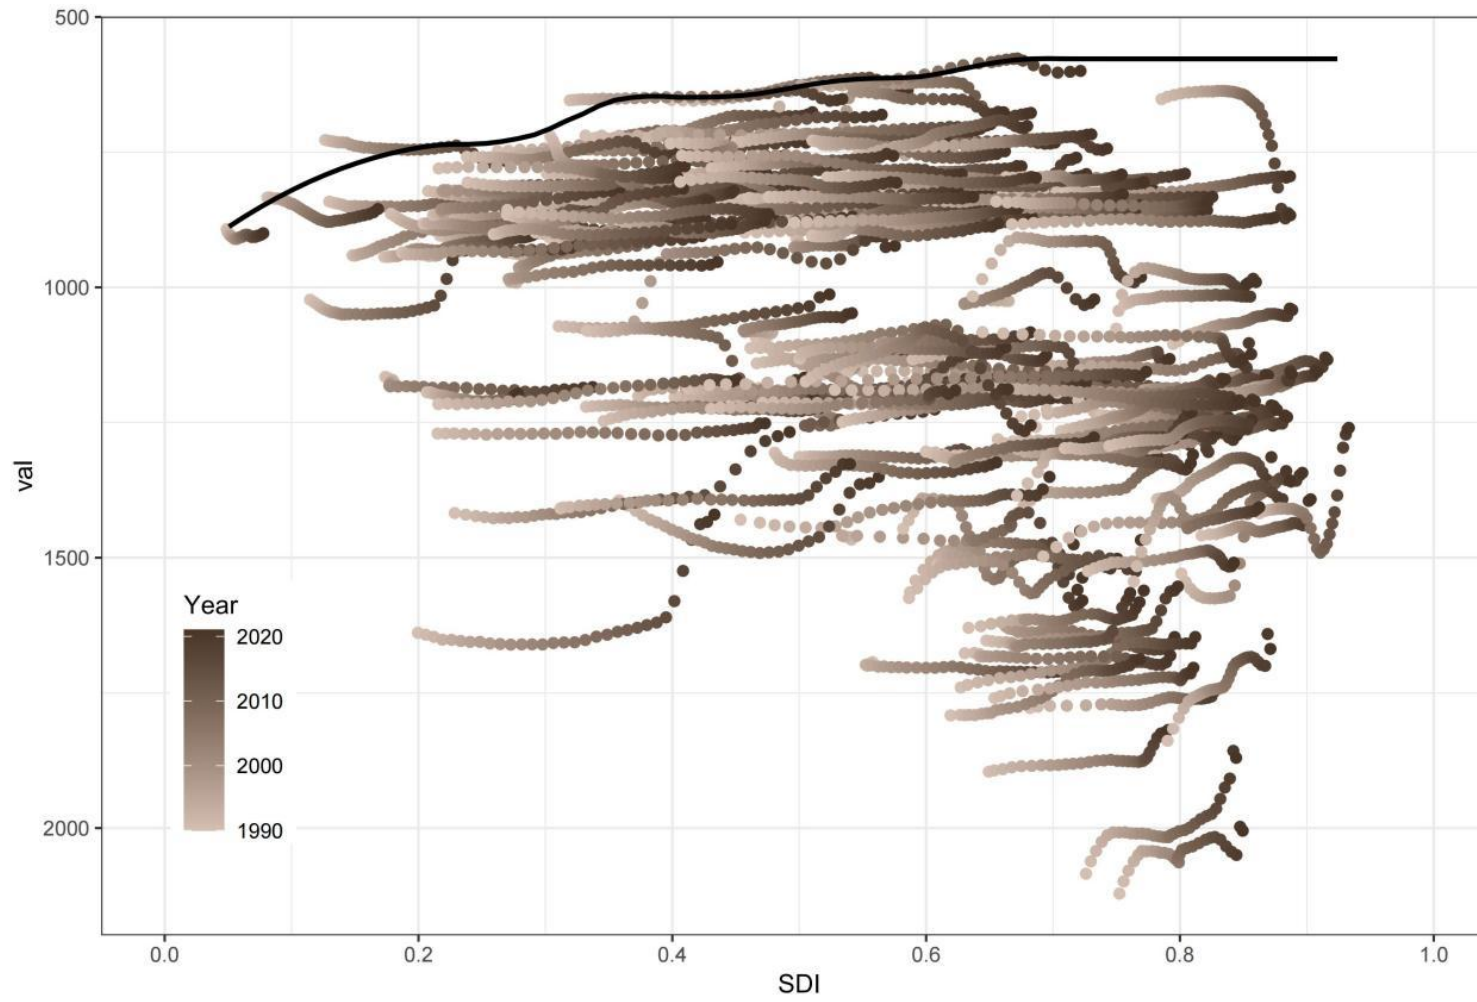

**Table S1. In 2021, years lived with disability for women of reproductive age globally, categorized by SDI and region, caused by rheumatoid arthritis, osteoarthritis, neck pain, and low back pain, along with the percentage change from 1990 to 2021**

| Location                                                | Years Lived with Disability |                                  |                             |                                  |                              |                                  |                                 |                                  |
|---------------------------------------------------------|-----------------------------|----------------------------------|-----------------------------|----------------------------------|------------------------------|----------------------------------|---------------------------------|----------------------------------|
|                                                         | Rheumatoid arthritis        |                                  | Osteoarthritis              |                                  | Neck pain                    |                                  | Low back pain                   |                                  |
|                                                         | 2021                        | Percentage change, 1990–2021 (%) | 2021                        | Percentage change, 1990–2021 (%) | 2021                         | Percentage change, 1990–2021 (%) | 2021                            | Percentage change, 1990–2021 (%) |
| <b>Global</b>                                           | 606536<br>(387295,893380)   | 86.8% (85.3, 86.4)               | 1608890<br>(749285,3242533) | 111.4%<br>(110.3, 110.8)         | 6354071<br>(3971382,9589428) | 58.8% (60.0, 61.3)               | 19512560<br>(13648548,26571084) | 39.5% (38.8, 40.8)               |
| <b>SDI quantile</b>                                     |                             |                                  |                             |                                  |                              |                                  |                                 |                                  |
| <b>High SDI</b>                                         | 108036<br>(71002,157320)    | 35.1% (33.7, 36.5)               | 263540<br>(121176,535041)   | 43.6% (43.0, 44.0)               | 908199<br>(566491,1372499)   | 15.5% (16.1, 17.0)               | 3393164<br>(2410723,4553222)    | 0.4% (-0.3, 1.8)                 |
| <b>High-middle SDI</b>                                  | 123928<br>(79505,180626)    | 64.6% (62.3, 62.9)               | 331105<br>(152754,667580)   | 93.9% (92.1, 93.5)               | 1143368<br>(708317,1738517)  | 24.9% (24.8, 27.0)               | 3117430<br>(2173404,4242895)    | 7.2% (7.2, 7.4)                  |
| <b>Middle SDI</b>                                       | 220863<br>(140586,324774)   | 98.0% (96.9, 97.4)               | 568111<br>(266030,1142097)  | 141.4%<br>(138.9, 139.6)         | 2096437<br>(1304775,3188789) | 61.1% (62.2, 63.6)               | 5606334<br>(3924576,7636153)    | 43.7% (43.7, 46.6)               |
| <b>Low-middle SDI</b>                                   | 118837<br>(76518,176014)    | 158.9%<br>(157.3, 161.9)         | 325068<br>(151173,657550)   | 154.4% (153.5, 155.6)            | 1397060<br>(877447,2092310)  | 104.6% (105.3, 105.3)            | 5011664<br>(3488787,6863269)    | 81.6% (81.4, 83.3)               |
| <b>Low SDI</b>                                          | 34481<br>(21467,51571)      | 191.7%<br>(186.3, 189.7)         | 119876<br>(56259,242601)    | 178.6%<br>(178.3, 179.1)         | 803642<br>(498135,1187883)   | 158.4% (158.2, 159.4)            | 2366674<br>(1637819,3218418)    | 131.4% (130.2, 130.2)            |
| <b>Central Europe, Eastern Europe, and Central Asia</b> | 40695<br>(26265,59640)      | 42.5% (41.2, 42.9)               | 95720<br>(43528,198069)     | 40.5% (39.8, 40.4)               | 352951<br>(217608,534475)    | 1.7% (3.0, 3.3)                  | 1488662<br>(1035101,2035154)    | -2.4% (-2.4, -1.8)               |
| <b>Central Asia</b>                                     | 9909<br>(6413,14233)        | 153.1%<br>(145.6, 150.5)         | 17514<br>(8065,36325)       | 161.3%<br>(160.1, 163.7)         | 76202<br>(46968,115632)      | 57.9% (56.4, 60.6)               | 276267<br>(192034,375672)       | 61.9% (61.8, 63.7)               |

|                                         |                          |                          |                           |                          |                                |                          |                              |                          |
|-----------------------------------------|--------------------------|--------------------------|---------------------------|--------------------------|--------------------------------|--------------------------|------------------------------|--------------------------|
| <b>Central Europe</b>                   | 10155<br>(6493,15184)    | 17.2% (16.6,<br>19.7)    | 25850<br>(11643,53771)    | 29.3% (27.7,<br>29.5)    | 91816<br>(56498,138920)        | -9.3% (-8.6, -8.0)       | 473008<br>(329136,647427)    | -12.9% (-13.0,<br>-12.8) |
| <b>Eastern Europe</b>                   | 20631<br>(13324,30132)   | 29.0% (28.1,<br>28.2)    | 52356<br>(23740,108687)   | 26.4% (25.8,<br>27.9)    | 184933<br>(113357,283552)      | -6.4% (-5.9, -5.4)       | 739388<br>(515763,1011926)   | -8.8% (-8.6, -8.5)       |
| <b>High-income</b>                      | 107497<br>(70834,156730) | 33.3% (31.9,<br>34.8)    | 258537<br>(119145,524411) | 35.6% (35.0,<br>35.6)    | 870903<br>(542351,1315843<br>) | 5.0% (4.6, 6.5)          | 3463375<br>(2458865,4643138) | -1.2% (-1.9, -0.1)       |
| <b>Australasia</b>                      | 3471<br>(2150,5258)      | 84.8% (80.5,<br>86.8)    | 7371<br>(3521,15290)      | 78.3% (77.8,<br>80.0)    | 12235<br>(7573,18430)          | 39.4% (38.2,<br>40.8)    | 142625<br>(99756,194532)     | 26.2% (25.9,<br>27.5)    |
| <b>High-income Asia<br/>Pacific</b>     | 16800<br>(10837,24740)   | 7.5% (5.7, 11.4)         | 53629<br>(24699,108274)   | 28.3% (26.6,<br>27.7)    | 121026<br>(75224,185272)       | -11.7% (-12.3,<br>-10.8) | 641293<br>(446987,878879)    | -20.5% (-20.6,<br>-20.4) |
| <b>High-income North<br/>America</b>    | 36432<br>(24632,51447)   | 42.1% (41.8,<br>44.0)    | 89015<br>(41435,181625)   | 36.4% (36.8,<br>37.7)    | 292876<br>(179995,440707)      | 12.9% (12.6,<br>13.0)    | 1213301<br>(867613,1596441)  | 3.9% (2.6, 5.8)          |
| <b>Southern Latin<br/>America</b>       | 8748<br>(5465,13025)     | 141.6%<br>(138.9, 150.8) | 15899<br>(7280,32619)     | 82.4% (79.5,<br>82.8)    | 49691<br>(30818,75917)         | 45.9% (46.7,<br>47.3)    | 276152<br>(192216,374965)    | 44.9% (46.9,<br>47.3)    |
| <b>Western Europe</b>                   | 42046<br>(27140,61565)   | 24.0% (21.8,<br>26.4)    | 92622<br>(42928,188416)   | 31.0% (30.5,<br>31.9)    | 395075<br>(244159,598216)      | 1.2% (-0.2, 2.6)         | 1190003<br>(839553,1600705)  | -3.0% (-2.9, -2.7)       |
| <b>Latin America and<br/>Caribbean</b>  | 85496<br>(56113,124535)  | 136.4%<br>(137.9, 140.7) | 126851<br>(58893,255822)  | 160.9% (158.3,<br>159.9) | 585825<br>(364421,882807)      | 68.6% (69.8,<br>71.4)    | 1882415<br>(1313980,2572575) | 69.4% (69.9,<br>72.1)    |
| <b>Andean Latin America</b>             | 14860<br>(9753,21527)    | 231.8%<br>(234.2, 236.4) | 14552<br>(6793,29517)     | 179.8% (179.7,<br>182.7) | 58794<br>(36158,88457)         | 97.2% (95.3,<br>97.2)    | 128521<br>(88603,175670)     | 97.0% (96.1,<br>98.8)    |
| <b>Caribbean</b>                        | 3371<br>(2169,5047)      | 81.4% (78.7,<br>91.6)    | 9389<br>(4398,19101)      | 85.4% (85.5,<br>88.4)    | 40618<br>(24998,61200)         | 36.5% (36.0,<br>36.7)    | 100701<br>(69716,135985)     | 35.1% (34.6,<br>36.4)    |
| <b>Central Latin America</b>            | 43840<br>(28578,64667)   | 167.9%<br>(166.8, 168.2) | 53491<br>(24741,108059)   | 178.6% (175.9,<br>176.3) | 248969<br>(154443,372445)      | 75.2% (72.3,<br>79.2)    | 833738<br>(583418,1136593)   | 75.6% (74.0,<br>80.2)    |
| <b>Tropical Latin America</b>           | 23425<br>(15293,34517)   | 74.0% (74.2,<br>78.1)    | 49418<br>(22962,99201)    | 158.0% (151.2,<br>156.3) | 237444<br>(147505,358448)      | 63.0% (63.8,<br>67.0)    | 819455<br>(574886,1114165)   | 65.0% (65.2,<br>67.4)    |
| <b>North Africa and<br/>Middle East</b> | 45654<br>(29771,66316)   | 243.7%<br>(234.0, 244.3) | 106252<br>(49143,212278)  | 247.2% (244.6,<br>248.9) | 946519<br>(595071,1446958)     | 136.8% (138.1,<br>139.5) | 1957256<br>(1363561,2648984) | 115.7% (111.8,<br>117.2) |

|                                                   |                               |                          |                            |                          |                                  |                          |                              |                          |
|---------------------------------------------------|-------------------------------|--------------------------|----------------------------|--------------------------|----------------------------------|--------------------------|------------------------------|--------------------------|
|                                                   |                               |                          |                            |                          | )                                |                          |                              |                          |
| <b>South Asia</b>                                 | 133091<br>(84547,197956)      | 169.8%<br>(167.4, 170.5) | 365778<br>(170736,735397)  | 168.9% (167.9,<br>170.3) | 932594<br>(575010,1424699<br>)   | 106.0% (105.0,<br>106.3) | 4793729<br>(3342819,6527975) | 80.6% (80.0,<br>81.9)    |
| <b>Southeast Asia, East<br/>Asia, and Oceania</b> | 161668<br>(103032,239552<br>) | 55.8% (52.8,<br>55.1)    | 537555<br>(251572,1091835) | 116.7% (112.7,<br>119.1) | 1673920<br>(1029603,255875<br>6) | 34.4% (35.3,<br>35.4)    | 3743166<br>(2601714,5110600) | 9.9% (10.3, 10.9)        |
| <b>East Asia</b>                                  | 142939<br>(91603,211349)      | 50.4% (48.3,<br>50.3)    | 409721<br>(192120,829456)  | 104.1% (100.0,<br>107.6) | 1119806<br>(688937,1704831<br>)  | 19.7% (18.2,<br>21.8)    | 2193208<br>(1533564,2991447) | -12.5% (-11.9,<br>-11.2) |
| <b>Oceania</b>                                    | 311 (193,484)                 | 185.0%<br>(183.4, 188.4) | 2254 (1065,4680)           | 205.7% (207.8,<br>211.4) | 9364<br>(5809,14037)             | 141.9% (140.3,<br>140.9) | 26680<br>(18533,36029)       | 136.9% (130.9,<br>138.5) |
| <b>Southeast Asia</b>                             | 18417<br>(11311,28226)        | 113.6%<br>(110.4, 113.0) | 125580<br>(58766,255932)   | 169.5% (167.8,<br>169.1) | 544751<br>(338581,838877)        | 77.8% (77.0,<br>82.5)    | 1523279<br>(1049601,2097277) | 71.5% (71.9,<br>73.0)    |
| <b>Sub-Saharan Africa</b>                         | 32435<br>(20472,47835)        | 149.4%<br>(147.3, 153.0) | 118195<br>(55054,237938)   | 203.4% (201.9,<br>204.3) | 991358<br>(616176,1465278<br>)   | 162.0% (161.2,<br>161.9) | 2183956<br>(1504821,2971262) | 149.1% (147.8,<br>149.1) |
| <b>Central Sub-Saharan<br/>Africa</b>             | 3782<br>(2304,5718)           | 220.2%<br>(207.1, 217.1) | 14442<br>(6732,29534)      | 198.0% (192.2,<br>201.4) | 108906<br>(67632,160151)         | 172.1% (172.0,<br>172.2) | 264495<br>(182700,362867)    | 162.1% (159.1,<br>160.3) |
| <b>Eastern Sub-Saharan<br/>Africa</b>             | 9127<br>(5592,14088)          | 190.2%<br>(191.8, 194.6) | 41321<br>(19336,83400)     | 200.4% (197.9,<br>201.4) | 263732<br>(163574,393337)        | 156.6% (154.9,<br>158.2) | 873256<br>(602947,1192464)   | 144.2% (142.2,<br>148.1) |
| <b>Southern Sub-Saharan<br/>Africa</b>            | 8516<br>(5634,12271)          | 53.5% (55.4,<br>55.9)    | 12473<br>(5689,25453)      | 134.0% (132.9,<br>135.9) | 88099<br>(55485,130648)          | 79.9% (78.4,<br>80.4)    | 153523<br>(106256,209129)    | 70.4% (69.8,<br>73.5)    |
| <b>Western Sub-Saharan<br/>Africa</b>             | 11010<br>(6756,16516)         | 251.5%<br>(242.7, 257.0) | 49959<br>(23330,100974)    | 232.6% (232.1,<br>232.7) | 530621<br>(328432,779039)        | 184.5% (183.1,<br>184.6) | 892683<br>(613410,1209554)   | 172.2% (170.1,<br>171.9) |

Values in parentheses are 95% uncertainty intervals.

**Table S2. In 2021, age-standardized years lived with disability rate for women of reproductive age globally, categorized by SDI and region, caused by rheumatoid arthritis, osteoarthritis, neck pain, and low back pain, along with the percentage change from 1990 to 2021**

| Location                                                | Age-standardized years lived with disability rate |                                  |                         |                                  |                           |                                  |                              |                                  |
|---------------------------------------------------------|---------------------------------------------------|----------------------------------|-------------------------|----------------------------------|---------------------------|----------------------------------|------------------------------|----------------------------------|
|                                                         | Rheumatoid arthritis                              |                                  | Osteoarthritis          |                                  | Neck pain                 |                                  | Low back pain                |                                  |
|                                                         | 2021                                              | Percentage change, 1990–2021 (%) | 2021                    | Percentage change, 1990–2021 (%) | 2021                      | Percentage change, 1990–2021 (%) | 2021                         | Percentage change, 1990–2021 (%) |
| <b>Global</b>                                           | 30.22<br>(19.16,45.39)                            | 13.6% (12.9, 14.3)               | 77.86<br>(36.07,159.26) | 11.2% (10.4, 11.3)               | 319.13<br>(166.2,554.83)  | 0.2% (0.2, 0.3)                  | 984.82<br>(606.16,1469.53)   | -10.6% (-10.7, -10.6)            |
| <b>SDI quantile</b>                                     |                                                   |                                  |                         |                                  |                           |                                  |                              |                                  |
| <b>High SDI</b>                                         | 39.52<br>(25.46,58.13)                            | 16.1% (8.3, 14.0)                | 85.79<br>(39.84,176.76) | 10.5% (10.4, 10.4)               | 348.73<br>(182.1,602.41)  | 2.9% (2.1, 3.9)                  | 1317.67<br>(843.27,1907.7)   | -9.9% (-12.0, -7.7)              |
| <b>High-middle SDI</b>                                  | 35.07<br>(21.75,53.08)                            | 22.5% (21.0, 21.7)               | 82.12<br>(37.86,168.4)  | 14.0% (13.8, 13.9)               | 336.6<br>(173.76,587.96)  | -1.5% (-2.1, -0.4)               | 948.45<br>(583.08,1421.12)   | -12.4% (-12.4, -12.1)            |
| <b>Middle SDI</b>                                       | 33.57 (21.1,50.5)                                 | 17.2% (15.9, 17.9)               | 81.26<br>(37.64,165.87) | 13.3% (11.2, 13.7)               | 323.42<br>(166.65,564.9)  | 0.7% (0.9, 0.9)                  | 875.59<br>(534.18,1312.36)   | -7.4% (-7.5, -7.2)               |
| <b>Low-middle SDI</b>                                   | 24.46<br>(15.44,37.08)                            | 28.8% (27.9, 32.5)               | 71.26<br>(33.06,145.15) | 14.4% (14.0, 14.5)               | 285.63<br>(148.28,497.16) | 3.3% (2.9, 3.3)                  | 1018.56<br>(621.11,1536.76)  | -6.8% (-7.8, -6.0)               |
| <b>Low SDI</b>                                          | 14.48 (8.77,22.56)                                | 17.6% (17.6, 18.5)               | 59.8<br>(28.08,121.39)  | 9.9% (9.7, 10.1)                 | 330.07<br>(169.99,572.86) | 4.2% (4.1, 4.4)                  | 947.25<br>(580.84,1416.13)   | -6.3% (-6.9, -6.3)               |
| <b>Central Europe, Eastern Europe, and Central Asia</b> | 35.55<br>(22.23,53.31)                            | 29.1% (28.6, 29.5)               | 75.02<br>(33.89,156.86) | 7.6% (7.5, 7.8)                  | 333.85<br>(169.11,593.53) | -0.7% (-0.7, -0.4)               | 1385.67<br>(858.21,2062.79)  | -6.3% (-6.2, -6.1)               |
| <b>Central Asia</b>                                     | 39.19<br>(23.64,59.75)                            | 48.1% (46.2, 48.9)               | 70.48<br>(31.94,147.27) | 18.0% (16.0, 18.7)               | 307.57<br>(153.21,543.65) | 0.0% (-0.6, -0.1)                | 1115.09<br>(690.41,1661.12)  | -0.8% (-0.7, 0.1)                |
| <b>Central Europe</b>                                   | 32.75 (19.93,50.5)                                | 21.2% (20.5, 22.0)               | 70.94<br>(32.33,148.08) | 14.5% (13.9, 14.6)               | 325.9<br>(165.46,577.67)  | 0.7% (0.9,1.5)                   | 1670.25<br>(1038.16,2490.03) | -3.5% (-3.8, -3.0)               |
| <b>Eastern Europe</b>                                   | 35.11<br>(21.83,52.46)                            | 26.0% (24.7, 26.7)               | 79.05<br>(35.54,166.4)  | 3.5% (3.2, 3.9)                  | 351.72<br>(176.09,627.47) | 0.1% (0.1, 0.5)                  | 1371.43<br>(847.73,2046.73)  | -4.7% (-4.8, -4.4)               |
| <b>High-income</b>                                      | 39.96 (25.77,58.8)                                | 20.0% (18.7, 21.9)               | 84.48<br>(39.25,174.41) | 9.6% (9.5, 9.7)                  | 341.09<br>(176.69,589.53) | -1.8% (-2.8, -1.2)               | 1368.65<br>(874.99,1990.97)  | -7.2% (-8.9, -4.8)               |

|                                               |                      |                    |                      |                    |                        |                    |                          |                       |
|-----------------------------------------------|----------------------|--------------------|----------------------|--------------------|------------------------|--------------------|--------------------------|-----------------------|
| <b>Australasia</b>                            | 43.55 (23.7,71.16)   | 26.8% (25.9, 27.8) | 85.51 (39.75,174.65) | 12.0% (11.4, 11.6) | 162.66 (80.52,292.87)  | 0.1% (-0.2, 1.8)   | 1892.02 (1177.6,2832.22) | -9.5% (-10.0, -8.7)   |
| <b>High-income Asia Pacific</b>               | 35.93 (21.74,55.57)  | 12.0% (11.1, 14.2) | 93.16 (42.59,193.76) | 15.7% (13.5, 16.7) | 290.78 (148.73,512.29) | -0.6% (-1.0, -0.6) | 1551.35 (954.87,2324.74) | -10.4% (-10.6, -10.0) |
| <b>High-income North America</b>              | 40.42 (26.58,58.3)   | 20.7% (19.6, 21.5) | 91.61 (42.84,188.14) | 6.9% (6.4, 7.6)    | 337.91 (171.73,596.65) | -1.0% (-1.1, -1.1) | 1391.46 (925.38,1947.09) | -9.0% (-13.7, -3.7)   |
| <b>Southern Latin America</b>                 | 47.65 (27.35,75.69)  | 58.4% (56.7, 64.0) | 82.85 (38.43,170.99) | 11.0% (9.3, 11.3)  | 277.8 (139.77,488.63)  | -0.4% (-0.2, 0.2)  | 1544.37 (949.54,2322.49) | -1.0% (-0.7, -0.6)    |
| <b>Western Europe</b>                         | 39.56 (24.71,59.86)  | 15.9% (14.8, 17.4) | 74.78 (34.97,154.02) | 8.1% (8.5, 8.6)    | 387.86 (202.3,657.22)  | -2.4% (-5.2, -1.0) | 1203.12 (745.79,1795.66) | -4.6% (-5.5, -3.6)    |
| <b>Latin America and Caribbean</b>            | 52.14 (33.26,77.03)  | 27.0% (25.1, 27.7) | 75.31 (35.05,154.51) | 15.0% (14.8, 16.1) | 363.67 (185.22,637.47) | -0.3% (-0.9, -0.3) | 1169.49 (720.6,1746.2)   | -0.4% (0.3, -0.7)     |
| <b>Andean Latin America</b>                   | 85.01 (52.12,129.76) | 59.7% (59.3, 60.5) | 85.27 (39.5,175.85)  | 12.6% (11.7, 14.4) | 335.54 (168.86,590.3)  | -0.2% (-0.7, 0.4)  | 736.5 (448.17,1110.41)   | -0.3% (-0.7, -0.5)    |
| <b>Caribbean</b>                              | 27.43 (16.43,42.96)  | 23.3% (22.0, 27.3) | 74.82 (34.69,155.07) | 9.1% (9.6, 12.0)   | 333.84 (169.65,591.95) | -0.2% (-0.3, 0.2)  | 828.29 (511.92,1234.35)  | -1.8% (-2.7, -0.6)    |
| <b>Central Latin America</b>                  | 63.06 (39.75,93.91)  | 31.5% (29.0, 33.5) | 75.76 (34.97,155.18) | 15.2% (14.1, 15.6) | 362.07 (185.04,632.4)  | -0.3% (-0.7, -0.7) | 1213.43 (746.22,1813.48) | -0.2% (-0.7, 0.8)     |
| <b>Tropical Latin America</b>                 | 36.71 (22.71,55.23)  | 0.9% (0.4, 0.4)    | 72.46 (33.89,148.25) | 16.5% (16.2, 17.9) | 379.65 (190.9,664.66)  | -0.1% (-0.7, -0.3) | 1312.49 (807.43,1967.7)  | 0.3% (0.2, 1.0)       |
| <b>North Africa and Middle East</b>           | 28.36 (17.74,42.86)  | 47.1% (45.4, 49.5) | 67.05 (30.86,136.97) | 21.0% (20.4, 21.0) | 588.7 (302.37,1009.32) | -0.3% (-0.6, -0.6) | 1222.61 (753.74,1835.17) | -0.6% (-1.8, 0.7)     |
| <b>South Asia</b>                             | 27.74 (17.08,42.49)  | 29.3% (28.4, 30.8) | 80.51 (37.18,164.55) | 17.0% (16.2, 17.2) | 193.57 (98.95,343.25)  | 0.0% (0.0, 0.1)    | 993.5 (603.88,1495.84)   | -11.2% (-12.5, -10.8) |
| <b>Southeast Asia, East Asia, and Oceania</b> | 27.64 (16.99,41.99)  | 6.6% (5.1, 6.9)    | 82.55 (38.7,167.85)  | 13.4% (12.0, 13.7) | 292.76 (149.48,512.2)  | -2.9% (-3.3, -2.3) | 676.2 (412.14,1018.66)   | -16.6% (-16.7, -16.2) |
| <b>East Asia</b>                              | 36.83 (22.63,55.84)  | 14.2% (12.3, 14.4) | 90.94 (42.92,184.36) | 14.3% (13.6, 14.6) | 294.63 (150.27,516.86) | -4.2% (-4.8, -2.5) | 608.12 (370.01,917.2)    | -25.1% (-25.3, -24.6) |

|                                    |                    |                       |                         |                    |                           |                    |                            |                    |
|------------------------------------|--------------------|-----------------------|-------------------------|--------------------|---------------------------|--------------------|----------------------------|--------------------|
| <b>Oceania</b>                     | 9.36 (5.1,15.42)   | 18.5% (18.4, 20.2)    | 74.47<br>(34.74,153.84) | 11.9% (12.5, 13.5) | 282.56<br>(141.28,496.53) | 0.3% (0.7, 0.3)    | 796.49<br>(485.05,1207.59) | 0.1% (0.4, 0.9)    |
| <b>Southeast Asia</b>              | 9.71 (5.61,15.66)  | 19.8% (19.2, 21.0)    | 63.64<br>(29.57,129.68) | 19.4% (18.7, 18.8) | 288.23<br>(145.73,506.74) | 1.0% (0.6, 1.3)    | 811.25<br>(492.02,1221.96) | 0.5% (-0.3, 1.1)   |
| <b>Sub-Saharan Africa</b>          | 13.42 (8.27,20.37) | -4.1% (-4.8, -4.0)    | 58.54<br>(27.12,119.37) | 10.5% (10.0, 10.2) | 400<br>(204.61,691.32)    | 1.4% (1.3, 1.5)    | 855.75<br>(525.19,1284.8)  | -3.0% (-3.6, -2.6) |
| <b>Central Sub-Saharan Africa</b>  | 13.61 (7.14,22.35) | 18.8% (17.5, 18.2)    | 60.73<br>(27.74,124.55) | 5.6% (3.9, 5.4)    | 376.04<br>(190.7,653.15)  | 0.9% (0.7, 0.9)    | 888.59<br>(543.24,1339.07) | -2.4% (-3.1, -2.6) |
| <b>Eastern Sub-Saharan Africa</b>  | 10.09 (5.89,15.89) | 13.1% (11.3, 14.1)    | 55.77<br>(25.98,113.84) | 12.3% (11.9, 13.1) | 284.3<br>(144.84,503.19)  | 0.5% (0.2, 0.2)    | 903.16<br>(554.24,1353.39) | -3.5% (-3.5, -3.3) |
| <b>Southern Sub-Saharan Africa</b> | 39.63 (25.1,59.29) | -19.4% (-18.7, -17.9) | 62.84<br>(28.76,130.37) | 7.9% (8.2, 8.5)    | 412.28<br>(209.92,716.89) | -1.4% (-2.0, -1.8) | 716.3<br>(439.01,1078.09)  | -5.7% (-5.6, -5.2) |
| <b>Western Sub-Saharan Africa</b>  | 10.61 (6.34,16.35) | 24.3% (21.0, 25.3)    | 59.32<br>(27.72,121.34) | 11.5% (11.2, 11.9) | 507.59<br>(260.97,876.11) | 0.9% (0.7, 0.9)    | 833.58<br>(510.14,1252.1)  | -3.0% (-4.4, -2.0) |

Values in parentheses are 95% uncertainty intervals.

**Table S3. In 2021, years lived with disability for women of reproductive age in 204 countries or territories, caused by rheumatoid arthritis, osteoarthritis, neck pain, and low back pain, along with estimated annual percentage changes from 1990 to 2021**

| Location                         | Years Lived with Disability |                      |                    |                       |                          |                        |                           |                         |
|----------------------------------|-----------------------------|----------------------|--------------------|-----------------------|--------------------------|------------------------|---------------------------|-------------------------|
|                                  | Rheumatoid arthritis        |                      | Osteoarthritis     |                       | Neck pain                |                        | Low back pain             |                         |
|                                  | 2021                        | EAPC (%)             | 2021               | EAPC (%)              | 2021                     | EAPC (%)               | 2021                      | EAPC (%)                |
| American Samoa                   | 2 (1,3)                     | 0.66<br>(0.28, 1.04) | 13 (6,27)          | 1.71<br>(1.23, 2.19)  | 34 (21,50)               | 0.14<br>(-0.16, 0.45)  | 95 (65,128)               | 0.01<br>(-0.28, 0.31)   |
| Antigua and Barbuda              | 7 (4,10)                    | 2.82<br>(2.39, 3.26) | 23 (11,48)         | 3.07<br>(2.57, 3.56)  | 85 (51,127)              | 1.47<br>(1.13, 1.81)   | 210 (143,285)             | 1.56<br>(1.21, 1.92)    |
| Arab Republic of Egypt           | 7536 (4582,11194)           | 3.92<br>(3.86, 3.98) | 15405 (7041,31507) | 2.99<br>(2.88, 3.1)   | 143851<br>(89841,217082) | 2.39<br>(2.32, 2.47)   | 312844<br>(213026,426740) | 2.42<br>(2.28, 2.56)    |
| Argentine Republic               | 5380 (3348,8148)            | 2.8<br>(2.72, 2.87)  | 10728 (4960,21879) | 1.81<br>(1.75, 1.88)  | 33786 (20920,51588)      | 1.38<br>(1.36, 1.4)    | 186707<br>(129910,253154) | 1.34<br>(1.28, 1.4)     |
| Australia                        | 2856 (1758,4367)            | 1.99<br>(1.87, 2.12) | 6289 (2995,13018)  | 1.69<br>(1.54, 1.85)  | 10892 (6770,16356)       | 0.97<br>(0.93, 1.01)   | 117857<br>(82018,161633)  | 0.77<br>(0.75, 0.79)    |
| Barbados                         | 31 (18,47)                  | 1.51<br>(1.27, 1.74) | 75 (35,153)        | 1.73<br>(1.4, 2.06)   | 251 (154,380)            | 0.33<br>(0.26, 0.4)    | 630 (434,859)             | 0.37<br>(0.29, 0.46)    |
| Belize                           | 37 (23,56)                  | 5.25<br>(5.08, 5.43) | 85 (40,177)        | 5.42<br>(5.21, 5.62)  | 393 (241,590)            | 3.79<br>(3.71, 3.86)   | 1003 (701,1361)           | 3.84<br>(3.77, 3.92)    |
| Bermuda                          | 5 (3,8)                     | 0.57<br>(0.3, 0.84)  | 17 (8,35)          | 0.41<br>(0.04, 0.79)  | 49 (31,76)               | -0.68<br>(-0.86, -0.5) | 127 (88,172)              | -0.65<br>(-0.84, -0.46) |
| Bolivarian Republic of Venezuela | 4106 (2571,6067)            | 3.37<br>(3.01, 3.73) | 6301 (2829,12883)  | 3.01<br>(2.74, 3.28)  | 23812 (14583,36000)      | 1.75<br>(1.51, 2)      | 76597<br>(52137,104978)   | 1.52<br>(1.28, 1.76)    |
| Bosnia and Herzegovina           | 323 (202,495)               | 0.41<br>(0.19, 0.62) | 673 (304,1382)     | 0.34<br>(-0.05, 0.74) | 2438 (1504,3707)         | -1.15<br>(-1.3, -0.99) | 12516 (8730,17228)        | -0.92<br>(-1.04, -0.81) |
| Brunei Darussalam                | 46 (28,70)                  | 3.28<br>(2.91, 3.65) | 134 (62,277)       | 3.71<br>(3.33, 4.1)   | 341 (211,522)            | 2.21<br>(1.99, 2.43)   | 1681 (1161,2289)          | 1.92<br>(1.7, 2.14)     |
| Burkina Faso                     | 472 (265,746)               | 4.05<br>(3.96, 4.15) | 1953 (906,4043)    | 3.34<br>(3.28, 3.41)  | 22610 (13949,33118)      | 3.2<br>(3.17, 3.24)    | 41531<br>(28498,56061)    | 3.17<br>(3.12, 3.22)    |
| Canada                           | 4092 (2711,5739)            | 1.36<br>(1.11, 1.6)  | 6953 (3255,14073)  | 0.98<br>(0.64, 1.32)  | 26778 (16375,41231)      | 0.3<br>(0.23, 0.38)    | 110086<br>(77236,147839)  | 0.11<br>(0.04, 0.18)    |

|                                              |                  |                      |                    |                      |                      |                        |                           |                         |
|----------------------------------------------|------------------|----------------------|--------------------|----------------------|----------------------|------------------------|---------------------------|-------------------------|
| Central African Republic                     | 151 (91,231)     | 2.88<br>(2.81, 2.96) | 550 (256,1110)     | 2.84<br>(2.79, 2.89) | 4632 (2868,6823)     | 2.62<br>(2.55, 2.69)   | 11313 (7753,15389)        | 2.54<br>(2.46, 2.63)    |
| Commonwealth of Dominica                     | 4 (3,6)          | 1.22<br>(1.02, 1.41) | 13 (6,26)          | 1.66<br>(1.36, 1.95) | 55 (34,82)           | 0.2<br>(0.13, 0.28)    | 140 (96,191)              | 0.17<br>(0.08, 0.26)    |
| Commonwealth of the Bahamas                  | 32 (20,49)       | 2.61<br>(2.3, 2.93)  | 100 (46,200)       | 3.02<br>(2.68, 3.36) | 368 (228,557)        | 1.47<br>(1.33, 1.61)   | 912 (631,1249)            | 1.52<br>(1.36, 1.67)    |
| Cook Islands                                 | 1 (0,1)          | 1.31<br>(1.16, 1.46) | 5 (2,10)           | 1.86<br>(1.5, 2.21)  | 13 (8,19)            | 0.3<br>(0.11, 0.49)    | 36 (25,49)                | 0.24<br>(0.06, 0.42)    |
| Czech Republic                               | 983 (628,1483)   | 0.94<br>(0.86, 1.02) | 2734 (1279,5739)   | 0.4<br>(0.15, 0.64)  | 7913 (4810,11973)    | -0.17<br>(-0.2, -0.13) | 44926<br>(31864,62484)    | -0.24<br>(-0.28, -0.19) |
| Democratic People's Republic of Korea        | 2033 (1207,3076) | 2.19<br>(2.02, 2.36) | 6846 (3131,14101)  | 2.31<br>(2.04, 2.59) | 19810 (12041,30434)  | 1.13<br>(0.98, 1.29)   | 54964<br>(37978,77346)    | 0.84<br>(0.7, 0.99)     |
| Democratic Republic of Sao Tome and Principe | 6 (4,10)         | 3.92<br>(3.77, 4.06) | 32 (15,66)         | 4.22<br>(4.16, 4.29) | 246 (153,362)        | 2.92<br>(2.9, 2.95)    | 382 (262,524)             | 2.79<br>(2.78, 2.8)     |
| Democratic Republic of the Congo             | 2291 (1357,3547) | 3.41<br>(3.32, 3.5)  | 8571 (3996,17421)  | 3.09<br>(3.04, 3.15) | 70556 (43680,104024) | 3.06<br>(3.05, 3.07)   | 173036<br>(120180,237620) | 2.93<br>(2.91, 2.96)    |
| Democratic Republic of Timor-Leste           | 25 (14,40)       | 2.44<br>(2.25, 2.62) | 154 (71,309)       | 2.31<br>(2.18, 2.45) | 788 (493,1180)       | 1.72<br>(1.55, 1.9)    | 2214 (1504,3018)          | 1.58<br>(1.37, 1.78)    |
| Democratic Socialist Republic of Sri Lanka   | 493 (278,780)    | 1.84<br>(1.81, 1.86) | 4313 (2039,9067)   | 2<br>(1.84, 2.16)    | 15518 (9540,23431)   | 0.94<br>(0.83, 1.04)   | 42776<br>(29098,59588)    | 0.82<br>(0.71, 0.92)    |
| Dominican Republic                           | 483 (289,750)    | 2.7<br>(2.66, 2.74)  | 2164 (990,4502)    | 2.99<br>(2.82, 3.15) | 9633 (5864,14582)    | 1.55<br>(1.49, 1.62)   | 24681<br>(17134,33502)    | 1.69<br>(1.64, 1.75)    |
| Eastern Republic of Uruguay                  | 334 (207,517)    | 1.64<br>(1.57, 1.71) | 791 (373,1597)     | 1.01<br>(0.94, 1.08) | 2396 (1496,3668)     | 0.4<br>(0.36, 0.44)    | 13402 (9441,18171)        | 0.61<br>(0.53, 0.68)    |
| Federal Democratic                           | 2268 (1384,3453) | 2.95                 | 11082 (5147,22667) | 3.54                 | 74525 (46547,112899) | 2.73                   | 220687                    | 2.55                    |

|                                      |                        |                         |                     |                        |                           |                         |                            |                         |
|--------------------------------------|------------------------|-------------------------|---------------------|------------------------|---------------------------|-------------------------|----------------------------|-------------------------|
| Republic of Ethiopia                 |                        | (2.84, 3.06)            |                     | (3.39, 3.68)           |                           | (2.44, 3.02)            | (151824,300161)            | (2.43, 2.67)            |
| Federal Democratic Republic of Nepal | 2507 (1555,3838)       | 4.06<br>(3.93, 4.19)    | 5683 (2693,11444)   | 3.3<br>(3.25, 3.36)    | 14302 (8895,22025)        | 2.49<br>(2.47, 2.51)    | 123336<br>(85393,166715)   | 2.07<br>(1.92, 2.21)    |
| Federal Republic of Germany          | 7373 (4519,11374)      | 0.33<br>(0.1, 0.57)     | 16215 (7635,33253)  | 0.46<br>(0.07, 0.85)   | 71694 (44663,110317)      | -0.34<br>(-0.5, -0.18)  | 251169<br>(176175,340912)  | -0.47<br>(-0.61, -0.32) |
| Federal Republic of Nigeria          | 5274 (3251,7953)       | 4.32<br>(4.27, 4.38)    | 23578 (10925,47308) | 4.59<br>(4.42, 4.75)   | 270046<br>(167451,406604) | 3.65<br>(3.59, 3.71)    | 434828<br>(298627,591379)  | 3.42<br>(3.3, 3.53)     |
| Federal Republic of Somalia          | 372 (217,575)          | 3.43<br>(3.29, 3.57)    | 1720 (830,3550)     | 2.72<br>(2.41, 3.03)   | 11201 (6782,16981)        | 3.37<br>(3.25, 3.49)    | 39196<br>(27073,53881)     | 3.44<br>(3.34, 3.53)    |
| Federated States of Micronesia       | 4 (2,6)                | 1.52<br>(1.32, 1.72)    | 21 (9,42)           | 1.75<br>(1.42, 2.07)   | 70 (43,105)               | 0.51<br>(0.36, 0.66)    | 206 (142,280)              | 0.46<br>(0.32, 0.61)    |
| Federative Republic of Brazil        | 22317<br>(14534,32955) | 1.98<br>(1.85, 2.12)    | 48130 (22389,96674) | 3.06<br>(2.9, 3.23)    | 231199<br>(143643,349604) | 1.36<br>(1.23, 1.5)     | 798563<br>(560269,1085028) | 1.59<br>(1.48, 1.71)    |
| French Republic                      | 4509 (2839,6810)       | 0.96<br>(0.82, 1.1)     | 13512 (6319,27480)  | 0.67<br>(0.46, 0.88)   | 45399 (27390,69243)       | -0.13<br>(-0.42, 0.15)  | 183984<br>(130218,249012)  | -0.09<br>(-0.16, -0.03) |
| Gabonese Republic                    | 90 (54,140)            | 4.18<br>(4.13, 4.23)    | 271 (128,545)       | 4.05<br>(3.91, 4.2)    | 1682 (1049,2451)          | 2.86<br>(2.81, 2.91)    | 3805 (2634,5142)           | 2.78<br>(2.72, 2.83)    |
| Georgia                              | 166 (100,247)          | -1.06<br>(-1.16, -0.96) | 652 (300,1363)      | -0.6<br>(-0.92, -0.28) | 2607 (1591,3937)          | -1.7<br>(-1.82, -1.58)  | 8821 (6222,11978)          | -1.74<br>(-1.9, -1.57)  |
| Grand Duchy of Luxembourg            | 67 (42,103)            | 2.36<br>(2.33, 2.39)    | 152 (72,318)        | 2.41<br>(2.31, 2.52)   | 663 (406,1018)            | 1.69<br>(1.66, 1.72)    | 2041 (1445,2740)           | 1.55<br>(1.51, 1.59)    |
| Greenland                            | 3 (2,5)                | 0.91<br>(0.68, 1.14)    | 8 (4,17)            | 1.03<br>(0.34, 1.71)   | 39 (24,60)                | -0.31<br>(-0.47, -0.15) | 157 (109,217)              | -0.43<br>(-0.57, -0.3)  |
| Grenada                              | 6 (3,8)                | 2.64<br>(2.22, 3.06)    | 21 (10,44)          | 2.86<br>(2.46, 3.26)   | 86 (53,131)               | 1.12<br>(0.79, 1.46)    | 217 (149,298)              | 1.17<br>(0.84, 1.5)     |
| Guam                                 | 6 (3,8)                | 1.26<br>(0.95, 1.57)    | 39 (18,79)          | 1.68<br>(1.27, 2.1)    | 107 (67,161)              | 0.29<br>(0.04, 0.54)    | 293 (205,405)              | 0.18<br>(-0.06, 0.42)   |
| Hashemite Kingdom of Jordan          | 900 (554,1321)         | 6.72<br>(6.43, 7.01)    | 2045 (957,4173)     | 6.69<br>(6.4, 6.98)    | 16830 (10594,25439)       | 5.05<br>(4.87, 5.23)    | 36245<br>(25318,49824)     | 4.64<br>(4.46, 4.81)    |

|                                       |                        |                       |                     |                       |                           |                        |                           |                         |
|---------------------------------------|------------------------|-----------------------|---------------------|-----------------------|---------------------------|------------------------|---------------------------|-------------------------|
| Hellenic Republic                     | 1025 (667,1535)        | 0.48<br>(0.25, 0.72)  | 2339 (1120,4739)    | 1.3<br>(1.04, 1.55)   | 11798 (7217,18072)        | 0.01<br>(-0.51, 0.53)  | 26742<br>(18619,36147)    | -0.36<br>(-0.55, -0.17) |
| Hungary                               | 885 (560,1367)         | 0.52<br>(0.44, 0.6)   | 2494 (1128,5198)    | 0.16<br>(-0.07, 0.39) | 7326 (4449,11177)         | -0.43<br>(-0.5, -0.36) | 43330<br>(30110,60241)    | -0.56<br>(-0.62, -0.49) |
| Independent State of Papua New Guinea | 217 (131,337)          | 4.15<br>(4.13, 4.17)  | 1586 (748,3320)     | 4.45<br>(4.37, 4.53)  | 7023 (4336,10542)         | 3.64<br>(3.59, 3.68)   | 19932<br>(13661,26910)    | 3.63<br>(3.56, 3.7)     |
| Independent State of Samoa            | 6 (4,10)               | 1.74<br>(1.61, 1.87)  | 36 (17,73)          | 2.2<br>(1.96, 2.44)   | 127 (80,188)              | 1.13<br>(1.04, 1.21)   | 374 (258,509)             | 0.83<br>(0.73, 0.93)    |
| Ireland                               | 756 (463,1139)         | 2.43<br>(2.22, 2.65)  | 1181 (547,2420)     | 2.3<br>(2.22, 2.39)   | 4974 (3088,7491)          | 1.44<br>(1.31, 1.57)   | 15077<br>(10568,20429)    | 1.28<br>(1.12, 1.44)    |
| Islamic Republic of Afghanistan       | 1131 (680,1667)        | 5.02<br>(4.85, 5.19)  | 2803 (1323,5638)    | 4.91<br>(4.09, 5.73)  | 34942 (21683,52680)       | 4.12<br>(3.97, 4.27)   | 79792<br>(55879,108630)   | 4.03<br>(3.89, 4.16)    |
| Islamic Republic of Iran              | 5683 (3520,8531)       | 4.02<br>(3.86, 4.18)  | 16462 (7437,33034)  | 4.46<br>(4.41, 4.52)  | 168200<br>(104884,256307) | 2.82<br>(2.76, 2.88)   | 326982<br>(228556,446201) | 2.23<br>(2, 2.47)       |
| Islamic Republic of Mauritania        | 124 (76,192)           | 3.73<br>(3.67, 3.8)   | 509 (237,1064)      | 3.39<br>(3.32, 3.45)  | 4516 (2773,6608)          | 2.69<br>(2.65, 2.73)   | 7676 (5169,10399)         | 2.53<br>(2.47, 2.59)    |
| Islamic Republic of Pakistan          | 19275<br>(12155,28465) | 3.57<br>(3.41, 3.73)  | 35280 (16440,71833) | 3.98<br>(3.83, 4.12)  | 112385<br>(69912,171296)  | 3.34<br>(3.29, 3.39)   | 669364<br>(459442,932267) | 3.76<br>(3.62, 3.89)    |
| Jamaica                               | 197 (122,299)          | 2.43<br>(2.14, 2.71)  | 575 (269,1198)      | 2.46<br>(2.12, 2.8)   | 2609 (1600,3882)          | 1.06<br>(0.93, 1.19)   | 6721 (4612,9261)          | 1.07<br>(0.91, 1.23)    |
| Japan                                 | 11567 (7053,17248)     | 0.02<br>(-0.11, 0.14) | 34052 (15582,68864) | 0.62<br>(0.23, 1.01)  | 82766 (51477,126726)      | -0.64<br>(-0.7, -0.58) | 450793<br>(313709,616597) | -0.89<br>(-0.94, -0.84) |
| Kingdom of Bahrain                    | 211 (128,321)          | 6.46<br>(6.12, 6.81)  | 264 (125,536)       | 6.31<br>(5.84, 6.77)  | 1950 (1218,2979)          | 4.57<br>(4.19, 4.95)   | 3884 (2637,5274)          | 4.22<br>(3.86, 4.58)    |
| Kingdom of Belgium                    | 1089 (678,1667)        | 0.79<br>(0.68, 0.89)  | 2352 (1078,4947)    | 0.74<br>(0.54, 0.95)  | 10062 (6107,15187)        | 0.15<br>(0.08, 0.21)   | 31290<br>(21965,42633)    | 0.05<br>(0, 0.1)        |
| Kingdom of Bhutan                     | 69 (42,106)            | 3.44<br>(3.19, 3.7)   | 148 (69,305)        | 2.83<br>(2.76, 2.9)   | 338 (210,526)             | 1.87<br>(1.75, 1.99)   | 2534 (1748,3500)          | 1.76<br>(1.64, 1.87)    |
| Kingdom of                            | 421 (254,672)          | 3.32                  | 2362 (1117,4887)    | 3.12                  | 11524 (7127,17227)        | 2.26                   | 35667                     | 1.95                    |

|                                  |                  |                         |                    |                      |                     |                         |                          |                         |
|----------------------------------|------------------|-------------------------|--------------------|----------------------|---------------------|-------------------------|--------------------------|-------------------------|
| Cambodia                         |                  | (3.28, 3.35)            |                    | (2.93, 3.3)          |                     | (2.18, 2.34)            | (24553,48855)            | (1.86, 2.03)            |
| Kingdom of Denmark               | 539 (326,816)    | 1.12<br>(1.01, 1.24)    | 1143 (532,2369)    | 0.2<br>(0.09, 0.31)  | 6207 (3808,9177)    | 0.02<br>(-0.06, 0.11)   | 17635<br>(12055,24939)   | -0.8<br>(-0.91, -0.68)  |
| Kingdom of Eswatini              | 80 (49,120)      | 1.82<br>(1.68, 1.95)    | 152 (71,307)       | 2.06<br>(1.84, 2.27) | 1071 (663,1561)     | 1.48<br>(1.34, 1.62)    | 1860 (1287,2495)         | 1.36<br>(1.22, 1.5)     |
| Kingdom of Lesotho               | 107 (67,164)     | 1.03<br>(0.87, 1.19)    | 229 (107,462)      | 0.78<br>(0.62, 0.94) | 1694 (1046,2479)    | 0.59<br>(0.51, 0.68)    | 3145 (2156,4229)         | 0.42<br>(0.32, 0.52)    |
| Kingdom of Morocco               | 2316 (1454,3568) | 3.17<br>(3.13, 3.2)     | 6534 (3047,13626)  | 2.92<br>(2.81, 3.03) | 56706 (35404,86401) | 1.87<br>(1.73, 2)       | 131875<br>(91391,179901) | 1.54<br>(1.3, 1.79)     |
| Kingdom of Norway                | 568 (352,853)    | 0.92<br>(0.79, 1.06)    | 1104 (510,2281)    | 1.24<br>(1.11, 1.37) | 4268 (2695,6517)    | 0.11<br>(-0.14, 0.36)   | 14393<br>(10063,19551)   | 0.35<br>(0.27, 0.42)    |
| Kingdom of Saudi Arabia          | 3131 (1954,4775) | 6.54<br>(6.33, 6.76)    | 8183 (3793,16577)  | 5.77<br>(5.59, 5.95) | 62458 (38758,95989) | 4.69<br>(4.6, 4.79)     | 124125<br>(85850,169991) | 4.38<br>(4.28, 4.47)    |
| Kingdom of Spain                 | 3830 (2507,5420) | 1.49<br>(1.22, 1.76)    | 12028 (5619,24849) | 2.29<br>(2.05, 2.53) | 36560 (22523,55179) | -1.34<br>(-2.12, -0.55) | 106517<br>(73582,144185) | 0.76<br>(0.6, 0.93)     |
| Kingdom of Sweden                | 971 (619,1449)   | -0.18<br>(-0.31, -0.06) | 1609 (733,3262)    | 0.79<br>(0.56, 1.02) | 9719 (5984,14587)   | 0.29<br>(0.21, 0.38)    | 19985<br>(13696,27391)   | 1.24<br>(0.95, 1.54)    |
| Kingdom of Thailand              | 2499 (1396,3934) | 2.32<br>(1.99, 2.64)    | 16743 (7990,33661) | 2.87<br>(2.54, 3.21) | 49282 (29936,73934) | 0.78<br>(0.53, 1.02)    | 122628<br>(85222,168173) | 0.91<br>(0.75, 1.08)    |
| Kingdom of the Netherlands       | 1775 (1094,2733) | 0.47<br>(0.26, 0.67)    | 3474 (1661,6973)   | 0.38<br>(0.2, 0.56)  | 13467 (8198,20607)  | -0.24<br>(-0.36, -0.13) | 39858<br>(28032,53834)   | -0.37<br>(-0.43, -0.31) |
| Kingdom of Tonga                 | 3 (2,5)          | 1.49<br>(1.41, 1.57)    | 20 (10,41)         | 1.58<br>(1.51, 1.66) | 68 (42,101)         | 0.75<br>(0.69, 0.81)    | 198 (136,269)            | 0.56<br>(0.49, 0.63)    |
| Kyrgyz Republic                  | 1028 (639,1546)  | 3.18<br>(3.08, 3.28)    | 1087 (493,2251)    | 3.5<br>(3.16, 3.85)  | 5280 (3215,8019)    | 1.85<br>(1.73, 1.96)    | 18916<br>(13195,26053)   | 1.74<br>(1.61, 1.88)    |
| Lao People's Democratic Republic | 190 (116,299)    | 3.73<br>(3.68, 3.77)    | 1045 (488,2200)    | 3.6<br>(3.54, 3.66)  | 4979 (3034,7511)    | 2.71<br>(2.66, 2.76)    | 14449 (9931,20072)       | 2.54<br>(2.51, 2.58)    |
| Lebanese Republic                | 686 (433,1022)   | 4.16                    | 1111 (524,2248)    | 3.64                 | 9046 (5636,13840)   | 2.78                    | 17672                    | 2.69                    |

|                                         |                          |                       |                           |                      |                             |                         |                              |                         |
|-----------------------------------------|--------------------------|-----------------------|---------------------------|----------------------|-----------------------------|-------------------------|------------------------------|-------------------------|
|                                         |                          | (3.89, 4.44)          |                           | (3.57, 3.71)         |                             | (2.65, 2.91)            | (12280,24025)                | (2.53, 2.85)            |
| Malaysia                                | 603 (347,940)            | 3.04<br>(2.78, 3.3)   | 5924 (2824,12282)         | 3.06<br>(2.72, 3.4)  | 21881 (13428,32581)         | 2.28<br>(2.03, 2.54)    | 62138<br>(41685,84767)       | 1.99<br>(1.8, 2.17)     |
| Mongolia                                | 231 (136,349)            | 4.1<br>(3.95, 4.25)   | 681 (312,1414)            | 4.98<br>(4.7, 5.26)  | 2688 (1639,4048)            | 2.16<br>(1.99, 2.34)    | 9611 (6681,13085)            | 2.13<br>(1.95, 2.31)    |
| Montenegro                              | 38 (23,57)               | 0.82<br>(0.76, 0.87)  | 136 (62,282)              | 0.83<br>(0.59, 1.06) | 472 (288,713)               | -0.13<br>(-0.24, -0.03) | 2526 (1742,3450)             | -0.06<br>(-0.15, 0.04)  |
| New Zealand                             | 615 (381,936)            | 1.5<br>(1.27, 1.74)   | 1082 (501,2241)           | 1.83<br>(1.56, 2.09) | 1343 (797,2121)             | 0.63<br>(0.01, 1.26)    | 24768<br>(17258,33547)       | 0.81<br>(0.73, 0.88)    |
| North Macedonia                         | 133 (78,208)             | 1.74<br>(1.67, 1.81)  | 472 (211,970)             | 1.46<br>(1.33, 1.58) | 1758 (1071,2662)            | 0.45<br>(0.38, 0.52)    | 8593 (5815,11740)            | 0.46<br>(0.4, 0.52)     |
| Northern Mariana Islands                | 2 (1,3)                  | -0.6<br>(-1.52, 0.34) | 15 (7,31)                 | 1.71<br>(0.72, 2.71) | 36 (22,54)                  | -0.73<br>(-1.58, 0.13)  | 100 (69,141)                 | -0.97<br>(-1.81, -0.12) |
| Palestine                               | 314 (193,460)            | 5.06<br>(5.01, 5.11)  | 674 (315,1369)            | 5.11<br>(4.95, 5.26) | 6723 (4159,10154)           | 4.03<br>(3.88, 4.17)    | 14574 (9851,20169)           | 3.77<br>(3.6, 3.93)     |
| People's Democratic Republic of Algeria | 2372 (1475,3599)         | 4.51<br>(4.43, 4.59)  | 8406 (3973,17059)         | 4.71<br>(4.54, 4.87) | 68142 (42506,104684)        | 2.96<br>(2.79, 3.12)    | 134716<br>(93153,184119)     | 2.42<br>(2.22, 2.63)    |
| People's Republic of Bangladesh         | 13034 (8253,20018)       | 4.09<br>(3.99, 4.2)   | 33261 (15583,65835)       | 4.07<br>(3.98, 4.16) | 74761 (46344,113505)        | 2.54<br>(2.47, 2.61)    | 571579<br>(392068,781328)    | 2.14<br>(1.99, 2.29)    |
| People's Republic of China              | 139624<br>(89443,206557) | 1.56<br>(1.3, 1.83)   | 394150<br>(184942,797694) | 2.92<br>(2.49, 3.35) | 1080720<br>(662848,1654561) | 0.72<br>(0.52, 0.93)    | 2083393<br>(1455840,2852739) | 0.07<br>(-0.1, 0.25)    |
| Plurinational State of Bolivia          | 1535 (971,2300)          | 4.18<br>(4.12, 4.23)  | 2296 (1057,4653)          | 3.43<br>(3.4, 3.47)  | 10295 (6363,15463)          | 2.54<br>(2.45, 2.62)    | 24279<br>(16813,33202)       | 2.54<br>(2.42, 2.66)    |
| Portuguese Republic                     | 1340 (829,2006)          | 1.61<br>(1.36, 1.87)  | 2608 (1185,5329)          | 1.56<br>(1.28, 1.83) | 10262 (6372,15870)          | 0.13<br>(0, 0.25)       | 32366<br>(22830,43433)       | -0.13<br>(-0.26, 0.01)  |
| Principality of Andorra                 | 8 (5,11)                 | 1.72<br>(1.4, 2.04)   | 24 (11,50)                | 2.76<br>(2.42, 3.11) | 90 (56,138)                 | 1.17<br>(0.87, 1.48)    | 257 (180,349)                | 0.87<br>(0.57, 1.17)    |
| Principality of Monaco                  | 3 (2,4)                  | 0.69<br>(0.55, 0.83)  | 8 (4,16)                  | 0.76<br>(0.55, 0.97) | 31 (19,48)                  | 0.29<br>(0.19, 0.4)     | 89 (63,122)                  | 0.17<br>(0.08, 0.27)    |

|                        |                  |                        |                  |                         |                     |                         |                        |                         |
|------------------------|------------------|------------------------|------------------|-------------------------|---------------------|-------------------------|------------------------|-------------------------|
| Puerto Rico            | 340 (207,534)    | 0.98<br>(0.69, 1.26)   | 828 (382,1699)   | 0.17<br>(-0.07, 0.42)   | 2637 (1615,3990)    | -0.69<br>(-0.87, -0.5)  | 6572 (4524,9011)       | -0.68<br>(-0.87, -0.49) |
| Republic of Albania    | 164 (101,246)    | 1.02<br>(0.84, 1.19)   | 414 (195,855)    | 1.32<br>(0.93, 1.71)    | 1957 (1201,2962)    | -0.75<br>(-0.89, -0.62) | 10775 (7493,14800)     | -0.72<br>(-0.88, -0.57) |
| Republic of Angola     | 926 (539,1424)   | 4.85<br>(4.8, 4.91)    | 4008 (1815,8222) | 4.44<br>(4.37, 4.5)     | 25685 (15944,37863) | 4.07<br>(4.04, 4.1)     | 61801<br>(42818,85075) | 3.82<br>(3.75, 3.88)    |
| Republic of Armenia    | 183 (110,281)    | 1.15<br>(0.99, 1.32)   | 582 (265,1198)   | 1.23<br>(0.63, 1.84)    | 2412 (1490,3664)    | -0.39<br>(-0.6, -0.18)  | 9530 (6619,13152)      | -0.35<br>(-0.58, -0.12) |
| Republic of Austria    | 957 (568,1480)   | 0.88<br>(0.65, 1.11)   | 1923 (885,3948)  | 1.21<br>(0.95, 1.47)    | 10525 (6507,15673)  | 0.15<br>(-0.15, 0.44)   | 20793<br>(14492,28251) | 0.18<br>(0.08, 0.28)    |
| Republic of Azerbaijan | 483 (291,759)    | 2.86<br>(2.75, 2.97)   | 2045 (939,4183)  | 3.86<br>(3.31, 4.41)    | 8778 (5400,13376)   | 1.68<br>(1.46, 1.89)    | 32088<br>(22128,43829) | 1.88<br>(1.63, 2.13)    |
| Republic of Belarus    | 569 (338,881)    | 1.15<br>(1.05, 1.26)   | 2504 (1143,5196) | 0.89<br>(0.48, 1.3)     | 7148 (4384,10799)   | -0.42<br>(-0.61, -0.23) | 30721<br>(21665,41687) | -0.42<br>(-0.62, -0.22) |
| Republic of Benin      | 307 (188,476)    | 4.5<br>(4.44, 4.57)    | 1433 (685,2914)  | 4.47<br>(4.42, 4.52)    | 13359 (8227,19852)  | 3.61<br>(3.6, 3.62)     | 24138<br>(16681,33333) | 3.46<br>(3.43, 3.49)    |
| Republic of Botswana   | 175 (108,269)    | 4.05<br>(3.95, 4.14)   | 422 (197,845)    | 3.98<br>(3.85, 4.12)    | 2519 (1572,3681)    | 2.8<br>(2.71, 2.88)     | 4769 (3274,6450)       | 2.72<br>(2.63, 2.82)    |
| Republic of Bulgaria   | 379 (235,588)    | -0.23<br>(-0.36, -0.1) | 1582 (722,3317)  | -0.28<br>(-0.37, -0.19) | 4860 (2976,7366)    | -1.03<br>(-1.1, -0.96)  | 25148<br>(17346,35378) | -1.09<br>(-1.15, -1.03) |
| Republic of Burundi    | 238 (138,391)    | 3.31<br>(3.09, 3.54)   | 996 (462,2074)   | 2.79<br>(2.69, 2.89)    | 7167 (4354,10844)   | 3.04<br>(2.85, 3.23)    | 25358<br>(17667,34823) | 2.93<br>(2.74, 3.12)    |
| Republic of Cabo Verde | 18 (11,30)       | 3.83<br>(3.75, 3.92)   | 84 (40,172)      | 4.13<br>(3.74, 4.53)    | 693 (429,1035)      | 2.58<br>(2.37, 2.78)    | 1132 (773,1565)        | 2.3<br>(2.07, 2.53)     |
| Republic of Cameroon   | 855 (505,1297)   | 4.72<br>(4.6, 4.85)    | 3469 (1659,7185) | 4.5<br>(4.44, 4.56)     | 32675 (20135,48296) | 4.06<br>(4.04, 4.08)    | 61252<br>(41324,83858) | 3.86<br>(3.8, 3.92)     |
| Republic of Chad       | 274 (171,432)    | 3.9<br>(3.73, 4.06)    | 1288 (615,2661)  | 3.38<br>(3.27, 3.5)     | 15403 (9512,22601)  | 3.37<br>(3.3, 3.43)     | 31241<br>(21404,42475) | 3.13<br>(3.06, 3.2)     |
| Republic of Chile      | 3033 (1866,4688) | 3.03                   | 4379 (2011,9031) | 2.3                     | 13507 (8481,20682)  | 1.09                    | 76028                  | 1.02                    |

|                               |                  |                      |                    |                        |                     |                         |                           |                         |
|-------------------------------|------------------|----------------------|--------------------|------------------------|---------------------|-------------------------|---------------------------|-------------------------|
|                               |                  | (2.76, 3.3)          |                    | (1.99, 2.6)            |                     | (0.97, 1.21)            | (52283,102293)            | (0.87, 1.16)            |
| Republic of Colombia          | 5830 (3590,8754) | 3.15<br>(2.82, 3.49) | 10389 (4883,21192) | 3.01<br>(2.7, 3.32)    | 44628 (27659,67454) | 1.45<br>(1.32, 1.58)    | 174976<br>(121776,239913) | 1.46<br>(1.32, 1.61)    |
| Republic of Costa Rica        | 749 (430,1136)   | 3.57<br>(3.25, 3.9)  | 1055 (481,2122)    | 3.19<br>(2.8, 3.59)    | 4444 (2751,6673)    | 1.82<br>(1.62, 2.02)    | 15661<br>(10950,21467)    | 1.64<br>(1.44, 1.83)    |
| Republic of Croatia           | 401 (240,616)    | 0.53<br>(0.46, 0.61) | 871 (402,1793)     | 0.01<br>(-0.16, 0.19)  | 2989 (1835,4604)    | -0.86<br>(-0.91, -0.81) | 15078<br>(10451,20733)    | -1.05<br>(-1.13, -0.98) |
| Republic of Cuba              | 1201 (754,1835)  | 1.35<br>(0.99, 1.72) | 2565 (1189,5204)   | 1.77<br>(1.39, 2.16)   | 8885 (5536,13598)   | -0.28<br>(-0.47, -0.08) | 20771<br>(14834,27621)    | -0.28<br>(-0.49, -0.07) |
| Republic of Cyprus            | 191 (118,292)    | 3.3<br>(3.15, 3.46)  | 341 (160,705)      | 3<br>(2.96, 3.04)      | 1551 (958,2403)     | 2.36<br>(2.32, 2.4)     | 4500 (3099,6084)          | 2.22<br>(2.17, 2.28)    |
| Republic of Côte d'Ivoire     | 663 (390,1005)   | 3.81<br>(3.77, 3.84) | 2948 (1413,5971)   | 3.71<br>(3.62, 3.79)   | 28439 (17404,41659) | 3.03<br>(2.91, 3.14)    | 53443<br>(36305,72610)    | 2.9<br>(2.75, 3.06)     |
| Republic of Djibouti          | 33 (19,53)       | 5.41<br>(5.29, 5.54) | 187 (87,380)       | 5.87<br>(5.72, 6.02)   | 863 (519,1320)      | 4.54<br>(4.44, 4.63)    | 2602 (1791,3578)          | 4.15<br>(4.05, 4.26)    |
| Republic of Ecuador           | 2411 (1512,3609) | 3.89<br>(3.76, 4.02) | 3962 (1856,8027)   | 3.56<br>(3.42, 3.7)    | 15785 (9679,23752)  | 2.21<br>(2.15, 2.27)    | 31633<br>(22090,42856)    | 1.88<br>(1.76, 2.01)    |
| Republic of El Salvador       | 469 (297,694)    | 2.9<br>(2.73, 3.07)  | 1348 (632,2706)    | 2.63<br>(2.55, 2.72)   | 5963 (3664,8949)    | 1.23<br>(1.18, 1.28)    | 21096<br>(14838,28937)    | 1.25<br>(1.21, 1.3)     |
| Republic of Equatorial Guinea | 61 (35,94)       | 6.72<br>(6.54, 6.91) | 183 (87,374)       | 5.69<br>(5.58, 5.81)   | 1225 (760,1805)     | 4.45<br>(4.4, 4.5)      | 2881 (1984,3989)          | 4.26<br>(4.21, 4.32)    |
| Republic of Estonia           | 196 (118,299)    | 0.62<br>(0.49, 0.75) | 343 (156,704)      | 0.02<br>(-0.14, 0.18)  | 928 (567,1397)      | -0.84<br>(-0.88, -0.79) | 3920 (2694,5309)          | -0.75<br>(-0.8, -0.7)   |
| Republic of Fiji              | 22 (14,35)       | 1.55<br>(1.51, 1.58) | 205 (96,426)       | 1.79<br>(1.54, 2.04)   | 647 (405,963)       | 0.78<br>(0.65, 0.91)    | 1774 (1197,2416)          | 0.6<br>(0.49, 0.72)     |
| Republic of Finland           | 673 (418,1033)   | 0.37<br>(0.27, 0.46) | 1042 (492,2138)    | -0.44<br>(-0.59, -0.3) | 4198 (2561,6254)    | -0.4<br>(-0.44, -0.37)  | 11890 (8206,16117)        | -0.55<br>(-0.6, -0.51)  |
| Republic of Ghana             | 932 (549,1414)   | 4.6<br>(4.48, 4.72)  | 4919 (2255,9948)   | 3.8<br>(3.69, 3.92)    | 40206 (24460,58856) | 3.39<br>(3.37, 3.41)    | 58178<br>(40722,79114)    | 3.11<br>(3.08, 3.13)    |

|                           |                         |                      |                           |                      |                            |                       |                              |                         |
|---------------------------|-------------------------|----------------------|---------------------------|----------------------|----------------------------|-----------------------|------------------------------|-------------------------|
| Republic of Guatemala     | 1341 (804,1983)         | 4.84<br>(4.66, 5.01) | 2541 (1185,5179)          | 3.73<br>(3.66, 3.8)  | 14065 (8571,21132)         | 3.05<br>(2.98, 3.12)  | 56029<br>(38906,76812)       | 2.88<br>(2.78, 2.99)    |
| Republic of Guinea        | 276 (164,423)           | 3.18<br>(3, 3.36)    | 1241 (572,2552)           | 2.65<br>(2.52, 2.78) | 13795 (8531,20260)         | 2.67<br>(2.58, 2.77)  | 25629<br>(17521,34443)       | 2.64<br>(2.57, 2.71)    |
| Republic of Guinea-Bissau | 45 (27,70)              | 3.42<br>(3.25, 3.58) | 204 (98,411)              | 2.95<br>(2.81, 3.1)  | 2206 (1352,3241)           | 2.8<br>(2.73, 2.87)   | 3838 (2648,5218)             | 2.71<br>(2.68, 2.75)    |
| Republic of Guyana        | 35 (22,53)              | 1.05<br>(0.96, 1.15) | 145 (67,302)              | 1.53<br>(1.3, 1.75)  | 666 (415,992)              | 0.03<br>(-0.03, 0.08) | 1645 (1146,2209)             | 0.03<br>(-0.01, 0.08)   |
| Republic of Haiti         | 670 (393,990)           | 3.69<br>(3.59, 3.79) | 1904 (907,3872)           | 3.61<br>(3.55, 3.68) | 11476 (7074,17086)         | 2.94<br>(2.87, 3.02)  | 28447<br>(19655,38756)       | 2.88<br>(2.79, 2.97)    |
| Republic of Honduras      | 1621 (1025,2365)        | 4.85<br>(4.74, 4.96) | 1660 (774,3407)           | 4.25<br>(4.21, 4.29) | 9149 (5608,13954)          | 3.47<br>(3.43, 3.5)   | 33018<br>(23138,45426)       | 3.44<br>(3.4, 3.49)     |
| Republic of Iceland       | 38 (23,57)              | 1.5<br>(1.37, 1.63)  | 81 (37,161)               | 1.92<br>(1.68, 2.17) | 325 (200,495)              | 0.8<br>(0.7, 0.89)    | 1007 (707,1354)              | 0.52<br>(0.45, 0.6)     |
| Republic of India         | 98206<br>(61713,147871) | 3.35<br>(3.24, 3.46) | 291407<br>(136668,585537) | 3.51<br>(3.32, 3.69) | 730808<br>(450268,1121547) | 2.04<br>(1.46, 2.63)  | 3426916<br>(2402766,4645655) | 1.7<br>(1.59, 1.82)     |
| Republic of Indonesia     | 4337 (2673,6567)        | 2.4<br>(2.36, 2.44)  | 51371 (23964,103144)      | 3.47<br>(3.4, 3.54)  | 240482<br>(148254,370146)  | 1.95<br>(1.88, 2.03)  | 684340<br>(471237,932469)    | 1.83<br>(1.75, 1.91)    |
| Republic of Iraq          | 2754 (1777,4031)        | 4.66<br>(4.56, 4.75) | 6196 (2929,12539)         | 4.5<br>(4.46, 4.54)  | 56973 (35705,85748)        | 3.55<br>(3.45, 3.64)  | 119998<br>(83693,164675)     | 3.24<br>(3.13, 3.35)    |
| Republic of Italy         | 4679 (2904,7039)        | 0.35<br>(0.18, 0.52) | 13353 (6103,27152)        | 1.27<br>(1.07, 1.46) | 59225 (36125,90257)        | 0.04<br>(-0.09, 0.17) | 159419<br>(111296,218741)    | -0.28<br>(-0.39, -0.18) |
| Republic of Kazakhstan    | 1037 (585,1631)         | 2.14<br>(1.88, 2.4)  | 4089 (1837,8555)          | 2.26<br>(2.04, 2.47) | 15143 (9435,22752)         | 0.8<br>(0.76, 0.85)   | 57827<br>(39923,78617)       | 0.86<br>(0.81, 0.92)    |
| Republic of Kenya         | 1160 (714,1775)         | 3.89<br>(3.83, 3.95) | 5830 (2627,11827)         | 4.21<br>(4.18, 4.24) | 36303 (22586,55236)        | 3.33<br>(3.27, 3.39)  | 122722<br>(84265,168482)     | 3.07<br>(2.97, 3.18)    |
| Republic of Kiribati      | 3 (2,4)                 | 2.47<br>(2.41, 2.54) | 23 (11,47)                | 2.71<br>(2.44, 2.97) | 86 (53,131)                | 2.05<br>(1.97, 2.14)  | 252 (171,342)                | 2.2<br>(2.09, 2.32)     |
| Republic of Korea         | 4723 (2991,6953)        | 1.55                 | 17412 (7872,35307)        | 2.29                 | 33629 (20510,51517)        | 0.16                  | 170796                       | -0.1                    |

|                        |                |                         |                  |                         |                     |                         |                        |                         |
|------------------------|----------------|-------------------------|------------------|-------------------------|---------------------|-------------------------|------------------------|-------------------------|
|                        |                | (1.28, 1.82)            |                  | (1.86, 2.72)            |                     | (0.02, 0.29)            | (120217,235230)        | (-0.26, 0.05)           |
| Republic of Latvia     | 231 (139,345)  | -0.28<br>(-0.38, -0.19) | 483 (224,1006)   | -0.35<br>(-0.56, -0.14) | 1309 (807,1959)     | -1.45<br>(-1.59, -1.31) | 5489 (3831,7568)       | -1.49<br>(-1.62, -1.35) |
| Republic of Liberia    | 146 (88,227)   | 5.04<br>(4.7, 5.38)     | 685 (326,1440)   | 4.71<br>(4.45, 4.96)    | 5942 (3686,8694)    | 4.03<br>(3.83, 4.23)    | 10362 (7204,13886)     | 3.9<br>(3.7, 4.1)       |
| Republic of Lithuania  | 398 (250,609)  | -0.53<br>(-0.84, -0.23) | 674 (311,1384)   | 0.03<br>(-0.29, 0.35)   | 1901 (1175,2877)    | -1.39<br>(-1.58, -1.21) | 7792 (5368,10783)      | -1.46<br>(-1.66, -1.27) |
| Republic of Madagascar | 577 (329,905)  | 3.86<br>(3.82, 3.9)     | 2600 (1222,5367) | 3.94<br>(3.9, 3.98)     | 17126 (10342,25898) | 3.43<br>(3.41, 3.45)    | 58681<br>(40491,80548) | 3.03<br>(3, 3.07)       |
| Republic of Malawi     | 438 (264,674)  | 3.22<br>(2.94, 3.51)    | 1724 (818,3561)  | 2.91<br>(2.59, 3.23)    | 11231 (6843,17053)  | 2.66<br>(2.43, 2.89)    | 38733<br>(26168,53286) | 2.55<br>(2.34, 2.76)    |
| Republic of Maldives   | 20 (11,33)     | 4.89<br>(4.38, 5.39)    | 87 (40,175)      | 5.53<br>(5.34, 5.72)    | 316 (191,482)       | 3.92<br>(3.78, 4.06)    | 838 (571,1146)         | 3.61<br>(3.46, 3.75)    |
| Republic of Mali       | 425 (257,663)  | 4.13<br>(3.94, 4.33)    | 1946 (930,3959)  | 3.41<br>(3.29, 3.53)    | 21744 (13298,31983) | 3.35<br>(3.23, 3.47)    | 36218<br>(24822,49811) | 3.51<br>(3.38, 3.64)    |
| Republic of Malta      | 40 (25,63)     | 0.59<br>(0.51, 0.67)    | 95 (44,194)      | 0.01<br>(-0.17, 0.19)   | 404 (251,622)       | -0.06<br>(-0.1, -0.01)  | 1277 (892,1748)        | -0.13<br>(-0.19, -0.07) |
| Republic of Mauritius  | 45 (25,72)     | 1.78<br>(1.52, 2.04)    | 287 (136,589)    | 1.77<br>(1.36, 2.19)    | 887 (546,1337)      | 0.44<br>(0.21, 0.67)    | 2530 (1753,3490)       | 0.19<br>(-0.06, 0.44)   |
| Republic of Moldova    | 255 (154,399)  | 0.78<br>(0.67, 0.89)    | 902 (412,1900)   | 0.61<br>(0.31, 0.92)    | 2968 (1814,4503)    | -0.65<br>(-0.79, -0.5)  | 12566 (8706,17213)     | -0.76<br>(-0.94, -0.59) |
| Republic of Mozambique | 605 (368,937)  | 3.19<br>(3.1, 3.28)     | 2632 (1235,5348) | 2.84<br>(2.71, 2.97)    | 16834 (10327,25447) | 2.67<br>(2.62, 2.72)    | 62018<br>(43381,84547) | 2.67<br>(2.61, 2.72)    |
| Republic of Namibia    | 134 (79,205)   | 3.03<br>(2.98, 3.08)    | 328 (154,663)    | 3.32<br>(3.23, 3.42)    | 2340 (1460,3438)    | 2.37<br>(2.27, 2.47)    | 4603 (3136,6267)       | 2.39<br>(2.32, 2.46)    |
| Republic of Nauru      | 0 (0,1)        | 0.95<br>(0.77, 1.14)    | 2 (1,4)          | 0.82<br>(0.61, 1.03)    | 8 (5,11)            | 0.33<br>(0.21, 0.46)    | 22 (16,30)             | 0.37<br>(0.25, 0.48)    |
| Republic of Nicaragua  | 680 (418,1009) | 4.07<br>(3.87, 4.26)    | 1203 (575,2469)  | 4.02<br>(3.86, 4.19)    | 6022 (3745,9015)    | 2.53<br>(2.41, 2.66)    | 21815<br>(14948,29768) | 2.48<br>(2.36, 2.59)    |

|                          |                    |                       |                   |                        |                     |                         |                           |                         |
|--------------------------|--------------------|-----------------------|-------------------|------------------------|---------------------|-------------------------|---------------------------|-------------------------|
| Republic of Niue         | 0 (0,0)            | 0.15<br>(-0.14, 0.43) | 0 (0,1)           | -0.08<br>(-0.31, 0.15) | 1 (1,2)             | -0.91<br>(-1.18, -0.64) | 3 (2,4)                   | -0.96<br>(-1.22, -0.69) |
| Republic of Palau        | 1 (0,1)            | 0.74<br>(0.31, 1.18)  | 5 (2,11)          | 1.75<br>(1.3, 2.19)    | 12 (7,19)           | -0.07<br>(-0.45, 0.3)   | 33 (23,45)                | -0.21<br>(-0.58, 0.17)  |
| Republic of Panama       | 372 (227,576)      | 3.29<br>(3.16, 3.42)  | 842 (398,1712)    | 3.45<br>(3.31, 3.59)   | 3598 (2221,5451)    | 1.96<br>(1.89, 2.03)    | 12697 (8733,17421)        | 1.91<br>(1.83, 1.99)    |
| Republic of Paraguay     | 1108 (713,1656)    | 4.05<br>(3.9, 4.21)   | 1288 (590,2595)   | 3<br>(2.91, 3.09)      | 6245 (3804,9657)    | 2.44<br>(2.37, 2.51)    | 20892<br>(14375,28610)    | 2.51<br>(2.34, 2.69)    |
| Republic of Peru         | 10914 (7088,15845) | 4.08<br>(3.96, 4.19)  | 8295 (3860,17032) | 3.31<br>(3.27, 3.34)   | 32714 (20194,49268) | 2.06<br>(2.04, 2.09)    | 72609<br>(49575,99584)    | 2.22<br>(2.19, 2.24)    |
| Republic of Poland       | 4449 (2768,6776)   | 0<br>(-0.14, 0.15)    | 8467 (3860,17713) | 0.51<br>(0.17, 0.85)   | 34626 (21253,52934) | -0.17<br>(-0.27, -0.06) | 160522<br>(111864,219001) | -0.39<br>(-0.51, -0.28) |
| Republic of Rwanda       | 350 (210,542)      | 3.83<br>(3.53, 4.13)  | 1371 (656,2808)   | 3.58<br>(3.33, 3.82)   | 8541 (5217,12730)   | 3.05<br>(2.8, 3.3)      | 31334<br>(21804,42712)    | 2.84<br>(2.59, 3.09)    |
| Republic of San Marino   | 2 (2,4)            | 1.42<br>(1.22, 1.62)  | 8 (4,17)          | 2.47<br>(2.19, 2.75)   | 31 (19,48)          | 0.98<br>(0.75, 1.2)     | 90 (62,122)               | 0.66<br>(0.46, 0.87)    |
| Republic of Senegal      | 367 (209,569)      | 3.42<br>(3.37, 3.46)  | 1752 (829,3547)   | 3.37<br>(3.28, 3.46)   | 16502 (10258,24367) | 2.79<br>(2.71, 2.87)    | 26594<br>(18351,35489)    | 2.63<br>(2.53, 2.73)    |
| Republic of Serbia       | 595 (348,921)      | 0.91<br>(0.65, 1.17)  | 1821 (833,3799)   | 0.38<br>(0.23, 0.53)   | 6697 (4127,10191)   | -0.52<br>(-0.62, -0.43) | 36524<br>(25631,49957)    | -0.51<br>(-0.61, -0.41) |
| Republic of Seychelles   | 3 (2,4)            | 2.64<br>(2.38, 2.89)  | 23 (11,48)        | 3.87<br>(3.4, 4.34)    | 69 (42,104)         | 1.75<br>(1.47, 2.04)    | 184 (124,255)             | 1.46<br>(1.2, 1.72)     |
| Republic of Sierra Leone | 191 (111,302)      | 3.46<br>(3.18, 3.75)  | 875 (415,1785)    | 3.41<br>(3.23, 3.59)   | 9337 (5755,13781)   | 2.92<br>(2.73, 3.1)     | 16572<br>(11371,22213)    | 2.73<br>(2.56, 2.91)    |
| Republic of Singapore    | 464 (273,724)      | 3.04<br>(2.84, 3.25)  | 2031 (934,4209)   | 2.73<br>(2.52, 2.95)   | 4291 (2614,6610)    | 1.83<br>(1.66, 2)       | 18023<br>(12425,24405)    | 1.61<br>(1.47, 1.74)    |
| Republic of Slovenia     | 199 (123,315)      | 1.14<br>(1.02, 1.27)  | 460 (214,941)     | 0.72<br>(0.47, 0.97)   | 1431 (874,2178)     | -0.35<br>(-0.47, -0.22) | 7067 (4880,9680)          | -0.36<br>(-0.48, -0.24) |
| Republic of South        | 7450 (4956,10782)  | 1.22                  | 9722 (4438,19921) | 2.63                   | 66583 (42138,98361) | 1.73                    | 109566                    | 1.43                    |

|                                  |                    |                      |                    |                      |                          |                      |                           |                      |
|----------------------------------|--------------------|----------------------|--------------------|----------------------|--------------------------|----------------------|---------------------------|----------------------|
| Africa                           |                    | (1.03, 1.42)         |                    | (2.37, 2.88)         |                          | (1.57, 1.89)         | (75997,148876)            | (1.29, 1.57)         |
| Republic of South Sudan          | 209 (125,332)      | 3.06<br>(2.89, 3.24) | 945 (451,1945)     | 3.29<br>(3.16, 3.43) | 5574 (3390,8396)         | 2.44<br>(2.24, 2.64) | 18622<br>(13059,25436)    | 2.18<br>(1.96, 2.41) |
| Republic of Sudan                | 2110 (1311,3146)   | 4.54<br>(4.37, 4.7)  | 5255 (2527,10968)  | 4.08<br>(3.9, 4.27)  | 58613 (36677,88822)      | 3.03<br>(2.99, 3.07) | 129684<br>(88805,176261)  | 2.91<br>(2.9, 2.93)  |
| Republic of Suriname             | 25 (16,37)         | 2.82<br>(2.65, 3)    | 127 (61,260)       | 3.15<br>(2.83, 3.47) | 491 (305,736)            | 1.76<br>(1.53, 1.99) | 1243 (875,1688)           | 1.87<br>(1.63, 2.12) |
| Republic of Tajikistan           | 711 (452,1102)     | 3.61<br>(3.5, 3.71)  | 1256 (579,2612)    | 4.7<br>(4.4, 5)      | 7614 (4589,11404)        | 2.86<br>(2.78, 2.94) | 25488<br>(17954,34276)    | 2.78<br>(2.68, 2.88) |
| Republic of the Congo            | 264 (156,411)      | 4.59<br>(4.51, 4.67) | 859 (395,1779)     | 4.48<br>(4.39, 4.56) | 5125 (3186,7529)         | 3.5<br>(3.45, 3.54)  | 11659 (7968,15961)        | 3.35<br>(3.29, 3.41) |
| Republic of the Gambia           | 56 (32,84)         | 4.08<br>(4.04, 4.12) | 260 (118,522)      | 4.22<br>(4.11, 4.33) | 2499 (1546,3664)         | 3.28<br>(3.23, 3.33) | 4234 (2945,5814)          | 3.12<br>(3.04, 3.2)  |
| Republic of the Marshall Islands | 2 (1,3)            | 2.53<br>(2.41, 2.66) | 12 (6,25)          | 2.93<br>(2.66, 3.2)  | 41 (26,61)               | 1.63<br>(1.47, 1.8)  | 110 (76,151)              | 1.44<br>(1.27, 1.61) |
| Republic of the Niger            | 374 (221,581)      | 4.05<br>(3.99, 4.12) | 1718 (821,3474)    | 3.75<br>(3.65, 3.84) | 20800 (12755,30790)      | 3.52<br>(3.49, 3.54) | 38699<br>(26554,52323)    | 3.67<br>(3.63, 3.71) |
| Republic of the Philippines      | 3681 (2305,5577)   | 2.28<br>(2.14, 2.43) | 15466 (7249,31257) | 3.32<br>(3.15, 3.5)  | 85997 (53347,131074)     | 2.35<br>(2.26, 2.44) | 241272<br>(167057,334070) | 2.01<br>(1.95, 2.08) |
| Republic of the Union of Myanmar | 1560 (923,2414)    | 2.74<br>(2.64, 2.83) | 9896 (4646,20202)  | 3.19<br>(3, 3.38)    | 39701 (24841,59862)      | 1.58<br>(1.43, 1.73) | 98386<br>(68931,134600)   | 1.41<br>(1.28, 1.55) |
| Republic of Trinidad and Tobago  | 153 (97,235)       | 1.99<br>(1.76, 2.22) | 326 (153,671)      | 1.63<br>(1.3, 1.97)  | 1188 (729,1799)          | 0.51<br>(0.34, 0.69) | 3038 (2128,4179)          | 0.52<br>(0.34, 0.7)  |
| Republic of Tunisia              | 836 (503,1255)     | 3.25<br>(3.16, 3.35) | 2502 (1175,5089)   | 3.58<br>(3.31, 3.85) | 19275 (12103,29583)      | 2<br>(1.8, 2.2)      | 39994<br>(27804,54047)    | 1.66<br>(1.47, 1.85) |
| Republic of Turkey               | 10245 (6432,14809) | 3.29<br>(3.23, 3.35) | 17896 (8428,36119) | 3.46<br>(3.38, 3.55) | 133352<br>(83451,206631) | 1.88<br>(1.77, 1.98) | 259609<br>(180703,351232) | 1.71<br>(1.62, 1.79) |
| Republic of Uganda               | 853 (501,1349)     | 4.18<br>(4.07, 4.28) | 3468 (1577,7205)   | 3.95<br>(3.86, 4.03) | 23313 (14569,35616)      | 3.44<br>(3.42, 3.46) | 83139<br>(57745,112330)   | 3.23<br>(3.2, 3.26)  |

|                                  |                        |                      |                     |                      |                          |                         |                           |                         |
|----------------------------------|------------------------|----------------------|---------------------|----------------------|--------------------------|-------------------------|---------------------------|-------------------------|
| Republic of Uzbekistan           | 5844 (3785,8518)       | 3.56<br>(3.41, 3.71) | 6252 (2848,12887)   | 4.33<br>(3.9, 4.75)  | 27827 (17238,42068)      | 2.36<br>(2.17, 2.55)    | 100490<br>(69953,136857)  | 2.43<br>(2.23, 2.63)    |
| Republic of Vanuatu              | 8 (5,13)               | 3.59<br>(3.54, 3.63) | 49 (23,99)          | 3.72<br>(3.61, 3.83) | 207 (129,307)            | 2.85<br>(2.79, 2.91)    | 652 (457,903)             | 2.82<br>(2.73, 2.91)    |
| Republic of Yemen                | 1174 (705,1793)        | 4.82<br>(4.71, 4.92) | 3498 (1664,7066)    | 4.81<br>(4.72, 4.9)  | 42804 (26902,63797)      | 3.91<br>(3.88, 3.94)    | 93997<br>(65838,127931)   | 3.62<br>(3.6, 3.65)     |
| Republic of Zambia               | 462 (267,727)          | 4.15<br>(3.87, 4.44) | 1832 (889,3640)     | 3.68<br>(3.34, 4.03) | 11245 (6777,17034)       | 3.51<br>(3.33, 3.7)     | 35685<br>(25115,47737)    | 3.67<br>(3.51, 3.83)    |
| Republic of Zimbabwe             | 571 (352,847)          | 1.56<br>(1.33, 1.8)  | 1620 (743,3241)     | 1.95<br>(1.68, 2.22) | 13893 (8581,20406)       | 1.71<br>(1.61, 1.82)    | 29580<br>(20221,40623)    | 1.95<br>(1.85, 2.05)    |
| Romania                          | 1090 (663,1645)        | 0.71<br>(0.61, 0.8)  | 3990 (1809,8263)    | 0.45<br>(0.22, 0.67) | 13728 (8395,20713)       | -0.83<br>(-0.98, -0.68) | 75443<br>(51674,103114)   | -1.08<br>(-1.22, -0.93) |
| Russian Federation               | 16847<br>(10843,24215) | 0.65<br>(0.44, 0.87) | 36993 (16802,77371) | 0.54<br>(0.16, 0.92) | 131226<br>(80656,201791) | -0.24<br>(-0.42, -0.05) | 501239<br>(349494,680331) | -0.26<br>(-0.43, -0.09) |
| Saint Kitts and Nevis            | 5 (3,8)                | 3.46<br>(3.07, 3.85) | 15 (7,31)           | 4.02<br>(3.49, 4.55) | 54 (34,83)               | 1.9<br>(1.71, 2.1)      | 135 (91,183)              | 1.9<br>(1.69, 2.1)      |
| Saint Lucia                      | 14 (9,22)              | 3.03<br>(2.67, 3.39) | 44 (20,88)          | 3.75<br>(3.43, 4.07) | 160 (98,243)             | 1.44<br>(1.26, 1.61)    | 409 (285,556)             | 1.39<br>(1.2, 1.57)     |
| Saint Vincent and the Grenadines | 6 (3,9)                | 1.88<br>(1.74, 2.02) | 24 (11,49)          | 2.72<br>(2.44, 3)    | 95 (58,143)              | 0.52<br>(0.42, 0.62)    | 238 (163,325)             | 0.59<br>(0.48, 0.7)     |
| Slovak Republic                  | 367 (223,558)          | 1.17<br>(1.08, 1.26) | 1359 (608,2815)     | 0.68<br>(0.45, 0.91) | 4285 (2616,6454)         | -0.02<br>(-0.13, 0.09)  | 23674<br>(16085,32236)    | -0.13<br>(-0.23, -0.03) |
| Socialist Republic of Viet Nam   | 4515 (2670,7083)       | 3.23<br>(3.07, 3.39) | 17732 (8325,36306)  | 3.9<br>(3.51, 4.29)  | 72568 (44576,109492)     | 2.07<br>(1.84, 2.3)     | 213733<br>(144221,293189) | 2.1<br>(1.88, 2.32)     |
| Solomon Islands                  | 21 (12,32)             | 4.06<br>(3.94, 4.18) | 119 (56,243)        | 4.37<br>(4.33, 4.4)  | 456 (280,686)            | 3.15<br>(3.08, 3.22)    | 1376 (941,1868)           | 3.32<br>(3.25, 3.4)     |
| State of Eritrea                 | 132 (78,215)           | 3.49<br>(3.36, 3.63) | 682 (324,1399)      | 3.58<br>(3.42, 3.74) | 4077 (2486,6135)         | 3.04<br>(2.91, 3.18)    | 12346 (8458,16945)        | 3.07<br>(2.93, 3.22)    |
| State of Israel                  | 807 (506,1231)         | 2.85                 | 1873 (871,3824)     | 2.18                 | 8911 (5521,13654)        | 1.95                    | 27874                     | 1.79                    |

|                            |                  |                      |                    |                      |                     |                        |                           |                         |
|----------------------------|------------------|----------------------|--------------------|----------------------|---------------------|------------------------|---------------------------|-------------------------|
|                            |                  | (2.79, 2.91)         |                    | (1.92, 2.45)         |                     | (1.87, 2.04)           | (19525,37740)             | (1.68, 1.9)             |
| State of Kuwait            | 1313 (853,1903)  | 7.04<br>(6.42, 7.66) | 1374 (653,2804)    | 7.46<br>(6.99, 7.93) | 9702 (5906,14832)   | 5.72<br>(5.25, 6.2)    | 18817<br>(12996,25249)    | 5.33<br>(4.87, 5.8)     |
| State of Libya             | 538 (339,810)    | 4.78<br>(4.53, 5.03) | 1608 (741,3276)    | 5.58<br>(5.43, 5.73) | 12082 (7517,18570)  | 3.7<br>(3.52, 3.89)    | 23958<br>(16509,32830)    | 2.99<br>(2.8, 3.19)     |
| State of Qatar             | 274 (167,421)    | 9.45<br>(8.99, 9.92) | 442 (205,917)      | 7.96<br>(7.76, 8.15) | 3497 (2141,5314)    | 7.35<br>(7.02, 7.68)   | 7031 (4856,9648)          | 7.29<br>(6.94, 7.64)    |
| Sultanate of Oman          | 291 (179,442)    | 6.15<br>(5.95, 6.34) | 703 (327,1446)     | 5<br>(4.68, 5.33)    | 6027 (3746,9186)    | 4.09<br>(3.95, 4.23)   | 11918 (8251,16205)        | 3.69<br>(3.63, 3.75)    |
| Swiss Confederation        | 872 (544,1319)   | 1.16<br>(1.08, 1.24) | 1879 (863,3804)    | 1.07<br>(0.92, 1.22) | 8349 (5126,12902)   | 0.56<br>(0.5, 0.62)    | 26274<br>(18398,35318)    | 0.35<br>(0.17, 0.54)    |
| Syrian Arab Republic       | 972 (602,1480)   | 3.17<br>(2.56, 3.79) | 2899 (1368,5929)   | 4.05<br>(3.66, 4.44) | 22173 (13998,34072) | 2.02<br>(1.42, 2.61)   | 46128<br>(31509,62876)    | 1.45<br>(0.8, 2.09)     |
| Taiwan (Province of China) | 1282 (863,1804)  | 1.09<br>(0.85, 1.33) | 8726 (4015,17839)  | 2.17<br>(1.76, 2.58) | 19276 (13085,26207) | 0.37<br>(0.09, 0.66)   | 54851<br>(39724,71981)    | 0.44<br>(0.23, 0.64)    |
| Togolese Republic          | 204 (117,316)    | 4.09<br>(4.01, 4.17) | 1064 (501,2249)    | 4.25<br>(4.2, 4.3)   | 9598 (5876,14266)   | 3.36<br>(3.32, 3.4)    | 16725<br>(11483,22921)    | 3.05<br>(2.96, 3.15)    |
| Tokelau                    | 0 (0,0)          | 0.78<br>(0.44, 1.13) | 0 (0,1)            | 0.68<br>(0.35, 1)    | 1 (1,1)             | -0.42<br>(-0.74, -0.1) | 3 (2,4)                   | -0.44<br>(-0.76, -0.13) |
| Turkmenistan               | 226 (140,342)    | 2.68<br>(2.63, 2.74) | 871 (401,1825)     | 3.57<br>(3.13, 4)    | 3853 (2352,5840)    | 1.35<br>(1.18, 1.53)   | 13496 (9282,18260)        | 1.37<br>(1.17, 1.57)    |
| Tuvalu                     | 0 (0,1)          | 1.38<br>(1.31, 1.46) | 2 (1,5)            | 0.83<br>(0.66, 0.99) | 8 (5,12)            | 0.4<br>(0.34, 0.46)    | 22 (16,31)                | 0.48<br>(0.42, 0.55)    |
| Ukraine                    | 2134 (1333,3292) | 0.43<br>(0.31, 0.55) | 10458 (4686,21492) | 0.35<br>(0.07, 0.62) | 39454 (23995,60616) | -0.57<br>(-0.7, -0.43) | 177661<br>(123710,240460) | -0.7<br>(-0.86, -0.53)  |
| Union of the Comoros       | 21 (12,32)       | 3.03<br>(2.96, 3.1)  | 99 (48,201)        | 3.41<br>(3.33, 3.49) | 501 (303,754)       | 2.42<br>(2.39, 2.46)   | 1625 (1130,2163)          | 2.24<br>(2.2, 2.29)     |
| United Arab Emirates       | 824 (513,1229)   | 8.86<br>(8.41, 9.3)  | 1890 (885,3963)    | 8.95<br>(8.71, 9.19) | 12290 (7548,19043)  | 7.21<br>(6.82, 7.6)    | 21588<br>(14828,29580)    | 6.77<br>(6.34, 7.21)    |

|                                                      |                        |                         |                      |                        |                           |                        |                             |                        |
|------------------------------------------------------|------------------------|-------------------------|----------------------|------------------------|---------------------------|------------------------|-----------------------------|------------------------|
| United Kingdom of Great Britain and Northern Ireland | 9899 (6462,14592)      | 0.72<br>(0.65, 0.79)    | 14198 (6557,28598)   | 0.93<br>(0.73, 1.13)   | 76013 (46467,113566)      | 0.42<br>(0.36, 0.48)   | 194426<br>(136945,263092)   | 0.22<br>(0.17, 0.26)   |
| United Mexican States                                | 28673<br>(18657,42268) | 2.93<br>(2.65, 3.21)    | 28152 (13061,56551)  | 3.63<br>(3.48, 3.78)   | 137289<br>(85090,207662)  | 1.75<br>(1.64, 1.85)   | 421849<br>(292836,571557)   | 1.75<br>(1.68, 1.83)   |
| United Republic of Tanzania                          | 1400 (837,2142)        | 3.85<br>(3.77, 3.93)    | 6118 (2806,12281)    | 3.59<br>(3.51, 3.67)   | 35003 (21229,52058)       | 3.22<br>(3.21, 3.23)   | 119748<br>(81999,163464)    | 3.05<br>(3.04, 3.07)   |
| United States of America                             | 32335<br>(21916,45622) | 1.33<br>(1.15, 1.5)     | 82052 (38220,167651) | 1.05<br>(0.86, 1.24)   | 266054<br>(163678,401376) | 0.13<br>(-0.03, 0.29)  | 1103039<br>(792699,1447228) | 0.2<br>(0.14, 0.25)    |
| United States Virgin Islands                         | 5 (3,7)                | -0.43<br>(-0.73, -0.12) | 20 (9,39)            | -0.75<br>(-1.09, -0.4) | 61 (38,93)                | -1.4<br>(-1.68, -1.13) | 155 (106,214)               | -1.38<br>(-1.67, -1.1) |

The values in parentheses in the 2021 column represent the 95% uncertainty intervals, while the values in parentheses in the EAPC column represent the 95% confidence intervals. EAPC, estimated annual percentage changes.

**Table S4. In 2021, age-standardized years lived with disability rate for women of reproductive age in 204 countries or territories, caused by rheumatoid arthritis, osteoarthritis, neck pain, and low back pain, along with estimated annual percentage changes from 1990 to 2021**

| Location                         | Age-standardized years lived with disability rate |                      |                         |                      |                           |                         |                              |                         |
|----------------------------------|---------------------------------------------------|----------------------|-------------------------|----------------------|---------------------------|-------------------------|------------------------------|-------------------------|
|                                  | Rheumatoid arthritis                              |                      | Osteoarthritis          |                      | Neck pain                 |                         | Low back pain                |                         |
|                                  | 2021                                              | EAPC (%)             | 2021                    | EAPC (%)             | 2021                      | EAPC (%)                | 2021                         | EAPC (%)                |
| American Samoa                   | 16.29<br>(7.35,29.03)                             | 0.63<br>(0.54, 0.72) | 96.13<br>(44.17,199.54) | 0.25<br>(0.19, 0.31) | 282.05<br>(139.31,500.3)  | -0.02<br>(-0.02, -0.02) | 805.77<br>(481.03,1231.57)   | -0.04<br>(-0.05, -0.03) |
| Antigua and Barbuda              | 25.55<br>(12.73,43.86)                            | 1.04<br>(0.98, 1.09) | 80.62<br>(36.58,165.96) | 0.27<br>(0.26, 0.29) | 335.18<br>(168.37,597.26) | 0<br>(-0.01, 0)         | 828.58<br>(499.71,1247.05)   | 0.03<br>(0.02, 0.05)    |
| Arab Republic of Egypt           | 29.94<br>(15.29,49.57)                            | 1.51<br>(1.44, 1.59) | 67.43<br>(30.62,139.05) | 0.51<br>(0.47, 0.55) | 578.45<br>(295.36,995.56) | 0.01<br>(0, 0.01)       | 1225.84<br>(748.02,1854.46)  | 0.12<br>(0.08, 0.17)    |
| Argentine Republic               | 43.33<br>(23.37,71.66)                            | 1.31<br>(1.2, 1.41)  | 83.01<br>(38.07,171.49) | 0.32<br>(0.29, 0.35) | 277.98<br>(139.05,489.67) | 0<br>(-0.01, 0)         | 1536.75<br>(942.14,2331.81)  | -0.05<br>(-0.11, 0.01)  |
| Australia                        | 42.8<br>(22.26,71.36)                             | 0.91<br>(0.81, 1.02) | 86.78<br>(40.6,177.25)  | 0.38<br>(0.35, 0.4)  | 173.16<br>(85.12,311.06)  | -0.02<br>(-0.05, 0.01)  | 1870.08<br>(1161.59,2809.51) | -0.22<br>(-0.27, -0.16) |
| Barbados                         | 38.48<br>(19.61,64.57)                            | 0.88<br>(0.78, 0.98) | 82.6<br>(38.36,169.63)  | 0.31<br>(0.28, 0.33) | 335.07<br>(165.58,599.52) | 0<br>(-0.01, 0)         | 836.25<br>(506.3,1277.27)    | 0<br>(-0.01, 0.01)      |
| Belize                           | 32.75<br>(16.56,54.82)                            | 1.13<br>(1.05, 1.21) | 80.13<br>(36.51,166.97) | 0.48<br>(0.42, 0.54) | 335.19<br>(167.93,596.4)  | 0<br>(-0.01, 0)         | 858.71<br>(521,1309.61)      | 0.03<br>(0.02, 0.04)    |
| Bermuda                          | 32.63<br>(16.31,56.32)                            | 1.07<br>(1.01, 1.14) | 86.26<br>(39.62,182.82) | 0.2<br>(0.18, 0.21)  | 336.96<br>(167.83,603.07) | 0<br>(0, 0)             | 857.43<br>(519.72,1317.87)   | -0.02<br>(-0.03, -0.02) |
| Bolivarian Republic of Venezuela | 54.35<br>(29.91,88.63)                            | 1.17<br>(1.03, 1.31) | 78.57<br>(35.64,160.28) | 0.26<br>(0.22, 0.3)  | 336.16<br>(166.58,595.06) | 0<br>(-0.01, 0)         | 1076.96<br>(649.75,1659.71)  | -0.23<br>(-0.25, -0.21) |
| Bosnia and Herzegovina           | 37.94<br>(20.07,62.67)                            | 1.4<br>(1.31, 1.48)  | 67.68<br>(30.64,140.63) | 0.81<br>(0.72, 0.91) | 308.16<br>(154.06,550.98) | 0<br>(0, 0.01)          | 1579.22<br>(971.56,2382.2)   | 0.23<br>(0.17, 0.29)    |
| Brunei Darussalam                | 34.76<br>(17.84,58.45)                            | 0.72<br>(0.6, 0.84)  | 100.84<br>(45.84,209)   | 0.22<br>(0.2, 0.24)  | 265.33<br>(131.96,474.04) | 0<br>(0, 0)             | 1309.55<br>(807.02,1987.11)  | -0.25<br>(-0.28, -0.22) |
| Burkina Faso                     | 10.01<br>(4.67,17.7)                              | 0.84<br>(0.77, 0.9)  | 53.19<br>(24.26,111.07) | 0.35<br>(0.34, 0.37) | 478.26<br>(240.9,822.11)  | 0.03<br>(0.03, 0.04)    | 851.73<br>(514.97,1306.6)    | -0.02<br>(-0.06, 0.02)  |
| Canada                           | 43.92<br>(26.34,67.2)                             | 0.97<br>(0.86, 1.07) | 67.8<br>(31.38,138.4)   | 0.31<br>(0.28, 0.35) | 306.33<br>(154.78,535.3)  | -0.01<br>(-0.01, 0)     | 1255.74<br>(771.92,1902.24)  | -0.19<br>(-0.25, -0.14) |

|                                              |                        |                      |                         |                        |                           |                      |                              |                         |
|----------------------------------------------|------------------------|----------------------|-------------------------|------------------------|---------------------------|----------------------|------------------------------|-------------------------|
| Central African Republic                     | 12.7<br>(6.28,21.75)   | 0.25<br>(0.22, 0.28) | 53.3<br>(24.82,109)     | 0.04<br>(0.02, 0.05)   | 374.94<br>(190.71,649.58) | 0.02<br>(0.02, 0.03) | 892.75<br>(540.57,1338.26)   | -0.04<br>(-0.05, -0.03) |
| Commonwealth of Dominica                     | 25.07<br>(12.42,42.75) | 0.82<br>(0.73, 0.91) | 77.31<br>(35.71,158.31) | 0.44<br>(0.41, 0.47)   | 335.1<br>(165.86,602.44)  | 0<br>(0, 0)          | 849.38<br>(517.98,1285.39)   | -0.06<br>(-0.08, -0.05) |
| Commonwealth of the Bahamas                  | 28.89<br>(14.56,49.19) | 0.86<br>(0.74, 0.98) | 82.56<br>(37.15,170.62) | 0.23<br>(0.21, 0.26)   | 335.05<br>(165.26,598.18) | 0<br>(0, 0)          | 826.04<br>(492.77,1253.31)   | -0.01<br>(-0.02, 0)     |
| Cook Islands                                 | 13.43<br>(6.16,24.07)  | 1.12<br>(1.08, 1.16) | 97.67<br>(45.45,201.35) | 0.47<br>(0.42, 0.52)   | 283.35<br>(140.66,499.81) | 0<br>(-0.01, 0)      | 820.39<br>(489.39,1255.97)   | 0.06<br>(0.05, 0.08)    |
| Czech Republic                               | 35.36<br>(18.27,58.5)  | 0.95<br>(0.92, 0.98) | 76.04<br>(34.96,159.53) | 0.32<br>(0.3, 0.34)    | 308.12<br>(154.3,547.52)  | 0.01<br>(0, 0.01)    | 1744.54<br>(1072.76,2640.66) | -0.04<br>(-0.05, -0.04) |
| Democratic People's Republic of Korea        | 28.28<br>(14.64,48.07) | 0.87<br>(0.84, 0.91) | 88.18<br>(40.14,180.26) | 0.28<br>(0.26, 0.29)   | 281<br>(138.43,492.53)    | 0.01<br>(0.01, 0.01) | 794.64<br>(474.66,1239.86)   | -0.15<br>(-0.16, -0.13) |
| Democratic Republic of Sao Tome and Principe | 12.56<br>(5.61,21.96)  | 0.94<br>(0.82, 1.07) | 71.22<br>(32.8,147.76)  | 0.73<br>(0.69, 0.77)   | 479.58<br>(242.55,827.8)  | 0.01<br>(0, 0.01)    | 732.46<br>(441.84,1118.31)   | -0.06<br>(-0.07, -0.04) |
| Democratic Republic of the Congo             | 12.73<br>(5.96,21.89)  | 0.41<br>(0.32, 0.51) | 56.3<br>(25.67,116.19)  | -0.04<br>(-0.14, 0.06) | 375.96<br>(188.8,653.37)  | 0.05<br>(0.04, 0.05) | 895.49<br>(539.07,1361.13)   | -0.07<br>(-0.1, -0.04)  |
| Democratic Republic of Timor-Leste           | 8.76<br>(3.91,15.51)   | 0.8<br>(0.76, 0.84)  | 62.06<br>(28.48,126.28) | 0.64<br>(0.61, 0.67)   | 263.56<br>(130.86,463.53) | 0.03<br>(0.02, 0.04) | 716.9<br>(427.38,1097.75)    | -0.16<br>(-0.19, -0.13) |
| Democratic Socialist Republic of Sri Lanka   | 8.35<br>(3.91,14.88)   | 0.92<br>(0.82, 1.01) | 67.7<br>(30.84,140.15)  | 0.51<br>(0.49, 0.53)   | 262.92<br>(130.6,461.51)  | 0.02<br>(0.02, 0.03) | 732.37<br>(434.9,1126.99)    | -0.03<br>(-0.04, -0.02) |
| Dominican Republic                           | 16.91<br>(7.87,29.34)  | 0.96<br>(0.89, 1.04) | 78.75<br>(36.12,166.29) | 0.45<br>(0.44, 0.47)   | 334.3<br>(167.95,595.28)  | 0<br>(-0.01, 0)      | 860.18<br>(522.91,1313.21)   | 0.12<br>(0.1, 0.14)     |
| Eastern Republic of Uruguay                  | 37.66<br>(19.77,61.76) | 1.14<br>(1.1, 1.18)  | 82.07<br>(38.24,170.39) | 0.31<br>(0.3, 0.33)    | 278.36<br>(139.85,494.5)  | -0.01<br>(-0.01, 0)  | 1559.34<br>(954.11,2368.7)   | 0.21<br>(0.13, 0.29)    |
| Federal Democratic                           | 9.77                   | 0.13                 | 60.01                   | 0.84                   | 310.43                    | -0.05                | 886.1                        | -0.25                   |

|                                      |                        |                      |                         |                      |                           |                         |                             |                         |
|--------------------------------------|------------------------|----------------------|-------------------------|----------------------|---------------------------|-------------------------|-----------------------------|-------------------------|
| Republic of Ethiopia                 | (5.48,15.81)           | (0.06, 0.2)          | (27.86,124.2)           | (0.8, 0.87)          | (157.25,548.96)           | (-0.23, 0.13)           | (540.84,1328.16)            | (-0.29, -0.2)           |
| Federal Democratic Republic of Nepal | 29.39<br>(14.43,50.35) | 1.53<br>(1.41, 1.65) | 73.76<br>(34.69,151.28) | 0.56<br>(0.54, 0.58) | 166.45<br>(82.05,299.86)  | 0.02<br>(0.02, 0.03)    | 1420.23<br>(870.06,2144.44) | -0.36<br>(-0.48, -0.24) |
| Federal Republic of Germany          | 38.6<br>(19.82,65.06)  | 0.63<br>(0.57, 0.68) | 75.88<br>(35.3,156.63)  | 0.21<br>(0.19, 0.23) | 387.28<br>(199.36,660.64) | -0.01<br>(-0.02, -0.01) | 1392.01<br>(861.61,2101.68) | -0.07<br>(-0.1, -0.05)  |
| Federal Republic of Nigeria          | 10.72<br>(6.48,16.52)  | 0.7<br>(0.59, 0.81)  | 58.58<br>(27.19,119.63) | 0.39<br>(0.31, 0.47) | 542.36<br>(276.98,959.18) | 0.07<br>(0.06, 0.08)    | 855.33<br>(522.17,1284.22)  | -0.12<br>(-0.18, -0.06) |
| Federal Republic of Somalia          | 9.13<br>(4.28,15.95)   | 0.11<br>(0.08, 0.14) | 49.55<br>(22.94,101.37) | 0.1<br>(0.08, 0.11)  | 268.46<br>(132.75,478.46) | 0.03<br>(0.02, 0.04)    | 899.97<br>(548.51,1368.44)  | 0.01<br>(-0.01, 0.02)   |
| Federated States of Micronesia       | 14.75<br>(6.83,26.68)  | 1.03<br>(0.97, 1.09) | 87.69<br>(39.89,179.44) | 0.44<br>(0.39, 0.5)  | 282.69<br>(142.36,498.32) | -0.01<br>(-0.01, 0)     | 822.52<br>(496.02,1245.7)   | 0.04<br>(0.03, 0.06)    |
| Federative Republic of Brazil        | 36.06<br>(22.28,54.23) | 0.24<br>(0.16, 0.32) | 72.36<br>(33.84,148.12) | 0.52<br>(0.51, 0.53) | 381.13<br>(191.46,666.92) | -0.21<br>(-0.34, -0.08) | 1318.71<br>(811.34,1978.41) | 0<br>(-0.01, 0.02)      |
| French Republic                      | 28.61<br>(14.44,48.86) | 0.88<br>(0.81, 0.95) | 74.86<br>(34.87,152.16) | 0.22<br>(0.2, 0.25)  | 298.02<br>(152.3,513.64)  | -0.13<br>(-0.42, 0.16)  | 1240.76<br>(759.69,1882.08) | -0.06<br>(-0.08, -0.04) |
| Gabonese Republic                    | 20.73<br>(10.02,35.97) | 1.19<br>(1.16, 1.22) | 69.44<br>(31.87,141.62) | 0.55<br>(0.53, 0.57) | 374.79<br>(187.53,656.26) | 0.01<br>(0, 0.01)       | 832.18<br>(503.47,1267.41)  | -0.01<br>(-0.01, 0)     |
| Georgia                              | 18.8<br>(9.01,33.19)   | 0.55<br>(0.47, 0.63) | 64.79<br>(29.07,137.08) | 0.28<br>(0.22, 0.34) | 308.83<br>(154.7,551.4)   | 0<br>(-0.01, 0)         | 1022.33<br>(627.31,1554.23) | -0.1<br>(-0.17, -0.04)  |
| Grand Duchy of Luxembourg            | 37.89<br>(19.7,63.03)  | 0.61<br>(0.57, 0.66) | 76.25<br>(34.95,159.15) | 0.24<br>(0.22, 0.25) | 388.17<br>(198.68,657.05) | 0<br>(0, 0.01)          | 1239.88<br>(765.95,1868.23) | -0.06<br>(-0.08, -0.05) |
| Greenland                            | 26.47<br>(13.16,45.23) | 1.18<br>(1.11, 1.24) | 69.6<br>(31.78,144.79)  | 0.42<br>(0.38, 0.45) | 303.64<br>(151.35,532.85) | 0.01<br>(0.01, 0.02)    | 1216.85<br>(737.37,1853.29) | -0.1<br>(-0.15, -0.05)  |
| Grenada                              | 21.83<br>(10.28,37.45) | 1.28<br>(1.17, 1.38) | 77.32<br>(35.82,160.91) | 0.45<br>(0.41, 0.49) | 334.37<br>(167.45,596.73) | 0<br>(0, 0)             | 842.78<br>(507.14,1285.53)  | 0.03<br>(0.02, 0.04)    |
| Guam                                 | 14.9<br>(6.71,26.51)   | 1.06<br>(0.98, 1.14) | 95.31<br>(43.47,194.35) | 0.43<br>(0.4, 0.45)  | 285.06<br>(141.76,504.06) | 0<br>(0, 0)             | 789.93<br>(482.56,1203.7)   | -0.03<br>(-0.05, -0.02) |
| Hashemite                            | 30.55                  | 1.75                 | 73.98                   | 0.57                 | 575.41                    | 0                       | 1197.42                     | -0.01                   |

|                                          |                         |                      |                         |                      |                            |                         |                              |                         |
|------------------------------------------|-------------------------|----------------------|-------------------------|----------------------|----------------------------|-------------------------|------------------------------|-------------------------|
| Kingdom of Jordan                        | (15.74,50.08)           | (1.62, 1.87)         | (33.78,151.96)          | (0.54, 0.6)          | (294.47,985.21)            | (-0.01, 0)              | (725.85,1822.38)             | (-0.02, -0.01)          |
| Hellenic Republic                        | 40.02<br>(21.89,66.77)  | 0.53<br>(0.49, 0.56) | 72.46<br>(34.05,149.23) | 0.7<br>(0.55, 0.86)  | 477.26<br>(248.62,811.39)  | 0.16<br>(-0.19, 0.52)   | 1132.5<br>(686.39,1699.63)   | -0.06<br>(-0.08, -0.04) |
| Hungary                                  | 32.7<br>(16.85,55.45)   | 0.8<br>(0.73, 0.88)  | 76.15<br>(33.65,161.19) | 0.31<br>(0.28, 0.34) | 308.56<br>(153.01,543.02)  | 0.01<br>(0.01, 0.02)    | 1818.54<br>(1122.11,2762.76) | -0.1<br>(-0.12, -0.07)  |
| Independent State of<br>Papua New Guinea | 8.68<br>(4.28,14.94)    | 0.52<br>(0.47, 0.57) | 71<br>(33.07,146.98)    | 0.38<br>(0.35, 0.4)  | 282.45<br>(139.92,498.53)  | 0.02<br>(0.02, 0.03)    | 792.19<br>(478.92,1205.93)   | 0.07<br>(0.05, 0.1)     |
| Independent State of<br>Samoa            | 14.35<br>(6.31,25.46)   | 0.62<br>(0.57, 0.67) | 89.19<br>(40.85,182.03) | 0.43<br>(0.41, 0.45) | 283.34<br>(141.17,499.53)  | -0.01<br>(-0.01, -0.01) | 817.31<br>(491.47,1241.44)   | -0.22<br>(-0.25, -0.19) |
| Ireland                                  | 55.32<br>(29.46,90.71)  | 0.74<br>(0.66, 0.83) | 75.33<br>(34.26,155.7)  | 0.27<br>(0.25, 0.29) | 387.25<br>(196.42,656.32)  | 0<br>(-0.01, 0)         | 1219.64<br>(748.85,1840.14)  | -0.05<br>(-0.08, -0.02) |
| Islamic Republic of<br>Afghanistan       | 18.11<br>(8.9,31.53)    | 0.96<br>(0.81, 1.1)  | 51.6<br>(24.14,106.39)  | 0.45<br>(0.39, 0.52) | 570.76<br>(291.89,979.58)  | 0.01<br>(0, 0.01)       | 1184.39<br>(718.64,1802.32)  | 0.06<br>(0.05, 0.07)    |
| Islamic Republic of<br>Iran              | 22.31<br>(13.37,34.6)   | 1.09<br>(1.06, 1.12) | 62.21<br>(28.6,127.25)  | 0.6<br>(0.47, 0.74)  | 659.53<br>(339.21,1150.31) | -0.1<br>(-0.23, 0.02)   | 1350.6<br>(836.81,2024.03)   | -0.17<br>(-0.19, -0.15) |
| Islamic Republic of<br>Mauritania        | 13.27<br>(5.96,23.53)   | 1.05<br>(0.95, 1.14) | 64.77<br>(29.9,136.02)  | 0.49<br>(0.47, 0.5)  | 478.47<br>(240.91,821.28)  | 0.01<br>(0.01, 0.02)    | 793.82<br>(472.97,1210.45)   | -0.12<br>(-0.15, -0.09) |
| Islamic Republic of<br>Pakistan          | 33.54<br>(19.74,52.84)  | 0.16<br>(0.05, 0.28) | 71.01<br>(32.57,145.89) | 0.62<br>(0.6, 0.64)  | 197.1<br>(97.96,351.11)    | 0<br>(0, 0.01)          | 1166.95<br>(693.76,1798.4)   | 0.42<br>(0.32, 0.51)    |
| Jamaica                                  | 25.61<br>(12.78,43.75)  | 1.13<br>(1.03, 1.24) | 77<br>(35.5,158.99)     | 0.39<br>(0.36, 0.42) | 335.85<br>(166.49,597.41)  | 0<br>(0, 0)             | 870.4<br>(523.48,1322.57)    | -0.01<br>(-0.04, 0.01)  |
| Japan                                    | 37.52<br>(22.21,58.75)  | 0.48<br>(0.39, 0.56) | 88.19<br>(40.19,183.41) | 0.81<br>(0.48, 1.15) | 304.43<br>(154.43,544)     | 0.01<br>(0, 0.01)       | 1668.62<br>(1031.13,2493.18) | -0.25<br>(-0.29, -0.22) |
| Kingdom of Bahrain                       | 61.95<br>(32.51,102.41) | 1.81<br>(1.72, 1.91) | 76.26<br>(34.67,157.06) | 0.35<br>(0.34, 0.36) | 576.38<br>(294.75,983.71)  | 0<br>(0, 0.01)          | 1173.25<br>(714.15,1778.65)  | 0<br>(0, 0.01)          |
| Kingdom of<br>Belgium                    | 39.47<br>(20.88,67.83)  | 0.59<br>(0.55, 0.62) | 75.34<br>(34.14,156.74) | 0.2<br>(0.19, 0.22)  | 376.44<br>(192.52,642.97)  | -0.02<br>(-0.04, 0)     | 1204.23<br>(735.94,1813.21)  | -0.07<br>(-0.09, -0.06) |
| Kingdom of Bhutan                        | 34.32<br>(17.8,57.45)   | 1.48<br>(1.34, 1.61) | 80.63<br>(37.58,168.72) | 0.54<br>(0.51, 0.56) | 168.02<br>(82.26,298.16)   | 0.02<br>(0.01, 0.02)    | 1251.59<br>(763.79,1900.12)  | -0.03<br>(-0.04, -0.02) |

|                                  |                        |                         |                         |                      |                           |                         |                             |                         |
|----------------------------------|------------------------|-------------------------|-------------------------|----------------------|---------------------------|-------------------------|-----------------------------|-------------------------|
| Kingdom of Cambodia              | 9.63<br>(4.49,17.08)   | 1.07<br>(1.02, 1.12)    | 59.29<br>(27.49,122.06) | 0.54<br>(0.52, 0.56) | 262.53<br>(129.3,463.18)  | 0.04<br>(0.03, 0.04)    | 805.68<br>(487.33,1232.11)  | -0.21<br>(-0.22, -0.2)  |
| Kingdom of Denmark               | 38.54<br>(20.11,64.61) | 1.2<br>(1.12, 1.28)     | 72.68<br>(33.45,151.07) | 0.1<br>(0.06, 0.13)  | 462.18<br>(240.49,787.21) | 0.14<br>(0.06, 0.21)    | 1343.02<br>(804.27,2085.71) | -0.63<br>(-0.73, -0.54) |
| Kingdom of Eswatini              | 28.16<br>(14.75,46.6)  | 0.19<br>(0.06, 0.32)    | 65.46<br>(30.62,135.2)  | 0.43<br>(0.38, 0.48) | 371.23<br>(186.56,639.14) | -0.08<br>(-0.09, -0.07) | 635.42<br>(384.96,966.73)   | -0.17<br>(-0.23, -0.11) |
| Kingdom of Lesotho               | 23.9<br>(12.17,40.26)  | 0.38<br>(0.27, 0.49)    | 61.41<br>(28.7,125.75)  | 0.67<br>(0.64, 0.71) | 370.15<br>(188.18,640.06) | -0.07<br>(-0.08, -0.07) | 676.23<br>(407.62,1036.67)  | -0.26<br>(-0.29, -0.24) |
| Kingdom of Morocco               | 23.52<br>(11.6,40.27)  | 1.39<br>(1.28, 1.49)    | 64.87<br>(29.94,134.82) | 0.31<br>(0.25, 0.36) | 573.88<br>(292.63,982.5)  | -0.01<br>(-0.01, 0)     | 1350.48<br>(829.1,2028.56)  | -0.04<br>(-0.15, 0.07)  |
| Kingdom of Norway                | 42.01<br>(24.87,67.02) | 0.28<br>(0.14, 0.43)    | 73.72<br>(33.73,153.09) | 0.37<br>(0.27, 0.46) | 331.33<br>(168.37,583.46) | -0.45<br>(-0.73, -0.16) | 1133.78<br>(697.14,1707.17) | -0.22<br>(-0.25, -0.19) |
| Kingdom of Saudi Arabia          | 28.9<br>(14.64,48.96)  | 1.89<br>(1.75, 2.04)    | 76.56<br>(35.33,157.75) | 0.37<br>(0.23, 0.51) | 576.8<br>(295.7,991.9)    | 0<br>(0, 0.01)          | 1187.66<br>(725.6,1818.36)  | 0.12<br>(0.11, 0.13)    |
| Kingdom of Spain                 | 30.79<br>(17.04,48.99) | 0.33<br>(0.27, 0.38)    | 77.94<br>(35.68,159.24) | 0.43<br>(0.37, 0.48) | 319.97<br>(164.72,554.62) | -2.17<br>(-3.16, -1.17) | 981.02<br>(593.79,1487.95)  | 0.15<br>(0.02, 0.27)    |
| Kingdom of Sweden                | 39.7<br>(22.69,63.42)  | -0.46<br>(-0.54, -0.37) | 59.66<br>(27.19,123.61) | 0.56<br>(0.38, 0.74) | 414.05<br>(214.87,704.81) | 0.03<br>(-0.11, 0.17)   | 866.82<br>(511.43,1352.57)  | 0.92<br>(0.68, 1.17)    |
| Kingdom of Thailand              | 13 (6.04,23.14)        | 1.35<br>(1.28, 1.42)    | 72.66<br>(33.73,148.26) | 0.74<br>(0.74, 0.75) | 263.87<br>(129.16,465.66) | 0.01<br>(0.01, 0.02)    | 677.44<br>(409.81,1029.47)  | 0.33<br>(0.23, 0.43)    |
| Kingdom of the Netherlands       | 43.97<br>(23.19,73.22) | 0.57<br>(0.48, 0.67)    | 76.44<br>(35.73,155.77) | 0.06<br>(0, 0.12)    | 344.87<br>(175.66,586.68) | -0.08<br>(-0.12, -0.05) | 1041.76<br>(640.51,1568.49) | -0.15<br>(-0.17, -0.14) |
| Kingdom of Tonga                 | 13.44<br>(5.91,24.49)  | 0.73<br>(0.68, 0.78)    | 87.29<br>(40.9,180.81)  | 0.37<br>(0.31, 0.43) | 283.87<br>(140.52,501.34) | -0.01<br>(-0.01, 0)     | 815.59<br>(492.07,1245.84)  | -0.12<br>(-0.14, -0.1)  |
| Kyrgyz Republic                  | 60.89<br>(34.52,98.18) | 1.16<br>(1.08, 1.24)    | 68.27<br>(31.16,142.55) | 0.58<br>(0.49, 0.66) | 308.06<br>(151.66,545.45) | 0.01<br>(0, 0.01)       | 1114.38<br>(687.25,1685.31) | -0.12<br>(-0.14, -0.11) |
| Lao People's Democratic Republic | 10.13<br>(4.85,17.74)  | 1<br>(0.94, 1.06)       | 61.58<br>(28.59,128.13) | 0.55<br>(0.52, 0.57) | 263.52<br>(131.13,469.76) | 0.02<br>(0.02, 0.03)    | 755.33<br>(460.92,1159.37)  | -0.06<br>(-0.11, -0.02) |

|                                         |                        |                      |                         |                      |                           |                         |                              |                         |
|-----------------------------------------|------------------------|----------------------|-------------------------|----------------------|---------------------------|-------------------------|------------------------------|-------------------------|
| Lebanese Republic                       | 43.38<br>(23.4,70.45)  | 1.36<br>(1.22, 1.5)  | 70.66<br>(32.59,145.13) | 0.68<br>(0.65, 0.71) | 573.93<br>(296.58,981.86) | 0<br>(-0.01, 0)         | 1159.55<br>(703.93,1752.51)  | 0.08<br>(0.05, 0.1)     |
| Malaysia                                | 7.25<br>(3.42,12.65)   | 0.83<br>(0.77, 0.9)  | 75.71<br>(35.51,157.56) | 0.55<br>(0.52, 0.57) | 262.74<br>(128.46,459.6)  | 0.1<br>(0.04, 0.16)     | 743.22<br>(442.92,1154.2)    | -0.13<br>(-0.18, -0.08) |
| Mongolia                                | 25.6<br>(13.09,43.3)   | 1.54<br>(1.41, 1.67) | 73.65<br>(33.4,156.14)  | 0.95<br>(0.89, 1)    | 307.54<br>(151.84,546.21) | 0.01<br>(0.01, 0.02)    | 1092.48<br>(669.63,1644.69)  | -0.15<br>(-0.16, -0.14) |
| Montenegro                              | 23.67<br>(11.64,39.79) | 0.82<br>(0.67, 0.98) | 73.8<br>(33.6,156.03)   | 0.37<br>(0.35, 0.4)  | 308.31<br>(151.95,547.31) | 0<br>(-0.01, 0)         | 1646.73<br>(1005.47,2470.44) | 0.08<br>(0.06, 0.1)     |
| New Zealand                             | 47.59<br>(26.2,77.33)  | 0.45<br>(0.34, 0.55) | 78.74<br>(36.57,162.82) | 0.39<br>(0.36, 0.41) | 109.35<br>(50.9,207.02)   | -0.29<br>(-0.97, 0.39)  | 2004.9<br>(1243.43,2984.95)  | -0.09<br>(-0.12, -0.06) |
| North Macedonia                         | 22.15<br>(10.6,38.21)  | 1.15<br>(1.06, 1.25) | 69.14<br>(30.94,143.38) | 0.53<br>(0.5, 0.55)  | 307.65<br>(152.52,547.09) | 0.01<br>(0, 0.01)       | 1501.98<br>(914.3,2256.52)   | 0.02<br>(0.01, 0.04)    |
| Northern Mariana Islands                | 15.52<br>(7.12,27.49)  | 0.3<br>(0.21, 0.38)  | 93.66<br>(43.01,189.03) | 0.23<br>(0.18, 0.28) | 284.65<br>(142.06,505.14) | 0<br>(0, 0)             | 805.27<br>(480.24,1239.07)   | -0.08<br>(-0.09, -0.07) |
| Palestine                               | 26.51<br>(12.93,45.51) | 1.07<br>(0.96, 1.17) | 67.6<br>(30.95,139.9)   | 0.58<br>(0.54, 0.61) | 575.9<br>(294.9,992.45)   | 0<br>(0, 0)             | 1170.03<br>(714.34,1784.45)  | -0.07<br>(-0.09, -0.06) |
| People's Democratic Republic of Algeria | 20.06<br>(10.01,34.33) | 1.55<br>(1.45, 1.65) | 70.48<br>(32.75,144.32) | 0.77<br>(0.75, 0.79) | 577.63<br>(295.97,981.69) | 0<br>(0, 0)             | 1173.65<br>(704.04,1788.38)  | -0.05<br>(-0.07, -0.04) |
| People's Republic of Bangladesh         | 29.12<br>(14.64,49.32) | 1.46<br>(1.31, 1.61) | 77.57<br>(35.64,158.44) | 0.48<br>(0.45, 0.51) | 166.54<br>(82.65,296.5)   | 0.01<br>(0.01, 0.02)    | 1267.6<br>(772.45,1925.56)   | -0.3<br>(-0.37, -0.22)  |
| People's Republic of China              | 37.34<br>(22.91,56.74) | 0.55<br>(0.49, 0.61) | 90.64<br>(42.78,183.59) | 0.75<br>(0.59, 0.91) | 295.04<br>(149.02,520.02) | -0.15<br>(-0.19, -0.1)  | 599.79<br>(362.05,909)       | -0.61<br>(-0.8, -0.42)  |
| Plurinational State of Bolivia          | 50.75<br>(28.01,82.92) | 1.5<br>(1.45, 1.54)  | 80.24<br>(36.77,168.64) | 0.49<br>(0.46, 0.51) | 333.9<br>(167.25,595.73)  | 0.01<br>(0, 0.01)       | 790.89<br>(472.93,1212.55)   | 0.02<br>(-0.02, 0.06)   |
| Portuguese Republic                     | 48.16<br>(25.37,78.53) | 1.33<br>(1.2, 1.45)  | 74.3<br>(33.7,154.23)   | 0.62<br>(0.42, 0.83) | 387.41<br>(197.99,657.02) | 0.01<br>(0, 0.01)       | 1276.76<br>(784.35,1916.8)   | -0.1<br>(-0.11, -0.08)  |
| Principality of Andorra                 | 31.71<br>(16.42,53.47) | 0.49<br>(0.45, 0.53) | 76.34<br>(35.55,156.93) | 0.22<br>(0.19, 0.25) | 387.88<br>(200.06,658.07) | -0.01<br>(-0.01, -0.01) | 1163<br>(705.76,1790.29)     | -0.1<br>(-0.11, -0.09)  |
| Principality of                         | 31.52                  | 0.44                 | 77.54                   | 0.17                 | 387.55                    | -0.01                   | 1156.49                      | -0.1                    |

|                        |                        |                      |                         |                      |                           |                         |                              |                         |
|------------------------|------------------------|----------------------|-------------------------|----------------------|---------------------------|-------------------------|------------------------------|-------------------------|
| Monaco                 | (16.2,54.48)           | (0.34, 0.53)         | (35.85,158.42)          | (0.15, 0.19)         | (201.67,662.15)           | (-0.01, -0.01)          | (697.99,1740.49)             | (-0.11, -0.09)          |
| Puerto Rico            | 41.16<br>(21.29,69.39) | 1.51<br>(1.42, 1.6)  | 87.66<br>(40.01,184.94) | 0.33<br>(0.31, 0.35) | 336.28<br>(164.18,597.58) | 0<br>(0, 0)             | 832.45<br>(495.35,1277.03)   | -0.01<br>(-0.02, 0)     |
| Republic of Albania    | 25.21<br>(12.48,42.53) | 1.57<br>(1.51, 1.62) | 58.96<br>(26.93,122.96) | 0.71<br>(0.67, 0.75) | 308.3<br>(154.03,553.19)  | 0.01<br>(0.01, 0.02)    | 1707.06<br>(1058.23,2569.67) | 0.03<br>(0.03, 0.04)    |
| Republic of Angola     | 14.12<br>(6.54,24.91)  | 0.77<br>(0.71, 0.83) | 71.26<br>(31.97,146.41) | 0.21<br>(0.2, 0.22)  | 376.67<br>(188.41,652.91) | 0.02<br>(0.01, 0.02)    | 882.7<br>(544.84,1348.29)    | -0.21<br>(-0.24, -0.17) |
| Republic of Armenia    | 22.25<br>(11.19,37.94) | 1.45<br>(1.39, 1.51) | 68.51<br>(30.99,139.77) | 0.84<br>(0.78, 0.89) | 308.19<br>(152.95,549.46) | 0.01<br>(0, 0.01)       | 1202.04<br>(735.24,1823.46)  | 0.03<br>(0.01, 0.05)    |
| Republic of Austria    | 42.49<br>(21.68,72.37) | 0.49<br>(0.4, 0.59)  | 74.86<br>(34.36,154.04) | 0.26<br>(0.24, 0.27) | 487.72<br>(253.42,831.99) | -0.11<br>(-0.28, 0.05)  | 991.96<br>(608.91,1491.68)   | -0.02<br>(-0.1, 0.06)   |
| Republic of Azerbaijan | 16.53<br>(7.86,29.47)  | 1.07<br>(0.78, 1.36) | 70.53<br>(32.37,145.57) | 0.51<br>(0.41, 0.61) | 308.16<br>(151.36,542.26) | 0.01<br>(0.01, 0.02)    | 1125.24<br>(686.03,1697.33)  | 0.11<br>(0.09, 0.13)    |
| Republic of Belarus    | 22.26<br>(10.78,38.59) | 1.38<br>(1.25, 1.52) | 86.29<br>(38.97,178.91) | 0.61<br>(0.58, 0.64) | 307.43<br>(153.11,545.55) | 0.01<br>(0, 0.01)       | 1294.15<br>(793.41,1954.48)  | -0.02<br>(-0.03, -0.01) |
| Republic of Benin      | 10.95<br>(5.07,19.29)  | 0.88<br>(0.82, 0.95) | 63.57<br>(29.58,132.18) | 0.62<br>(0.6, 0.64)  | 475.12<br>(240.47,815.25) | 0.02<br>(0.02, 0.02)    | 834.06<br>(497.62,1271.94)   | -0.11<br>(-0.15, -0.08) |
| Republic of Botswana   | 25.88<br>(13.21,43.04) | 1.03<br>(0.9, 1.16)  | 67.79<br>(31.39,138.52) | 0.57<br>(0.54, 0.61) | 373.99<br>(189.46,647.94) | -0.03<br>(-0.04, -0.02) | 706.65<br>(423.31,1073.54)   | -0.03<br>(-0.04, -0.02) |
| Republic of Bulgaria   | 22.24<br>(10.67,38.4)  | 0.66<br>(0.51, 0.82) | 74.23<br>(33.1,157.23)  | 0.42<br>(0.4, 0.44)  | 307.82<br>(152.62,539.56) | 0.01<br>(0, 0.01)       | 1582.27<br>(971.92,2390.04)  | -0.04<br>(-0.06, -0.03) |
| Republic of Burundi    | 9.16 (4.3,16.3)        | 0.33<br>(0.29, 0.38) | 50.12<br>(23.05,104.15) | 0.11<br>(0.1, 0.13)  | 269.72<br>(135.38,485.85) | 0.02<br>(0.01, 0.03)    | 903.99<br>(540.77,1372.44)   | -0.14<br>(-0.15, -0.14) |
| Republic of Cabo Verde | 12.59<br>(5.92,22.62)  | 1.21<br>(1.1, 1.32)  | 65.15<br>(30.13,134.23) | 0.72<br>(0.7, 0.74)  | 478.83<br>(242.84,820.19) | 0.01<br>(0, 0.01)       | 772.94<br>(466.11,1182.2)    | -0.17<br>(-0.21, -0.13) |
| Republic of Cameroon   | 12.4 (5.8,21.76)       | 0.65<br>(0.51, 0.79) | 63.78<br>(30.12,134.06) | 0.42<br>(0.39, 0.45) | 476.07<br>(241.84,817.57) | 0.02<br>(0.02, 0.03)    | 866.88<br>(524.59,1312.24)   | -0.16<br>(-0.19, -0.12) |
| Republic of Chad       | 8.56<br>(4.21,14.68)   | 0.54<br>(0.43, 0.64) | 51.83<br>(24.31,106.23) | 0.23<br>(0.22, 0.24) | 475.42<br>(239.06,827.09) | 0.01<br>(0.01, 0.01)    | 929.9<br>(563.56,1425.12)    | -0.24<br>(-0.36, -0.13) |

|                               |                        |                      |                         |                      |                           |                      |                             |                         |
|-------------------------------|------------------------|----------------------|-------------------------|----------------------|---------------------------|----------------------|-----------------------------|-------------------------|
| Republic of Chile             | 60.03<br>(31.66,98.18) | 1.7<br>(1.6, 1.81)   | 82.6<br>(39.09,172.04)  | 0.41<br>(0.38, 0.44) | 277.26<br>(137.77,488.79) | 0.01<br>(0, 0.01)    | 1560.74<br>(961.67,2339.13) | -0.05<br>(-0.11, 0.01)  |
| Republic of Colombia          | 43.82<br>(23.23,71.64) | 1.33<br>(1.19, 1.48) | 77.98<br>(36.25,160.09) | 0.5<br>(0.48, 0.51)  | 336.55<br>(167.83,598.71) | 0.01<br>(0, 0.01)    | 1323.91<br>(808.26,1971.41) | 0.04<br>(0.03, 0.06)    |
| Republic of Costa Rica        | 55.48<br>(29.35,91.66) | 1.34<br>(1.26, 1.41) | 78.69<br>(35.18,163.09) | 0.44<br>(0.42, 0.47) | 335.22<br>(166.16,587.96) | 0<br>(-0.01, 0)      | 1182.41<br>(724.41,1779.48) | -0.17<br>(-0.18, -0.16) |
| Republic of Croatia           | 37.79<br>(19.35,63.85) | 1.26<br>(1.23, 1.29) | 72.2<br>(32.93,150.61)  | 0.45<br>(0.43, 0.47) | 308.25<br>(151.71,543.68) | 0.01<br>(0.01, 0.02) | 1553.39<br>(945.66,2333.76) | -0.17<br>(-0.21, -0.13) |
| Republic of Cuba              | 42.47<br>(22.78,71.54) | 1.19<br>(1.11, 1.26) | 77.32<br>(35.66,159.77) | 0.42<br>(0.4, 0.44)  | 336.41<br>(167.44,602.11) | 0.02<br>(0.01, 0.02) | 781.97<br>(490.38,1137.68)  | -0.08<br>(-0.14, -0.01) |
| Republic of Cyprus            | 45.08<br>(24.07,73.68) | 0.79<br>(0.65, 0.93) | 73.73<br>(34.22,150.52) | 0.37<br>(0.34, 0.41) | 389.48<br>(200.83,666.23) | 0<br>(0, 0.01)       | 1169.91<br>(718.44,1776.67) | -0.06<br>(-0.08, -0.04) |
| Republic of Côte d'Ivoire     | 11.07<br>(5.03,19.2)   | 0.76<br>(0.64, 0.88) | 61.16<br>(28.76,125.39) | 0.4<br>(0.38, 0.43)  | 475.97<br>(239.03,814.97) | 0.04<br>(0.03, 0.04) | 871.94<br>(523.61,1337.09)  | -0.04<br>(-0.08, 0)     |
| Republic of Djibouti          | 10.42<br>(4.69,18.6)   | 0.76<br>(0.66, 0.85) | 62.92<br>(28.73,129.79) | 0.74<br>(0.69, 0.8)  | 270.32<br>(134.74,477.38) | 0.01<br>(0, 0.01)    | 810.27<br>(489.28,1242.03)  | -0.21<br>(-0.22, -0.19) |
| Republic of Ecuador           | 51.96<br>(28.1,84.97)  | 1.42<br>(1.35, 1.5)  | 87.42<br>(40.63,179.82) | 0.56<br>(0.48, 0.64) | 336.04<br>(168.47,597.66) | 0<br>(0, 0.01)       | 676.19<br>(417.44,1007.57)  | -0.31<br>(-0.48, -0.15) |
| Republic of El Salvador       | 26.75<br>(14.25,44.61) | 1.41<br>(1.3, 1.53)  | 77.42<br>(36.07,158.82) | 0.48<br>(0.45, 0.51) | 335.84<br>(166.73,597.88) | 0.01<br>(0, 0.01)    | 1193.05<br>(725.23,1836.4)  | 0.04<br>(0.02, 0.06)    |
| Republic of Equatorial Guinea | 19.44<br>(9.09,34.21)  | 2.23<br>(2.08, 2.39) | 69.97<br>(32.42,145.25) | 1.37<br>(1.28, 1.46) | 374.92<br>(187.58,650.64) | 0.03<br>(0.02, 0.03) | 859.08<br>(522.59,1306.71)  | -0.15<br>(-0.17, -0.13) |
| Republic of Estonia           | 56.97<br>(31.45,94.02) | 1.3<br>(1.16, 1.44)  | 91.37<br>(41.95,189.99) | 0.56<br>(0.52, 0.6)  | 307.3<br>(153.24,546.28)  | 0.01<br>(0.01, 0.02) | 1273.23<br>(779.54,1910.33) | 0.11<br>(0.06, 0.15)    |
| Republic of Fiji              | 9.83<br>(4.86,16.89)   | 0.8<br>(0.7, 0.91)   | 90.12<br>(42.57,188.85) | 0.56<br>(0.52, 0.6)  | 283.02<br>(139.94,492.32) | 0<br>(0, 0)          | 776.25<br>(463.59,1188.54)  | -0.11<br>(-0.12, -0.1)  |
| Republic of Finland           | 53.1<br>(28.91,87.45)  | 0.94<br>(0.85, 1.04) | 75.61<br>(34.47,156.02) | 0.29<br>(0.27, 0.31) | 345.49<br>(176.33,585.91) | 0.17<br>(0.12, 0.21) | 990.29<br>(608.26,1492.53)  | -0.07<br>(-0.09, -0.04) |
| Republic of Ghana             | 10.98                  | 1.17                 | 67.81                   | 0.16                 | 476.45                    | 0.02                 | 680.66                      | -0.21                   |

|                           |                         |                      |                         |                      |                           |                        |                             |                         |
|---------------------------|-------------------------|----------------------|-------------------------|----------------------|---------------------------|------------------------|-----------------------------|-------------------------|
|                           | (5.09,19.67)            | (1.07, 1.27)         | (31.01,139)             | (0.03, 0.3)          | (245.14,813.58)           | (0.01, 0.02)           | (418.8,1025.22)             | (-0.23, -0.19)          |
| Republic of Guatemala     | 33.87<br>(17.84,56.18)  | 1.67<br>(1.53, 1.81) | 70.15<br>(32.42,144.6)  | 0.41<br>(0.39, 0.42) | 332.94<br>(164.65,592.19) | 0.01<br>(0.01, 0.01)   | 1326.85<br>(806.38,1998.47) | -0.13<br>(-0.16, -0.09) |
| Republic of Guinea        | 9.53<br>(4.56,16.56)    | 0.51<br>(0.43, 0.6)  | 54.69<br>(24.9,111.91)  | 0.3<br>(0.29, 0.32)  | 476.33<br>(242.08,822.62) | 0.01<br>(0.01, 0.01)   | 858.89<br>(518.98,1296.59)  | -0.05<br>(-0.09, -0.01) |
| Republic of Guinea-Bissau | 9.69<br>(4.73,16.95)    | 0.59<br>(0.51, 0.68) | 56.1<br>(26.46,114.33)  | 0.3<br>(0.28, 0.31)  | 475.46<br>(241.13,814.13) | 0.01<br>(0.01, 0.01)   | 805.12<br>(481.02,1220.54)  | -0.07<br>(-0.11, -0.04) |
| Republic of Guyana        | 17.72<br>(8.52,30.4)    | 0.89<br>(0.85, 0.93) | 75.74<br>(34.29,156.5)  | 0.44<br>(0.41, 0.47) | 331.35<br>(165.85,586)    | 0<br>(-0.01, 0)        | 823.81<br>(493.58,1242.98)  | -0.04<br>(-0.04, -0.03) |
| Republic of Haiti         | 19.77<br>(9.45,33.65)   | 0.64<br>(0.57, 0.72) | 61.87<br>(28.77,125.35) | 0.41<br>(0.4, 0.42)  | 330.46<br>(165.46,589)    | 0.01<br>(0, 0.02)      | 821.92<br>(500.78,1243.28)  | -0.03<br>(-0.06, -0.01) |
| Republic of Honduras      | 64.83<br>(37.28,101.02) | 1.18<br>(1.07, 1.29) | 71.78<br>(33.14,147.55) | 0.41<br>(0.39, 0.43) | 334.76<br>(166.09,590.73) | 0<br>(0, 0)            | 1209.5<br>(733.93,1845.28)  | -0.01<br>(-0.02, 0)     |
| Republic of Iceland       | 43.87<br>(22.65,73.45)  | 0.64<br>(0.59, 0.69) | 87.62<br>(39.18,179.59) | 0.68<br>(0.58, 0.79) | 388.56<br>(199.35,663.55) | 0<br>(-0.01, 0)        | 1226.46<br>(749.2,1852.62)  | -0.22<br>(-0.23, -0.21) |
| Republic of India         | 26.59<br>(16.15,41.16)  | 1<br>(0.86, 1.15)    | 82.36<br>(37.93,168.9)  | 0.81<br>(0.66, 0.95) | 196.95<br>(100.25,349.68) | -0.29<br>(-0.89, 0.32) | 923.34<br>(563.21,1389.05)  | -0.53<br>(-0.67, -0.39) |
| Republic of Indonesia     | 5.53 (3.13,8.98)        | 0.4<br>(0.33, 0.47)  | 62.08<br>(28.45,127.16) | 0.55<br>(0.53, 0.58) | 307.44<br>(155.05,545.23) | 0.01<br>(0.01, 0.02)   | 881.58<br>(537.1,1331.12)   | -0.01<br>(-0.03, 0.02)  |
| Republic of Iraq          | 27.48<br>(14.02,45.43)  | 1.19<br>(1.02, 1.36) | 66.71<br>(31.02,137.13) | 0.3<br>(0.27, 0.33)  | 573.77<br>(292.04,977.6)  | 0<br>(0, 0)            | 1166.82<br>(715.05,1757.59) | -0.04<br>(-0.06, -0.03) |
| Republic of Italy         | 31.73<br>(19.02,49.49)  | 0.11<br>(0.09, 0.14) | 71.27<br>(32.83,146.67) | 0.27<br>(0.23, 0.32) | 431.42<br>(219.05,763.4)  | 0.01<br>(0.01, 0.02)   | 1202.67<br>(742.45,1801.7)  | -0.18<br>(-0.19, -0.17) |
| Republic of Kazakhstan    | 20.46<br>(9.4,35.95)    | 1.26<br>(1.02, 1.49) | 77.3<br>(33.9,163.24)   | 0.71<br>(0.65, 0.76) | 307.55<br>(151.54,542.17) | 0.01<br>(0.01, 0.01)   | 1163.94<br>(703.93,1758.44) | 0.05<br>(-0.01, 0.11)   |
| Republic of Kenya         | 10.15<br>(5.91,16.11)   | 0.48<br>(0.36, 0.59) | 62.01<br>(28.06,128.31) | 0.46<br>(0.43, 0.5)  | 309.82<br>(157.5,548.83)  | 0.02<br>(0.01, 0.02)   | 1013.03<br>(620.11,1518.66) | -0.17<br>(-0.19, -0.14) |
| Republic of Kiribati      | 8.85 (4.4,15.19)        | 0.46<br>(0.41, 0.51) | 84.84<br>(40.6,173.32)  | 0.26<br>(0.2, 0.32)  | 281.6<br>(143.13,490.15)  | 0.01<br>(0, 0.01)      | 817.2<br>(490.38,1241.53)   | 0.19<br>(0.16, 0.23)    |

|                        |                        |                      |                         |                      |                           |                         |                             |                         |
|------------------------|------------------------|----------------------|-------------------------|----------------------|---------------------------|-------------------------|-----------------------------|-------------------------|
| Republic of Korea      | 33.71<br>(18.09,56.35) | 0.84<br>(0.78, 0.9)  | 103.1<br>(46.38,212.19) | 0.32<br>(0.24, 0.41) | 265.03<br>(132.43,466.25) | -0.05<br>(-0.08, -0.01) | 1357.08<br>(816.26,2055.79) | -0.27<br>(-0.3, -0.23)  |
| Republic of Latvia     | 46.89<br>(25.09,76.17) | 0.93<br>(0.86, 1.01) | 88.37<br>(39.88,182.82) | 0.63<br>(0.59, 0.67) | 307.31<br>(154.58,547.4)  | 0.01<br>(0.01, 0.02)    | 1263.49<br>(761.32,1929.74) | -0.04<br>(-0.05, -0.02) |
| Republic of Liberia    | 11.53<br>(5.35,20.33)  | 0.98<br>(0.8, 1.16)  | 61.56<br>(28.77,128.61) | 0.59<br>(0.53, 0.65) | 467.63<br>(235.98,807)    | 0.02<br>(0.02, 0.02)    | 800.57<br>(485.24,1211.11)  | -0.08<br>(-0.09, -0.07) |
| Republic of Lithuania  | 57.96<br>(32.2,94.98)  | 0.58<br>(0.5, 0.66)  | 87<br>(39.35,179.95)    | 0.65<br>(0.61, 0.69) | 307.46<br>(153.34,547.69) | 0.01<br>(0, 0.01)       | 1245.26<br>(754.7,1880.19)  | -0.1<br>(-0.11, -0.08)  |
| Republic of Madagascar | 9.3 (4.38,16.11)       | 0.44<br>(0.39, 0.48) | 49.13<br>(22.88,101.76) | 0.15<br>(0.13, 0.17) | 270.22<br>(135.36,483.86) | 0.03<br>(0.02, 0.03)    | 889.37<br>(535.19,1361.8)   | -0.3<br>(-0.33, -0.27)  |
| Republic of Malawi     | 10.71<br>(4.95,18.99)  | 0.62<br>(0.57, 0.68) | 53.79<br>(25.14,108.46) | 0.36<br>(0.34, 0.39) | 267.95<br>(131.99,474.07) | 0.06<br>(0.05, 0.07)    | 874.55<br>(525.47,1339.48)  | -0.04<br>(-0.06, -0.02) |
| Republic of Maldives   | 16.78<br>(7.71,30.08)  | 0.72<br>(0.32, 1.11) | 74.6<br>(34.02,152.47)  | 0.59<br>(0.57, 0.62) | 261.85<br>(128.64,463.42) | 0.02<br>(0.01, 0.03)    | 698.2<br>(419.89,1052.48)   | -0.1<br>(-0.11, -0.09)  |
| Republic of Mali       | 9.37<br>(4.42,16.45)   | 0.79<br>(0.72, 0.85) | 56.07<br>(26.18,113.82) | 0.42<br>(0.4, 0.43)  | 475.68<br>(241.58,825.58) | 0.02<br>(0.01, 0.02)    | 766.13<br>(460.35,1167.35)  | 0.13<br>(0.1, 0.16)     |
| Republic of Malta      | 36.98<br>(19.17,63.05) | 0.63<br>(0.56, 0.69) | 76.17<br>(34.85,157.16) | 0.23<br>(0.2, 0.26)  | 387.89<br>(198.83,662.78) | 0<br>(-0.01, 0)         | 1270.42<br>(778.36,1914)    | -0.08<br>(-0.1, -0.06)  |
| Republic of Mauritius  | 13.13<br>(6.06,23.56)  | 1.27<br>(1.23, 1.3)  | 76.6<br>(35.45,159.5)   | 0.49<br>(0.47, 0.5)  | 262.23<br>(130.67,454.31) | 0<br>(0, 0)             | 760.19<br>(462.31,1154.12)  | -0.15<br>(-0.21, -0.09) |
| Republic of Moldova    | 24.17<br>(11.67,41.41) | 1.3<br>(1.14, 1.46)  | 76.83<br>(34.74,162.37) | 0.76<br>(0.66, 0.86) | 307.53<br>(152.38,543.52) | 0.01<br>(0.01, 0.02)    | 1277.47<br>(782.3,1926.31)  | -0.1<br>(-0.12, -0.08)  |
| Republic of Mozambique | 9.64<br>(4.69,16.71)   | 0.49<br>(0.44, 0.55) | 51.71<br>(24.02,105.72) | 0.31<br>(0.28, 0.33) | 263.28<br>(130.49,467.57) | -0.02<br>(-0.02, -0.01) | 920.23<br>(556.47,1385.66)  | -0.06<br>(-0.07, -0.04) |
| Republic of Namibia    | 21.96<br>(10.87,37.08) | 0.57<br>(0.46, 0.67) | 60.29<br>(27.62,123.94) | 0.43<br>(0.4, 0.46)  | 377.39<br>(191.01,655.67) | -0.01<br>(-0.01, 0)     | 734.72<br>(443.97,1126.96)  | 0.06<br>(0.03, 0.09)    |
| Republic of Nauru      | 14.54<br>(6.5,26.37)   | 0.62<br>(0.42, 0.82) | 90.14<br>(41.97,183.71) | 0.4<br>(0.37, 0.43)  | 282.71<br>(141.14,495.29) | -0.01<br>(-0.01, 0)     | 823.06<br>(494.25,1252.92)  | 0.04<br>(0.02, 0.05)    |
| Republic of            | 38.84                  | 1.17                 | 72.62                   | 0.51                 | 335.51                    | 0                       | 1216.33                     | -0.04                   |

|                          |                          |                      |                          |                      |                           |                         |                              |                         |
|--------------------------|--------------------------|----------------------|--------------------------|----------------------|---------------------------|-------------------------|------------------------------|-------------------------|
| Nicaragua                | (20.86,63.13)            | (1.08, 1.25)         | (33.73,148.7)            | (0.48, 0.54)         | (165.08,593.41)           | (0, 0.01)               | (744.28,1864.94)             | (-0.05, -0.02)          |
| Republic of Niue         | 14.41<br>(6.52,26.21)    | 1.07<br>(1.05, 1.09) | 94.52<br>(43.43,190.25)  | 0.48<br>(0.44, 0.53) | 282.87<br>(141.08,499.73) | -0.01<br>(-0.01, -0.01) | 790.48<br>(474.73,1191.65)   | 0.01<br>(-0.01, 0.02)   |
| Republic of Palau        | 16.07<br>(7.09,28.45)    | 0.89<br>(0.83, 0.95) | 94.63<br>(43.35,196.04)  | 0.41<br>(0.36, 0.47) | 282.96<br>(142.33,498.95) | 0<br>(-0.01, 0)         | 791.23<br>(478.92,1204.28)   | 0.01<br>(-0.01, 0.02)   |
| Republic of Panama       | 34.65<br>(18.16,57.62)   | 0.96<br>(0.92, 0.99) | 77.18<br>(35.51,158.6)   | 0.5<br>(0.49, 0.52)  | 335.72<br>(167.72,591.55) | 0<br>(-0.01, 0)         | 1186.83<br>(720.36,1803.09)  | -0.05<br>(-0.06, -0.03) |
| Republic of Paraguay     | 61.06<br>(33.47,99.78)   | 1.48<br>(1.39, 1.58) | 76.39<br>(34.64,155.13)  | 0.22<br>(0.16, 0.28) | 333.59<br>(164.07,588.19) | 0<br>(-0.01, 0)         | 1121.52<br>(681.44,1707.71)  | 0.09<br>(0, 0.19)       |
| Republic of Peru         | 111.54<br>(66.15,174.18) | 1.82<br>(1.7, 1.93)  | 85.76<br>(40.02,176.77)  | 0.37<br>(0.35, 0.39) | 335.8<br>(165.85,590.35)  | 0.01<br>(0, 0.02)       | 748.32<br>(448.26,1145.23)   | 0.15<br>(0.12, 0.18)    |
| Republic of Poland       | 41.35<br>(24.62,64.64)   | 0.13<br>(0.04, 0.23) | 69.81<br>(31.31,146.66)  | 0.62<br>(0.59, 0.66) | 358.83<br>(181.36,641.29) | 0.02<br>(0.02, 0.02)    | 1646.65<br>(1022.03,2444.36) | -0.18<br>(-0.19, -0.16) |
| Republic of Rwanda       | 11.21<br>(5.03,20.09)    | 0.77<br>(0.66, 0.87) | 50.98<br>(23.97,105.66)  | 0.28<br>(0.25, 0.32) | 268.72<br>(133.43,476.78) | 0.02<br>(0.01, 0.03)    | 953.1<br>(573.17,1457.88)    | -0.13<br>(-0.15, -0.12) |
| Republic of San Marino   | 29.89<br>(15.23,50.43)   | 0.41<br>(0.35, 0.48) | 76.42<br>(35.19,156.02)  | 0.17<br>(0.15, 0.19) | 387.63<br>(199.11,659.98) | -0.01<br>(-0.01, -0.01) | 1160.05<br>(702.73,1756.27)  | -0.12<br>(-0.13, -0.11) |
| Republic of Senegal      | 10.61 (5,19.09)          | 0.62<br>(0.54, 0.7)  | 60.85<br>(27.82,125.17)  | 0.34<br>(0.33, 0.35) | 475.95<br>(241.35,819.63) | 0.02<br>(0.02, 0.02)    | 749.4<br>(450.78,1138.02)    | -0.11<br>(-0.15, -0.07) |
| Republic of Serbia       | 25.42<br>(12.66,43.95)   | 1.3<br>(1.05, 1.54)  | 69.16<br>(31.43,146.48)  | 0.55<br>(0.53, 0.58) | 308.62<br>(153.25,546.79) | 0.01<br>(0, 0.01)       | 1680.95<br>(1041.6,2544.21)  | 0.03<br>(0.02, 0.04)    |
| Republic of Seychelles   | 10.36<br>(5.03,17.79)    | 0.9<br>(0.86, 0.94)  | 78.58<br>(36.74,165.29)  | 0.5<br>(0.46, 0.55)  | 263.22<br>(129.19,458.46) | 0<br>(0, 0)             | 717.12<br>(431.37,1098.77)   | -0.1<br>(-0.1, -0.09)   |
| Republic of Sierra Leone | 9.78 (4.61,16.9)         | 0.57<br>(0.44, 0.69) | 58.1<br>(26.86,117.97)   | 0.48<br>(0.43, 0.52) | 476.66<br>(238.88,817.95) | 0.01<br>(0.01, 0.01)    | 820.37<br>(499.53,1249.04)   | -0.17<br>(-0.19, -0.16) |
| Republic of Singapore    | 26.45<br>(12.66,46.4)    | 0.98<br>(0.91, 1.06) | 102.09<br>(46.02,213.75) | 0.17<br>(0.16, 0.18) | 266.29<br>(132.71,467.65) | 0.01<br>(0.01, 0.01)    | 1123.5<br>(683.89,1710.45)   | -0.2<br>(-0.26, -0.13)  |
| Republic of Slovenia     | 37.81<br>(19.67,64.64)   | 1.17<br>(1.12, 1.22) | 75.15<br>(34.44,158.8)   | 0.35<br>(0.32, 0.38) | 308.19<br>(151.51,544.78) | 0.01<br>(0, 0.01)       | 1509.27<br>(921.09,2280.88)  | -0.03<br>(-0.05, 0)     |

|                                  |                        |                         |                         |                      |                           |                         |                             |                         |
|----------------------------------|------------------------|-------------------------|-------------------------|----------------------|---------------------------|-------------------------|-----------------------------|-------------------------|
| Republic of South Africa         | 46.98<br>(29.62,70.65) | -0.66<br>(-0.77, -0.55) | 64.89<br>(29.7,134.89)  | 0.28<br>(0.26, 0.3)  | 426.4<br>(215.89,744.04)  | -0.05<br>(-0.05, -0.04) | 701.63<br>(430.68,1054.06)  | -0.32<br>(-0.36, -0.27) |
| Republic of South Sudan          | 10.22<br>(4.79,18.22)  | 0.59<br>(0.53, 0.65)    | 50.31<br>(23.38,103.61) | 0.17<br>(0.16, 0.18) | 268.08<br>(133.77,479.09) | 0.02<br>(0.01, 0.02)    | 869.48<br>(530.61,1326.52)  | -0.11<br>(-0.13, -0.1)  |
| Republic of Sudan                | 20.18<br>(9.84,34.88)  | 1.51<br>(1.37, 1.64)    | 61.21<br>(28.78,127.08) | 0.87<br>(0.82, 0.93) | 575.38<br>(294.1,987.47)  | 0.01<br>(0.01, 0.02)    | 1196.45<br>(735.36,1807.11) | 0.01<br>(0, 0.03)       |
| Republic of Suriname             | 16.61<br>(8.07,29.29)  | 0.86<br>(0.77, 0.96)    | 80.55<br>(37.47,169.45) | 0.31<br>(0.3, 0.33)  | 332.96<br>(166.44,590.37) | -0.01<br>(-0.01, 0)     | 841.64<br>(513.81,1276.66)  | 0.07<br>(0.05, 0.09)    |
| Republic of Tajikistan           | 29.09<br>(14.95,48.83) | 0.64<br>(0.58, 0.69)    | 59.54<br>(27.02,126.82) | 0.48<br>(0.42, 0.54) | 307.62<br>(151.64,545.8)  | 0.01<br>(0, 0.01)       | 1047.82<br>(636.8,1591.68)  | -0.13<br>(-0.14, -0.12) |
| Republic of the Congo            | 19.77<br>(9.48,34.53)  | 0.9<br>(0.83, 0.97)     | 68.6<br>(30.82,141.52)  | 0.32<br>(0.29, 0.35) | 375.89<br>(189.63,647.68) | 0.01<br>(0, 0.02)       | 845.32<br>(505.74,1283.28)  | -0.03<br>(-0.05, -0.02) |
| Republic of the Gambia           | 10.55<br>(4.76,18.91)  | 0.77<br>(0.69, 0.84)    | 64.04<br>(29.14,132.87) | 0.57<br>(0.55, 0.58) | 473.01<br>(239.87,812.15) | 0<br>(0, 0)             | 776.25<br>(469.19,1176.59)  | -0.12<br>(-0.16, -0.09) |
| Republic of the Marshall Islands | 12.36<br>(5.71,22.05)  | 0.85<br>(0.79, 0.9)     | 86.32<br>(39.85,178.77) | 0.42<br>(0.38, 0.46) | 281.9<br>(139.3,492.99)   | -0.01<br>(-0.02, -0.01) | 756.95<br>(454.98,1162.97)  | -0.08<br>(-0.09, -0.07) |
| Republic of the Niger            | 8.72<br>(4.24,15.05)   | 0.57<br>(0.49, 0.65)    | 51.81<br>(24.14,104.47) | 0.2<br>(0.19, 0.21)  | 476.88<br>(242.45,814.9)  | 0.02<br>(0.02, 0.03)    | 855.11<br>(515.76,1313.5)   | 0.16<br>(0.12, 0.2)     |
| Republic of the Philippines      | 13.08<br>(7.87,20.41)  | -0.06<br>(-0.17, 0.06)  | 58.84<br>(27.24,120.15) | 0.42<br>(0.38, 0.45) | 305.5<br>(154.52,542.06)  | 0.01<br>(0.01, 0.01)    | 851<br>(517.02,1284.42)     | -0.26<br>(-0.29, -0.22) |
| Republic of the Union of Myanmar | 10.34<br>(4.76,18.4)   | 1.1<br>(1.03, 1.18)     | 64.43<br>(29.92,133.92) | 0.68<br>(0.65, 0.72) | 262.91<br>(129.92,465.59) | 0.02<br>(0.01, 0.02)    | 651.95<br>(388.83,994.83)   | -0.05<br>(-0.07, -0.02) |
| Republic of Trinidad and Tobago  | 40.15<br>(21.55,65.89) | 1.17<br>(1.09, 1.24)    | 81.53<br>(37.58,168.79) | 0.36<br>(0.34, 0.38) | 333.88<br>(167.52,595.37) | 0<br>(0, 0.01)          | 848.13<br>(519.76,1297.41)  | 0<br>(-0.01, 0.01)      |
| Republic of Tunisia              | 25.3<br>(12.34,42.52)  | 1.38<br>(1.27, 1.49)    | 69.18<br>(31.69,142.84) | 0.61<br>(0.59, 0.63) | 575.41<br>(291.67,991.09) | -0.01<br>(-0.01, 0)     | 1255.14<br>(764.92,1887.56) | 0.08<br>(0.04, 0.12)    |
| Republic of Turkey               | 44.25<br>(23.98,72.4)  | 1.37<br>(1.31, 1.44)    | 71.37<br>(33.23,147.51) | 0.75<br>(0.68, 0.82) | 577.87<br>(294.82,991.44) | 0<br>(0, 0)             | 1168.25<br>(716.67,1775.99) | 0.2<br>(0.1, 0.31)      |

|                                  |                         |                         |                         |                        |                           |                      |                              |                         |
|----------------------------------|-------------------------|-------------------------|-------------------------|------------------------|---------------------------|----------------------|------------------------------|-------------------------|
| Republic of Uganda               | 10.06<br>(4.82,17.74)   | 0.75<br>(0.65, 0.85)    | 52.53<br>(24.05,108.29) | 0.33<br>(0.31, 0.34)   | 268.93<br>(132.55,479.35) | 0.04<br>(0.04, 0.05) | 904.87<br>(547.6,1382.6)     | -0.11<br>(-0.13, -0.1)  |
| Republic of Uzbekistan           | 63.33<br>(36.14,100.63) | 0.86<br>(0.78, 0.93)    | 69.8<br>(31.81,145.59)  | 0.53<br>(0.49, 0.58)   | 307.1<br>(152.08,544.57)  | 0.01<br>(0.01, 0.01) | 1111.46<br>(674.35,1674.14)  | 0<br>(-0.02, 0.02)      |
| Republic of Vanuatu              | 11.03<br>(4.96,19.69)   | 0.72<br>(0.68, 0.76)    | 74.24<br>(34.76,153.3)  | 0.39<br>(0.38, 0.41)   | 282.88<br>(140.85,493.06) | 0<br>(0, 0)          | 876.51<br>(527.5,1334.18)    | 0.03<br>(-0.01, 0.06)   |
| Republic of Yemen                | 15.24 (7.3,26.2)        | 0.9<br>(0.82, 0.98)     | 55.72<br>(25.75,113.51) | 0.84<br>(0.79, 0.89)   | 568.9<br>(289.65,976.34)  | 0.01<br>(0.01, 0.02) | 1171.03<br>(716.36,1764.81)  | -0.15<br>(-0.17, -0.14) |
| Republic of Zambia               | 11.21<br>(5.12,19.89)   | 0.64<br>(0.53, 0.74)    | 56.51<br>(26.24,115.42) | 0.09<br>(0.01, 0.16)   | 267.81<br>(133.56,474.45) | 0.01<br>(0, 0.02)    | 808.11<br>(487.94,1241.5)    | 0.22<br>(0.15, 0.29)    |
| Republic of Zimbabwe             | 15.62<br>(7.34,26.65)   | -0.24<br>(-0.38, -0.09) | 52.2<br>(23.89,106.84)  | -0.01<br>(-0.06, 0.04) | 376.35<br>(188.54,650.29) | -0.01<br>(-0.01, 0)  | 788.82<br>(476.96,1204.1)    | 0.27<br>(0.25, 0.3)     |
| Romania                          | 22.75<br>(11.35,39.33)  | 1.3<br>(1.21, 1.4)      | 66.96<br>(30.9,138.6)   | 0.48<br>(0.45, 0.51)   | 308.57<br>(152.89,546.88) | 0.02<br>(0.01, 0.02) | 1687.55<br>(1032.93,2544.29) | -0.22<br>(-0.24, -0.2)  |
| Russian Federation               | 40.81<br>(25.38,60.79)  | 0.75<br>(0.69, 0.81)    | 79.95<br>(36.05,168.44) | 0.28<br>(0.16, 0.41)   | 356.09<br>(177.65,637.35) | 0.01<br>(0, 0.01)    | 1325<br>(817.95,1979.6)      | 0<br>(-0.05, 0.04)      |
| Saint Kitts and Nevis            | 32.25<br>(16.04,53.93)  | 1.12<br>(0.99, 1.25)    | 82.54<br>(38.26,168.5)  | 0.39<br>(0.37, 0.4)    | 335.31<br>(167.22,595.29) | 0.02<br>(0.01, 0.02) | 827.79<br>(499.85,1261.4)    | -0.03<br>(-0.04, -0.02) |
| Saint Lucia                      | 28.68<br>(14.43,48.95)  | 1.1<br>(0.95, 1.26)     | 78.17<br>(35.57,159.97) | 0.48<br>(0.44, 0.53)   | 334.58<br>(167.18,598.94) | 0<br>(0, 0)          | 853.78<br>(508.84,1299.88)   | -0.1<br>(-0.1, -0.09)   |
| Saint Vincent and the Grenadines | 19.84<br>(9.31,34.69)   | 1.02<br>(0.97, 1.06)    | 76.71<br>(35.25,156.8)  | 0.49<br>(0.47, 0.51)   | 334.43<br>(166.34,591.65) | 0<br>(-0.01, 0)      | 833.1<br>(502.11,1273.78)    | 0.02<br>(0.01, 0.03)    |
| Slovak Republic                  | 24.44<br>(11.93,41.93)  | 1.04<br>(0.97, 1.1)     | 76.07<br>(34.07,162.34) | 0.34<br>(0.31, 0.37)   | 308.26<br>(153.99,544.05) | 0.01<br>(0, 0.01)    | 1703.54<br>(1035.33,2570.44) | -0.07<br>(-0.08, -0.06) |
| Socialist Republic of Viet Nam   | 16.32<br>(7.46,28.85)   | 1.11<br>(1.04, 1.17)    | 61.22<br>(28.55,125.2)  | 0.58<br>(0.55, 0.6)    | 264.9<br>(130.2,468.47)   | 0.01<br>(0.01, 0.02) | 790.92<br>(465.5,1220.67)    | 0.17<br>(0.15, 0.19)    |
| Solomon Islands                  | 12.82<br>(6.16,22.53)   | 0.83<br>(0.77, 0.9)     | 79.59<br>(36.23,162.25) | 0.47<br>(0.44, 0.5)    | 282.5<br>(140.31,495.66)  | 0<br>(0, 0.01)       | 840.51<br>(509.56,1285.89)   | 0.28<br>(0.25, 0.31)    |
| State of Eritrea                 | 8.94 (4.16,15.9)        | 0.44                    | 52.1                    | 0.34                   | 270.19                    | 0.02                 | 795.19                       | 0.1                     |

|                            |                         |                       |                         |                       |                           |                         |                             |                         |
|----------------------------|-------------------------|-----------------------|-------------------------|-----------------------|---------------------------|-------------------------|-----------------------------|-------------------------|
|                            |                         | (0.4, 0.48)           | (24.13,107.25)          | (0.33, 0.35)          | (135.4,487.44)            | (0.02, 0.03)            | (480.17,1212.9)             | (0.09, 0.12)            |
| State of Israel            | 35.12<br>(18.43,58.98)  | 0.83<br>(0.79, 0.88)  | 75.76<br>(35.03,156.6)  | 0.05<br>(-0.04, 0.13) | 389.96<br>(201.9,667.9)   | 0<br>(0, 0)             | 1232.95<br>(749.33,1864.93) | -0.12<br>(-0.16, -0.08) |
| State of Kuwait            | 79.03<br>(46.12,124.29) | 1.45<br>(1.3, 1.59)   | 77.85<br>(35.94,162.54) | 0.46<br>(0.43, 0.48)  | 577.59<br>(294.47,990.64) | -0.01<br>(-0.01, 0)     | 1209.03<br>(725.88,1808.24) | 0.07<br>(0.05, 0.08)    |
| State of Libya             | 25.89<br>(13.27,43.78)  | 1.26<br>(1.17, 1.34)  | 71.73<br>(32.83,146.92) | 0.43<br>(0.38, 0.47)  | 574.78<br>(295.48,981.18) | -0.01<br>(-0.02, -0.01) | 1176.54<br>(713.68,1795.73) | -0.05<br>(-0.06, -0.05) |
| State of Qatar             | 44.22<br>(23.58,74.61)  | 1.94<br>(1.83, 2.06)  | 79.2<br>(37.2,163.52)   | 0.36<br>(0.34, 0.39)  | 576.4<br>(295.88,993.27)  | 0<br>(0, 0.01)          | 1212.87<br>(741.9,1842.33)  | 0.1<br>(0.09, 0.11)     |
| Sultanate of Oman          | 27.45<br>(13.96,47.22)  | 2<br>(1.91, 2.09)     | 74.54<br>(34.37,154.56) | 0.71<br>(0.68, 0.75)  | 577.77<br>(293.4,994.22)  | 0<br>(0, 0.01)          | 1156.11<br>(700.85,1742.87) | -0.05<br>(-0.06, -0.04) |
| Swiss Confederation        | 38.73<br>(20.06,64.17)  | 0.55<br>(0.52, 0.59)  | 73.57<br>(34.1,151.38)  | 0.17<br>(0.16, 0.18)  | 387.42<br>(196.71,664.66) | 0<br>(0, 0.01)          | 1259.8<br>(771.09,1900.53)  | -0.19<br>(-0.34, -0.04) |
| Syrian Arab Republic       | 25.86<br>(13.13,44.08)  | 1.36<br>(1.29, 1.43)  | 67.16<br>(30.73,138.3)  | 0.67<br>(0.64, 0.71)  | 574.57<br>(293.51,990.88) | 0<br>(-0.01, 0)         | 1190.7<br>(721.12,1813.33)  | -0.1<br>(-0.11, -0.08)  |
| Taiwan (Province of China) | 18.42<br>(10.16,28.81)  | 0.21<br>(-0.06, 0.47) | 108.76<br>(50.21,226.7) | 0.49<br>(0.47, 0.5)   | 287.99<br>(186.12,415.98) | -0.31<br>(-0.39, -0.23) | 870.95<br>(608.24,1185.35)  | -0.02<br>(-0.03, 0)     |
| Togolese Republic          | 10.13<br>(4.95,17.4)    | 0.7<br>(0.58, 0.81)   | 59.59<br>(27.61,123.58) | 0.43<br>(0.4, 0.46)   | 476.39<br>(241.29,820.14) | 0.02<br>(0.01, 0.02)    | 817.7<br>(488.44,1235.1)    | -0.22<br>(-0.28, -0.17) |
| Tokelau                    | 13.5<br>(6.17,24.16)    | 1.22<br>(1.19, 1.26)  | 90.12<br>(41.32,187.79) | 0.65<br>(0.62, 0.69)  | 283.25<br>(139.25,502.35) | 0<br>(0, 0)             | 797.6<br>(478.42,1218.66)   | 0.03<br>(0.02, 0.05)    |
| Turkmenistan               | 18.14<br>(8.6,31.88)    | 1.22<br>(1.08, 1.37)  | 71.06<br>(32.51,146.38) | 0.76<br>(0.69, 0.82)  | 307.87<br>(152.17,544.79) | 0.01<br>(0.01, 0.02)    | 1083.15<br>(660.53,1647.52) | -0.06<br>(-0.07, -0.05) |
| Tuvalu                     | 12.42<br>(5.81,21.62)   | 1.04<br>(1.02, 1.06)  | 87.82<br>(40.29,180.02) | 0.6<br>(0.56, 0.64)   | 283.53<br>(142.56,505.62) | 0.03<br>(0.02, 0.04)    | 806.57<br>(487,1228.41)     | 0.07<br>(0.05, 0.1)     |
| Ukraine                    | 17.6 (8.35,30.5)        | 0.87<br>(0.83, 0.91)  | 73.72<br>(32.87,152)    | 0.49<br>(0.46, 0.52)  | 355.91<br>(177.25,640.1)  | 0.01<br>(0.01, 0.02)    | 1565.19<br>(967.52,2349.83) | -0.12<br>(-0.17, -0.08) |
| Union of the Comoros       | 11.28<br>(4.97,20.1)    | 0.56<br>(0.49, 0.62)  | 57.27<br>(26.61,119.04) | 0.41<br>(0.39, 0.44)  | 270.69<br>(132.67,487.8)  | 0.02<br>(0.02, 0.02)    | 864.44<br>(518.11,1308.42)  | -0.03<br>(-0.06, -0.01) |

|                                                      |                         |                      |                         |                       |                           |                         |                             |                         |
|------------------------------------------------------|-------------------------|----------------------|-------------------------|-----------------------|---------------------------|-------------------------|-----------------------------|-------------------------|
| United Arab Emirates                                 | 39.96<br>(21.28,66.05)  | 1.67<br>(1.49, 1.86) | 76.05<br>(34.81,157.05) | 0.52<br>(0.49, 0.54)  | 575.94<br>(298.79,986.03) | 0<br>(0, 0)             | 1133.67<br>(688.45,1732.59) | 0.12<br>(0.09, 0.15)    |
| United Kingdom of Great Britain and Northern Ireland | 58.53<br>(36.9,87.99)   | 0.27<br>(0.24, 0.31) | 76.46<br>(35.38,156.94) | 0.24<br>(0.12, 0.36)  | 465.74<br>(240.43,803.6)  | 0.06<br>(0, 0.12)       | 1210.46<br>(747.22,1806.92) | -0.17<br>(-0.19, -0.14) |
| United Mexican States                                | 79.04<br>(49.79,117.83) | 0.54<br>(0.39, 0.69) | 75.01<br>(34.61,153.22) | 0.55<br>(0.52, 0.58)  | 386.95<br>(195.55,680.86) | -0.01<br>(-0.02, -0.01) | 1188.6<br>(727.59,1786.53)  | -0.03<br>(-0.15, 0.09)  |
| United Republic of Tanzania                          | 10.96<br>(5.02,19.05)   | 0.65<br>(0.58, 0.71) | 56.11<br>(25.74,112.88) | 0.02<br>(-0.04, 0.08) | 268.59<br>(133.03,481.25) | 0.06<br>(0.05, 0.07)    | 883.05<br>(532.18,1346.25)  | -0.02<br>(-0.04, 0)     |
| United States of America                             | 40<br>(26.18,57.92)     | 0.97<br>(0.84, 1.1)  | 94.42<br>(44.21,193.9)  | 0.54<br>(0.39, 0.68)  | 341.37<br>(173.17,604.96) | -0.19<br>(-0.38, 0)     | 1406.79<br>(944.62,1956.58) | -0.12<br>(-0.2, -0.04)  |
| United States Virgin Islands                         | 25.07<br>(12.12,42.86)  | 0.93<br>(0.89, 0.96) | 86.1<br>(39.64,175.77)  | 0.3<br>(0.27, 0.33)   | 335.67<br>(167.24,602.43) | -0.01<br>(-0.01, 0)     | 842.31<br>(505.41,1281.47)  | 0.02<br>(0, 0.03)       |

The values in parentheses in the 2021 column represent the 95% uncertainty intervals, while the values in parentheses in the EAPC column represent the 95% confidence intervals. EAPC, estimated annual percentage changes.

**Table S5. The proportion of years lived with disability from four common musculoskeletal diseases in women of reproductive age across different age groups globally in 1990 and 2021**

| Diseases             | Age group (years) |        |        |        |        |        |        |
|----------------------|-------------------|--------|--------|--------|--------|--------|--------|
|                      | 15-19             | 20-24  | 25-29  | 30-34  | 35-39  | 40-44  | 45-49  |
| <b>1990</b>          |                   |        |        |        |        |        |        |
| Rheumatoid arthritis | 0.76%             | 1.16%  | 1.51%  | 1.78%  | 1.97%  | 2.05%  | 2.07%  |
| Osteoarthritis       | 0.00%             | 0.00%  | 0.00%  | 0.63%  | 3.24%  | 7.39%  | 12.38% |
| Neck pain            | 17.25%            | 21.01% | 22.22% | 21.97% | 21.50% | 21.34% | 20.28% |
| Low back pain        | 81.99%            | 77.83% | 76.27% | 75.63% | 73.29% | 69.22% | 65.27% |
| <b>2021</b>          |                   |        |        |        |        |        |        |
| Rheumatoid arthritis | 0.91%             | 1.42%  | 1.91%  | 2.33%  | 2.44%  | 2.43%  | 2.45%  |
| Osteoarthritis       | 0.00%             | 0.00%  | 0.00%  | 0.78%  | 3.89%  | 8.70%  | 14.62% |
| Neck pain            | 18.26%            | 22.03% | 23.50% | 23.87% | 23.25% | 23.29% | 22.05% |
| Low back pain        | 80.83%            | 76.55% | 74.60% | 73.02% | 70.42% | 65.59% | 60.88% |

**Table S6. The effective disparities between disability levels and frontier levels for women of reproductive age due to rheumatoid arthritis, osteoarthritis, neck pain, and low back pain in 204 countries or territories from 1990 to 2021**

| Location                                     | SDI  | Rheumatoid arthritis |          | Osteoarthritis |          | Neck pain |          | Low back pain |          |
|----------------------------------------------|------|----------------------|----------|----------------|----------|-----------|----------|---------------|----------|
|                                              |      | Frontier             | eff_diff | Frontier       | eff_diff | Frontier  | eff_diff | Frontier      | eff_diff |
| American Samoa                               | 0.72 | 4.95                 | 11.35    | 44.77          | 51.36    | 134.89    | 147.17   | 577.93        | 227.84   |
| Antigua and Barbuda                          | 0.75 | 4.95                 | 20.61    | 44.74          | 35.87    | 135.87    | 199.32   | 578.01        | 250.58   |
| Arab Republic of Egypt                       | 0.61 | 4.94                 | 24.99    | 44.78          | 22.65    | 134.79    | 443.67   | 608.47        | 617.37   |
| Argentine Republic                           | 0.72 | 4.94                 | 38.39    | 44.75          | 38.25    | 134.64    | 143.34   | 577.37        | 959.38   |
| Australia                                    | 0.84 | 4.95                 | 37.86    | 44.75          | 42.03    | 70.91     | 102.25   | 577.79        | 1292.29  |
| Barbados                                     | 0.75 | 4.95                 | 33.53    | 44.75          | 37.85    | 135.40    | 199.67   | 577.29        | 258.96   |
| Belize                                       | 0.61 | 4.95                 | 27.80    | 44.75          | 35.38    | 135.12    | 200.07   | 603.37        | 255.34   |
| Bermuda                                      | 0.82 | 4.95                 | 27.69    | 44.77          | 41.50    | 70.90     | 266.06   | 577.65        | 279.78   |
| Bolivarian Republic of Venezuela             | 0.60 | 4.95                 | 49.40    | 44.78          | 33.79    | 135.21    | 200.95   | 611.66        | 465.30   |
| Bosnia and Herzegovina                       | 0.72 | 4.95                 | 32.99    | 44.76          | 22.92    | 134.95    | 173.22   | 577.15        | 1002.07  |
| Brunei Darussalam                            | 0.81 | 4.95                 | 29.81    | 44.76          | 56.09    | 70.91     | 194.41   | 577.25        | 732.29   |
| Burkina Faso                                 | 0.29 | 6.98                 | 3.02     | 44.75          | 8.44     | 165.77    | 312.49   | 728.41        | 123.32   |
| Canada                                       | 0.87 | 4.95                 | 38.97    | 44.78          | 23.02    | 70.93     | 235.40   | 577.43        | 678.31   |
| Central African Republic                     | 0.31 | 6.98                 | 5.72     | 44.71          | 8.59     | 165.74    | 209.20   | 723.34        | 169.41   |
| Commonwealth of Dominica                     | 0.75 | 4.95                 | 20.12    | 44.76          | 32.54    | 135.40    | 199.70   | 577.37        | 272.01   |
| Commonwealth of the Bahamas                  | 0.81 | 4.95                 | 23.94    | 44.73          | 37.83    | 70.91     | 264.14   | 577.39        | 248.65   |
| Cook Islands                                 | 0.78 | 4.95                 | 8.49     | 44.75          | 52.92    | 108.91    | 174.44   | 577.17        | 243.22   |
| Czech Republic                               | 0.83 | 4.95                 | 30.42    | 44.76          | 31.27    | 70.95     | 237.18   | 577.79        | 1166.75  |
| Democratic People's Republic of Korea        | 0.89 | 4.95                 | 23.33    | 44.74          | 43.44    | 70.92     | 210.09   | 577.22        | 217.42   |
| Democratic Republic of Sao Tome and Principe | 0.51 | 5.01                 | 7.55     | 44.74          | 26.48    | 135.19    | 344.39   | 625.65        | 106.81   |
| Democratic Republic of the Congo             | 0.57 | 4.95                 | 7.78     | 44.79          | 11.51    | 134.82    | 241.14   | 612.87        | 282.62   |
| Democratic Republic of Timor-Leste           | 0.44 | 6.98                 | 1.78     | 44.74          | 17.32    | 135.67    | 127.90   | 647.07        | 69.84    |
| Democratic Socialist Republic of Sri Lanka   | 0.70 | 4.95                 | 3.40     | 44.80          | 22.90    | 135.96    | 126.96   | 577.84        | 154.53   |
| Dominican Republic                           | 0.62 | 4.95                 | 11.96    | 44.75          | 34.00    | 136.00    | 198.30   | 604.05        | 256.13   |
| Eastern Republic of Uruguay                  | 0.72 | 4.95                 | 32.72    | 44.74          | 37.33    | 135.85    | 142.52   | 577.47        | 981.87   |

|                                         |      |      |       |       |       |        |        |        |         |
|-----------------------------------------|------|------|-------|-------|-------|--------|--------|--------|---------|
| Federal Democratic Republic of Ethiopia | 0.36 | 6.98 | 2.79  | 44.78 | 15.23 | 165.79 | 144.64 | 651.22 | 234.88  |
| Federal Democratic Republic of Nepal    | 0.43 | 6.98 | 22.41 | 44.78 | 28.98 | 134.75 | 31.71  | 647.86 | 772.37  |
| Federal Republic of Germany             | 0.90 | 4.95 | 33.65 | 44.73 | 31.15 | 70.91  | 316.36 | 577.26 | 814.75  |
| Federal Republic of Nigeria             | 0.50 | 4.96 | 5.76  | 44.77 | 13.81 | 135.06 | 407.30 | 626.27 | 229.05  |
| Federal Republic of Somalia             | 0.08 | 8.79 | 0.34  | 48.11 | 1.44  | 266.63 | 1.83   | 896.15 | 3.82    |
| Federated States of Micronesia          | 0.59 | 4.94 | 9.81  | 44.79 | 42.91 | 135.75 | 146.94 | 612.69 | 209.83  |
| Federative Republic of Brazil           | 0.65 | 4.95 | 31.11 | 44.77 | 27.59 | 136.73 | 244.41 | 584.30 | 734.41  |
| French Republic                         | 0.84 | 4.95 | 23.67 | 44.80 | 30.06 | 70.92  | 227.10 | 577.64 | 663.12  |
| Gabonese Republic                       | 0.63 | 4.95 | 15.78 | 44.77 | 24.67 | 135.22 | 239.57 | 591.83 | 240.35  |
| Georgia                                 | 0.73 | 4.94 | 13.86 | 44.79 | 19.99 | 136.12 | 172.71 | 577.38 | 444.95  |
| Grand Duchy of Luxembourg               | 0.88 | 4.95 | 32.94 | 44.78 | 31.47 | 70.94  | 317.24 | 577.36 | 662.52  |
| Greenland                               | 0.83 | 4.95 | 21.53 | 44.75 | 24.85 | 70.92  | 232.71 | 577.41 | 639.44  |
| Grenada                                 | 0.67 | 4.95 | 16.89 | 44.74 | 32.57 | 136.33 | 198.04 | 578.58 | 264.21  |
| Guam                                    | 0.80 | 4.95 | 9.95  | 44.77 | 50.53 | 70.91  | 214.15 | 577.35 | 212.57  |
| Hashemite Kingdom of Jordan             | 0.73 | 4.95 | 25.61 | 44.77 | 29.22 | 136.57 | 438.84 | 577.63 | 619.79  |
| Hellenic Republic                       | 0.79 | 4.95 | 35.07 | 44.74 | 27.72 | 106.39 | 370.86 | 577.06 | 555.44  |
| Hungary                                 | 0.79 | 4.95 | 27.75 | 44.74 | 31.41 | 108.89 | 199.67 | 578.02 | 1240.53 |
| Independent State of Papua New Guinea   | 0.42 | 6.98 | 1.69  | 44.90 | 26.09 | 149.37 | 133.08 | 647.85 | 144.35  |
| Independent State of Samoa              | 0.59 | 4.95 | 9.41  | 44.74 | 44.45 | 137.03 | 146.31 | 611.52 | 205.78  |
| Ireland                                 | 0.87 | 4.95 | 50.37 | 44.76 | 30.56 | 70.91  | 316.34 | 577.37 | 642.27  |
| Islamic Republic of Afghanistan         | 0.34 | 6.97 | 11.14 | 44.79 | 6.82  | 165.74 | 405.02 | 654.37 | 530.02  |
| Islamic Republic of Iran                | 0.70 | 4.95 | 17.37 | 44.82 | 17.38 | 136.30 | 523.22 | 577.35 | 773.25  |
| Islamic Republic of Mauritania          | 0.50 | 5.06 | 8.21  | 44.75 | 20.03 | 135.67 | 342.80 | 627.29 | 166.54  |
| Islamic Republic of Pakistan            | 0.50 | 4.96 | 28.58 | 44.83 | 26.18 | 137.96 | 59.14  | 625.50 | 541.45  |
| Jamaica                                 | 0.68 | 4.95 | 20.67 | 44.79 | 32.21 | 135.89 | 199.95 | 577.30 | 293.09  |
| Japan                                   | 0.87 | 4.94 | 32.58 | 44.82 | 43.37 | 70.93  | 233.50 | 577.25 | 1091.37 |
| Kingdom of Bahrain                      | 0.75 | 4.95 | 57.01 | 44.81 | 31.44 | 116.07 | 460.31 | 577.57 | 595.69  |
| Kingdom of Belgium                      | 0.85 | 4.95 | 34.52 | 44.76 | 30.57 | 70.90  | 305.54 | 577.82 | 626.41  |
| Kingdom of Bhutan                       | 0.47 | 5.47 | 28.84 | 44.75 | 35.88 | 135.38 | 32.64  | 641.62 | 609.96  |

|                                         |      |      |       |       |       |        |        |        |         |
|-----------------------------------------|------|------|-------|-------|-------|--------|--------|--------|---------|
| Kingdom of Cambodia                     | 0.47 | 5.33 | 4.30  | 44.73 | 14.56 | 135.72 | 126.82 | 640.69 | 164.99  |
| Kingdom of Denmark                      | 0.90 | 4.94 | 33.60 | 44.74 | 27.93 | 70.92  | 391.26 | 577.37 | 765.65  |
| Kingdom of Eswatini                     | 0.59 | 4.95 | 23.22 | 44.73 | 20.73 | 137.19 | 234.04 | 612.54 | 22.88   |
| Kingdom of Lesotho                      | 0.51 | 4.96 | 18.94 | 44.74 | 16.67 | 137.48 | 232.67 | 623.60 | 52.63   |
| Kingdom of Morocco                      | 0.56 | 4.95 | 18.57 | 44.76 | 20.11 | 135.01 | 438.87 | 612.84 | 737.63  |
| Kingdom of Norway                       | 0.92 | 4.94 | 37.07 | 44.79 | 28.93 | 70.94  | 260.39 | 577.42 | 556.37  |
| Kingdom of Saudi Arabia                 | 0.82 | 4.95 | 23.96 | 44.75 | 31.81 | 70.91  | 505.89 | 577.29 | 610.37  |
| Kingdom of Spain                        | 0.77 | 4.95 | 25.85 | 44.77 | 33.17 | 108.92 | 211.05 | 577.60 | 403.42  |
| Kingdom of Sweden                       | 0.89 | 4.95 | 34.75 | 44.73 | 14.93 | 70.91  | 343.14 | 577.76 | 289.07  |
| Kingdom of Thailand                     | 0.68 | 4.94 | 8.06  | 44.82 | 27.84 | 135.38 | 128.49 | 577.28 | 100.16  |
| Kingdom of the Netherlands              | 0.89 | 4.94 | 39.02 | 44.80 | 31.64 | 70.90  | 273.97 | 577.30 | 464.46  |
| Kingdom of Tonga                        | 0.63 | 4.95 | 8.50  | 44.74 | 42.56 | 136.45 | 147.43 | 597.39 | 218.21  |
| Kyrgyz Republic                         | 0.60 | 4.95 | 55.94 | 44.84 | 23.43 | 135.29 | 172.78 | 608.24 | 506.13  |
| Lao People's Democratic Republic        | 0.49 | 5.01 | 5.12  | 44.75 | 16.82 | 135.85 | 127.67 | 633.03 | 122.30  |
| Lebanese Republic                       | 0.74 | 4.94 | 38.44 | 44.80 | 25.86 | 136.07 | 437.86 | 577.49 | 582.06  |
| Malaysia                                | 0.74 | 4.95 | 2.30  | 44.73 | 30.98 | 135.18 | 127.56 | 577.17 | 166.05  |
| Mongolia                                | 0.62 | 4.94 | 20.66 | 44.85 | 28.80 | 134.50 | 173.05 | 605.55 | 486.93  |
| Montenegro                              | 0.80 | 4.95 | 18.73 | 44.72 | 29.07 | 98.04  | 210.27 | 577.45 | 1069.28 |
| New Zealand                             | 0.85 | 4.95 | 42.64 | 44.76 | 33.98 | 70.92  | 38.43  | 577.33 | 1427.57 |
| North Macedonia                         | 0.75 | 4.95 | 17.21 | 44.77 | 24.37 | 135.70 | 171.96 | 577.21 | 924.77  |
| Northern Mariana Islands                | 0.77 | 4.94 | 10.58 | 44.75 | 48.91 | 108.90 | 175.75 | 577.21 | 228.06  |
| Palestine                               | 0.63 | 4.95 | 21.56 | 44.87 | 22.73 | 135.77 | 440.14 | 592.91 | 577.11  |
| People's Democratic Republic of Algeria | 0.66 | 4.94 | 15.11 | 44.77 | 25.71 | 135.45 | 442.18 | 582.53 | 591.12  |
| People's Republic of Bangladesh         | 0.49 | 5.01 | 24.11 | 44.88 | 32.69 | 136.56 | 29.98  | 632.75 | 634.85  |
| People's Republic of China              | 0.72 | 4.95 | 32.39 | 44.83 | 45.81 | 136.19 | 158.85 | 577.54 | 22.25   |
| Plurinational State of Bolivia          | 0.60 | 4.94 | 45.81 | 44.72 | 35.52 | 134.70 | 199.20 | 608.72 | 182.17  |
| Portuguese Republic                     | 0.74 | 4.95 | 43.21 | 44.81 | 29.49 | 136.30 | 251.10 | 577.17 | 699.59  |
| Principality of Andorra                 | 0.87 | 4.95 | 26.77 | 44.76 | 31.58 | 70.91  | 316.98 | 577.22 | 585.78  |
| Principality of Monaco                  | 0.91 | 4.95 | 26.57 | 44.71 | 32.82 | 70.92  | 316.63 | 577.45 | 579.05  |

|                               |      |      |       |       |       |        |        |        |         |
|-------------------------------|------|------|-------|-------|-------|--------|--------|--------|---------|
| Puerto Rico                   | 0.83 | 4.94 | 36.22 | 44.78 | 42.88 | 70.93  | 265.35 | 577.34 | 255.11  |
| Republic of Albania           | 0.71 | 4.95 | 20.27 | 44.75 | 14.21 | 135.59 | 172.71 | 577.46 | 1129.59 |
| Republic of Angola            | 0.45 | 6.98 | 7.14  | 44.80 | 26.46 | 136.17 | 240.50 | 645.46 | 237.24  |
| Republic of Armenia           | 0.70 | 4.95 | 17.30 | 44.82 | 23.68 | 135.73 | 172.46 | 577.36 | 624.68  |
| Republic of Austria           | 0.85 | 4.95 | 37.55 | 44.78 | 30.08 | 70.93  | 416.80 | 577.83 | 414.13  |
| Republic of Azerbaijan        | 0.69 | 4.95 | 11.58 | 44.80 | 25.73 | 135.25 | 172.91 | 577.24 | 548.00  |
| Republic of Belarus           | 0.78 | 4.95 | 17.31 | 44.75 | 41.54 | 108.90 | 198.53 | 577.46 | 716.69  |
| Republic of Benin             | 0.37 | 6.98 | 3.97  | 44.74 | 18.83 | 165.79 | 309.33 | 650.36 | 183.70  |
| Republic of Botswana          | 0.64 | 4.95 | 20.93 | 44.81 | 22.98 | 136.90 | 237.09 | 588.92 | 117.73  |
| Republic of Bulgaria          | 0.77 | 4.94 | 17.30 | 44.74 | 29.49 | 108.89 | 198.92 | 577.75 | 1004.53 |
| Republic of Burundi           | 0.29 | 6.98 | 2.18  | 44.77 | 5.36  | 165.78 | 103.94 | 728.94 | 175.05  |
| Republic of Cabo Verde        | 0.53 | 4.94 | 7.65  | 44.75 | 20.40 | 136.46 | 342.37 | 616.95 | 155.99  |
| Republic of Cameroon          | 0.48 | 4.97 | 7.44  | 44.79 | 18.98 | 135.68 | 340.39 | 638.58 | 228.30  |
| Republic of Chad              | 0.24 | 7.08 | 1.48  | 44.78 | 7.05  | 165.78 | 309.64 | 728.58 | 201.32  |
| Republic of Chile             | 0.77 | 4.95 | 55.08 | 44.81 | 37.78 | 108.93 | 168.32 | 577.93 | 982.81  |
| Republic of Colombia          | 0.66 | 4.94 | 38.87 | 44.76 | 33.22 | 134.18 | 202.37 | 584.27 | 739.64  |
| Republic of Costa Rica        | 0.70 | 4.95 | 50.54 | 44.75 | 33.94 | 135.77 | 199.45 | 577.90 | 604.51  |
| Republic of Croatia           | 0.80 | 4.95 | 32.84 | 44.82 | 27.38 | 78.94  | 229.31 | 577.93 | 975.46  |
| Republic of Cuba              | 0.67 | 4.95 | 37.53 | 44.74 | 32.58 | 135.26 | 201.15 | 578.18 | 203.79  |
| Republic of Cyprus            | 0.84 | 4.95 | 40.14 | 44.75 | 28.98 | 70.90  | 318.58 | 577.49 | 592.42  |
| Republic of Côte d'Ivoire     | 0.43 | 6.98 | 4.09  | 44.76 | 16.40 | 136.90 | 339.07 | 647.88 | 224.06  |
| Republic of Djibouti          | 0.49 | 4.96 | 5.46  | 44.77 | 18.15 | 137.02 | 133.30 | 632.20 | 178.07  |
| Republic of Ecuador           | 0.66 | 4.95 | 47.02 | 44.75 | 42.66 | 136.71 | 199.33 | 582.46 | 93.73   |
| Republic of El Salvador       | 0.56 | 4.94 | 21.80 | 44.75 | 32.67 | 136.24 | 199.59 | 612.82 | 580.23  |
| Republic of Equatorial Guinea | 0.66 | 4.94 | 14.50 | 44.76 | 25.21 | 135.69 | 239.24 | 582.60 | 276.47  |
| Republic of Estonia           | 0.84 | 4.95 | 52.03 | 44.80 | 46.57 | 70.92  | 236.38 | 577.17 | 696.06  |
| Republic of Fiji              | 0.68 | 4.95 | 4.89  | 44.79 | 45.34 | 135.21 | 147.81 | 577.91 | 198.34  |
| Republic of Finland           | 0.86 | 4.95 | 48.15 | 44.75 | 30.86 | 70.92  | 274.57 | 577.72 | 412.57  |
| Republic of Ghana             | 0.56 | 4.95 | 6.04  | 44.75 | 23.05 | 134.27 | 342.18 | 612.84 | 67.82   |

|                           |      |      |       |       |       |        |        |        |        |
|---------------------------|------|------|-------|-------|-------|--------|--------|--------|--------|
| Republic of Guatemala     | 0.54 | 4.95 | 28.92 | 44.79 | 25.35 | 137.64 | 195.30 | 615.86 | 710.99 |
| Republic of Guinea        | 0.34 | 6.98 | 2.54  | 44.77 | 9.92  | 165.74 | 310.59 | 655.84 | 203.06 |
| Republic of Guinea-Bissau | 0.35 | 6.99 | 2.71  | 44.80 | 11.30 | 165.74 | 309.72 | 651.21 | 153.91 |
| Republic of Guyana        | 0.65 | 4.95 | 12.78 | 44.74 | 31.00 | 135.96 | 195.40 | 589.66 | 234.14 |
| Republic of Haiti         | 0.45 | 6.98 | 12.79 | 44.75 | 17.11 | 136.90 | 193.56 | 646.78 | 175.14 |
| Republic of Honduras      | 0.51 | 4.96 | 59.87 | 44.79 | 26.99 | 135.66 | 199.10 | 623.81 | 585.69 |
| Republic of Iceland       | 0.88 | 4.95 | 38.92 | 44.83 | 42.79 | 70.93  | 317.63 | 577.54 | 648.92 |
| Republic of India         | 0.58 | 4.95 | 21.65 | 44.78 | 37.58 | 134.38 | 62.57  | 612.74 | 310.59 |
| Republic of Indonesia     | 0.66 | 4.95 | 0.58  | 44.76 | 17.32 | 136.43 | 171.01 | 583.75 | 297.83 |
| Republic of Iraq          | 0.66 | 4.95 | 22.53 | 44.72 | 21.99 | 134.95 | 438.82 | 582.14 | 584.69 |
| Republic of Italy         | 0.81 | 4.95 | 26.79 | 44.78 | 26.49 | 70.93  | 360.49 | 577.60 | 625.07 |
| Republic of Kazakhstan    | 0.73 | 4.94 | 15.52 | 44.79 | 32.51 | 135.29 | 172.26 | 577.73 | 586.21 |
| Republic of Kenya         | 0.52 | 4.96 | 5.19  | 44.76 | 17.25 | 135.14 | 174.67 | 620.11 | 392.91 |
| Republic of Kiribati      | 0.53 | 4.95 | 3.90  | 44.74 | 40.10 | 135.71 | 145.89 | 618.69 | 198.52 |
| Republic of Korea         | 0.89 | 4.95 | 28.77 | 44.73 | 58.37 | 70.92  | 194.11 | 577.39 | 779.69 |
| Republic of Latvia        | 0.83 | 4.95 | 41.95 | 44.76 | 43.61 | 70.92  | 236.39 | 577.41 | 686.09 |
| Republic of Liberia       | 0.35 | 6.98 | 4.55  | 44.85 | 16.71 | 165.72 | 301.91 | 651.38 | 149.19 |
| Republic of Lithuania     | 0.86 | 4.95 | 53.02 | 44.82 | 42.18 | 70.91  | 236.54 | 577.20 | 668.05 |
| Republic of Madagascar    | 0.40 | 6.98 | 2.32  | 44.74 | 4.39  | 165.75 | 104.47 | 648.76 | 240.60 |
| Republic of Malawi        | 0.38 | 6.98 | 3.74  | 44.80 | 8.98  | 165.78 | 102.17 | 649.94 | 224.61 |
| Republic of Maldives      | 0.65 | 4.95 | 11.84 | 44.73 | 29.87 | 134.52 | 127.33 | 587.11 | 111.10 |
| Republic of Mali          | 0.27 | 7.01 | 2.36  | 44.72 | 11.34 | 165.78 | 309.90 | 728.46 | 37.67  |
| Republic of Malta         | 0.80 | 4.95 | 32.03 | 44.76 | 31.41 | 71.05  | 316.84 | 577.17 | 693.25 |
| Republic of Mauritius     | 0.72 | 4.95 | 8.18  | 44.74 | 31.86 | 135.45 | 126.78 | 577.24 | 182.95 |
| Republic of Moldova       | 0.73 | 4.95 | 19.22 | 44.75 | 32.08 | 135.51 | 172.01 | 577.24 | 700.22 |
| Republic of Mozambique    | 0.33 | 6.98 | 2.66  | 44.75 | 6.96  | 165.74 | 97.54  | 662.51 | 257.71 |
| Republic of Namibia       | 0.62 | 4.95 | 17.02 | 44.77 | 15.52 | 135.44 | 241.95 | 602.52 | 132.20 |
| Republic of Nauru         | 0.63 | 4.95 | 9.60  | 44.81 | 45.34 | 135.17 | 147.55 | 596.83 | 226.23 |
| Republic of Nicaragua     | 0.52 | 4.96 | 33.88 | 44.69 | 27.93 | 135.76 | 199.75 | 620.34 | 595.99 |

|                                  |      |      |        |       |       |        |        |        |         |
|----------------------------------|------|------|--------|-------|-------|--------|--------|--------|---------|
| Republic of Niue                 | 0.73 | 4.95 | 9.46   | 44.78 | 49.74 | 135.57 | 147.30 | 577.46 | 213.02  |
| Republic of Palau                | 0.75 | 4.95 | 11.13  | 44.72 | 49.91 | 117.24 | 165.72 | 577.55 | 213.69  |
| Republic of Panama               | 0.71 | 4.95 | 29.71  | 44.73 | 32.45 | 135.50 | 200.22 | 577.40 | 609.43  |
| Republic of Paraguay             | 0.64 | 4.95 | 56.11  | 44.78 | 31.61 | 134.78 | 198.81 | 591.79 | 529.73  |
| Republic of Peru                 | 0.66 | 4.95 | 106.59 | 44.76 | 41.00 | 135.26 | 200.54 | 582.71 | 165.61  |
| Republic of Poland               | 0.81 | 4.95 | 36.41  | 44.74 | 25.07 | 70.91  | 287.93 | 577.63 | 1069.02 |
| Republic of Rwanda               | 0.44 | 6.98 | 4.23   | 44.82 | 6.16  | 136.08 | 132.63 | 647.41 | 305.69  |
| Republic of San Marino           | 0.89 | 4.95 | 24.94  | 44.78 | 31.63 | 70.90  | 316.73 | 577.89 | 582.16  |
| Republic of Senegal              | 0.41 | 6.98 | 3.63   | 44.75 | 16.11 | 156.34 | 319.61 | 648.16 | 101.24  |
| Republic of Serbia               | 0.79 | 4.94 | 20.48  | 44.74 | 24.42 | 106.76 | 201.86 | 577.17 | 1103.78 |
| Republic of Seychelles           | 0.73 | 4.95 | 5.41   | 44.72 | 33.86 | 136.13 | 127.10 | 577.30 | 139.81  |
| Republic of Sierra Leone         | 0.36 | 6.98 | 2.80   | 44.77 | 13.33 | 165.72 | 310.94 | 651.22 | 169.15  |
| Republic of Singapore            | 0.86 | 4.95 | 21.50  | 44.71 | 57.37 | 70.91  | 195.38 | 577.39 | 546.11  |
| Republic of Slovenia             | 0.84 | 4.95 | 32.86  | 44.86 | 30.29 | 70.93  | 237.26 | 577.63 | 931.65  |
| Republic of South Africa         | 0.68 | 4.95 | 42.03  | 44.80 | 20.08 | 135.70 | 290.71 | 577.33 | 124.30  |
| Republic of South Sudan          | 0.54 | 4.95 | 5.28   | 44.72 | 5.60  | 134.90 | 133.18 | 615.32 | 254.16  |
| Republic of Sudan                | 0.28 | 6.99 | 13.20  | 44.76 | 16.45 | 165.81 | 409.57 | 728.41 | 468.04  |
| Republic of Suriname             | 0.63 | 4.95 | 11.66  | 44.74 | 35.81 | 135.55 | 197.40 | 591.61 | 250.03  |
| Republic of Tajikistan           | 0.54 | 4.94 | 24.14  | 44.80 | 14.74 | 136.25 | 171.37 | 616.08 | 431.74  |
| Republic of the Congo            | 0.58 | 4.95 | 14.83  | 44.76 | 23.84 | 134.90 | 240.99 | 612.74 | 232.58  |
| Republic of the Gambia           | 0.41 | 6.98 | 3.57   | 44.77 | 19.27 | 155.99 | 317.02 | 648.19 | 128.06  |
| Republic of the Marshall Islands | 0.57 | 4.94 | 7.42   | 44.77 | 41.55 | 135.02 | 146.88 | 612.88 | 144.07  |
| Republic of the Niger            | 0.17 | 7.08 | 1.64   | 47.90 | 3.92  | 266.66 | 210.22 | 728.21 | 126.90  |
| Republic of the Philippines      | 0.65 | 4.95 | 8.13   | 44.70 | 14.13 | 135.65 | 169.85 | 587.88 | 263.11  |
| Republic of the Union of Myanmar | 0.53 | 4.95 | 5.39   | 44.73 | 19.70 | 134.58 | 128.33 | 617.05 | 34.90   |
| Republic of Trinidad and Tobago  | 0.77 | 4.94 | 35.20  | 44.79 | 36.75 | 108.89 | 224.98 | 577.56 | 270.57  |
| Republic of Tunisia              | 0.68 | 4.95 | 20.36  | 44.73 | 24.44 | 135.22 | 440.20 | 577.33 | 677.81  |
| Republic of Turkey               | 0.71 | 4.94 | 39.31  | 44.72 | 26.65 | 135.08 | 442.80 | 577.97 | 590.28  |
| Republic of Uganda               | 0.42 | 6.99 | 3.07   | 44.75 | 7.79  | 145.50 | 123.43 | 648.00 | 256.87  |

|                                  |      |      |       |       |       |        |        |        |         |
|----------------------------------|------|------|-------|-------|-------|--------|--------|--------|---------|
| Republic of Uzbekistan           | 0.66 | 4.95 | 58.38 | 44.72 | 25.08 | 135.15 | 171.95 | 582.63 | 528.83  |
| Republic of Vanuatu              | 0.47 | 5.56 | 5.47  | 44.84 | 29.41 | 136.18 | 146.71 | 641.25 | 235.26  |
| Republic of Yemen                | 0.45 | 6.99 | 8.25  | 44.76 | 10.95 | 135.93 | 432.97 | 646.85 | 524.18  |
| Republic of Zambia               | 0.51 | 4.96 | 6.24  | 44.81 | 11.70 | 135.54 | 132.27 | 625.80 | 182.31  |
| Republic of Zimbabwe             | 0.47 | 5.43 | 10.19 | 44.75 | 7.45  | 136.23 | 240.12 | 641.13 | 147.70  |
| Romania                          | 0.77 | 4.95 | 17.80 | 44.74 | 22.22 | 108.91 | 199.67 | 577.71 | 1109.83 |
| Russian Federation               | 0.81 | 4.95 | 35.86 | 44.77 | 35.19 | 70.93  | 285.16 | 577.53 | 747.47  |
| Saint Kitts and Nevis            | 0.75 | 4.95 | 27.30 | 44.76 | 37.77 | 118.25 | 217.06 | 577.52 | 250.27  |
| Saint Lucia                      | 0.67 | 4.95 | 23.74 | 44.87 | 33.30 | 135.66 | 198.92 | 577.13 | 276.65  |
| Saint Vincent and the Grenadines | 0.64 | 4.95 | 14.90 | 44.75 | 31.97 | 135.21 | 199.23 | 590.79 | 242.31  |
| Slovak Republic                  | 0.81 | 4.95 | 19.50 | 44.76 | 31.31 | 70.90  | 237.36 | 577.24 | 1126.30 |
| Socialist Republic of Viet Nam   | 0.63 | 4.95 | 11.37 | 44.86 | 16.36 | 135.88 | 129.02 | 599.34 | 191.58  |
| Solomon Islands                  | 0.43 | 6.98 | 5.85  | 44.75 | 34.85 | 136.98 | 145.53 | 647.91 | 192.60  |
| State of Eritrea                 | 0.40 | 6.99 | 1.96  | 44.73 | 7.37  | 162.02 | 108.17 | 648.89 | 146.30  |
| State of Israel                  | 0.81 | 4.95 | 30.17 | 44.72 | 31.04 | 70.92  | 319.05 | 577.53 | 655.42  |
| State of Kuwait                  | 0.85 | 4.95 | 74.09 | 44.78 | 33.07 | 70.92  | 506.67 | 578.11 | 630.92  |
| State of Libya                   | 0.73 | 4.95 | 20.95 | 44.71 | 27.02 | 135.85 | 438.92 | 577.22 | 599.32  |
| State of Qatar                   | 0.85 | 4.95 | 39.28 | 44.75 | 34.45 | 70.90  | 505.49 | 577.96 | 634.91  |
| Sultanate of Oman                | 0.77 | 4.95 | 22.50 | 44.78 | 29.76 | 108.90 | 468.87 | 577.42 | 578.69  |
| Swiss Confederation              | 0.93 | 4.94 | 33.78 | 44.73 | 28.84 | 70.91  | 316.51 | 577.70 | 682.11  |
| Syrian Arab Republic             | 0.62 | 4.95 | 20.92 | 44.79 | 22.37 | 136.49 | 438.09 | 597.70 | 592.99  |
| Taiwan (Province of China)       | 0.87 | 4.94 | 13.48 | 44.77 | 63.98 | 70.91  | 217.08 | 577.51 | 293.44  |
| Togolese Republic                | 0.41 | 6.98 | 3.14  | 44.75 | 14.84 | 154.98 | 321.42 | 648.13 | 169.57  |
| Tokelau                          | 0.69 | 4.95 | 8.55  | 44.75 | 45.36 | 135.26 | 147.99 | 577.52 | 220.08  |
| Turkmenistan                     | 0.68 | 4.95 | 13.19 | 44.84 | 26.22 | 136.63 | 171.24 | 577.65 | 505.51  |
| Tuvalu                           | 0.58 | 4.94 | 7.48  | 44.84 | 42.97 | 136.21 | 147.32 | 613.00 | 193.57  |
| Ukraine                          | 0.76 | 4.95 | 12.66 | 44.74 | 28.98 | 110.10 | 245.82 | 577.33 | 987.86  |
| Union of the Comoros             | 0.48 | 4.97 | 6.31  | 44.74 | 12.52 | 136.67 | 134.02 | 640.93 | 223.51  |
| United Arab Emirates             | 0.85 | 4.95 | 35.02 | 44.69 | 31.36 | 70.93  | 505.01 | 577.55 | 556.12  |

|                                                      |      |      |       |       |       |        |        |        |        |
|------------------------------------------------------|------|------|-------|-------|-------|--------|--------|--------|--------|
| United Kingdom of Great Britain and Northern Ireland | 0.86 | 4.94 | 53.59 | 44.75 | 31.71 | 70.92  | 394.82 | 577.47 | 632.99 |
| United Mexican States                                | 0.66 | 4.95 | 74.10 | 44.79 | 30.22 | 136.01 | 250.94 | 580.17 | 608.44 |
| United Republic of Tanzania                          | 0.45 | 6.98 | 3.98  | 44.81 | 11.29 | 135.63 | 132.96 | 646.80 | 236.25 |
| United States of America                             | 0.86 | 4.95 | 35.06 | 44.74 | 49.68 | 70.91  | 270.46 | 579.01 | 827.79 |
| United States Virgin Islands                         | 0.82 | 4.95 | 20.12 | 44.77 | 41.34 | 70.91  | 264.76 | 577.45 | 264.86 |

eff\_diff, effective difference; SDI, socio-demographic index.

**Table S7. Total healthcare expenditure for women of reproductive age in all age groups due to rheumatoid arthritis globally and across regions in 2021**

| Location                                                | Total healthcare expenditure (95% uncertainty interval, 2020 US\$) |                                              |                                              |                                              |                                              |                                              |                                              |                                              |
|---------------------------------------------------------|--------------------------------------------------------------------|----------------------------------------------|----------------------------------------------|----------------------------------------------|----------------------------------------------|----------------------------------------------|----------------------------------------------|----------------------------------------------|
|                                                         | All ages (15-49 years)                                             | 15-19 years                                  | 20-24 years                                  | 25-29 years                                  | 30-34 years                                  | 35-39 years                                  | 40-44 years                                  | 45-49 years                                  |
| <b>Global</b>                                           | 8255409986<br>(6423931743,1031<br>2425697)                         | 124911057.2<br>(93464908.77,16<br>3282902.2) | 365525585.7<br>(264673921.4,4891<br>11768.3) | 634005852.4<br>(474544198.2,8147<br>50686.5) | 1125816392<br>(859246234,146242<br>5332)     | 1530852139<br>(1200468808,19302<br>57869)    | 1711513060<br>(1337784188,20961<br>80642)    | 2762785901<br>(2193749486,33564<br>16498)    |
| <b>SDI quantile</b>                                     |                                                                    |                                              |                                              |                                              |                                              |                                              |                                              |                                              |
| <b>High SDI</b>                                         | 3086175874<br>(2517242319,3697<br>846635)                          | 68875896.25<br>(56708905.68,82<br>983622.14) | 158420631.6<br>(128174237,194285<br>531.9)   | 239719240.7<br>(195338807.9,2885<br>44058.4) | 367992994.1<br>(299340025.1,4487<br>48601)   | 545463425.8<br>(450977739.8,6544<br>90151.8) | 676875351.4<br>(541994059.6,8107<br>61598.7) | 1028828334<br>(844708544.3,1218<br>033072)   |
| <b>High-middle SDI</b>                                  | 4102998289<br>(3112661033,5218<br>052138)                          | 36772447<br>(24088144.75,52<br>983672.82)    | 135068549<br>(89420843.35,1921<br>01064.6)   | 277609688.3<br>(195997384.2,3695<br>25368.3) | 596348333.5<br>(440749019,796053<br>065.1)   | 774183972.6<br>(588591147.1,9970<br>26461.9) | 819980391.2<br>(632972911.1,1012<br>416946)  | 1463034907<br>(1140841584,17979<br>45559)    |
| <b>Low SDI</b>                                          | 1984044.67<br>(1433826.56,26438<br>84.13)                          | 61895.6<br>(39103.84,88669<br>.43)           | 186872.79<br>(119471.68,272853.<br>56)       | 266162.35<br>(183727.65,363859.<br>3)        | 323957.04<br>(232973.95,441709.<br>69)       | 377890.22<br>(280357.22,501384.<br>18)       | 357966.27<br>(266367.55,458479.<br>95)       | 409300.4<br>(311824.66,516928.<br>02)        |
| <b>Low-middle SDI</b>                                   | 763165441.1<br>(560347061.1,1016<br>130567)                        | 14777228.05<br>(9671235.45,210<br>84124.91)  | 54219609.5<br>(34815990.44,7772<br>3915.71)  | 86155114.62<br>(60957616.8,11687<br>0749.6)  | 116884734.4<br>(86036809.98,1601<br>20955.5) | 149759261.6<br>(112945809.2,2016<br>70364.4) | 150287230.8<br>(112033792.3,1946<br>44899.9) | 191082262.1<br>(143885806.9,2440<br>15556.8) |
| <b>Middle SDI</b>                                       | 301086338<br>(232247503.4,3777<br>52472.1)                         | 4423590.35<br>(2957519.04,614<br>2812.92)    | 17629922.84<br>(12143378.87,2472<br>8402.58) | 30255646.44<br>(22066661.69,3944<br>6650.97) | 44266372.55<br>(32887406.05,5706<br>1000.45) | 61067588.57<br>(47673754.57,7656<br>9506.27) | 64012120.22<br>(50517057.05,7789<br>8716.93) | 79431097.07<br>(64001726.16,9590<br>5382.01) |
| <b>Central Europe, Eastern Europe, and Central Asia</b> | 94456899.71<br>(73991173.99,1176<br>16563.2)                       | 609044.08<br>(380871.67,9204<br>05.06)       | 2206351.5<br>(1425843.64,32867<br>65.73)     | 4921223.51<br>(3407587.87,65896<br>09.11)    | 11897790.13<br>(8506123.4,158038<br>63.05)   | 20196007<br>(15637388.29,2550<br>6705.31)    | 23250556.39<br>(18749331.92,2836<br>6785.19) | 31375927.11<br>(25884027.2,37142<br>429.74)  |
| <b>Central Asia</b>                                     | 2109035.02<br>(1624756.77,26527)                                   | 22384.24<br>(13969.52,33390)                 | 89066.03<br>(57523.17,131728.4)              | 202842.98<br>(137112.91,271487.              | 353597.68<br>(246359.32,466728.              | 454491.23<br>(351179.32,569615.              | 445966.97<br>(365207.74,534684.              | 540685.89<br>(453404.79,645118.              |

|                                    |                                              |                                              |                                              |                                              |                                              |                                              |                                              |                                              |
|------------------------------------|----------------------------------------------|----------------------------------------------|----------------------------------------------|----------------------------------------------|----------------------------------------------|----------------------------------------------|----------------------------------------------|----------------------------------------------|
|                                    | 54.66)                                       | .75)                                         | 8)                                           | 75)                                          | 62)                                          | 79)                                          | 29)                                          | 98)                                          |
| <b>Central Europe</b>              | 11097696.4<br>(8228773.69,14362<br>150.4)    | 82206.87<br>(52129.84,11758<br>2.28)         | 313003.48<br>(200178.68,457906.<br>92)       | 643808.63<br>(442555.76,878063.<br>36)       | 1186522.91<br>(845018.88,162401<br>9.85)     | 2076464.35<br>(1512521.03,27347<br>63.26)    | 2715260.7<br>(1983265.26,34941<br>12.46)     | 4080429.45<br>(3193104.24,50557<br>02.26)    |
| <b>Eastern Europe</b>              | 81250168.29<br>(64137643.54,1006<br>01658.1) | 504452.97<br>(314772.3,76943<br>2.03)        | 1804281.98<br>(1168141.79,26971<br>30.33)    | 4074571.9<br>(2827919.2,544005<br>8.01)      | 10357669.55<br>(7414745.21,13713<br>114.58)  | 17665051.41<br>(13773687.95,2220<br>2326.26) | 20089328.71<br>(16400858.92,2433<br>7988.44) | 26754811.77<br>(22237518.17,3144<br>1608.5)  |
| <b>High income</b>                 | 3123128250<br>(2546145426,3744<br>697473)    | 69273463.21<br>(56972289,8354<br>6971.14)    | 159663889.8<br>(128997343.3,1960<br>35190.6) | 241801302.2<br>(196835066.6,2913<br>62579.6) | 371300861.3<br>(301809131.3,4531<br>61606.1) | 550905479.5<br>(455326649.5,6615<br>41985.9) | 685517861.5<br>(548819788,821547<br>825.2)   | 1044665393<br>(857385158.5,1237<br>501315)   |
| <b>Australasia</b>                 | 8710841<br>(6224098.97,11570<br>161.99)      | 107418.34<br>(68593.49,15126<br>2.6)         | 382633.33<br>(246526.57,559079.<br>89)       | 722657.84<br>(499419.63,100660<br>7.32)      | 1153367.2<br>(821551.52,160356<br>2.2)       | 1662765.93<br>(1197124.16,22216<br>63.23)    | 1833481.04<br>(1287790.6,237801<br>6.03)     | 2848517.32<br>(2103093,3649970.<br>72)       |
| <b>High-income Asia Pacific</b>    | 188107656.2<br>(137229877.8,2465<br>71480.9) | 1501784.64<br>(957509.08,2149<br>728.52)     | 5906961.25<br>(3790340.31,85134<br>49.79)    | 10628092.78<br>(7407945.31,14643<br>610.85)  | 17152450.54<br>(12499739.99,2391<br>3130.02) | 29632132.51<br>(21820143.45,3998<br>4148.08) | 42505119.32<br>(30387365.78,5551<br>3850.74) | 80781115.17<br>(60366833.93,1018<br>53562.9) |
| <b>High-income North America</b>   | 2656120782<br>(2200602487,3135<br>812926)    | 64173599.11<br>(53617979.65,76<br>447909.71) | 141111565.9<br>(116770955.6,1697<br>89010.8) | 209117237.2<br>(173930276.7,2470<br>14552.1) | 318850750.3<br>(263498501.9,3819<br>09526)   | 470891393.5<br>(395337905.5,5550<br>63570.4) | 582192957.9<br>(472861614.2,6882<br>97466.2) | 869783278.4<br>(724585253.2,1017<br>290891)  |
| <b>Southern Latin America</b>      | 13552795.35<br>(10031248.34,1752<br>7771.67) | 195526.27<br>(125370.2,28334<br>6.81)        | 676823.52<br>(424866.28,100042<br>3.27)      | 1177542.95<br>(793377.83,164104<br>0.95)     | 1775664<br>(1214044.15,24141<br>43.55)       | 2535901.9<br>(1899591.41,33159<br>19.81)     | 3023442.52<br>(2269360.99,38028<br>64.45)    | 4167894.18<br>(3304637.46,50700<br>32.84)    |
| <b>Western Europe</b>              | 256636175.1<br>(192057714.2,3332<br>15132.6) | 3295134.86<br>(2202836.58,451<br>4723.51)    | 11585905.79<br>(7764654.59,16173<br>226.79)  | 20155771.43<br>(14204047.04,2705<br>6768.44) | 32368629.21<br>(23775293.76,4332<br>1244.33) | 46183285.66<br>(35071884.99,6095<br>6684.44) | 55962860.73<br>(42013656.37,7155<br>5627.76) | 87084587.45<br>(67025340.84,1096<br>36857.3) |
| <b>Latin America and Caribbean</b> | 256724176.4<br>(199339283.5,3200<br>81615.5) | 3732325.16<br>(2529386.88,514<br>1132.26)    | 15217458.79<br>(10590830.5,21197<br>996.81)  | 25795145.32<br>(18945299.4,33474<br>347.27)  | 37122909.77<br>(27681746.23,4764<br>3598.24) | 51573962.62<br>(40515168.9,64303<br>867.25)  | 54878058.14<br>(43564274.26,6631<br>9088.48) | 68404316.63<br>(55512577.37,8200<br>1585.25) |
| <b>Andean Latin</b>                | 6105186.65                                   | 104756.38                                    | 440595.78                                    | 749147.3                                     | 985206.62                                    | 1206332.36                                   | 1201283.67                                   | 1417864.54                                   |

|                                                       |                                              |                                              |                                              |                                              |                                              |                                              |                                              |                                              |
|-------------------------------------------------------|----------------------------------------------|----------------------------------------------|----------------------------------------------|----------------------------------------------|----------------------------------------------|----------------------------------------------|----------------------------------------------|----------------------------------------------|
| <b>America</b>                                        | (4783559.9,765044<br>8.38)                   | (74442.74,14456<br>7.03)                     | (312633.43,606595.<br>76)                    | (561681.01,956412.<br>03)                    | (752257.33,126050<br>6.1)                    | (952715.24,151711<br>6.52)                   | (966974.63,147083<br>5.56)                   | (1162855.51,16944<br>15.37)                  |
| <b>Caribbean</b>                                      | 966841.54<br>(715693.45,126598<br>7.2)       | 10622.55<br>(6743.16,15530.<br>36)           | 42934.47<br>(27562.32,63693.72<br>)          | 76107.97<br>(52510.43,103767.2<br>4)         | 131354.58<br>(92444.13,180460.2<br>)         | 170712.93<br>(128393.5,227668.3<br>2)        | 183508.74<br>(136322.86,235880.<br>46)       | 351600.29<br>(271717.06,438986.<br>9)        |
| <b>Central Latin<br/>America</b>                      | 97896192.79<br>(76295223.94,1217<br>95532.8) | 768443.08<br>(483474.78,1151<br>492.45)      | 3232503.43<br>(2136714.65,46840<br>15.93)    | 6869983.44<br>(4886270.93,91147<br>36.15)    | 11940231.58<br>(8729502.88,15892<br>994.24)  | 19099636.82<br>(15040338.96,2393<br>6019.38) | 23295636.72<br>(18539161.7,28208<br>025.32)  | 32689757.73<br>(26479760.05,3880<br>8249.37) |
| <b>Tropical Latin<br/>America</b>                     | 151755955.5<br>(117544806.2,1893<br>69647.1) | 2848503.15<br>(1964726.2,3829<br>542.42)     | 11501425.11<br>(8113920.1,158436<br>91.4)    | 18099906.6<br>(13444837.02,2329<br>9431.84)  | 24066116.98<br>(18107541.89,3030<br>9637.7)  | 31097280.52<br>(24393721.2,38623<br>063.03)  | 30197629.01<br>(23921815.06,3640<br>4347.14) | 33945094.08<br>(27598244.76,4105<br>9933.6)  |
| <b>North Africa<br/>and Middle<br/>East</b>           | 53813487.97<br>(41213609.76,6853<br>6362.56) | 948459.41<br>(642772.22,1306<br>249.37)      | 3463190.8<br>(2378274.47,48428<br>65.24)     | 5720229.24<br>(4121779.66,75149<br>40.48)    | 8419330.46<br>(6259154.7,109473<br>29.53)    | 11331977.75<br>(8795895.55,14374<br>168.9)   | 11226963.67<br>(8805506.47,14014<br>342.9)   | 12703336.63<br>(10210226.7,15536<br>466.13)  |
| <b>South Asia</b>                                     | 746831294.6<br>(548219464.5,9949<br>38734.7) | 14315869.18<br>(9375455.06,204<br>33798.6)   | 52764156<br>(33867229.02,7566<br>6427.3)     | 84022945.61<br>(59474498.64,1140<br>19767.9) | 114193274<br>(84088117.27,1565<br>84379.4)   | 146517395.1<br>(110472215.5,1974<br>70527.5) | 147282865.8<br>(109706571.4,1908<br>80653.8) | 187734788.9<br>(141235377.7,2398<br>83180.1) |
| <b>Southeast Asia,<br/>East Asia, and<br/>Oceania</b> | 3963672117<br>(3002173899,5045<br>230021)    | 35703400.02<br>(23359875.87,51<br>457996.62) | 131137893.6<br>(86721327.01,1865<br>42169.7) | 269798455.5<br>(190353141.5,3592<br>58167)   | 579909756.1<br>(428650764.8,7744<br>69020.2) | 746680139.9<br>(566883431.1,9624<br>68792.4) | 786169874.5<br>(605607106.7,9711<br>18617.7) | 1414272597<br>(1100598252,17399<br>15258)    |
| <b>East Asia</b>                                      | 3942719998<br>(2987488957,5016<br>786547)    | 35338729.07<br>(23146838.38,50<br>916705.15) | 129918227.2<br>(85976065.35,1846<br>95578.6) | 267752048.5<br>(189016165.9,3563<br>84277.6) | 576989624.2<br>(426656791.8,7703<br>92191.3) | 742750195.4<br>(564066714.4,9571<br>18748.3) | 781746872.4<br>(602442597.9,9652<br>83410.8) | 1408224301<br>(1096183783,17319<br>95635)    |
| <b>Oceania</b>                                        | 4765.34<br>(3419.14,6330.66)                 | 134.99<br>(84.97,194.35)                     | 426.61<br>(274.57,627.3)                     | 637.08<br>(429.88,881.9)                     | 795.28<br>(557.52,1069.67)                   | 917.31<br>(670.54,1218.36)                   | 870.87<br>(648.2,1100.77)                    | 983.2<br>(753.46,1238.32)                    |
| <b>Southeast Asia</b>                                 | 20947353.65<br>(14681522.83,2843<br>7143.79) | 364535.96<br>(212952.53,5410<br>97.12)       | 1219239.71<br>(744987.09,184596<br>3.78)     | 2045769.95<br>(1336545.73,28730<br>07.57)    | 2919336.68<br>(1993415.5,407575<br>9.24)     | 3929027.13<br>(2816046.07,53488<br>25.73)    | 4422131.22<br>(3163860.67,58341<br>06.18)    | 6047312.99<br>(4413715.23,79183<br>84.17)    |
| <b>Sub-Saharan</b>                                    | 16783760.83                                  | 328496.19                                    | 1072645.22                                   | 1946551.02                                   | 2972469.73                                   | 3647176.99                                   | 3186879.95                                   | 3629541.74                                   |

|                                            |                                             |                                       |                                        |                                         |                                           |                                         |                                          |                                          |
|--------------------------------------------|---------------------------------------------|---------------------------------------|----------------------------------------|-----------------------------------------|-------------------------------------------|-----------------------------------------|------------------------------------------|------------------------------------------|
| <b>Africa</b>                              | (12848886.48,2132<br>4926.11)               | (204258.07,4763<br>49.17)             | (693073.42,154035<br>2.98)             | (1406824.58,25312<br>75.12)             | (2251196.29,38155<br>35.24)               | (2838059.08,45918<br>21.27)             | (2531608.87,39333<br>28.32)              | (2923866.17,44362<br>64.01)              |
| <b>Central<br/>Sub-Saharan<br/>Africa</b>  | 313899.64<br>(223479.32,420402<br>.41)      | 8148.24<br>(4880.71,12182.<br>67)     | 23275.14<br>(14290.18,35566.63<br>)    | 35123.14<br>(23178.16,48925.13<br>)     | 47544.85<br>(33166.65,65561.97<br>)       | 60126.58<br>(43510.98,79520.71<br>)     | 62483.73<br>(45582.64,81305.81<br>)      | 77197.95<br>(58869.98,97339.5)           |
| <b>Eastern<br/>Sub-Saharan<br/>Africa</b>  | 1072501.66<br>(746575.41,147436<br>7.74)    | 31733.93<br>(18673.26,47568<br>.89)   | 93779.52<br>(56568.44,142434.9<br>5)   | 134287.53<br>(88428.85,188440.7<br>)    | 169016.62<br>(117677.07,240072.<br>25)    | 206289.65<br>(147945.79,283840.<br>24)  | 202288.02<br>(144156.82,266960.<br>77)   | 235106.38<br>(173125.18,305049.<br>94)   |
| <b>Southern<br/>Sub-Saharan<br/>Africa</b> | 10799054.39<br>(8582670.67,13320<br>091.15) | 121323.15<br>(77067.1,179099<br>.21)  | 486714.18<br>(326548.35,692465.<br>59) | 1137859.86<br>(861243.44,142115<br>3.8) | 2007900.79<br>(1568598.47,24981<br>23.04) | 2531356<br>(2016600.46,31068<br>94.96)  | 2129950.81<br>(1748066.04,25730<br>31.4) | 2383949.61<br>(1984546.8,284932<br>3.15) |
| <b>Western<br/>Sub-Saharan<br/>Africa</b>  | 4598305.14<br>(3296161.08,61100<br>64.8)    | 167290.87<br>(103636.99,2374<br>98.4) | 468876.37<br>(295666.45,669885.<br>81) | 639280.49<br>(433974.12,872755.<br>5)   | 748007.47<br>(531754.1,1011777.<br>97)    | 849404.75<br>(630001.84,112156<br>5.37) | 792157.39<br>(593803.36,101203<br>0.34)  | 933287.79<br>(707324.21,118455<br>1.42)  |

**Table S8. Total healthcare expenditure for women of reproductive age in all age groups due to osteoarthritis globally and across regions in 2021**

| Location                                                | Total healthcare expenditure (95% uncertainty interval, 2020 US\$) |             |             |             |                                              |                                              |                                              |                                              |
|---------------------------------------------------------|--------------------------------------------------------------------|-------------|-------------|-------------|----------------------------------------------|----------------------------------------------|----------------------------------------------|----------------------------------------------|
|                                                         | All ages (15-49 years)                                             | 15-19 years | 20-24 years | 25-29 years | 30-34 years                                  | 35-39 years                                  | 40-44 years                                  | 45-49 years                                  |
| <b>Global</b>                                           | 5070132630<br>(4210925484,602424<br>2252)                          | 0 (0,0)     | 0 (0,0)     | 0 (0,0)     | 216762900.4<br>(172331909.6,268767<br>057.5) | 492321380.8<br>(387147677.9,615534<br>797.6) | 1138278712<br>(937068000.4,137754<br>1687)   | 3222769637<br>(2714377896,376239<br>8710)    |
| <b>SDI quantile</b>                                     |                                                                    |             |             |             |                                              |                                              |                                              |                                              |
| <b>High SDI</b>                                         | 1761788470<br>(1470200696,208440<br>3747)                          | 0 (0,0)     | 0 (0,0)     | 0 (0,0)     | 84824184.15<br>(69385189.65,103711<br>277.6) | 184729730<br>(149252955.6,225428<br>448.3)   | 432687097.5<br>(360809017.2,518308<br>144.7) | 1059547458<br>(890753534,1236955<br>876)     |
| <b>High-middle SDI</b>                                  | 2634042458<br>(2184272862,313612<br>0389)                          | 0 (0,0)     | 0 (0,0)     | 0 (0,0)     | 96730003.88<br>(75180180.37,121089<br>044.5) | 229100062.9<br>(176139938.5,292655<br>695.5) | 530730882.7<br>(432739780,6474008<br>49.8)   | 1777481509<br>(1500212964,207497<br>4799)    |
| <b>Low SDI</b>                                          | 1722169.27<br>(1410084.86,2082936<br>.77)                          | 0 (0,0)     | 0 (0,0)     | 0 (0,0)     | 106776.56<br>(81280.99,136829.28<br>)        | 214713.32<br>(168603.45,271681.5)<br>)       | 455575.39<br>(371631.73,558719.8<br>8)       | 945104.01<br>(788568.69,1115706.<br>12)      |
| <b>Low-middle SDI</b>                                   | 521676771.5<br>(430474550.5,620679<br>159.4)                       | 0 (0,0)     | 0 (0,0)     | 0 (0,0)     | 28810022.81<br>(22866977.68,358356<br>80.63) | 62909456.6<br>(49593666.23,778039<br>15.45)  | 136516537.4<br>(112103033.7,165099<br>601.5) | 293440754.6<br>(245910872.9,34193<br>9961.8) |
| <b>Middle SDI</b>                                       | 150902761.1<br>(124567289.9,180956<br>020.1)                       | 0 (0,0)     | 0 (0,0)     | 0 (0,0)     | 6291913.02<br>(4818280.94,7994225<br>.47)    | 15367417.97<br>(11992514.12,193750<br>56.82) | 37888618.61<br>(31044537.79,461743<br>71.33) | 91354811.53<br>(76711957.06,10741<br>2366.5) |
| <b>Central Europe, Eastern Europe, and Central Asia</b> | 47202334.21<br>(37773393.3,5842555<br>0.72)                        | 0 (0,0)     | 0 (0,0)     | 0 (0,0)     | 1696398.64<br>(1229722.25,2230113<br>.04)    | 4390500.4<br>(3379987.01,5604145<br>.62)     | 11372608.03<br>(9046570.61,1410262<br>6.65)  | 29742827.15<br>(24117113.43,36488<br>665.41) |
| <b>Central Asia</b>                                     | 841925.11<br>(663734.92,1050031.<br>21)                            | 0 (0,0)     | 0 (0,0)     | 0 (0,0)     | 39297.51<br>(28972.44,51422.83)              | 82198.96<br>(63741.94,104624.97)             | 197353.35<br>(156380.97,247370.5<br>6)       | 523075.28<br>(414639.56,646612.8<br>5)       |

|                                    |                                          |         |         |         |                                          |                                          |                                          |                                          |
|------------------------------------|------------------------------------------|---------|---------|---------|------------------------------------------|------------------------------------------|------------------------------------------|------------------------------------------|
| <b>Central Europe</b>              | 5433398.2<br>(4426668.7,6639672.34)      | 0 (0,0) | 0 (0,0) | 0 (0,0) | 187979.76<br>(138750.94,241666.26)       | 481254.01<br>(375884.6,613469.33)        | 1332156.78<br>(1080100.98,1649241.51)    | 3432007.64<br>(2831932.19,4135295.23)    |
| <b>Eastern Europe</b>              | 40927010.91<br>(32682989.68,50735847.17) | 0 (0,0) | 0 (0,0) | 0 (0,0) | 1469121.36<br>(1061998.87,1937023.95)    | 3827047.42<br>(2940360.47,4886051.32)    | 9843097.89<br>(7810088.66,12206014.58)   | 25787744.23<br>(20870541.68,31706757.32) |
| <b>High income</b>                 | 1783612414<br>(1488298965,2110494370)    | 0 (0,0) | 0 (0,0) | 0 (0,0) | 85457704<br>(69888814.75,104504084.9)    | 186222365.4<br>(150446655.7,227300805)   | 437493525.7<br>(364758445.5,524200496.2) | 1074438819<br>(903205048.8,1254488983)   |
| <b>Australasia</b>                 | 4314187.17<br>(3582800.02,5198166.78)    | 0 (0,0) | 0 (0,0) | 0 (0,0) | 193618.65<br>(152306.19,241234.95)       | 454627.83<br>(359789.3,568146.11)        | 1031713.89<br>(848015.06,1259646.16)     | 2634226.8<br>(2222689.48,3129139.55)     |
| <b>High-income Asia Pacific</b>    | 126019932.6<br>(104250656.2,151172913.5) | 0 (0,0) | 0 (0,0) | 0 (0,0) | 3015599.38<br>(2319508.72,3843035.4)     | 8583624.81<br>(6709692.99,10764067.59)   | 26449897.14<br>(21497622.78,32336916.48) | 87970811.27<br>(73723831.74,104228894.1) |
| <b>High-income North America</b>   | 1521088665<br>(1271461253,1796126981)    | 0 (0,0) | 0 (0,0) | 0 (0,0) | 76668703.15<br>(63078140.93,93407926.55) | 164585035.2<br>(133397583.5,200197524.8) | 378153347.6<br>(316147316.6,452001467.3) | 901681578.6<br>(758838212.3,1050520063)  |
| <b>Southern Latin America</b>      | 5756799.16<br>(4734811.32,6945951.17)    | 0 (0,0) | 0 (0,0) | 0 (0,0) | 263873.97<br>(204361.28,329036.13)       | 605593.14<br>(471083.23,758298.99)       | 1471482.71<br>(1200505.85,1812491.47)    | 3415849.34<br>(2858860.96,4046124.58)    |
| <b>Western Europe</b>              | 126432830.2<br>(104269443.9,151050356.9) | 0 (0,0) | 0 (0,0) | 0 (0,0) | 5315908.85<br>(4134497.63,6682851.88)    | 11993484.39<br>(9508506.65,15012767.55)  | 30387084.4<br>(25064985.25,36789974.84)  | 78736352.55<br>(65561454.33,92564762.66) |
| <b>Latin America and Caribbean</b> | 100590866.3<br>(83007304.1,120566571.5)  | 0 (0,0) | 0 (0,0) | 0 (0,0) | 4098498.56<br>(3152424.15,5197119.67)    | 10133492.82<br>(7915362.18,12770738.77)  | 25241692.99<br>(20656353.1,30668459.33)  | 61117181.96<br>(51283164.68,71930253.71) |
| <b>Andean Latin</b>                | 1251595.19<br>(1026490.84,1509031)       | 0 (0,0) | 0 (0,0) | 0 (0,0) | 58698.8<br>(44678.29,74755.7)            | 140015.94<br>(110508.04,177685.4)        | 324843.69<br>(265152.3,396491.99)        | 728036.75<br>(606152.21,860098.4)        |

|                                               |                                          |         |         |         |                                         |                                          |                                          |                                          |
|-----------------------------------------------|------------------------------------------|---------|---------|---------|-----------------------------------------|------------------------------------------|------------------------------------------|------------------------------------------|
| <b>America</b>                                | .52)                                     |         |         |         |                                         | 1)                                       | )                                        | 2)                                       |
| <b>Caribbean</b>                              | 542374.08<br>(445818.25,647422.34)       | 0 (0,0) | 0 (0,0) | 0 (0,0) | 21502.68<br>(16448.3,27466.64)          | 48490.76<br>(37737.74,61376.76)          | 112210.11<br>(91498.93,136749.77)        | 360170.53<br>(300133.28,421829.17)       |
| <b>Central Latin America</b>                  | 23022611.18<br>(18981827.53,27573625.12) | 0 (0,0) | 0 (0,0) | 0 (0,0) | 938371.1<br>(724073.46,1194428.6)       | 2224211.17<br>(1747434.32,2780066.79)    | 5564357.6<br>(4526113.15,6757208.98)     | 14295671.3<br>(11984206.6,16841920.75)   |
| <b>Tropical Latin America</b>                 | 75774285.9<br>(62553167.48,90836492.51)  | 0 (0,0) | 0 (0,0) | 0 (0,0) | 3079925.98<br>(2367224.1,3900468.73)    | 7720774.94<br>(6019682.07,9751609.81)    | 19240281.59<br>(15773588.72,23378008.58) | 45733303.38<br>(38392672.6,53806405.38)  |
| <b>North Africa and Middle East</b>           | 27645970<br>(22686764.66,33365205.83)    | 0 (0,0) | 0 (0,0) | 0 (0,0) | 1315897.03<br>(995435.56,1679341.24)    | 3235587.51<br>(2528032.29,4100362)       | 7343528.71<br>(5993029.75,8996066.48)    | 15750956.76<br>(13170267.06,18589436.1)  |
| <b>South Asia</b>                             | 510268630.6<br>(421103227.8,606948080.4) | 0 (0,0) | 0 (0,0) | 0 (0,0) | 28179518.18<br>(22384782.4,35032340.56) | 61579014.56<br>(48551035.23,76124261.51) | 133594203.6<br>(109712818,161538277.4)   | 286915894.3<br>(240454592.2,334253200.9) |
| <b>Southeast Asia, East Asia, and Oceania</b> | 2590903535<br>(2149915323,3082442879)    | 0 (0,0) | 0 (0,0) | 0 (0,0) | 95443089<br>(74248174.86,119391363.4)   | 225627355.1<br>(173435656.8,288199561.3) | 520771334.2<br>(424882876.7,635000940.1) | 1749061757<br>(1477348615,2039851014)    |
| <b>East Asia</b>                              | 2550975319<br>(2116858185,3034700585)    | 0 (0,0) | 0 (0,0) | 0 (0,0) | 93771745.12<br>(72970682.5,117267646)   | 221651071<br>(170345410.6,283190026.6)   | 510817075.8<br>(416700372.5,622827769.2) | 1724735427<br>(1456841719,2011415144)    |
| <b>Oceania</b>                                | 8638.1<br>(7080.35,10393.02)             | 0 (0,0) | 0 (0,0) | 0 (0,0) | 447.05<br>(344.79,557.26)               | 1027.13<br>(800.39,1310.19)              | 2278.38<br>(1852.18,2808.21)             | 4885.54<br>(4082.99,5717.36)             |
| <b>Southeast Asia</b>                         | 39919578.7<br>(33050058.23,47731900.14)  | 0 (0,0) | 0 (0,0) | 0 (0,0) | 1670896.83<br>(1277147.57,2123160.08)   | 3975256.95<br>(3089445.81,5008224.5)     | 9951979.95<br>(8180651.98,12170362.76)   | 24321444.96<br>(20502812.86,28430152.8)  |
| <b>Sub-Saharan</b>                            | 9908879.79                               | 0 (0,0) | 0 (0,0) | 0 (0,0) | 571795.02                               | 1133065.12                               | 2461818.48                               | 5742201.18                               |

|                                            |                                           |         |         |         |                                        |                                        |                                           |                                           |
|--------------------------------------------|-------------------------------------------|---------|---------|---------|----------------------------------------|----------------------------------------|-------------------------------------------|-------------------------------------------|
| <b>Africa</b>                              | (8140506.26,1199959<br>5.28)              |         |         |         | (432555.67,732694.7<br>5)              | (890948.77,1434923.<br>33)             | (2017906.73,3034821<br>)                  | (4799095.1,6797156.<br>2)                 |
| <b>Central<br/>Sub-Saharan<br/>Africa</b>  | 295479.79<br>(240902.61,359258.3<br>)     | 0 (0,0) | 0 (0,0) | 0 (0,0) | 17722.73<br>(13303.24,22849.67)        | 35604.3<br>(27719.28,45537.95)         | 76800.55<br>(62112.61,94706.03)           | 165352.22<br>(137767.48,196164.6<br>6)    |
| <b>Eastern<br/>Sub-Saharan<br/>Africa</b>  | 1223899.37<br>(1001066.1,1485202.<br>04)  | 0 (0,0) | 0 (0,0) | 0 (0,0) | 77212.9<br>(58116.94,99562.63)         | 150727.28<br>(118243.78,191053.5<br>9) | 322215.78<br>(263335.03,395968.5<br>2)    | 673743.41<br>(561370.35,798617.3<br>)     |
| <b>Southern<br/>Sub-Saharan<br/>Africa</b> | 3271207.8<br>(2670267,4013676.32<br>)     | 0 (0,0) | 0 (0,0) | 0 (0,0) | 174464.27<br>(128814.27,225779.9<br>9) | 372643.3<br>(292361.73,474386.7<br>8)  | 802448.12<br>(653663.11,1009746.<br>14)   | 1921652.1<br>(1595427.89,230376<br>3.4)   |
| <b>Western<br/>Sub-Saharan<br/>Africa</b>  | 5118292.84<br>(4228270.55,6141458<br>.62) | 0 (0,0) | 0 (0,0) | 0 (0,0) | 302395.12<br>(232321.22,384502.4<br>6) | 574090.24<br>(452623.98,723945)        | 1260354.03<br>(1038795.98,1534400<br>.31) | 2981453.45<br>(2504529.37,349861<br>0.84) |

**Table S9. Total healthcare expenditure for women of reproductive age in all age groups due to neck pain globally and across regions in 2021**

| Location                                                | Total healthcare expenditure (95% uncertainty interval, 2020 US\$) |                                              |                                              |                                              |                                              |                                              |                                              |                                              |
|---------------------------------------------------------|--------------------------------------------------------------------|----------------------------------------------|----------------------------------------------|----------------------------------------------|----------------------------------------------|----------------------------------------------|----------------------------------------------|----------------------------------------------|
|                                                         | All ages (15-49 years)                                             | 15-19 years                                  | 20-24 years                                  | 25-29 years                                  | 30-34 years                                  | 35-39 years                                  | 40-44 years                                  | 45-49 years                                  |
| <b>Global</b>                                           | 13640668506<br>(7940360396,2199<br>0342582)                        | 262062394.5<br>(143385070,441<br>979868.7)   | 418509551.6<br>(222081823.7,7401<br>15288)   | 837155295<br>(442072779.8,1397<br>877802)    | 1640230843<br>(984953625.4,2654<br>180026)   | 2452564110<br>(1409729844,40222<br>01201)    | 3225224539<br>(1887396238,50332<br>94613)    | 4804921774<br>(2850741016,77006<br>93783)    |
| <b>SDI quantile</b>                                     |                                                                    |                                              |                                              |                                              |                                              |                                              |                                              |                                              |
| <b>High SDI</b>                                         | 4853072555<br>(2824839286,7747<br>888831)                          | 144670130.9<br>(80043239.36,24<br>3489891.9) | 216379400.3<br>(116721912.2,3843<br>40634.2) | 382851699.8<br>(203764932.8,6266<br>73812.8) | 611490962.8<br>(372098928,99457<br>9049.7)   | 904524037.6<br>(522602920.7,1441<br>402626)  | 1169656675<br>(693693753.5,1832<br>693547)   | 1423499649<br>(835913599.9,2224<br>709269)   |
| <b>High-middle SDI</b>                                  | 6942474078<br>(4048346433,1126<br>6844097)                         | 68569321.6<br>(36797476.23,11<br>6055949.2)  | 125859389.5<br>(65375757.86,2216<br>80255.6) | 313605555.7<br>(164175010.3,5342<br>90347.8) | 798167405.6<br>(475379196.8,1285<br>956267)  | 1193566329<br>(682047321.4,2009<br>152017)   | 1599389047<br>(925904238.7,2495<br>031536)   | 2843317030<br>(1698667432,46046<br>77724)    |
| <b>Low SDI</b>                                          | 10866974.2<br>(6315536.02,17330<br>029.76)                         | 365279.71<br>(196766.79,6207<br>51.13)       | 501380.95<br>(262923.07,876985.<br>55)       | 887810.16<br>(472409.76,148998<br>2.04)      | 1438632.84<br>(865661.11,234425<br>6.94)     | 2145136.11<br>(1218455.5,346542<br>4.93)     | 2659668.48<br>(1575467.19,40856<br>29.12)    | 2869065.96<br>(1723852.6,444700<br>0.05)     |
| <b>Low-middle SDI</b>                                   | 1183649277<br>(684646230.4,1915<br>795135)                         | 33976155.14<br>(18516325.84,57<br>580183.13) | 49107612.66<br>(25583241.29,8604<br>3419.33) | 88038221.66<br>(46113011.15,1494<br>35558.3) | 145713921.7<br>(86443219.48,2355<br>22096.9) | 226711552.5<br>(131721396.7,3657<br>04824.4) | 293166409.9<br>(172339367.5,4542<br>49991.4) | 346935403.8<br>(203929668.5,5672<br>59061.1) |
| <b>Middle SDI</b>                                       | 650605620.9<br>(376212910.3,1042<br>484490)                        | 14481507.12<br>(7831261.72,242<br>33093.29)  | 26661768.26<br>(14137989.36,4717<br>3993.34) | 51772007.63<br>(27547415.79,8598<br>8100.8)  | 83419919.54<br>(50166620.05,1357<br>78355.9) | 125617055.1<br>(72139749.37,2024<br>76309)   | 160352737.8<br>(93883411.15,2472<br>33908.9) | 188300625.5<br>(110506462.9,2996<br>00729.1) |
| <b>Central Europe, Eastern Europe, and Central Asia</b> | 153656921.8<br>(88494475.12,2462<br>62771.5)                       | 2877625.02<br>(1599081,48025<br>51.33)       | 4275763.44<br>(2204869.21,75732<br>33.59)    | 8692729.24<br>(4637924.34,14877<br>522.27)   | 18821017.78<br>(11260653.49,3063<br>8890.57) | 30623014.39<br>(17693429.79,4925<br>7991.99) | 39448136.24<br>(22776064.67,6076<br>1608.65) | 48918635.68<br>(28322452.64,7835<br>0973.13) |
| <b>Central Asia</b>                                     | 2917932.32<br>(1674282.71,46559)                                   | 77093.28<br>(41295.99,13185)                 | 121475.38<br>(63006.83,218117.0)             | 254124.6<br>(131814.12,424278.               | 420990<br>(250754.06,688273)                 | 561319.67<br>(319542.77,898521.              | 673019.54<br>(401616.78,102697)              | 809909.85<br>(466252.15,126794)              |

|                                    |                                              |                                              |                                              |                                              |                                              |                                              |                                              |                                              |
|------------------------------------|----------------------------------------------|----------------------------------------------|----------------------------------------------|----------------------------------------------|----------------------------------------------|----------------------------------------------|----------------------------------------------|----------------------------------------------|
|                                    | 67.79)                                       | 8.83)                                        | 6)                                           | 79)                                          | .26)                                         | 02)                                          | 3.36)                                        | 5.48)                                        |
| <b>Central Europe</b>              | 18739676.84<br>(10788787.27,2994<br>4898.24) | 327947.12<br>(180560.58,5507<br>92.43)       | 549952.26<br>(283966.24,977100.<br>22)       | 1140205.17<br>(604906.95,194173<br>7.17)     | 2059047.99<br>(1230714.45,33551<br>25.17)    | 3499963.18<br>(2016117.2,562420<br>2.18)     | 4987150.34<br>(2902551.23,76644<br>99.48)    | 6175410.79<br>(3569970.62,98314<br>41.59)    |
| <b>Eastern Europe</b>              | 131999312.6<br>(76031405.15,2116<br>61905.5) | 2472584.62<br>(1377224.43,411<br>9900.08)    | 3604335.8<br>(1857896.14,63780<br>16.31)     | 7298399.46<br>(3901203.27,12511<br>506.31)   | 16340979.79<br>(9779184.97,26595<br>492.14)  | 26561731.53<br>(15357769.82,4273<br>5268.79) | 33787966.36<br>(19471896.65,5207<br>0135.82) | 41933315.04<br>(24286229.86,6725<br>1586.07) |
| <b>High income</b>                 | 4917455537<br>(2861484459,7849<br>695053)    | 146458713.2<br>(81023818.97,24<br>6568748.2) | 218300117.5<br>(117721184.1,3879<br>34584.1) | 385639369.3<br>(205280460.7,6312<br>40499.5) | 615794689.2<br>(374571431,10017<br>73128)    | 912288498.8<br>(526726603.8,1453<br>485588)  | 1185990188<br>(703239702.5,1857<br>414396)   | 1452983961<br>(852921258.2,2271<br>278109)   |
| <b>Australasia</b>                 | 6371429.53<br>(3661762.66,10228<br>701.25)   | 197018.34<br>(107926.29,3381<br>11.59)       | 257017.2<br>(133614.24,447985.<br>07)        | 478001.18<br>(258199.28,782822.<br>37)       | 764537.47<br>(462473.7,1246331<br>.79)       | 1115383.29<br>(640194.21,180484<br>5.69)     | 1468067.49<br>(864505.76,228407<br>7.21)     | 2091404.56<br>(1194849.19,33245<br>27.53)    |
| <b>High-income Asia Pacific</b>    | 271934957.8<br>(157460445.1,4340<br>94381.5) | 6021871.01<br>(3254045.26,103<br>75069.43)   | 9220079.66<br>(4819104.98,16638<br>817.72)   | 15851047.14<br>(8575318.54,26197<br>887.95)  | 25020991.03<br>(15112652.65,4064<br>3287.93) | 43322750.53<br>(24713575.48,6950<br>0203.36) | 67907652.44<br>(39748786.81,1045<br>24172.2) | 104590566<br>(61236961.4,16621<br>4942.9)    |
| <b>High-income North America</b>   | 4127188576<br>(2396878597,6615<br>614928)    | 129175949.5<br>(71424085.87,21<br>7423251)   | 194003139.1<br>(104855918.7,3449<br>46897.4) | 341441790.7<br>(181135233.4,5589<br>30891)   | 536134812.3<br>(326599567.8,8736<br>33773)   | 776613913<br>(448999603.2,1242<br>530179)    | 984139642.8<br>(581986562.6,1552<br>048769)  | 1165679328<br>(681877625.1,1826<br>101168)   |
| <b>Southern Latin America</b>      | 15237021.47<br>(8820410.84,23896<br>103.66)  | 485946.75<br>(265487.3,81972<br>8.67)        | 703868.15<br>(375755.35,124300<br>5.65)      | 1202066.81<br>(649046.7,1965435.<br>68)      | 1860399.56<br>(1125887.74,30213<br>26.01)    | 2770244.02<br>(1561309.3,433326<br>6.04)     | 3726173.98<br>(2199313.45,56651<br>40.34)    | 4488322.2<br>(2643611.02,68482<br>01.28)     |
| <b>Western Europe</b>              | 496723552.9<br>(294663244,76586<br>0938.9)   | 10577927.67<br>(5972274.26,176<br>12587.44)  | 14116013.4<br>(7536790.82,24657<br>878.33)   | 26666463.54<br>(14662662.85,4336<br>3462.52) | 52013948.84<br>(31270849.04,8322<br>8408.92) | 88466208.05<br>(50811921.65,1353<br>17094.3) | 128748651.4<br>(78440533.89,1928<br>92237.8) | 176134340.1<br>(105968211.5,2687<br>89269.6) |
| <b>Latin America and Caribbean</b> | 395921860.7<br>(229003555.7,6343<br>36288.6) | 10451815.88<br>(5653510.68,174<br>53352.55)  | 19634117.1<br>(10407113.84,3476<br>0446.29)  | 36713162.9<br>(19700786.54,6048<br>8646.78)  | 54361546.84<br>(33102296.83,8838<br>2625.28) | 76161523.22<br>(44177229.79,1221<br>08452.1) | 92691500.39<br>(54146252.15,1431<br>58686.1) | 105908194.4<br>(61816365.83,1679<br>84079.6) |
| <b>Andean Latin</b>                | 4015299.99                                   | 118413.13                                    | 217577.52                                    | 409975.45                                    | 576678.82                                    | 758561.65                                    | 904953.64                                    | 1029139.78                                   |

|                                               |                                          |                                          |                                          |                                          |                                          |                                          |                                          |                                          |
|-----------------------------------------------|------------------------------------------|------------------------------------------|------------------------------------------|------------------------------------------|------------------------------------------|------------------------------------------|------------------------------------------|------------------------------------------|
| <b>America</b>                                | (2317438.45,6433126.75)                  | (63777.08,199270)                        | (113199.12,377900.17)                    | (219268.35,678092.67)                    | (349634.18,923777.02)                    | (422894.61,1209343.53)                   | (540869.16,1410633.64)                   | (607795.95,1634109.72)                   |
| <b>Caribbean</b>                              | 1699293.18<br>(984257.16,2718427.66)     | 42059.53<br>(22653.19,70779.34)          | 77910.07<br>(40534.31,135318.38)         | 143967.09<br>(76998.37,238119.27)        | 234085.23<br>(141923.4,374979.22)        | 295219.25<br>(164583.37,470655.77)       | 347346.96<br>(207600.93,541441.39)       | 558705.06<br>(329963.58,887134.3)        |
| <b>Central Latin America</b>                  | 89411464.3<br>(51761244.05,143008792.7)  | 2780587.8<br>(1524928.64,4694102.38)     | 4733264.22<br>(2510378.63,8284992.26)    | 8457042.42<br>(4435397.93,14294845.23)   | 12022371.6<br>(7126791.66,19539120.54)   | 16373484.83<br>(9444367.93,26367508.72)  | 20301923.54<br>(12151643.71,31053600.71) | 24742789.89<br>(14567735.56,38774622.81) |
| <b>Tropical Latin America</b>                 | 300795803.3<br>(173940616,482175941.6)   | 7510755.43<br>(4042151.78,12489200.82)   | 14605365.29<br>(7743001.78,25962235.48)  | 27702177.94<br>(14969121.88,45277589.63) | 41528411.18<br>(25483947.59,67544748.5)  | 58734257.49<br>(34145383.88,94060944.05) | 71137276.25<br>(41246138.35,110153010.3) | 79577559.67<br>(46310870.75,126688212.7) |
| <b>North Africa and Middle East</b>           | 218933568<br>(129045944.5,343057266.4)   | 3228636.07<br>(1758309.64,5431292.6)     | 5438756.51<br>(2860936,9448629.74)       | 11857473.82<br>(6277515.14,19797311.19)  | 25245772.13<br>(15313894.32,41008843.45) | 45766519.58<br>(26251861.53,72899662.29) | 60609799.67<br>(36335022.89,92749561.42) | 66786610.25<br>(40248405,101721965.7)    |
| <b>South Asia</b>                             | 1092020556<br>(631053122.2,1770217928)   | 31143930.11<br>(16952883.14,52823387.88) | 45117362.21<br>(23479041.92,79009882.73) | 81018524.04<br>(42338092.68,137722316)   | 134371262.9<br>(79527830.44,217135420.4) | 208935945.3<br>(121509915.7,337298569.9) | 270255002.1<br>(158657258.7,419149477.1) | 321178529.1<br>(188588099.6,527078874.4) |
| <b>Southeast Asia, East Asia, and Oceania</b> | 6789075188<br>(3958639646,11028617382)   | 65340148.27<br>(34983169.57,110584562.1) | 122270482.3<br>(63570011.19,215219102.8) | 307189742.6<br>(160600601.4,523593418.2) | 782253751<br>(465525299,1259937485)      | 1164762126<br>(665301555.8,1964506867)   | 1558389601<br>(901730346.9,2432892364)   | 2788869336<br>(1666928662,4521883582)    |
| <b>East Asia</b>                              | 6628594616<br>(3866468492,10769228312)   | 62665269.39<br>(33543774.13,106097433.7) | 117376519.8<br>(60975262.48,206561059.7) | 297108986.4<br>(155352730,506533952.2)   | 764630931<br>(455299433.6,1231101225)    | 1136192764<br>(649365803.9,1917795463)   | 1516587123<br>(877338867.8,2368194535)   | 2734033022<br>(1634592620,4432944643)    |
| <b>Oceania</b>                                | 31977.2<br>(18437.8,50961.74)            | 709.35<br>(383.08,1214.58)               | 1304.85<br>(689.07,2254.89)              | 2579.17<br>(1355.46,4324.17)             | 4131.46<br>(2453.89,6621.32)             | 5942.56<br>(3413.58,9703.14)             | 7841.07<br>(4646.59,12055.27)            | 9468.75<br>(5496.12,14788.38)            |
| <b>Southeast Asia</b>                         | 160448594.5<br>(92152716.22,259338108.2) | 2674169.53<br>(1439012.36,4485913.85)    | 4892657.7<br>(2594059.64,8655788.16)     | 10078176.97<br>(5246515.94,17055141.89)  | 17618688.47<br>(10223411.57,28829638.35) | 28563418.91<br>(15932338.3,46701701.52)  | 41794637.39<br>(24386832.48,64685774.26) | 54826845.54<br>(32330545.93,88924150.18) |

|                                    |                                          |                                       |                                       |                                        |                                        |                                         |                                          |                                          |
|------------------------------------|------------------------------------------|---------------------------------------|---------------------------------------|----------------------------------------|----------------------------------------|-----------------------------------------|------------------------------------------|------------------------------------------|
| <b>Sub-Saharan Africa</b>          | 73604874.66<br>(42639193.38,118155893)   | 2561525.91<br>(1414296.96,4315974.07) | 3472952.52<br>(1838667.46,6169408.76) | 6044293.09<br>(3237398.94,10158087.86) | 9382802.81<br>(5652220.32,15303633.83) | 14026482.94<br>(8069247.31,22644069.63) | 17840310.86<br>(10511590.21,27168519.27) | 20276506.54<br>(11915772.18,32396199.59) |
| <b>Central Sub-Saharan Africa</b>  | 1789904.42<br>(1035738.22,2848719.6)     | 67600.71<br>(36452.46,113930.08)      | 88145.47<br>(47261.64,154760.97)      | 150734.4<br>(82226.73,246909.8)        | 238955.11<br>(143587.31,392668.46)     | 346020.52<br>(196092.47,555355.36)      | 430276.89<br>(254183.62,652607.6)        | 468171.32<br>(275933.98,732487.33)       |
| <b>Eastern Sub-Saharan Africa</b>  | 6299953.56<br>(3624490.34,10195868.49)   | 229673.46<br>(122533.43,395534.38)    | 308592.19<br>(162483.98,541939.15)    | 530854.77<br>(279419.97,900364.42)     | 847312.5<br>(500746.03,1374577.7)      | 1258224.69<br>(708105.03,2077318.18)    | 1536299.9<br>(896950.31,2388741.02)      | 1588996.06<br>(954251.6,2517393.64)      |
| <b>Southern Sub-Saharan Africa</b> | 19418778.36<br>(11163907.71,31092443.33) | 419180.13<br>(227843.04,710788.21)    | 638496.48<br>(338251.99,1128591.37)   | 1387787.91<br>(718905.94,2343024.95)   | 2544137.11<br>(1489853.81,4282081.29)  | 3974619.92<br>(2279770.48,6392459.44)   | 4887985.98<br>(2833632.48,7300095.44)    | 5566570.83<br>(3275649.97,8935402.63)    |
| <b>Western Sub-Saharan Africa</b>  | 46096238.32<br>(26815057.1,74018861.58)  | 1845071.61<br>(1027468.03,3095721.4)  | 2437718.38<br>(1290669.85,434417.26)  | 3974916.01<br>(2156846.3,6667788.68)   | 5752398.08<br>(3518033.17,9254306.38)  | 8447617.81<br>(4885279.34,13618936.65)  | 10985748.09<br>(6526823.79,16827075.21)  | 12652768.32<br>(7409936.62,20210915.99)  |

**Table S10. Total healthcare expenditure for women of reproductive age in all age groups due to low back pain globally and across regions in 2021**

| Location                                                | Total healthcare expenditure (95% uncertainty interval, 2020 US\$) |                                              |                                              |                                              |                                              |                                              |                                              |                                              |
|---------------------------------------------------------|--------------------------------------------------------------------|----------------------------------------------|----------------------------------------------|----------------------------------------------|----------------------------------------------|----------------------------------------------|----------------------------------------------|----------------------------------------------|
|                                                         | All ages (15-49 years)                                             | 15-19 years                                  | 20-24 years                                  | 25-29 years                                  | 30-34 years                                  | 35-39 years                                  | 40-44 years                                  | 45-49 years                                  |
| <b>Global</b>                                           | 16701360205<br>(12712578082,214<br>60601532)                       | 664440945.3<br>(503948005.2,8<br>51753657.4) | 854303908.4<br>(644267655.5,1105<br>458960)  | 1355405182<br>(1034196678,17428<br>80307)    | 2119468294<br>(1616481664,27272<br>59489)    | 2903856369<br>(2246560500,3675<br>534869)    | 3589091758<br>(2733123816,4600<br>991426)    | 5214793747<br>(3933999763,67567<br>22823)    |
| <b>SDI quantile</b>                                     |                                                                    |                                              |                                              |                                              |                                              |                                              |                                              |                                              |
| <b>High SDI</b>                                         | 8394423862<br>(6773832632,1028<br>0053894)                         | 343167627.1<br>(274548095.4,4<br>22647722)   | 446039612.7<br>(357930956.2,5510<br>93783.7) | 753251833.6<br>(607964971.3,9219<br>49789.5) | 1143567497<br>(921916466.7,1405<br>906910)   | 1528180324<br>(1246349004,1848<br>400144)    | 1846858554<br>(1497580593,2249<br>158623)    | 2333358413<br>(1867542546,28808<br>96922)    |
| <b>High-middle SDI</b>                                  | 5312972482<br>(3793504955,7174<br>036213)                          | 177545712.4<br>(127014335.4,2<br>36992783)   | 221878169.5<br>(155125041,301501<br>177.8)   | 334343190.2<br>(235083880.6,4580<br>20981.3) | 607149681.8<br>(432633673.9,8223<br>35332.1) | 847368482.8<br>(613767747.6,1131<br>072502)  | 1081775504<br>(764943472.4,1471<br>077506)   | 2042911742<br>(1464936805,27530<br>35931)    |
| <b>Low SDI</b>                                          | 11669155.02<br>(8344825.6,157719<br>17.81)                         | 922698.09<br>(656938.04,125<br>0509.05)      | 1010109.46<br>(709981.96,137915<br>3.4)      | 1357635.09<br>(964868.28,183540<br>4.83)     | 1701740.45<br>(1207740.6,230122<br>3.09)     | 2079763.68<br>(1523273.51,27971<br>20.18)    | 2216873.81<br>(1592722.96,29747<br>75.87)    | 2380334.44<br>(1689300.25,32337<br>31.38)    |
| <b>Low-middle SDI</b>                                   | 2180406352<br>(1559959190,2917<br>541141)                          | 107311418.1<br>(76222650.91,1<br>43704255.3) | 136155236.7<br>(95334495.4,18446<br>8107.9)  | 192824389.1<br>(136757159.3,2624<br>65835.8) | 263607402.1<br>(186590622.6,3581<br>40299.4) | 378718195.3<br>(275912700.4,4990<br>70815.7) | 479339827.7<br>(341795222.9,6380<br>82286.9) | 622449883.4<br>(447346338.9,8316<br>09539.7) |
| <b>Middle SDI</b>                                       | 801888354<br>(576936478.3,1073<br>198366)                          | 35493489.57<br>(25505985.53,4<br>7158388)    | 49220780.07<br>(35167180.94,6701<br>6737.5)  | 73628134.47<br>(53425798.29,9860<br>8295.54) | 103441973<br>(74133160.63,1385<br>75724.1)   | 147509603.1<br>(109007774.6,1941<br>94287.6) | 178900998.6<br>(127211804.6,2396<br>98234)   | 213693375.2<br>(152484773.7,2879<br>46699)   |
| <b>Central Europe, Eastern Europe, and Central Asia</b> | 252719343.1<br>(183194144.8,3351<br>05353.3)                       | 7836452.54<br>(5643246.38,10<br>385093.14)   | 8210472.96<br>(5869263.56,11155<br>701.84)   | 13178999.23<br>(9493607.02,17631<br>623.97)  | 27766752.12<br>(19955620.57,3719<br>2285.33) | 47964905.11<br>(35510147.63,6268<br>9334.11) | 63608132.21<br>(45551631.32,8400<br>7710.94) | 84153628.9<br>(61170628.28,1120<br>43604)    |
| <b>Central Asia</b>                                     | 4569818.57<br>(3277010.8,616664)                                   | 184847.5<br>(131502.25,252)                  | 204000.63<br>(141855.1,281638.0)             | 354771.67<br>(252893.99,476374.              | 605813.82<br>(427753.14,824042.              | 850142.48<br>(628336.63,113479)              | 1034205.65<br>(741001.2,1385153)             | 1336036.82<br>(953668.49,181242)             |

|                                    |                                              |                                              |                                              |                                              |                                              |                                              |                                              |                                              |
|------------------------------------|----------------------------------------------|----------------------------------------------|----------------------------------------------|----------------------------------------------|----------------------------------------------|----------------------------------------------|----------------------------------------------|----------------------------------------------|
|                                    | 1.78)                                        | 208.63)                                      | 4)                                           | 74)                                          | 62)                                          | 4.82)                                        | .2)                                          | 9.74)                                        |
| <b>Central Europe</b>              | 37426886.56<br>(27186874.04,4930<br>2450.48) | 1176242.65<br>(852797.04,155<br>4525.16)     | 1417834.1<br>(1022411.59,19258<br>79.83)     | 2275127.02<br>(1652267.34,30078<br>09.15)    | 3949211.84<br>(2822754.77,52348<br>44.32)    | 6753203.04<br>(4986632.25,87885<br>65.2)     | 9427186.98<br>(6816653.87,12401<br>128.87)   | 12428080.93<br>(9033357.17,16389<br>697.94)  |
| <b>Eastern Europe</b>              | 210722637.9<br>(152730259.9,2796<br>36261)   | 6475362.39<br>(4658947.1,857<br>8359.36)     | 6588638.24<br>(4704996.87,89481<br>83.98)    | 10549100.54<br>(7588445.69,14147<br>440.09)  | 23211726.47<br>(16705112.67,3113<br>3398.38) | 40361559.59<br>(29895178.75,5276<br>5974.09) | 53146739.58<br>(37993976.25,7022<br>1428.87) | 70389511.14<br>(51183602.61,9384<br>1476.29) |
| <b>High income</b>                 | 8480259148<br>(6834067419,1039<br>8451380)   | 346748812.1<br>(277120114.3,4<br>27424024.1) | 450458010.4<br>(36099500.1,5571<br>62035.4)  | 759329358.8<br>(612239185.8,9302<br>81186.7) | 1151383245<br>(927418955.8,1416<br>675204)   | 1539691443<br>(1254504748,1864<br>403383)    | 1866558675<br>(1511330164,2276<br>217013)    | 2366089604<br>(1890454752,29262<br>88534)    |
| <b>Australasia</b>                 | 28427292.81<br>(20644299.81,3780<br>0541.33) | 1050517.55<br>(775000.98,139<br>1774.72)     | 1714185.02<br>(1225912.77,23008<br>81.66)    | 2781255.8<br>(1993666.86,37113<br>67.55)     | 3839934.23<br>(2756122.68,51919<br>70.83)    | 5254268.8<br>(3884279.8,688442<br>4.97)      | 5986650.66<br>(4307031.02,79734<br>69.2)     | 7800480.75<br>(5702285.71,10346<br>652.39)   |
| <b>High-income Asia Pacific</b>    | 592478080.2<br>(429264118.8,7836<br>95842.3) | 20124696.54<br>(14663721.92,2<br>6363501.95) | 28183609.6<br>(20061981.75,3803<br>7529.77)  | 42068412<br>(30944577.77,5582<br>7082.43)    | 59576778.71<br>(42530319.81,7929<br>5628.84) | 94555347.37<br>(70290955.71,1244<br>49318.7) | 136053614.9<br>(97575000.65,1787<br>17087.8) | 211915621.1<br>(153197561.2,2810<br>05692.8) |
| <b>High-income North America</b>   | 7209977971<br>(5914468853,8707<br>639916)    | 299172671<br>(242506545.1,3<br>64645953.3)   | 385941969.6<br>(315129548.1,4699<br>58262.6) | 661413877.1<br>(540889372.2,7995<br>33387.3) | 1009248303<br>(825966141.4,1226<br>793011)   | 1328963744<br>(1098308735,1585<br>855982)    | 1578539980<br>(1304167826,1895<br>249660)    | 1946697426<br>(1587500686,23656<br>03660)    |
| <b>Southern Latin America</b>      | 34754441.9<br>(25182185.21,4620<br>3072.27)  | 1530430.89<br>(1112494.37,20<br>28567.29)    | 2202187.51<br>(1550304.75,29717<br>52.1)     | 3320387.86<br>(2382490.54,44287<br>49)       | 4542551.89<br>(3284139.02,60311<br>01.16)    | 6249395.56<br>(4620077.36,82304<br>01.88)    | 7697116.16<br>(5570908.71,10268<br>093.07)   | 9212372.03<br>(6661770.46,12244<br>407.76)   |
| <b>Western Europe</b>              | 614621362<br>(444507962.3,8231<br>12007.7)   | 24870496.05<br>(18062351.91,3<br>2994226.84) | 32416058.62<br>(23031752.78,4389<br>3609.27) | 49745426.04<br>(36029078.46,6678<br>0600.44) | 74175676.4<br>(52882232.91,9936<br>3491.96)  | 104668686.7<br>(77400699.85,1389<br>83255.5) | 138281313.8<br>(99709397.68,1840<br>08703.1) | 190463704.4<br>(137392448.7,2570<br>88120.6) |
| <b>Latin America and Caribbean</b> | 559202371.9<br>(403049676.3,7471<br>54518.1) | 26139086.21<br>(18818116.5,34<br>669892.77)  | 36524593.65<br>(26030651.88,4965<br>4318.88) | 52854118.88<br>(38491617.97,7071<br>8009.54) | 72101245.95<br>(51878558.96,9622<br>4961.4)  | 102390834<br>(75732628.31,1346<br>02102)     | 123512885.9<br>(87967249.09,1648<br>57205.9) | 145679607.3<br>(104130853.6,1964<br>28027.6) |
| <b>Andean Latin</b>                | 3704589.58                                   | 184860.35                                    | 251207.09                                    | 384343.24                                    | 505509.86                                    | 662252.81                                    | 782842.69                                    | 933573.53                                    |

|                                                       |                                              |                                              |                                              |                                              |                                              |                                              |                                              |                                              |
|-------------------------------------------------------|----------------------------------------------|----------------------------------------------|----------------------------------------------|----------------------------------------------|----------------------------------------------|----------------------------------------------|----------------------------------------------|----------------------------------------------|
| <b>America</b>                                        | (2628970.05,50421<br>94.26)                  | (131032.8,2464<br>15.83)                     | (175754.57,340606.<br>12)                    | (272870.64,519264.<br>49)                    | (357611.15,689730.<br>8)                     | (475581.63,882971<br>.5)                     | (557483.98,107155<br>0.88)                   | (658635.27,129165<br>4.65)                   |
| <b>Caribbean</b>                                      | 1720861.08<br>(1280237.01,22603<br>20.13)    | 72119.26<br>(52891.96,9699<br>2.53)          | 100312.02<br>(71479.57,135007.2<br>3)        | 149571.99<br>(109290.77,198414.<br>29)       | 222107.11<br>(164292.05,291626.<br>33)       | 278377.44<br>(208388.83,364026<br>.72)       | 332592.9<br>(249900.41,434426<br>.77)        | 565780.36<br>(423993.43,739826.<br>25)       |
| <b>Central Latin<br/>America</b>                      | 119042420.6<br>(85661142.72,1596<br>10811.5) | 5381681.46<br>(3887949.36,71<br>17435.86)    | 7925018.41<br>(5613326.68,10873<br>595.32)   | 12575205.16<br>(9059315.51,16826<br>229.5)   | 16645335.26<br>(11832367.89,2223<br>0332.15) | 21306179.58<br>(15725472.01,2817<br>3004.6)  | 24997134.66<br>(18001987.18,3343<br>0902.57) | 30211866.03<br>(21540724.08,4095<br>9311.52) |
| <b>Tropical Latin<br/>America</b>                     | 434734500.7<br>(313479326.5,5802<br>41192.2) | 20500425.14<br>(14746242.37,2<br>7209048.56) | 28248056.13<br>(20170091.05,3830<br>5110.22) | 39744998.49<br>(29050141.05,5317<br>4101.26) | 54728293.73<br>(39524287.87,7301<br>3272.12) | 80144024.21<br>(59323185.84,1051<br>82099.1) | 97400315.67<br>(69157877.52,1299<br>20325.7) | 113968387.3<br>(81507500.81,1534<br>37235.2) |
| <b>North Africa<br/>and Middle<br/>East</b>           | 161478081.3<br>(115968822.9,2172<br>61274.2) | 9260037.18<br>(6672244.55,12<br>394879.27)   | 10330110.86<br>(7386904.64,14048<br>332.97)  | 15156597.08<br>(10924046.21,2044<br>6071.45) | 22879444.46<br>(16294950.99,3080<br>3649.19) | 31984124.46<br>(23480914.98,4228<br>1895.05) | 35064622.36<br>(25018796.44,4715<br>9455.59) | 36803144.86<br>(26190965.08,5012<br>6990.7)  |
| <b>South Asia</b>                                     | 2111566312<br>(1510603748,2825<br>018390)    | 102318999.2<br>(72643828,1369<br>53672.4)    | 130686388.8<br>(91435145.18,1770<br>33338.9) | 185410697.3<br>(131464908.5,2524<br>43306.9) | 254013825.5<br>(179770450.2,3452<br>52477)   | 366164752.1<br>(266685496,48237<br>4430.8)   | 465526385.3<br>(331895237.9,6196<br>16612.8) | 607445263.7<br>(436708681.9,8113<br>44551.1) |
| <b>Southeast Asia,<br/>East Asia, and<br/>Oceania</b> | 5083179157<br>(3627823390,6866<br>477457)    | 168784584.3<br>(120660663.2,2<br>25390563.5) | 214190885.9<br>(149780704.3,2910<br>75923.6) | 323863007.8<br>(227593211.4,4437<br>84564)   | 583923156.6<br>(415914010,791180<br>737.6)   | 806028468.2<br>(583580211.2,1076<br>410631)  | 1024118078<br>(723704921.5,1394<br>814273)   | 1962270976<br>(1406589669,26438<br>20764)    |
| <b>East Asia</b>                                      | 4905679636<br>(3500990050,6627<br>303526)    | 162569202.4<br>(116237368.1,2<br>17089634.4) | 204940851.3<br>(143129657.4,2784<br>25147.7) | 308712124.1<br>(216741491.4,4234<br>00043.3) | 562274373.4<br>(400593700,761763<br>776.5)   | 774840519.4<br>(560606779.1,1034<br>969113)  | 983028871.2<br>(694660777.3,1339<br>054089)  | 1909313694<br>(1369020277,25726<br>01722)    |
| <b>Oceania</b>                                        | 35799.37<br>(25489.8,48469.72)               | 1785.48<br>(1258.09,2401.9<br>8)             | 2525.67<br>(1740.66,3463.18)                 | 3762.98<br>(2643.74,5136.93)                 | 4843.15<br>(3459.01,6544.43)                 | 6358.14<br>(4649.03,8486.67)                 | 7575.4<br>(5405.31,10259.01)                 | 8948.54<br>(6333.97,12177.52)                |
| <b>Southeast Asia</b>                                 | 177463721.6<br>(126807850.4,2391<br>25462.1) | 6213596.34<br>(4422037.02,82<br>98527.06)    | 9247508.88<br>(6649306.22,12647<br>312.75)   | 15147120.75<br>(10849076.18,2037<br>9383.83) | 21643939.99<br>(15316851.01,2941<br>0416.73) | 31181590.61<br>(22968783.09,4143<br>3032.1)  | 41081631.47<br>(29038738.92,5574<br>9925.33) | 52948333.54<br>(37563057.92,7120<br>6864.33) |

|                                    |                                              |                                           |                                           |                                           |                                           |                                            |                                             |                                             |
|------------------------------------|----------------------------------------------|-------------------------------------------|-------------------------------------------|-------------------------------------------|-------------------------------------------|--------------------------------------------|---------------------------------------------|---------------------------------------------|
| <b>Sub-Saharan Africa</b>          | 52955791.78<br>(37870881.12,7113<br>3158.96) | 3352973.85<br>(2389792.29,45<br>35532.23) | 3903445.85<br>(2765485.79,53293<br>08.66) | 5612403.33<br>(3990100.95,75755<br>44.36) | 7400624.73<br>(5249117.84,99301<br>74.71) | 9631842.61<br>(7066354.68,12773<br>092.79) | 10702979.23<br>(7655815.62,14319<br>154.08) | 12351522.18<br>(8754213.97,16670<br>352.13) |
| <b>Central Sub-Saharan Africa</b>  | 1741165.08<br>(1231481.61,23613<br>21.84)    | 128047.48<br>(90466.24,1763<br>48.94)     | 138971.97<br>(96424.84,191995.8<br>7)     | 191232.7<br>(134426.46,257796.<br>49)     | 252493.22<br>(178106.13,343576.<br>01)    | 314618.04<br>(227065.31,422515<br>.44)     | 343691.8<br>(246273.12,461791<br>.35)       | 372109.89<br>(258719.51,507297.<br>76)      |
| <b>Eastern Sub-Saharan Africa</b>  | 8105711.01<br>(5794972.83,10930<br>383.7)    | 595358.17<br>(420714.09,806<br>106.83)    | 691747.77<br>(487077.77,938889.<br>48)    | 950585.67<br>(678866.95,128323<br>8.97)   | 1209273.51<br>(857394.26,163573<br>5)     | 1482575.79<br>(1089158.76,19867<br>05.85)  | 1543981.91<br>(1103990.36,20716<br>37)      | 1632188.18<br>(1157770.65,22080<br>70.57)   |
| <b>Southern Sub-Saharan Africa</b> | 12894909.26<br>(9216949.22,17341<br>865.16)  | 497940.11<br>(357588.87,670<br>492.05)    | 650295.77<br>(461088.33,897239.<br>6)     | 1191929.17<br>(847127.96,159751<br>6)     | 1841328.34<br>(1301954.94,24565<br>72.46) | 2475061.01<br>(1798442.45,32933<br>94.4)   | 2735818.53<br>(1967385.03,36909<br>10.97)   | 3502536.33<br>(2483361.64,47357<br>39.67)   |
| <b>Western Sub-Saharan Africa</b>  | 30214006.43<br>(21627477.47,4049<br>9588.25) | 2131628.08<br>(1521023.1,288<br>2584.41)  | 2422430.34<br>(1720894.85,33011<br>83.71) | 3278655.79<br>(2329679.58,44369<br>92.91) | 4097529.66<br>(2911662.51,54942<br>91.24) | 5359587.77<br>(3951688.16,70704<br>77.1)   | 6079487<br>(4338167.11,80948<br>14.75)      | 6844687.78<br>(4854362.17,92192<br>44.13)   |

**Table S11. Total healthcare expenditure for women of reproductive age in all age groups due to rheumatoid arthritis in 204 countries or territories in 2021**

| Location            | Total healthcare expenditure (95% uncertainty interval, 2020 US\$) |                                    |                                    |                                     |                                    |                                       |                                       |                                       |
|---------------------|--------------------------------------------------------------------|------------------------------------|------------------------------------|-------------------------------------|------------------------------------|---------------------------------------|---------------------------------------|---------------------------------------|
|                     | All ages (15-49 years)                                             | 15-19 years                        | 20-24 years                        | 25-29 years                         | 30-34 years                        | 35-39 years                           | 40-44 years                           | 45-49 years                           |
| Afghanistan         | 145301.25<br>(109964.76,184855.79)                                 | 6129.99<br>(4166.44,8422.92)       | 18232.02<br>(12505.3,25842.15)     | 24143.07<br>(17260.13,31970.82)     | 22372.62<br>(16738.67,28468.01)    | 21394.38<br>(16568.02,26695.09)       | 20104.56<br>(15906.57,24207.6)        | 32924.63<br>(26819.65,39249.2)        |
| Albania             | 7279.59<br>(5318.52,9524.06)                                       | 103.72<br>(66.54,148.49)           | 419.98<br>(268.86,601.67)          | 712.8<br>(495.78,971.34)            | 963.91<br>(682.82,1299.03)         | 1242.79<br>(916.35,1619.29)           | 1460.33<br>(1067.19,1880.78)          | 2376.06<br>(1820.98,3003.45)          |
| Algeria             | 1484855.42<br>(1136768.49,1883716.3)                               | 24279.32<br>(16122.55,33432.79)    | 84319.82<br>(57461.06,116122.48)   | 158833.59<br>(116198.33,206738)     | 242068.11<br>(182268.61,309610.72) | 324931.29<br>(252545.35,415599.5)     | 306292.06<br>(241547.55,378198.56)    | 344131.24<br>(270625.03,424014.26)    |
| American Samoa      | 1.1 (0.8,1.43)                                                     | 0.03 (0.02,0.05)                   | 0.08 (0.05,0.12)                   | 0.11 (0.08,0.15)                    | 0.15 (0.11,0.2)                    | 0.19 (0.14,0.25)                      | 0.22 (0.17,0.28)                      | 0.3 (0.23,0.37)                       |
| Andorra             | 41.63 (31.49,53.48)                                                | 0.51 (0.33,0.71)                   | 1.76 (1.16,2.52)                   | 2.85 (2.01,3.91)                    | 4.66 (3.4,6.19)                    | 7.27 (5.53,9.42)                      | 9.61 (7.27,12.14)                     | 14.96 (11.78,18.59)                   |
| Angola              | 116692.95<br>(83171.5,155937.07)                                   | 2985.95<br>(1807.49,4492.22)       | 8376.32<br>(5137.39,12880.1)       | 12910.48<br>(8710.57,18182.53)      | 17747.8<br>(12374.77,24609.08)     | 22119.53<br>(15882.88,29301.61)       | 23603.99<br>(17183.51,30461.98)       | 28948.89<br>(22074.89,36009.55)       |
| Antigua and Barbuda | 16.83 (12.21,22.38)                                                | 0.21 (0.13,0.3)                    | 0.83 (0.52,1.23)                   | 1.45 (1,2)                          | 2.2 (1.56,3.06)                    | 3.18 (2.33,4.26)                      | 3.63 (2.65,4.74)                      | 5.31 (4.01,6.78)                      |
| Argentina           | 10672300.72<br>(7940020.75,13721737.21)                            | 163154.78<br>(104980.41,236604.18) | 554224.98<br>(347921.93,818215.04) | 940280.16<br>(633121.39,1313097.72) | 1404337<br>(953761.01,1893099.76)  | 2018998.89<br>(1521437.74,262404.19)  | 2408871.21<br>(1831122.12,3001981.07) | 3182433.69<br>(2547676.14,3834735.25) |
| Armenia             | 14360.69<br>(10691.83,18814.47)                                    | 152.43<br>(97.23,221.63)           | 557.21<br>(351.4,816.11)           | 1295.64<br>(877.64,1756.99)         | 2404.97<br>(1732.26,3324.37)       | 3193.44<br>(2412.19,4173.54)          | 3090.97<br>(2363.32,3937.02)          | 3666.02<br>(2857.8,4584.81)           |
| Australia           | 8398588.81<br>(5997539.86,11152728.59)                             | 104206.05<br>(66585.49,146650.57)  | 369835.57<br>(238531.65,540472.56) | 697373.68<br>(482140.26,971994.14)  | 1112351.63<br>(792400.8,1545738.7) | 1607476.89<br>(1156296.07,2146187.38) | 1768228.38<br>(1240804.29,2291803.53) | 2739116.63<br>(2020781.3,3509881.72)  |
| Austria             | 1170756.18                                                         | 13297.21                           | 49875.48                           | 95962.01                            | 147244.04                          | 205528.76                             | 249433.53                             | 409415.16                             |

|                           |                                       |                                  |                                    |                                    |                                  |                                      |                                      |                                      |
|---------------------------|---------------------------------------|----------------------------------|------------------------------------|------------------------------------|----------------------------------|--------------------------------------|--------------------------------------|--------------------------------------|
|                           | (851722.25,1548003.31)                | (8449.45,18831.88)               | (32037.97,73037.97)                | (63567.37,131397.59)               | (102067.03,195502.83)            | (151655.39,267518.54)                | (181286.74,332362.67)                | (312658.29,529351.83)                |
| Azerbaijan                | 56178.07<br>(42173.59,73619.76)       | 854.02<br>(559.41,1211.16)       | 3188.15<br>(2075.69,4571.06)       | 6767.92<br>(4850.22,9103.18)       | 10360.21<br>(7630.22,13836.62)   | 11856.68<br>(8995.46,15795.64)       | 10554.26<br>(8207.33,13370.55)       | 12596.83<br>(9855.25,15731.55)       |
| Bahamas                   | 641.22<br>(477.59,835.69)             | 10.38 (6.57,14.95)               | 34.25 (21.81,49.89)                | 59.74 (41.4,80.52)                 | 87.85<br>(63.08,119.71)          | 119.78<br>(90.24,157.65)             | 138.78<br>(105.08,175.33)            | 190.43<br>(149.4,237.62)             |
| Bahrain                   | 13262.72<br>(9288.78,17870.94)        | 160.42<br>(100.97,244.32)        | 651.78<br>(416,997.66)             | 1204.74<br>(804.46,1698.14)        | 1926.41<br>(1309.21,2745.74)     | 2533.14<br>(1698.01,3491.7)          | 3093.76<br>(2154.52,4058.37)         | 3692.48<br>(2805.62,4635)            |
| Bangladesh                | 5475046.96<br>(4129753.14,6989573.05) | 112366.12<br>(74099.9,158991.04) | 411784.01<br>(273571.39,587814.32) | 659987.25<br>(471380.74,872061.12) | 876178<br>(653346.52,1118720.15) | 1042572.82<br>(799654.04,1322794.98) | 1059371.99<br>(820484.21,1313198.83) | 1312786.77<br>(1037216.35,1615992.6) |
| Barbados                  | 191.35<br>(138.43,254.98)             | 2.01 (1.27,2.98)                 | 7.72 (4.82,11.36)                  | 13.92 (9.4,18.91)                  | 22.37 (15.27,30.88)              | 34.8 (24.88,46.11)                   | 42.15 (30.67,56.33)                  | 68.38 (52.11,88.4)                   |
| Belarus                   | 123696.22<br>(90658.95,165322.57)     | 902.82<br>(539.68,1365.11)       | 3245.81<br>(1961.29,4889.13)       | 7184.51<br>(4782.88,9897.18)       | 15626.47<br>(10836.23,21979)     | 25481.1<br>(18872.42,34428.23)       | 29138.59<br>(21330.19,38405.08)      | 42116.92<br>(32336.26,54358.84)      |
| Belgium                   | 1513354.42<br>(1094364.98,2011502.92) | 20363.48<br>(12733.66,28503.09)  | 70269.76<br>(44424.15,102055.25)   | 125937.13<br>(83900.77,175556.48)  | 192779.4<br>(134983.2,265853.52) | 272365.26<br>(198452.9,366462.09)    | 330479.9<br>(240072.59,434961.09)    | 501159.49<br>(379797.71,638111.38)   |
| Belize                    | 137.78<br>(100.65,182.14)             | 2.93 (1.85,4.38)                 | 9.9 (6.31,14.95)                   | 15.31 (10.54,20.96)                | 20.98 (14.75,28.67)              | 26.94 (19.87,35.52)                  | 27.49 (20.72,34.78)                  | 34.23 (26.6,42.87)                   |
| Benin                     | 6705.32<br>(4739.75,9079.16)          | 237.08<br>(145.68,346.11)        | 692.33<br>(429.91,1036.1)          | 951.45<br>(633.83,1331.06)         | 1089.12<br>(765.81,1478.07)      | 1231.15<br>(899.45,1638.26)          | 1189.87<br>(877.2,1560.1)            | 1314.31<br>(987.85,1689.44)          |
| Bermuda                   | 37.34 (27.41,49.73)                   | 0.37 (0.23,0.53)                 | 1.34 (0.86,1.97)                   | 2.52 (1.77,3.44)                   | 4.47 (3.19,6.24)                 | 7.28 (5.44,9.92)                     | 8.82 (6.47,11.53)                    | 12.55 (9.44,16.11)                   |
| Bhutan                    | 391.91<br>(285.81,515.74)             | 7.71 (5,10.97)                   | 28.63 (18.1,40.98)                 | 47.82 (33.94,64.46)                | 67.36 (48.59,91.1)               | 80.12<br>(59.12,105.76)              | 75.27 (56.34,95.6)                   | 85 (64.73,106.87)                    |
| Bolivia<br>(Plurinational | 182931.18<br>(135127.49,234955.       | 3380.45<br>(2239.87,4848.36)     | 12537.57<br>(8206.57,18049.59)     | 20920.5<br>(14785.79,28173.1       | 28023.76<br>(20003.76,36668.35   | 35330.72<br>(26034.93,44504.46       | 37029.35<br>(27938.93,46456.1)       | 45708.85<br>(35917.63,56255.11)      |

|                        |                                              |                                          |                                             |                                              |                                              |                                             |                                              |                                              |
|------------------------|----------------------------------------------|------------------------------------------|---------------------------------------------|----------------------------------------------|----------------------------------------------|---------------------------------------------|----------------------------------------------|----------------------------------------------|
| State of)              | 08)                                          |                                          |                                             | 1)                                           | )                                            | )                                           |                                              |                                              |
| Bosnia and Herzegovina | 31921.61<br>(24635.03,40304.52<br>)          | 315.68<br>(221.44,429.08)                | 1265.05<br>(877.52,1709.75)                 | 2208.34<br>(1656.13,2797.59)                 | 3447.72<br>(2622.74,4387.96)                 | 5532.63<br>(4374.95,6957.26)                | 7686.94<br>(5924.55,9811.11)                 | 11465.25<br>(8957.7,14211.78)                |
| Botswana               | 10022.16<br>(7508.49,13152.28)               | 135 (83.39,201.16)                       | 495.79<br>(312.79,731.17)                   | 1024.14<br>(723.94,1355.01)                  | 1666.1<br>(1209.9,2269.78)                   | 2309.13<br>(1758.4,3076.73)                 | 2103.27<br>(1607.91,2668.91)                 | 2288.74<br>(1812.16,2849.51)                 |
| Brazil                 | 151593026.7<br>(117424276,189155<br>499.7)   | 2846019.7<br>(1963139.64,3825<br>818.58) | 11492227.37<br>(8108137.42,15829<br>847.58) | 18083793.54<br>(13434693.76,2327<br>6461.37) | 24041995.57<br>(18091827.68,3027<br>5351.15) | 31063898.3<br>(24369080.13,3857<br>8718.75) | 30162232.19<br>(23893785.83,36360<br>088.14) | 33902860.06<br>(27563611.56,41009<br>214.17) |
| Brunei Darussalam      | 719.8<br>(520.83,950.65)                     | 9.16 (5.7,13.24)                         | 34.19 (21.65,51.09)                         | 62.72 (42.25,87.98)                          | 99.54<br>(69.51,140.44)                      | 139.22<br>(100.71,184.83)                   | 156.66<br>(113.84,201.28)                    | 218.3<br>(167.17,271.78)                     |
| Bulgaria               | 95138.76<br>(70930.32,123161.7<br>9)         | 1018.75<br>(663.86,1462.82)              | 3341.4<br>(2170.45,4804.24)                 | 6129.71<br>(4263.26,8200.51)                 | 11872.19<br>(8609.17,16005)                  | 17191.57<br>(12718.07,22360.63<br>)         | 21711.34<br>(16181.17,27902.1)               | 33873.8<br>(26324.34,42426.5)                |
| Burkina Faso           | 26145.13<br>(18150.75,35062.93<br>)          | 937.61<br>(572.08,1360.32)               | 2630.64<br>(1643.5,3871.15)                 | 3612.7<br>(2399.84,5041.36)                  | 4459.53<br>(3036.98,5907.55)                 | 5147.76<br>(3704.18,6780.48)                | 4465.62<br>(3226.86,5805.51)                 | 4891.27<br>(3567.31,6296.56)                 |
| Burundi                | 5880.22<br>(4052.03,8130.75)                 | 185.83<br>(109.05,276.55)                | 510.74<br>(306.38,782.1)                    | 725.72<br>(479.18,1018.04)                   | 1009.99<br>(696.36,1434.13)                  | 1219.45<br>(861.79,1677.54)                 | 1067.37<br>(747.85,1421.95)                  | 1161.12<br>(851.43,1520.45)                  |
| Cabo Verde             | 86.25<br>(60.64,115.84)                      | 1.78 (1.11,2.6)                          | 5.96 (3.76,8.8)                             | 10.17 (6.77,13.91)                           | 15.04 (10.47,20.49)                          | 18.31 (13.13,24.17)                         | 16.03 (11.46,21.06)                          | 18.94 (13.94,24.81)                          |
| Cambodia               | 32770.38<br>(22640.08,45104.23<br>)          | 646.76<br>(384.37,958.5)                 | 2073.28<br>(1253.42,3181.91)                | 3586.66<br>(2308.55,5198.8)                  | 5111.09<br>(3461.8,7145.18)                  | 6665.47<br>(4701.85,9136.2)                 | 6487.71<br>(4531.95,8743.23)                 | 8199.42<br>(5998.14,10740.42)                |
| Cameroon               | 62179.96<br>(43585.1,83223.48)               | 2109.45<br>(1337.82,3053.37)             | 6037.57<br>(3787.63,8891.31)                | 8627.1<br>(5677.47,11833.45)                 | 10855.76<br>(7492.02,14742.2)                | 12235.73<br>(8819.33,16309.61)              | 10741.6<br>(7826.78,13708.25)                | 11572.74<br>(8644.05,14685.27)               |
| Canada                 | 21454936.68<br>(19946785.85,23052<br>498.62) | 259795.12<br>(228889.15,29282<br>8.66)   | 854794.52<br>(775361.94,938875.<br>09)      | 1592749.53<br>(1474720.09,17136<br>48.06)    | 2587690.19<br>(2377611.14,28160<br>53.49)    | 3923458.5<br>(3673357.79,41799<br>67.07)    | 4800196.66<br>(4435390.37,519066<br>5.95)    | 7436252.16<br>(6981455.37,792046<br>0.3)     |

|                          |                                       |                                          |                                          |                                          |                                          |                                          |                                          |                                       |
|--------------------------|---------------------------------------|------------------------------------------|------------------------------------------|------------------------------------------|------------------------------------------|------------------------------------------|------------------------------------------|---------------------------------------|
| Central African Republic | 1084.84<br>(787.31,1425.02)           | 27.02<br>(16.05,39.73)                   | 80.61<br>(49.82,121.59)                  | 115.39<br>(78.5,159.45)                  | 160.22<br>(113.99,214.03)                | 210.44<br>(154.57,275.44)                | 222.04<br>(163.72,284.78)                | 269.11<br>(210.66,330.01)             |
| Chad                     | 6680.12<br>(4688.6,9059.63)           | 277.89<br>(167.73,410)                   | 714.69<br>(444.83,1077.21)               | 922.99<br>(620.26,1293.12)               | 1093.67<br>(766.09,1488.79)              | 1239.09<br>(894.28,1649.18)              | 1145.51<br>(831.59,1486.48)              | 1286.29<br>(963.81,1654.85)           |
| Chile                    | 2831165.29<br>(2055095.1,3741642.01)  | 31593.6<br>(19883.34,45631.44)           | 120002.57<br>(75298.24,178413.33)        | 232967.01<br>(157391.16,322055.64)       | 365113.99<br>(255880.15,512569.55)       | 507882.6<br>(371520.54,680076.23)        | 603504.14<br>(430028.29,786773.47)       | 970101.38<br>(745093.38,1216122.35)   |
| China                    | 3940837871<br>(2985712907,5014792764) | 35323328.86<br>(23133047.57,50899655.17) | 129860574.1<br>(85923839.73,184631804.3) | 267651524.4<br>(188923257.1,356275256.9) | 576839941.1<br>(426518798.7,770228155.7) | 742467192.1<br>(563799268.8,956819121.8) | 781276770.5<br>(602001416.3,964783886.5) | 1407418540<br>(1095413279,1731154883) |
| Colombia                 | 6910368.81<br>(5133903.49,8932436.46) | 67439.92<br>(41599.18,101219.51)         | 289932.87<br>(185659.01,431847.23)       | 575128.08<br>(392967.16,781755.68)       | 876585.71<br>(624357.14,1195819.99)      | 1338454.13<br>(992645.88,1754257.68)     | 1590788.05<br>(1187916.9,2021098.5)      | 2172040.06<br>(1708758.23,2646437.85) |
| Comoros                  | 58.2 (40.74,79.8)                     | 1.24 (0.75,1.83)                         | 3.91 (2.4,6.02)                          | 6.16 (4.06,8.72)                         | 8.34 (5.73,11.75)                        | 10.67 (7.64,14.56)                       | 11.74 (8.25,15.69)                       | 16.14 (11.91,21.24)                   |
| Congo                    | 2842.63<br>(2039.73,3868.84)          | 46.39<br>(27.75,69.31)                   | 141.82<br>(88.34,214.36)                 | 238.5<br>(150.69,337.14)                 | 371.47<br>(249.47,527.83)                | 566.55<br>(408.44,767.79)                | 657.46 (470.96,880)                      | 820.45<br>(644.07,1072.42)            |
| Cook Islands             | 0.23 (0.17,0.3)                       | 0.01 (0,0.01)                            | 0.02 (0.01,0.03)                         | 0.03 (0.02,0.04)                         | 0.03 (0.02,0.04)                         | 0.04 (0.03,0.05)                         | 0.05 (0.03,0.06)                         | 0.06 (0.05,0.08)                      |
| Costa Rica               | 128498.44<br>(92911.57,171605.07)     | 915.57<br>(546.47,1360.71)               | 3970.68<br>(2493.37,5860.68)             | 8410.5<br>(5682.38,11779.4)              | 15156.23<br>(10564.43,21809.29)          | 24868.01<br>(17667.27,33418.27)          | 30978.31<br>(21598.7,41639.77)           | 44199.14<br>(34358.94,55736.96)       |
| Croatia                  | 70833.32<br>(49681.78,93166.51)       | 572.18<br>(355.59,837.37)                | 2334.67<br>(1420.46,3468.39)             | 8168.65<br>(5467.2,11191.65)             | 7001.98<br>(4704.61,9860.94)             | 12061<br>(8436.4,16217.94)               | 16498.86<br>(11394.42,21942.58)          | 28139.59<br>(20616.17,34951.9)        |
| Cuba                     | 778688.66<br>(576674.74,1016741.45)   | 6991.44<br>(4369.3,10330.83)             | 30059.05<br>(19151.94,45192.87)          | 4225.03<br>(2754.12,5887.4)              | 102709.37<br>(71897.3,141265.3)          | 134466.95<br>(101090.36,179368.14)       | 145475.68<br>(107393.34,186979.95)       | 303774.02<br>(234774.92,378066.08)    |
| Cyprus                   | 10336.69<br>(7371.1,13738.44)         | 77.9 (49.5,109.23)                       | 312.24<br>(197.21,448.97)                | 55212.16<br>(37997.58,75538.2)           | 1267.96<br>(900.97,1797.63)              | 2079.19<br>(1519.66,2736.53)             | 2484.4<br>(1734.09,3300.42)              | 3427.85<br>(2504.8,4386.75)           |

|                                       |                                        |                                   |                                     |                                      |                                       |                                      |                                       |                                      |
|---------------------------------------|----------------------------------------|-----------------------------------|-------------------------------------|--------------------------------------|---------------------------------------|--------------------------------------|---------------------------------------|--------------------------------------|
|                                       |                                        |                                   |                                     | 8)                                   |                                       |                                      |                                       |                                      |
| Czechia                               | 765433.96<br>(576907.45,974307.2)      | 8114.86<br>(5483.74,11228.58)     | 26268.38<br>(17436.13,37392.9)      | 687.15<br>(464.87,958.91)            | 88525.03<br>(62945.14,115249.43)      | 129237.53<br>(96724.8,166214.23)     | 178782.83<br>(134799.32,224295.71)    | 283403.49<br>(223958.68,352236.34)   |
| Côte d'Ivoire                         | 62123.09<br>(43477.24,83436.6)         | 1840.62<br>(1160.5,2659.42)       | 5477<br>(3408.37,7997.33)           | 51101.84<br>(35559.65,67690)         | 10939.82<br>(7538.62,15037.46)        | 12809.89<br>(9170.32,16890.32)       | 11184.05<br>(8092.64,14440.74)        | 11703.07<br>(8639.59,15219.68)       |
| Democratic People's Republic of Korea | 37957.15<br>(27546.99,50977.76)        | 399.31<br>(246.72,580.97)         | 1447.87<br>(910.77,2135.12)         | 2729.52<br>(1825.81,3877.94)         | 4094.27<br>(2862.34,6048.52)          | 6310.6<br>(4580.87,8745.87)          | 8159.45<br>(5769.3,10873.6)           | 14816.13<br>(11351.18,18715.74)      |
| Democratic Republic of the Congo      | 190407.18<br>(135445.63,255309.91)     | 5029.78<br>(2994.14,7493.72)      | 14486.61<br>(8899.11,22065.52)      | 21553.89<br>(14036.53,29818.93)      | 28840.35<br>(20137.13,39607.94)       | 36674.16<br>(26662.94,48436.73)      | 37412.22<br>(27347.17,48912.04)       | 46410.18<br>(35368.62,58975.02)      |
| Denmark                               | 411077.98<br>(299620.82,547440.42)     | 5449.29<br>(3511.87,7531.13)      | 19060.17<br>(12220.04,27752.79)     | 33767.45<br>(23700.76,47064.15)      | 45776.47<br>(32826.71,64926.77)       | 61472.64<br>(45623.8,83038.52)       | 86186.79<br>(61960.37,113394.26)      | 159365.16<br>(119777.27,203732.8)    |
| Djibouti                              | 71.55 (49.69,96.78)                    | 1.21 (0.72,1.83)                  | 4.03 (2.45,6.2)                     | 6.69 (4.4,9.36)                      | 11.08 (7.63,15.43)                    | 15.04 (10.72,20.2)                   | 15.52 (10.76,20.44)                   | 17.97 (13.01,23.32)                  |
| Dominica                              | 2.98 (2.24,3.88)                       | 0.06 (0.04,0.09)                  | 0.2 (0.13,0.3)                      | 0.32 (0.22,0.44)                     | 0.47 (0.34,0.61)                      | 0.6 (0.46,0.77)                      | 0.56 (0.43,0.71)                      | 0.77 (0.61,0.96)                     |
| Dominican Republic                    | 115572.33<br>(85902.88,153160.63)      | 2585.37<br>(1714.65,3638.23)      | 9130.77<br>(6054.39,12850.08)       | 14388.66<br>(10184.74,19280.04)      | 18613.29<br>(13532.43,25302.83)       | 22038.25<br>(16786.72,29450.04)      | 21994.01<br>(16892.89,28324.14)       | 26821.99<br>(20737.06,34315.27)      |
| Ecuador                               | 742269.48<br>(553229.38,956118.63)     | 11224.86<br>(7290.66,16412.29)    | 44870.72<br>(29699.35,66665.19)     | 75467.28<br>(53590,100974.87)        | 103942.79<br>(74934.53,136271.94)     | 143130.68<br>(109705.53,183421.25)   | 156908.67<br>(118480.58,199085.05)    | 206724.49<br>(159528.73,253288.06)   |
| Egypt                                 | 9126981.48<br>(6891282.34,11676257.89) | 248144.86<br>(162964.42,345903.7) | 834712.61<br>(554043.62,1162809.48) | 1239074.96<br>(874848.17,1632520.49) | 1570008.13<br>(1152072.65,2019360.19) | 1886675.18<br>(1465727.18,2416534.1) | 1649922.66<br>(1305406.09,2038173.77) | 1698443.08<br>(1376220.2,2060956.17) |
| El Salvador                           | 47788.85<br>(36193.97,61470.21)        | 743.14<br>(472.13,1090.27)        | 2999.2<br>(1938.81,4377.21)         | 5295.96<br>(3716.95,7060.89)         | 6767.02<br>(4909.99,8909.61)          | 8670.08<br>(6643.2,11011.36)         | 10222.98<br>(8004.08,12826.29)        | 13090.47<br>(10508.8,16194.58)       |

|                   |                                         |                                    |                                      |                                      |                                      |                                    |                                       |                                         |
|-------------------|-----------------------------------------|------------------------------------|--------------------------------------|--------------------------------------|--------------------------------------|------------------------------------|---------------------------------------|-----------------------------------------|
|                   | )                                       |                                    |                                      |                                      |                                      |                                    |                                       |                                         |
| Equatorial Guinea | 996.51<br>(712.46,1341.21)              | 21.74<br>(12.98,32.94)             | 68.82<br>(41.91,103.89)              | 110.18<br>(74.38,154.46)             | 156.63<br>(109.38,220.64)            | 202.56<br>(148.2,269.96)           | 200.8<br>(143.53,262.33)              | 235.78 (182.1,297)                      |
| Eritrea           | 893.2<br>(616.21,1231.72)               | 20.63 (11.85,31.5)                 | 63.13 (37.22,97.07)                  | 97.2 (63.8,139.81)                   | 131.41<br>(90.85,188.89)             | 169.97<br>(120.48,232.72)          | 179.32<br>(125.06,237.35)             | 231.54<br>(166.95,304.38)               |
| Estonia           | 13951.3<br>(10278.98,18743.77)          | 59.4 (36.41,89.69)                 | 221.28<br>(138.98,330.47)            | 526.69<br>(357.92,736.93)            | 1247.78<br>(870.09,1751.21)          | 2349.76<br>(1705.12,3185.33)       | 3479.02<br>(2429.42,4881.29)          | 6067.38<br>(4741.04,7768.85)            |
| Eswatini          | 1180.98<br>(876.3,1554.49)              | 21.26<br>(12.73,32.88)             | 78.21<br>(49.26,117.63)              | 146.12<br>(101.68,195.06)            | 217.23<br>(153.32,294.71)            | 260.37<br>(196.35,344.97)          | 224.79<br>(175.99,283.75)             | 233 (186.98,285.49)                     |
| Ethiopia          | 361689.93<br>(252422.14,497955.45)      | 10634.18<br>(6214.46,16103.13)     | 31886.21<br>(18979.68,48830.81)      | 46014.55<br>(30260.88,64395.89)      | 57609.53<br>(40316.27,82495.19)      | 70727.28<br>(51116.9,97757.6)      | 69245.15<br>(49764.93,90818.59)       | 75573.02<br>(55769.03,97554.23)         |
| Fiji              | 207.88<br>(152.32,275.94)               | 5.95 (3.82,8.33)                   | 17.72 (11.59,25)                     | 26.21 (18.08,35.44)                  | 32.96 (23.71,44.7)                   | 41.53 (31.2,55.61)                 | 39.63 (30.12,51.02)                   | 43.89 (33.81,55.85)                     |
| Finland           | 361396.03<br>(267698.83,478679.31)      | 4280.57<br>(2830.82,5945.98)       | 14257.12<br>(9482.71,20574.79)       | 27074.54<br>(18830.29,37595.12)      | 42025.51<br>(30180.83,59819.55)      | 64100.48<br>(47463.97,86001.05)    | 81095.24<br>(59032.61,106754.33)      | 128562.57<br>(99877.6,161988.49)        |
| France            | 34973166.82<br>(25719601.24,45658280.9) | 528359.46<br>(341931.62,749039.36) | 1640052.59<br>(1075692.87,2345971.3) | 2582002.9<br>(1821264.29,3492190.46) | 4078501.06<br>(2956943.09,5428308.1) | 6173536.6<br>(4575967.2,7964238.3) | 7534746.76<br>(5513306.92,9769514.73) | 12435967.44<br>(9434495.27,15909018.65) |
| Gabon             | 1875.53<br>(1322.69,2520.37)            | 37.37 (22.3,54.73)                 | 120.96<br>(73.61,181.18)             | 194.7<br>(127.5,272.63)              | 268.39<br>(181.92,382.46)            | 353.35<br>(253.96,469.18)          | 387.21<br>(273.75,504.68)             | 513.55<br>(389.65,655.5)                |
| Gambia            | 370.9 (260.4,500.3)                     | 12.83 (7.92,18.66)                 | 37.42 (23.26,54.53)                  | 51.87 (35.25,70.76)                  | 63.39 (43.7,87.28)                   | 72.26 (52.04,96.43)                | 64.86 (47,84.63)                      | 68.27 (51.24,88.01)                     |
| Georgia           | 14354.18<br>(10839.05,18534.67)         | 176.56<br>(110.91,256.66)          | 649.54<br>(416.83,944.12)            | 1256.18<br>(884.74,1727.91)          | 2188.76<br>(1593.08,2910.14)         | 2938.25<br>(2238.24,3812.21)       | 3078.99<br>(2383.62,3848.26)          | 4065.91<br>(3211.63,5035.37)            |
| Germany           | 90469701.17<br>(64993577.54,12064)      | 1151898.8<br>(742481,1604518.      | 4349191.44<br>(2804083.76,61649      | 7625050.56<br>(5138427.92,10421      | 12627441.67<br>(8952783.12,17267     | 17207290.37<br>(12595142.2,23451   | 19827439.97<br>(14360967.18,25870     | 27681388.35<br>(20399692.37,35859       |

|               |                                    |                              |                                |                                 |                                 |                                   |                                    |                                    |
|---------------|------------------------------------|------------------------------|--------------------------------|---------------------------------|---------------------------------|-----------------------------------|------------------------------------|------------------------------------|
|               | 0732.8)                            | 63)                          | 69.02)                         | 398.35)                         | 856.85)                         | 718.26)                           | 975.99)                            | 295.68)                            |
| Ghana         | 127596<br>(91628.67,171795.16)     | 3450.78<br>(2153.66,4998.84) | 11093.55<br>(6936.7,16314.86)  | 17069.17<br>(11600.48,23624.27) | 21590.78<br>(15486.37,29596.88) | 25170.96<br>(18749.98,33613.14)   | 23308.06<br>(17354.08,30158.65)    | 25912.71<br>(19347.4,33488.54)     |
| Greece        | 557987.85<br>(432987.45,699222.09) | 6986.95<br>(4711,9461.69)    | 23177.48<br>(15940.9,32267.99) | 37870.84<br>(27514.5,48843.65)  | 60323<br>(45679.91,76572.83)    | 100547.17<br>(78638.06,126460.88) | 134880.73<br>(105479.52,168026.74) | 194201.68<br>(155023.56,237588.3)  |
| Greenland     | 20 (15.02,25.99)                   | 0.58 (0.39,0.82)             | 1.51 (1.02,2.08)               | 2.41 (1.71,3.25)                | 3.4 (2.5,4.51)                  | 4.05 (3.07,5.23)                  | 3.61 (2.78,4.56)                   | 4.45 (3.54,5.53)                   |
| Grenada       | 9.72 (7.12,12.69)                  | 0.18 (0.11,0.25)             | 0.7 (0.45,1.01)                | 1.13 (0.79,1.54)                | 1.4 (1,1.86)                    | 1.65 (1.21,2.13)                  | 1.83 (1.37,2.31)                   | 2.84 (2.19,3.58)                   |
| Guam          | 15.99 (11.44,21.04)                | 0.36 (0.23,0.5)              | 1.15 (0.72,1.63)               | 1.81 (1.23,2.42)                | 2.22 (1.57,3.02)                | 2.82 (2.04,3.75)                  | 3.02 (2.2,3.86)                    | 4.61 (3.44,5.85)                   |
| Guatemala     | 254186.25<br>(191348.35,330805.46) | 4118.5<br>(2593.93,6232.79)  | 15460.91<br>(9898.83,23207.05) | 25832.65<br>(17553.79,35215.48) | 36198.67<br>(25361.33,48668.74) | 49568.61<br>(37614.62,63910.15)   | 56492.09<br>(44236.6,71216.49)     | 66514.82<br>(54089.25,82354.77)    |
| Guinea        | 9001.81<br>(6327.21,12104)         | 304.53<br>(187.8,446.97)     | 856.75<br>(535.81,1264.97)     | 45.49 (30.7,63.72)              | 1585.62<br>(1093.86,2142.2)     | 1760.77<br>(1276.71,2351.28)      | 1557.23<br>(1136.78,2030.03)       | 1697.66<br>(1267.27,2182.82)       |
| Guinea-Bissau | 335.68<br>(235.07,455.06)          | 10.64 (6.51,15.63)           | 30.32 (19.06,44.91)            | 1239.25<br>(828.99,1685.71)     | 59.44 (41.1,81.68)              | 68.2 (48.94,91.55)                | 59.68 (43.14,78.18)                | 61.91 (45.63,79.39)                |
| Guyana        | 371.3<br>(279.55,480.9)            | 8.44 (5.5,11.78)             | 32 (21.03,45.71)               | 50.44 (35.87,67.76)             | 54.97 (40.45,72.29)             | 64.43 (49.64,83.06)               | 72.02 (56.15,90.17)                | 88.99 (70.92,110.12)               |
| Haiti         | 22021.32<br>(16539.01,28574.52)    | 439.26<br>(278.21,653.83)    | 1405.68<br>(890.42,2145.61)    | 2331.44<br>(1607.65,3186.84)    | 3515.38<br>(2547.15,4735.45)    | 4669.33<br>(3576.76,5987.35)      | 4596.71<br>(3573.76,5686.76)       | 5063.52<br>(4065.06,6178.69)       |
| Honduras      | 142717.92<br>(111888.21,178625.21) | 1402.09<br>(860.03,2119.53)  | 5623.53<br>(3632.92,8238.01)   | 11067.75<br>(7616.98,15193.68)  | 17827.68<br>(12426.48,24650.23) | 28092.23<br>(22083.45,35499.85)   | 34902.94<br>(28274.27,41936.01)    | 43801.69<br>(36994.09,50987.89)    |
| Hungary       | 419152.24<br>(316942.24,540225.68) | 2975.64<br>(1908.81,4247.5)  | 10766.98<br>(6980.02,15452.24) | 21816.07<br>(15305.42,29679.81) | 36050.57<br>(26037.16,50467.28) | 59926.01<br>(44481.34,80063.19)   | 102926.14<br>(75677.67,131824.93)  | 184690.82<br>(146551.82,228490.73) |
| Iceland       | 1466.04                            | 22.3 (14.2,31.72)            | 78.18                          | 140.33                          | 194.45                          | 262.18                            | 311.77                             | 456.84                             |

|                            |                                              |                                             |                                              |                                              |                                              |                                              |                                              |                                              |
|----------------------------|----------------------------------------------|---------------------------------------------|----------------------------------------------|----------------------------------------------|----------------------------------------------|----------------------------------------------|----------------------------------------------|----------------------------------------------|
|                            | (1051.72,1956.91)                            |                                             | (49.61,114.61)                               | (93.55,192.83)                               | (138.3,264.6)                                | (189.04,349.55)                              | (224.31,410.73)                              | (342.7,592.87)                               |
| India                      | 727306443.3<br>(533394813.7,97021<br>3122.7) | 13782709.87<br>(9017529.77,1970<br>5951.19) | 50883532.51<br>(32582234.74,7308<br>7810.02) | 81187706.67<br>(57426446.24,1103<br>54360.6) | 110801260.6<br>(81530228.87,1523<br>03581.8) | 142787596<br>(107581946,192790<br>936.2)     | 143887726.2<br>(107029995.6,18667<br>4543.2) | 183975911.4<br>(138226432.5,23529<br>5939.7) |
| Indonesia                  | 9053691.62<br>(6244810.31,124073<br>44.6)    | 168059.43<br>(91390.56,257706.<br>93)       | 560713.3<br>(330603.81,879205.<br>66)        | 902886.9<br>(569773.17,129512<br>7.21)       | 1279942.57<br>(842046.97,181031<br>1.23)     | 1712849.21<br>(1219570.87,23460<br>73.04)    | 1920060.29<br>(1381737.8,2533817<br>.69)     | 2509179.91<br>(1809687.12,328510<br>2.84)    |
| Iran (Islamic Republic of) | 10200652.27<br>(7727987.2,1298832<br>9.58)   | 157573.27<br>(104881.9,216844.<br>71)       | 539086.12<br>(365046.15,764941.<br>22)       | 985384.68<br>(711431.85,130790<br>4.49)      | 1771572.04<br>(1313168.41,22950<br>58.49)    | 2488946.41<br>(1892976.33,31448<br>43.39)    | 2127238.57<br>(1649924.47,265109<br>6.82)    | 2130851.18<br>(1690558.09,260764<br>0.45)    |
| Iraq                       | 1014526.04<br>(751996.51,1302502<br>.54)     | 29760.34<br>(20068.02,41397.1<br>3)         | 96194<br>(63670.04,136182.3<br>6)            | 141906.6<br>(100981.29,187442<br>.92)        | 173431.13<br>(126368.89,221199.<br>26)       | 184013.78<br>(138766.97,235662.<br>63)       | 179263.8<br>(137735.63,223817.<br>29)        | 209956.39<br>(164405.66,256800.9<br>6)       |
| Ireland                    | 543835.34<br>(388668.96,735143.<br>66)       | 6074.68<br>(3844.34,8692.91)                | 19031.86<br>(12146.13,27760.24<br>)          | 29749.5<br>(20231.23,41829.4<br>8)           | 50783.04<br>(35497.47,71720.43<br>)          | 95208.07<br>(68512.12,129273.7<br>4)         | 132245.28<br>(93320.26,181792.5<br>6)        | 210742.91<br>(155117.4,274074.3)             |
| Israel                     | 484891.73<br>(356418.4,634166.0<br>2)        | 10438.18<br>(6821.76,14411.97<br>)          | 31180.52<br>(20135.72,43950.28<br>)          | 45730.16<br>(31122.76,62255.5<br>8)          | 63453.94<br>(45566.77,85459.14<br>)          | 89783.9<br>(66951,117638.75)                 | 101564.79<br>(76804.68,129324.9<br>3)        | 142740.25<br>(109015.7,181125.37<br>)        |
| Italy                      | 24824455.15<br>(18173431.44,33079<br>421.84) | 242355.6<br>(154566.62,34629<br>9.38)       | 875390.14<br>(562410.7,1254314.<br>49)       | 1560143.83<br>(1075701.74,21470<br>14.26)    | 2498994.89<br>(1801846.88,34740<br>90.71)    | 3918261.12<br>(2918549.32,53798<br>44.39)    | 5535369.29<br>(4033948.5,7312117<br>.29)     | 10193940.27<br>(7626407.67,131657<br>41.33)  |
| Jamaica                    | 7821.7<br>(5720.2,10156.64)                  | 122.29<br>(76.73,179.74)                    | 493.33<br>(312.74,731.58)                    | 880.99<br>(592.88,1194.34)                   | 1197.33<br>(844.86,1608.13)                  | 1560.94<br>(1149.88,2026.17)                 | 1529.09<br>(1151.87,1927.45)                 | 2037.71<br>(1591.24,2489.24)                 |
| Japan                      | 169003753.2<br>(122357418.5,22252<br>2547.5) | 1347414.04<br>(847318.32,19450<br>01.47)    | 5233985.91<br>(3299148.86,76056<br>50.17)    | 9325839.63<br>(6423557.1,129736<br>28.59)    | 15265052.26<br>(11064640.02,2146<br>7934.06) | 26499072.85<br>(19381342.54,3597<br>4348.15) | 37996659.73<br>(26938949.68,49843<br>546.89) | 73335728.74<br>(54402461.94,92712<br>438.13) |
| Jordan                     | 150702<br>(114792.14,192847.                 | 4756.59<br>(3271.35,6547.6)                 | 14870.85<br>(10175.51,20980.56)              | 20662.3<br>(15213.84,27157.1)                | 23974.57<br>(18100.81,30633.33)              | 29132.19<br>(22411.85,37080.17)              | 27314.63<br>(21486.02,33796.63)              | 29990.88<br>(24132.77,36652.35)              |

|                                  |                                    |                               |                                 |                                 |                                 |                                 |                                 |                                  |
|----------------------------------|------------------------------------|-------------------------------|---------------------------------|---------------------------------|---------------------------------|---------------------------------|---------------------------------|----------------------------------|
|                                  | 81)                                |                               | )                               | 8)                              | )                               | )                               |                                 |                                  |
| Kazakhstan                       | 354132.82<br>(261801.22,466369.38) | 5439.05<br>(3457.2,7927.93)   | 17487.77<br>(11305.13,26113.39) | 36658.49<br>(25531.3,50364.44)  | 60788.79<br>(43830.36,82042.81) | 72454.76<br>(54938.46,94822.3)  | 71153.12<br>(53540.49,90584.13) | 90150.84<br>(69198.28,114514.37) |
| Kenya                            | 276385.27<br>(193008.72,378905.69) | 7725.72<br>(4530.96,11594.22) | 23367.87<br>(14151.24,35350.32) | 34117.35<br>(22569.12,47808.51) | 44371.92<br>(30875.43,62650.31) | 54718.12<br>(39188.85,75292.45) | 51597.46<br>(37165.18,67923.51) | 60486.84<br>(44527.95,78286.36)  |
| Kiribati                         | 1.62 (1.2,2.12)                    | 0.05 (0.03,0.07)              | 0.16 (0.11,0.22)                | 0.23 (0.17,0.31)                | 0.28 (0.2,0.37)                 | 0.31 (0.24,0.41)                | 0.29 (0.22,0.37)                | 0.3 (0.23,0.37)                  |
| Kuwait                           | 332161.59<br>(262590.12,406060.22) | 3543.45<br>(2447.34,4781.58)  | 16283.66<br>(11088.03,22031.56) | 36443.21<br>(27220.49,46427.83) | 64793.81<br>(50000.16,80094.57) | 82608.74<br>(65824.24,100672.1) | 65715.08<br>(53714.92,78214.88) | 62773.64<br>(52294.93,73837.69)  |
| Kyrgyzstan                       | 51468.07<br>(39101.8,66733.29)     | 465.85<br>(291.16,735.49)     | 1944.55<br>(1261.33,2946.9)     | 4671.9<br>(3238.06,6240.42)     | 8420.52<br>(5817.49,11920.35)   | 10611.47<br>(8143.78,13896.2)   | 10873.37<br>(8516.34,13411.42)  | 14480.4<br>(11833.64,17582.5)    |
| Lao People's Democratic Republic | 5313.47<br>(3681.76,7177.05)       | 115.95<br>(69.28,170.31)      | 377.32<br>(229.35,567.84)       | 604.37<br>(388.97,851.01)       | 826.53<br>(559.8,1134.42)       | 1023.96<br>(732.78,1368.75)     | 1033.38<br>(728.57,1351.25)     | 1331.96<br>(973.02,1733.48)      |
| Latvia                           | 19659.83<br>(14506.69,25327.21)    | 81.71<br>(50.27,123.67)       | 279.84<br>(174.94,432.38)       | 707.66<br>(459.86,1022.87)      | 1671.87<br>(1152.82,2435.05)    | 3299.16<br>(2386.73,4424.87)    | 4902.62<br>(3478.27,6286.06)    | 8716.98<br>(6803.79,10602.31)    |
| Lebanon                          | 107440.25<br>(83303.86,134369.76)  | 1843.35<br>(1272.72,2561.23)  | 6420.75<br>(4469.06,8984.25)    | 14679.08<br>(10765.17,19351.76) | 21306.77<br>(16082.58,26724.49) | 22686.52<br>(17656.69,28124.4)  | 19491.29<br>(15723.01,23630.82) | 21012.49<br>(17334.63,24992.81)  |
| Lesotho                          | 1729.42<br>(1295.21,2210.42)       | 34.37<br>(20.62,50.86)        | 122.59<br>(78.13,180.37)        | 212.48<br>(151.62,279.41)       | 297.2<br>(217.53,389.41)        | 360.08<br>(271.2,459.74)        | 341.95<br>(264.22,418.05)       | 360.76<br>(291.88,432.59)        |
| Liberia                          | 2732.16<br>(1915.92,3708.45)       | 86.08<br>(54.46,125.25)       | 240.72<br>(149.44,357.66)       | 336.72<br>(224.79,464.66)       | 413.1<br>(285.43,568.08)        | 552.44<br>(397.21,738.05)       | 516.34<br>(371.94,682.39)       | 586.75<br>(432.65,772.35)        |
| Libya                            | 80945.26<br>(62254.24,103333.2)    | 1731.2<br>(1198.76,2414.23)   | 5940.71<br>(4076.49,8394.45)    | 9268.38<br>(6719.61,12206.03)   | 12500.46<br>(9361.9,16374.59)   | 16627.5<br>(12868.26,21271.36)  | 16242.46<br>(12807.62,20058.32) | 18634.55<br>(15221.61,22614.22)  |

|                  |                                        |                                |                                  |                                  |                                   |                                   |                                    |                                   |
|------------------|----------------------------------------|--------------------------------|----------------------------------|----------------------------------|-----------------------------------|-----------------------------------|------------------------------------|-----------------------------------|
| Lithuania        | 64245.53<br>(48741.59,83712.59)<br>)   | 325.41<br>(203.56,500.9)       | 1484.08<br>(929.09,2216.32)      | 3391.31<br>(2236.42,4802.3)      | 6111.44<br>(4104.05,8937.98)      | 10311.06<br>(7698.47,13724.36)    | 15049.89<br>(11195.85,19838.29)    | 27572.34<br>(22374.14,33692.44)   |
| Luxembourg       | 6260.14<br>(4545.13,8256.51)           | 70.81 (44.89,97.8)             | 269.08<br>(175.29,389.84)        | 530.31<br>(364.59,726.81)        | 836.34<br>(593.71,1131.07)        | 1179.83<br>(861.25,1538.73)       | 1382.28<br>(1007.27,1807.82)       | 1991.49<br>(1498.14,2564.44)      |
| Madagascar       | 23681.93<br>(16349.33,32439.73)<br>)   | 674.16<br>(393.28,1021.41)     | 1960.36<br>(1155.8,3031.01)      | 2810.19<br>(1793.58,4002.78)     | 3561.05<br>(2451.03,5050.68)      | 4395.31<br>(3094.37,6013.36)      | 4534.31<br>(3162.15,5985.66)       | 5746.56<br>(4299.11,7334.82)      |
| Malawi           | 20798.87<br>(14413.45,28657.83)<br>)   | 729.43<br>(435.98,1073.54)     | 1976.06<br>(1192.05,3003.05)     | 2545.36<br>(1624.22,3573.74)     | 3338.23<br>(2300.79,4782.32)      | 4050.91<br>(2922.58,5515.98)      | 3898.37<br>(2771.41,5128.59)       | 4260.5<br>(3166.42,5580.61)       |
| Malaysia         | 465465.16<br>(320543.23,640960.5)<br>) | 8869.05<br>(5046.07,13483.68)  | 30755.09<br>(17864.39,47830)     | 50950.79<br>(33527.45,73395.31)  | 71074<br>(47749.57,100770.26)     | 91861.21<br>(64987.27,126401.41)  | 92618.89<br>(64408.17,122368.53)   | 119336.13<br>(86960.32,156711.3)  |
| Maldives         | 498.91<br>(341.61,700.81)              | 5.22 (3.09,7.88)               | 18.56 (10.99,29.18)              | 40.01 (25.32,57.37)              | 73.18<br>(49.34,105.02)           | 109.06<br>(75.06,150.73)          | 112.2 (75.28,159.95)               | 140.67<br>(102.53,190.67)         |
| Mali             | 16666.38<br>(11729.55,22667.02)<br>)   | 658.65<br>(403.63,971.48)      | 1803.4<br>(1150.3,2656.46)       | 2384.15<br>(1614.64,3318.7)      | 2774.22<br>(1924.52,3874.77)      | 3098.2<br>(2242.99,4171.72)       | 2842.9<br>(2088.63,3708.86)        | 3104.86<br>(2304.84,3965.01)      |
| Malta            | 1976.3<br>(1427.04,2632.64)            | 22.75<br>(14.57,31.99)         | 85.79<br>(55.05,124.05)          | 162.86<br>(109.03,222.63)        | 263.67<br>(182.54,366.8)          | 369.78<br>(270.76,502.82)         | 437.65<br>(319.66,574.91)          | 633.79<br>(475.42,809.44)         |
| Marshall Islands | 1.12 (0.81,1.47)                       | 0.03 (0.02,0.04)               | 0.08 (0.05,0.12)                 | 0.12 (0.08,0.16)                 | 0.16 (0.11,0.22)                  | 0.22 (0.16,0.29)                  | 0.23 (0.17,0.3)                    | 0.27 (0.21,0.34)                  |
| Mauritania       | 2272.12<br>(1589.37,3068.2)            | 75.5<br>(46.55,109.69)         | 213.62<br>(133.57,318.38)        | 297.81<br>(199.11,412.91)        | 364.12<br>(251.25,498.48)         | 426.14<br>(308.75,572.69)         | 412.37 (295,534.38)                | 482.55<br>(355.14,621.67)         |
| Mauritius        | 1790.51<br>(1219.29,2494.42)           | 24.78<br>(14.91,36.84)         | 86.07<br>(52.15,132.37)          | 151.85<br>(96.27,217.06)         | 209.2 (140.72,302)                | 301.81<br>(210.81,413.71)         | 433.92<br>(296.17,601.54)          | 582.89<br>(408.26,790.89)         |
| Mexico           | 89792941.74<br>(70263661.45,11130)     | 687795.04<br>(433636.49,10304) | 2894825.16<br>(1920213.42,41814) | 6203799.54<br>(4431314.32,82089) | 10910861.95<br>(7998268.92,14485) | 17530382.41<br>(13873425.45,2187) | 21420612.33<br>(17134008.81,25823) | 30144665.3<br>(24472794.05,35701) |

|                                        |                                          |                                     |                                        |                                        |                                        |                                        |                                        |                                          |
|----------------------------------------|------------------------------------------|-------------------------------------|----------------------------------------|----------------------------------------|----------------------------------------|----------------------------------------|----------------------------------------|------------------------------------------|
|                                        | 9186.9)                                  | 43.61)                              | 58.61)                                 | 42)                                    | 290.46)                                | 8062.45)                               | 322.56)                                | 667.27)                                  |
| Micronesia<br>(Federated<br>States of) | 1.06 (0.76,1.4)                          | 0.03 (0.02,0.04)                    | 0.09 (0.06,0.14)                       | 0.13 (0.09,0.18)                       | 0.16 (0.11,0.21)                       | 0.19 (0.14,0.25)                       | 0.2 (0.14,0.25)                        | 0.27 (0.2,0.33)                          |
| Monaco                                 | 6.7 (5.12,8.61)                          | 0.11 (0.07,0.15)                    | 0.36 (0.24,0.51)                       | 0.55 (0.39,0.74)                       | 0.81 (0.6,1.08)                        | 1.17 (0.89,1.51)                       | 1.52 (1.19,1.93)                       | 2.18 (1.74,2.69)                         |
| Mongolia                               | 10875.74<br>(8118.58,14058.43)           | 127.45<br>(79.98,189.81)            | 483.04<br>(306.78,721.91)              | 969.15<br>(669.93,1317.45)             | 1761.01<br>(1258.89,2343.47)           | 2221.09<br>(1655.32,2878.47)           | 2317.02<br>(1774.93,2911.73)           | 2996.98<br>(2372.75,3695.59)             |
| Montenegro                             | 864.49<br>(641.76,1124.62)               | 12.19 (7.92,17.39)                  | 43.47 (28.47,62.35)                    | 71.55 (49.18,98.18)                    | 105.69<br>(75.07,140.01)               | 162.83<br>(122.05,210.53)              | 193.78<br>(145.99,246.94)              | 274.97<br>(213.08,349.21)                |
| Morocco                                | 752753.59<br>(574034.05,960418.<br>84)   | 17551.47<br>(11977.63,24190.2<br>5) | 58935.88<br>(40476.73,82826.04<br>)    | 92207.28<br>(66757.87,122436.<br>73)   | 123098.3<br>(91405.5,160350.49<br>)    | 149158.86<br>(113826.04,192379.<br>64) | 145275.28<br>(114711.25,177832.<br>01) | 166526.52<br>(134879.01,200403.6<br>8)   |
| Mozambique                             | 44420.01<br>(30780.87,61162.76<br>)      | 1503.75<br>(875.29,2251.39)         | 4326.24<br>(2620.08,6574)              | 5899.89<br>(3889.47,8315.77)           | 6660.94<br>(4651.36,9296.65)           | 8014.14<br>(5746.03,10967.69)          | 8038.17<br>(5696.3,10732.11)           | 9976.87<br>(7302.33,13025.16)            |
| Myanmar                                | 405957.99<br>(285468.54,549315.<br>84)   | 8193.28<br>(4982.95,12082.05<br>)   | 25916.67<br>(16063.18,40382.66<br>)    | 39030.95<br>(25368.44,55808.5<br>7)    | 53306.79<br>(36489.49,73613.55<br>)    | 73672.02<br>(52388.14,98495.98<br>)    | 85838.16<br>(60621.29,113051.0<br>4)   | 120000.13<br>(89555.04,155881.99<br>)    |
| Namibia                                | 6348.02<br>(4659.66,8326.77)             | 107.98<br>(65.6,160.95)             | 386.03<br>(245.12,569.07)              | 723.65<br>(510.2,975.25)               | 1071.11<br>(770.04,1440.71)            | 1309.65<br>(974.64,1708.87)            | 1262.24<br>(941.68,1613.64)            | 1487.36<br>(1152.38,1858.27)             |
| Nauru                                  | 0.09 (0.06,0.12)                         | 0 (0,0)                             | 0.01 (0,0.01)                          | 0.01 (0.01,0.02)                       | 0.01 (0.01,0.02)                       | 0.02 (0.01,0.02)                       | 0.02 (0.01,0.02)                       | 0.02 (0.02,0.03)                         |
| Nepal                                  | 282567.74<br>(206994.2,377600.1<br>4)    | 6485.46<br>(4186.16,9237.19)        | 23913.66<br>(15257.88,34272.32<br>)    | 36081.12<br>(25541.27,49466.0<br>2)    | 45428.69<br>(33342.78,62252.99<br>)    | 54395.6<br>(41315.26,73472.69<br>)     | 53142.98<br>(39981.15,68512.52)        | 63120.24<br>(47369.68,80386.42)          |
| Netherlands                            | 3596639.74<br>(2568944.3,4770318<br>.63) | 49697.25<br>(31572.27,69628.8<br>)  | 173764.57<br>(110747.22,246291.<br>87) | 294301.53<br>(199789.46,406762<br>.59) | 434224.29<br>(308751.74,619792.<br>14) | 599792.79<br>(435468.28,806529.<br>53) | 742116.76<br>(528198.41,968889.<br>57) | 1302742.55<br>(954416.93,1652424.<br>12) |
| New Zealand                            | 312252.19<br>(226559.12,417433.          | 3212.3<br>(2008,4612.03)            | 12797.76<br>(7994.92,18607.34)         | 25284.17<br>(17279.37,34613.1          | 41015.57<br>(29150.72,57823.5)         | 55289.04<br>(40828.09,75475.85         | 65252.66<br>(46986.31,86212.49)        | 109400.69<br>(82311.7,140089.01)         |

|                                | 4)                                           |                                       |                                          | 8)                                        |                                          | )                                      |                                           |                                           |
|--------------------------------|----------------------------------------------|---------------------------------------|------------------------------------------|-------------------------------------------|------------------------------------------|----------------------------------------|-------------------------------------------|-------------------------------------------|
| Nicaragua                      | 46825.54<br>(34951.02,60404.26<br>)          | 618.75<br>(394.72,903.99)             | 2369.32<br>(1526.49,3431.85)             | 4443.74<br>(3143.13,6075.67)              | 6822.03<br>(4965.08,9213.14)             | 9464.31<br>(7135.69,12198.56)          | 10301<br>(7754.13,12879.87)               | 12806.4<br>(10031.77,15701.18)            |
| Niger                          | 12613.75<br>(8813.88,17118.56)               | 578.82<br>(352.24,862.74)             | 1454.55<br>(909.29,2182.39)              | 1811.99<br>(1212.18,2509.56)              | 1936.61<br>(1335.18,2651.71)             | 2205.91<br>(1595.32,2949.16)           | 2165.76<br>(1575.49,2797.94)              | 2460.11<br>(1834.18,3165.06)              |
| Nigeria                        | 4233281.48<br>(3038474.98,561863<br>2.19)    | 155776.1<br>(96463.09,220763.<br>93)  | 434846.59<br>(274390.56,619751.<br>37)   | 589828.81<br>(400828.96,804432<br>.94)    | 685821.19<br>(488273.94,926761.<br>72)   | 777759.78<br>(577830.4,1026113.<br>44) | 727185.95<br>(546235.92,928021.<br>87)    | 862063.06<br>(654452.12,1092786.<br>92)   |
| Niue                           | 0 (0,0)                                      | 0 (0,0)                               | 0 (0,0)                                  | 0 (0,0)                                   | 0 (0,0)                                  | 0 (0,0)                                | 0 (0,0)                                   | 0 (0,0)                                   |
| North<br>Macedonia             | 6728.8<br>(4903.57,8807.87)                  | 77 (48.72,110.48)                     | 300.88<br>(190.49,437.89)                | 570.79<br>(387.95,787.37)                 | 887.86<br>(636.06,1192.94)               | 1280.44<br>(931.63,1672.56)            | 1508.1<br>(1110.56,1925.96)               | 2103.73<br>(1598.16,2680.67)              |
| Northern<br>Mariana<br>Islands | 0.98 (0.71,1.29)                             | 0.02 (0.01,0.03)                      | 0.06 (0.04,0.09)                         | 0.08 (0.05,0.11)                          | 0.12 (0.08,0.16)                         | 0.17 (0.12,0.23)                       | 0.14 (0.1,0.18)                           | 0.39 (0.29,0.49)                          |
| Norway                         | 446868.64<br>(322901.71,599021)              | 4655<br>(2936.49,6665.54)             | 18081.15<br>(11476.38,26069.2)           | 33725.72<br>(23375.27,46939.8)            | 54280.61<br>(38871.69,77168.98<br>)      | 76077.11<br>(55396.17,103403.6<br>1)   | 94064.71<br>(67450.85,124597.2<br>3)      | 165984.34<br>(123394.86,214176.6<br>4)    |
| Oman                           | 32413.14<br>(24581.18,41739.96<br>)          | 617.12<br>(417.39,863.28)             | 2120.39<br>(1453.2,2974.61)              | 4308.71<br>(3095.07,5725.67)              | 6662.78<br>(4963.72,8729.64)             | 7412.53<br>(5728.6,9517.32)            | 6127.09<br>(4806.44,7608.24)              | 5164.52<br>(4116.76,6321.2)               |
| Pakistan                       | 13766844.71<br>(10487617.68,17357<br>923.05) | 414300.02<br>(279634.24,55960<br>8.2) | 1444897.19<br>(996146.91,195648<br>9.66) | 2139122.76<br>(1551096.45,27438<br>15.71) | 2470339.4<br>(1871150.52,30997<br>33.37) | 2632750.54<br>(2049241,3283217.<br>9)  | 2282549.34<br>(1816054.12,282430<br>3.69) | 2382885.46<br>(1924294.43,289075<br>4.51) |
| Palau                          | 0.47 (0.34,0.63)                             | 0.01 (0.01,0.01)                      | 0.02 (0.01,0.03)                         | 0.03 (0.02,0.05)                          | 0.05 (0.03,0.07)                         | 0.08 (0.06,0.1)                        | 0.11 (0.08,0.14)                          | 0.17 (0.13,0.22)                          |
| Palestine                      | 6040.44<br>(4487.28,7848.47)                 | 187.66<br>(124.76,268.19)             | 616.67<br>(416.46,897.73)                | 932.13<br>(664.74,1248.34)                | 1058.95<br>(780.91,1381.6)               | 1101.1<br>(826.63,1398.86)             | 1012.12<br>(782.05,1248.93)               | 1131.82<br>(891.73,1404.82)               |
| Panama                         | 75866.14<br>(55508.31,98629.96)              | 925.48<br>(568.81,1361.66)            | 3642.57<br>(2316.36,5348.12)             | 6282.93<br>(4322.7,8570.06)               | 9442.9<br>(6679.62,13090.03)             | 14294.4<br>(10469.85,19088.49)         | 17052.64<br>(12520.36,21600.62)           | 24225.24<br>(18630.61,29570.99)           |

|                     |                                          |                                    |                                    |                                      |                                       |                                       |                                      |                                       |
|---------------------|------------------------------------------|------------------------------------|------------------------------------|--------------------------------------|---------------------------------------|---------------------------------------|--------------------------------------|---------------------------------------|
|                     | )                                        |                                    |                                    |                                      |                                       | )                                     |                                      |                                       |
| Papua New Guinea    | 4483.2<br>(3213.61,5956.21)              | 127.03<br>(79.88,183.13)           | 402.85<br>(259.19,593.46)          | 602<br>(405.82,834.38)               | 751<br>(525.92,1009.49)               | 861.96<br>(629.31,1144.28)            | 817.21<br>(607.74,1031.78)           | 921.15<br>(705.75,1159.69)            |
| Paraguay            | 162928.71<br>(120530.2,214147.39)        | 2483.44<br>(1586.57,3723.84)       | 9197.74<br>(5782.68,13843.82)      | 16113.06<br>(10143.26,22970.47)      | 24121.41<br>(15714.21,34286.54)       | 33382.21<br>(24641.06,44344.28)       | 35396.82<br>(28029.23,44259.01)      | 42234.02<br>(34633.2,50719.43)        |
| Peru                | 5179985.99<br>(4095203.04,6459374.66)    | 90151.08<br>(64912.21,123306.38)   | 383187.5<br>(274727.51,521880.99)  | 652759.53<br>(493305.23,827264.05)   | 853240.07<br>(657319.04,1087565.82)   | 1027870.96<br>(816974.78,1289190.8)   | 1007345.65<br>(820555.12,1225294.41) | 1165431.2<br>(967409.15,1384872.21)   |
| Philippines         | 3279672.34<br>(2382298.69,4348618.81)    | 84424.3<br>(53593.59,118569.31)    | 279402.77<br>(180860.56,397802.81) | 422545.29<br>(290760.24,573747.1)    | 521553.05<br>(373603.39,704268.34)    | 605050.67<br>(450991.97,807819.82)    | 623573.39<br>(467023.53,797168.4)    | 743122.88<br>(565465.4,949243.04)     |
| Poland              | 8589713.31<br>(6368579.68,11111769.58)   | 56305.12<br>(35210.68,81078.82)    | 225968.36<br>(143785.23,332495.27) | 487022.46<br>(334280.24,667135.47)   | 910883.98<br>(648782.72,1253946.96)   | 1662599.35<br>(1207524.01,2194060.62) | 2117981.77<br>(1542436.7,2723507.73) | 3128952.26<br>(2456560.09,3859544.71) |
| Portugal            | 1022209.3<br>(765523.02,1306400.54)      | 11808.45<br>(7795.74,16500.95)     | 41278.28<br>(27109.28,58965.28)    | 65853.7<br>(45407.31,89535.24)       | 101280.75<br>(71366.51,133926.54)     | 169695.16<br>(126930.15,220347.83)    | 243894.16<br>(181337.48,309933.52)   | 388398.8<br>(305576.54,477191.17)     |
| Puerto Rico         | 32968.39<br>(23613.11,44472.96)          | 380.04<br>(238.75,573.63)          | 1477.14<br>(917.81,2223.71)        | 2579.54<br>(1657.26,3578.4)          | 4025.77<br>(2756.99,5712.56)          | 5863.21<br>(4220.92,8049.22)          | 7646.69<br>(5575.46,10059.43)        | 10996.01<br>(8245.91,14276.01)        |
| Qatar               | 43838.49<br>(32005.43,58107.09)          | 473.19<br>(307.89,675.13)          | 1711.51<br>(1113.52,2474.82)       | 5140.75<br>(3539.37,6980.95)         | 9762<br>(7047.66,13049.58)            | 10900.79<br>(8068.36,14415.23)        | 8704.17<br>(6469.51,11351.6)         | 7146.09<br>(5459.12,9159.78)          |
| Republic of Korea   | 18749993.69<br>(14612156.98,23584615.06) | 151611.77<br>(108477.32,200746.73) | 662352.12<br>(484568.17,892124.89) | 1274952.16<br>(965885.64,1631981.97) | 1838547.01<br>(1400095.21,2378227.96) | 3062281.16<br>(2386417.65,3917268.62) | 4412371.53<br>(3376876.9,5546780.37) | 7347877.93<br>(5889836.1,9017484.53)  |
| Republic of Moldova | 13887.88<br>(10328.35,18438.43)          | 97 (59.49,142.04)                  | 375.84<br>(240.25,557)             | 903.39<br>(601.76,1250.37)           | 1864.76<br>(1279.49,2564.43)          | 2936.41<br>(2195.06,3954.25)          | 3240.29<br>(2439.7,4286.17)          | 4470.19<br>(3512.61,5684.17)          |

|                                  |                                          |                                    |                                       |                                       |                                         |                                          |                                          |                                          |
|----------------------------------|------------------------------------------|------------------------------------|---------------------------------------|---------------------------------------|-----------------------------------------|------------------------------------------|------------------------------------------|------------------------------------------|
|                                  | )                                        |                                    |                                       |                                       |                                         |                                          |                                          |                                          |
| Romania                          | 831944.54<br>(611371.62,1089345.66)      | 10079<br>(6517.2,14197.81)         | 32942.98<br>(21123.63,47636.04)       | 51884.74<br>(35572.7,69723.78)        | 96351.6<br>(68756.51,129690.33)         | 137838.29<br>(101218.9,179731.01)        | 200331.12<br>(148459.86,261576.66)       | 302516.8<br>(229722.81,386790.02)        |
| Russian Federation               | 79224082.92<br>(62657776.91,97936327.22) | 488126.13<br>(304652.87,745227.64) | 1746826.66<br>(1132959.86,2611749.06) | 3943600.89<br>(2741271.91,5260840.39) | 10090856.58<br>(7227457.84,13348309.56) | 17235959.59<br>(13452475.52,21631963.42) | 19622101.02<br>(16057531.49,23732128.88) | 26096612.05<br>(21741427.41,30606108.29) |
| Rwanda                           | 14381.37<br>(10007.39,19773.53)          | 362.85<br>(214.71,544.72)          | 1075.3<br>(645.55,1663.79)            | 1545.22<br>(1005.73,2189.49)          | 2180.93<br>(1500.88,3085.5)             | 2919.02<br>(2094.2,4004.26)              | 2887.76<br>(2016.51,3840.5)              | 3410.29<br>(2529.79,4445.26)             |
| Saint Kitts and Nevis            | 8.85 (6.48,11.68)                        | 0.1 (0.07,0.15)                    | 0.4 (0.25,0.61)                       | 0.72 (0.48,1.01)                      | 1.17 (0.82,1.6)                         | 1.68 (1.25,2.25)                         | 1.94 (1.43,2.51)                         | 2.82 (2.18,3.55)                         |
| Saint Lucia                      | 39.24 (29.45,51)                         | 0.48 (0.31,0.69)                   | 1.89 (1.24,2.75)                      | 3.54 (2.46,4.84)                      | 5.09 (3.7,6.85)                         | 7.44 (5.55,9.88)                         | 8.62 (6.63,10.93)                        | 12.16 (9.56,15.06)                       |
| Saint Vincent and the Grenadines | 8.24 (6.16,10.76)                        | 0.16 (0.1,0.22)                    | 0.54 (0.36,0.77)                      | 0.85 (0.6,1.16)                       | 1.13 (0.83,1.51)                        | 1.58 (1.19,2.11)                         | 1.75 (1.34,2.23)                         | 2.23 (1.75,2.77)                         |
| Samoa                            | 9.44 (6.67,12.68)                        | 0.3 (0.18,0.43)                    | 0.83 (0.52,1.23)                      | 1.21 (0.8,1.66)                       | 1.56 (1.07,2.16)                        | 1.73 (1.25,2.32)                         | 1.66 (1.21,2.16)                         | 2.15 (1.64,2.72)                         |
| San Marino                       | 6.83 (5.2,8.76)                          | 0.12 (0.08,0.16)                   | 0.37 (0.25,0.51)                      | 0.55 (0.39,0.74)                      | 0.74 (0.55,0.98)                        | 1.08 (0.83,1.39)                         | 1.48 (1.15,1.87)                         | 2.49 (1.96,3.11)                         |
| Sao Tome and Principe            | 7.14 (5.01,9.65)                         | 0.21 (0.13,0.31)                   | 0.59 (0.37,0.89)                      | 0.84 (0.55,1.16)                      | 1.12 (0.78,1.53)                        | 1.4 (1,1.86)                             | 1.37 (0.98,1.79)                         | 1.6 (1.19,2.11)                          |
| Saudi Arabia                     | 6990506.24<br>(5309204.88,8874973.84)    | 115226.81<br>(75643.92,157381.04)  | 481913.19<br>(330689.39,673582.22)    | 884707.21<br>(634995.05,1155534.48)   | 1299324.39<br>(968414.75,1659908.94)    | 1567963.08<br>(1204226.29,1988734.6)     | 1339552.89<br>(1049205.31,1659634.66)    | 1301818.69<br>(1046030.18,1580197.91)    |
| Senegal                          | 18049.11<br>(12437.49,24418.78)          | 566.73<br>(348.32,824.34)          | 1648.72<br>(1020.26,2436.65)          | 2371.32<br>(1551.6,3300.23)           | 2990.08<br>(2042.42,4145.31)            | 3421.19<br>(2431.01,4607.23)             | 3231.92<br>(2281.42,4205.44)             | 3819.16<br>(2762.45,4899.57)             |
| Serbia                           | 143622.46<br>(102194.81,191256.89)       | 1429.62<br>(876.72,2072.1)         | 4937.2<br>(3062.12,7317.77)           | 9335.73<br>(6380.67,13049.74)         | 15217.07<br>(10615.2,20816.49)          | 25054.81<br>(17683.09,33524.32)          | 33858.33<br>(23294.67,45833.23)          | 53789.71<br>(40282.34,68643.24)          |

|                 |                                          |                                   |                                    |                                      |                                       |                                      |                                      |                                     |
|-----------------|------------------------------------------|-----------------------------------|------------------------------------|--------------------------------------|---------------------------------------|--------------------------------------|--------------------------------------|-------------------------------------|
| Seychelles      | 9.9 (7.02,13.23)                         | 0.18 (0.11,0.26)                  | 0.56 (0.35,0.83)                   | 0.92 (0.62,1.28)                     | 1.3 (0.92,1.8)                        | 1.78 (1.29,2.39)                     | 2.11 (1.53,2.76)                     | 3.04 (2.22,3.91)                    |
| Sierra Leone    | 8115.74<br>(5700.98,11076.05)            | 275.85<br>(172.81,398.17)         | 830.08<br>(519.44,1227.74)         | 1156.31<br>(780.58,1608.63)          | 1406.23<br>(983.34,1947.34)           | 1511.33<br>(1084.36,2061.51)         | 1433.4<br>(1049.89,1870.19)          | 1502.54<br>(1110.56,1962.47)        |
| Singapore       | 353189.56<br>(259781.58,463367.69)       | 2749.66<br>(1707.74,3967.09)      | 10589.03<br>(6601.63,15623.64)     | 27238.27<br>(18460.33,37912.31)      | 48751.74<br>(34935.26,66827.56)       | 70639.28<br>(52282.56,92346.48)      | 95931.4<br>(71425.35,123322.19)      | 97290.19<br>(74368.71,123368.42)    |
| Slovakia        | 105299.87<br>(76118.23,138531.88)        | 995.87<br>(638.52,1444.47)        | 3655.44<br>(2362.2,5390.91)        | 7283.83<br>(4880.33,9995.94)         | 12506.71<br>(8689.29,17111.53)        | 19560.19<br>(14081.14,25617.88)      | 25179.47<br>(17996.9,33153.63)       | 36118.36<br>(27469.84,45817.54)     |
| Slovenia        | 29763.43<br>(20548.67,40624.15)          | 207.23<br>(130.1,307.36)          | 758.7<br>(473.11,1137.51)          | 1445.74<br>(970.32,2046.23)          | 2708.59<br>(1862.39,3851.95)          | 4776.9<br>(3308.28,6513.81)          | 7141.68<br>(4776.24,10211.11)        | 12724.6<br>(9028.23,16556.18)       |
| Solomon Islands | 34.31 (24.7,45.61)                       | 0.94 (0.59,1.36)                  | 2.81 (1.76,4.15)                   | 4.08 (2.75,5.6)                      | 5.33 (3.72,7.33)                      | 6.57 (4.77,8.86)                     | 6.67 (4.94,8.51)                     | 7.9 (6.15,9.8)                      |
| Somalia         | 3639.49<br>(2554.67,4902.14)             | 117.3<br>(69.19,177.27)           | 320.88<br>(193.46,493.73)          | 422.16<br>(277.71,592.93)            | 497.24<br>(348.08,671.87)             | 681.35<br>(486.79,895.68)            | 770.94<br>(555.55,1005.62)           | 829.61<br>(623.89,1065.03)          |
| South Africa    | 10740607.25<br>(8538869.72,13244556.66)  | 120004.62<br>(76232.52,177171.09) | 482339.93<br>(323767.67,686029.82) | 1130778.25<br>(856206.81,1411744.31) | 1997976.47<br>(1561287.82,2485162.84) | 2518843.57<br>(2006982.32,3090842.6) | 2118594.6<br>(1739291.17,2558849.17) | 2372069.8<br>(1975101.4,2834756.84) |
| South Sudan     | 3979.89<br>(2777.93,5439.12)             | 128.14<br>(76.02,190.95)          | 332.2<br>(197.69,502.36)           | 355.9<br>(229.43,498.27)             | 564.68<br>(385.66,777.56)             | 784.89<br>(562.77,1062.89)           | 826.59<br>(590.07,1113.01)           | 987.49<br>(736.29,1294.08)          |
| Spain           | 15824775.59<br>(14004842.79,17931095.48) | 136787.6<br>(101909,175913.38)    | 430920.64<br>(345909.59,528842.5)  | 797189.09<br>(677324.68,933265.49)   | 1402849.91<br>(1216868.69,1610875.73) | 2553886.5<br>(2250753.68,2897392.9)  | 3979102.75<br>(3536088.46,4505419.1) | 6524039.1<br>(5875988.7,7279386.39) |
| Sri Lanka       | 112638.23<br>(79353.46,153038.9)         | 2369.98<br>(1436.07,3488.58)      | 6887.73<br>(4248.92,10431.87)      | 10902.92<br>(7119.27,15539.6)        | 14777.47<br>(10136.42,20733.42)       | 21254.03<br>(15293.58,28867.89)      | 24753.99<br>(17738.76,32640.83)      | 31692.12<br>(23380.44,41336.73)     |
| Sudan           | 404713.97<br>(307960.86,515581.1)        | 14155.9<br>(9604.52,18922.14)     | 43144.29<br>(29462.31,59790.32)    | 60567.51<br>(44113.25,79879.1)       | 72150.62<br>(54140.61,93295.65)       | 80262.99<br>(62171.81,100843.9)      | 68203.76<br>(54562.85,82943.48)      | 66228.9<br>(53905.51,79906.98)      |

|                               |                                       |                                 |                                   |                                    |                                    |                                    |                                    |                                      |
|-------------------------------|---------------------------------------|---------------------------------|-----------------------------------|------------------------------------|------------------------------------|------------------------------------|------------------------------------|--------------------------------------|
|                               | 69)                                   | )                               | )                                 | 5)                                 | )                                  | 7)                                 |                                    |                                      |
| Suriname                      | 378.72<br>(281.28,493.76)             | 7.96 (5.28,11.12)               | 27.09 (17.93,38.65)               | 40.68 (29.05,54.98)                | 57.54 (41.88,75.86)                | 73.87 (55.97,96.27)                | 73.67 (55.75,93.06)                | 97.9 (75.42,123.82)                  |
| Sweden                        | 1283683.22<br>(978138.88,1646897.44)  | 15906.09<br>(10437.9,22233.15)  | 49880.25<br>(33195.96,70838.05)   | 102619.84<br>(74472.91,136700.58)  | 170431.9<br>(125756.37,230521.49)  | 222729.35<br>(174198.11,281896.3)  | 269588.83<br>(206735.1,343669.45)  | 452526.97<br>(353342.53,561038.42)   |
| Switzerland                   | 1334980.64<br>(953222.44,1775251.2)   | 14515.6<br>(9360.08,20205.01)   | 54115.23<br>(34909.26,77326.62)   | 104529.42<br>(71489.31,144347.68)  | 172328.73<br>(122668.15,239832.46) | 249355.73<br>(181178.33,333110.02) | 295928.35<br>(209852.99,386916.57) | 444207.59<br>(323764.33,573512.84)   |
| Syrian Arab Republic          | 276709.71<br>(205491.68,362881.97)    | 9597.65<br>(6417.78,13518.82)   | 28292.28<br>(18653.72,40895.62)   | 18702.4<br>(13336.69,25283.76)     | 28663.37<br>(20646.7,38175.98)     | 59267.06<br>(44555.45,78478.6)     | 59837.88<br>(45768.51,76396.36)    | 72349.07<br>(56112.82,90132.83)      |
| Taiwan<br>(Province of China) | 1844169.85<br>(1748502.67,1942805.68) | 15000.9<br>(13544.09,16469.01)  | 56205.23<br>(51314.85,61639.19)   | 97794.6<br>(91082.94,105142.71)    | 145588.76<br>(135130.73,157987.03) | 276692.75<br>(262864.8,290880.66)  | 461942.51<br>(435412.25,488650.62) | 790945.11<br>(759153.01,822036.46)   |
| Tajikistan                    | 35259.56<br>(26721.1,45276.68)        | 762.02<br>(520.99,1078.22)      | 2946.92<br>(2011.79,4217.92)      | 4891.84<br>(3577.06,6373.22)       | 6746.58<br>(4973.14,8727.28)       | 7017.46<br>(5361.4,9039.41)        | 5847.86<br>(4588.51,7296.61)       | 7046.89<br>(5688.22,8544.01)         |
| Thailand                      | 2929986.72<br>(2032782.79,4030896.58) | 29013.78<br>(17745.32,42977.62) | 107337.88<br>(67432.15,160676.51) | 192166.76<br>(125101.34,272818.03) | 277788.92<br>(191475.77,410214.73) | 488474.34<br>(339373.92,692931.81) | 679395.78<br>(460808.56,920768.25) | 1155809.25<br>(830845.75,1530509.62) |
| Timor-Leste                   | 125.25<br>(85.16,175.94)              | 4.16 (2.44,6.11)                | 12.02 (7.38,18.42)                | 15.9 (10.18,22.94)                 | 18.18 (12.23,25.92)                | 20.41 (14.18,28.79)                | 22.44 (15.31,30.64)                | 32.15 (23.44,43.13)                  |
| Togo                          | 3343.02<br>(2340.44,4533.75)          | 89.71<br>(54.94,130.57)         | 261.85<br>(160.37,393.09)         | 393.71<br>(260.91,557.67)          | 548.65<br>(382.24,746.41)          | 674.25<br>(482.44,905.28)          | 634.87<br>(456.56,833.85)          | 739.98<br>(542.99,966.89)            |
| Tokelau                       | 0 (0,0.01)                            | 0 (0,0)                         | 0 (0,0)                           | 0 (0,0)                            | 0 (0,0)                            | 0 (0,0)                            | 0 (0,0)                            | 0 (0,0)                              |
| Tonga                         | 2.01 (1.42,2.7)                       | 0.06 (0.04,0.09)                | 0.19 (0.11,0.28)                  | 0.25 (0.16,0.35)                   | 0.3 (0.21,0.42)                    | 0.38 (0.27,0.51)                   | 0.37 (0.27,0.48)                   | 0.45 (0.34,0.58)                     |
| Trinidad and Tobago           | 7918.16<br>(5869.43,10461.79)         | 70.76<br>(43.99,106.49)         | 251.28<br>(159.08,380.17)         | 523.88<br>(336.27,730.9)           | 1032.81<br>(677.81,1485.48)        | 1769.62<br>(1309.79,2335.65)       | 1883.71<br>(1445.62,2416.11)       | 2386.09<br>(1896.87,3007)            |
| Tunisia                       | 174921.52                             | 3117.11                         | 10777.67                          | 18883.66                           | 28045.79                           | 37110.7                            | 36827.01                           | 40159.57                             |

|                             |                                          |                                         |                                          |                                          |                                        |                                          |                                          |                                         |
|-----------------------------|------------------------------------------|-----------------------------------------|------------------------------------------|------------------------------------------|----------------------------------------|------------------------------------------|------------------------------------------|-----------------------------------------|
|                             | (132708.98,224028.41)                    | (2068.75,4353.01)                       | (7327.53,15440.5)                        | (13482.26,25662.16)                      | (20761.4,36824.01)                     | (28390.76,47503.91)                      | (28768.5,45333.94)                       | (31909.77,48910.87)                     |
| Turkmenistan                | 27343.64<br>(20591.93,35379.68)          | 606.16<br>(393.27,849.28)               | 2052.4<br>(1356.59,2906.01)              | 1967676.02<br>(1435263.82,2571443.98)    | 4477.45<br>(3279.49,5893.09)           | 5243.88<br>(4019.14,6801.14)             | 5148.54<br>(4039.12,6474.12)             | 6479.56<br>(5143.82,7973.38)            |
| Tuvalu                      | 0.07 (0.05,0.09)                         | 0 (0,0)                                 | 0.01 (0,0.01)                            | 3335.65<br>(2360.51,4482.65)             | 0.01 (0.01,0.01)                       | 0.01 (0.01,0.02)                         | 0.01 (0.01,0.02)                         | 0.02 (0.01,0.02)                        |
| Türkiye                     | 21908774.84<br>(17041159.09,27886296.74) | 301014.43<br>(213877.55,411484.29)      | 1191575.33<br>(847385.91,1657483.83)     | 0.01 (0.01,0.01)                         | 2884107<br>(2160027.01,3823902.69)     | 4192174.15<br>(3314058.34,5299830.73)    | 4992529.82<br>(3922901.34,6287333.2)     | 6379698.09<br>(5147645.13,7834818.02)   |
| Uganda                      | 100883.65<br>(69700.66,138613.41)        | 3487.71<br>(2082.02,5203.39)            | 9809.46<br>(5952.34,14717.08)            | 13506.05<br>(8918.46,18920.81)           | 16323.2<br>(11360.41,23027.66)         | 18452.65<br>(13032.22,25120.23)          | 17830.06<br>(12625.91,23540.97)          | 21474.53<br>(15729.3,28083.29)          |
| Ukraine                     | 1790644.62<br>(1305352.07,2353786.34)    | 14860.51<br>(9230.02,21982.98)          | 51848.48<br>(31737.39,76955.97)          | 118257.45<br>(78208.45,161507.98)        | 240290.65<br>(169044.69,327137.34)     | 384714.34<br>(288354.63,510645.8)        | 411417.28<br>(302454,532162.67)          | 569255.9<br>(426322.91,723393.6)        |
| United Arab Emirates        | 485678.38<br>(371662.06,611327.63)       | 5653.54<br>(3875.72,7975.84)            | 19403.84<br>(12918.56,27930.52)          | 24346.65<br>(17099.32,32646.12)          | 47906.93<br>(34758,62526.36)           | 150359.84<br>(114235.66,189953.45)       | 140249.47<br>(110226.92,172137.15)       | 97758.12<br>(78547.88,118158.19)        |
| United Kingdom              | 77796301<br>(59871612.32,99126899.68)    | 1072066.14<br>(756819.3,1410068.89)     | 3725631.34<br>(2612253.12,5071158.12)    | 6592738.62<br>(4806891.66,8691965.36)    | 10223341.37<br>(7750815.56,13415447.9) | 14119754.15<br>(11098156.35,18336669.77) | 16320094.17<br>(12554518.78,20490867.92) | 25742675.2<br>(20292157.55,31710721.73) |
| United Republic of Tanzania | 177559.6<br>(123285.59,244630.67)        | 5005.23<br>(2959.75,7391.07)            | 14708.21<br>(8977.94,22109.77)           | 21222.14<br>(14034.83,29883.99)          | 26538.95<br>(18482.26,37987)           | 32808.99<br>(23520.37,45372.43)          | 34337.1<br>(23925.78,45745.95)           | 42938.99<br>(31384.65,56140.47)         |
| United States of America    | 2634665826<br>(2180655686,3112760402)    | 63913803.4<br>(53389090.11,76155080.23) | 140256769.9<br>(115995592.6,168850133.7) | 207524485.3<br>(172455554.9,245300900.8) | 316263056.7<br>(261120888.3,379093468) | 466967931<br>(391664544.7,550883598.1)   | 577392757.6<br>(468426221.1,683106795.7) | 862347021.8<br>(717603794.3,1009370425) |
| United States               | 7.41 (5.53,9.61)                         | 0.12 (0.07,0.17)                        | 0.36 (0.23,0.52)                         | 0.66 (0.46,0.9)                          | 0.98 (0.71,1.29)                       | 1.39 (1.04,1.8)                          | 1.59 (1.21,1.99)                         | 2.33 (1.8,2.95)                         |

|                                          |                                           |                                    |                                        |                                        |                                       |                                         |                                         |                                           |
|------------------------------------------|-------------------------------------------|------------------------------------|----------------------------------------|----------------------------------------|---------------------------------------|-----------------------------------------|-----------------------------------------|-------------------------------------------|
| Virgin Islands                           |                                           |                                    |                                        |                                        |                                       |                                         |                                         |                                           |
| Uruguay                                  | 49329.35<br>(36132.49,64392.45<br>)       | 777.89<br>(506.44,1111.19)         | 2595.97<br>(1646.12,3794.9)            | 4295.78<br>(2865.29,5887.59)           | 6213.01<br>(4402.99,8474.24)          | 9020.41<br>(6633.13,11839.39)           | 11067.17<br>(8210.57,14109.91)          | 15359.12<br>(11867.95,19175.24)           |
| Uzbekistan                               | 1545062.25<br>(1204717.66,191396<br>8.31) | 13800.7<br>(8459.37,20920.56<br>)  | 59756.45<br>(38437.63,88491.07<br>)    | 142996.22<br>(95123.45,190121.<br>48)  | 256449.39<br>(176244.4,335730.4<br>8) | 338954.2<br>(263415.33,418396.<br>87)   | 333902.85<br>(279794.09,392850.<br>45)  | 399202.45<br>(343243.4,467457.38<br>)     |
| Vanuatu                                  | 5.78 (4.09,7.63)                          | 0.17 (0.11,0.24)                   | 0.53 (0.33,0.78)                       | 0.77 (0.51,1.04)                       | 0.92 (0.63,1.24)                      | 1.08 (0.78,1.4)                         | 1.05 (0.77,1.34)                        | 1.26 (0.96,1.59)                          |
| Venezuela<br>(Bolivarian<br>Republic of) | 496999.11<br>(374857.57,652369.<br>25)    | 4484.59<br>(2803.02,6760.39)       | 13679.19<br>(9035.43,20247.17)         | 29722.3<br>(19953.51,40143.2<br>8)     | 60569.4<br>(41969.91,85542.75<br>)    | 95842.63<br>(72653.54,128572.5<br>7)    | 124286.38<br>(94847.86,161505.2)        | 168414.61<br>(133594.31,209597.8<br>9)    |
| Viet Nam                                 | 4659433.16<br>(3308290.88,625130<br>2.88) | 62809.1<br>(38283.77,91609.0<br>4) | 205658.46<br>(126360.44,305703.<br>73) | 422886.62<br>(282065.92,580223<br>.28) | 694654.39<br>(487689.1,947133.3<br>8) | 927743.18<br>(667704.35,123713<br>5.22) | 987798.95<br>(705873.75,1303402<br>.07) | 1357882.46<br>(1000313.56,178609<br>6.15) |
| Yemen                                    | 80309.35<br>(60085.81,103013.8<br>7)      | 2941.77<br>(1961.85,4067.19)       | 7987.44<br>(5425.86,11282.86)          | 11156.29<br>(7988.89,14681.49)         | 14596.29<br>(10736.53,18915.19<br>)   | 16717.53<br>(12764.69,21138.14<br>)     | 13965.34<br>(10897.4,17270.27)          | 12944.69<br>(10310.59,15658.75)           |
| Zambia                                   | 38178.47<br>(26516,52348.36)              | 1156.54<br>(699.23,1706.09)        | 3434.92<br>(2154.15,5267.65)           | 5012.96<br>(3273.98,7082.6)            | 6209.13<br>(4204.34,8597.32)          | 7321.87<br>(5180.09,9892.65)            | 7048.15<br>(4991.08,9430.82)            | 7994.9<br>(6013.11,10371.24)              |
| Zimbabwe                                 | 39166.56<br>(29461.29,50290.53<br>)       | 1019.92<br>(652.25,1482.27)        | 3291.63<br>(2095.39,4837.54)           | 4975.21<br>(3549.19,6604.75)           | 6672.68<br>(4959.86,8565.6)           | 8273.21<br>(6417.54,10462.04)           | 7423.96<br>(5785.08,9197.87)            | 7509.95<br>(6001.98,9140.45)              |

**Table S12. Total healthcare expenditure for women of reproductive age in all age groups due to osteoarthritis in 204 countries or territories in 2021**

| Location            | Total healthcare expenditure (95% uncertainty interval, 2020 US\$) |             |             |             |                                    |                                    |                                       |                                      |
|---------------------|--------------------------------------------------------------------|-------------|-------------|-------------|------------------------------------|------------------------------------|---------------------------------------|--------------------------------------|
|                     | All ages (15-49 years)                                             | 15-19 years | 20-24 years | 25-29 years | 30-34 years                        | 35-39 years                        | 40-44 years                           | 45-49 years                          |
| Afghanistan         | 89731.14<br>(73899.22,107114.87)                                   | 0 (0,0)     | 0 (0,0)     | 0 (0,0)     | 4395.41<br>(3390.56,5552.29)       | 8104.06<br>(6462.95,10239.32)      | 18259.92<br>(15002.03,22329.09)       | 58971.75<br>(49043.68,68994.15)      |
| Albania             | 4237.68<br>(3503.58,5077.2)                                        | 0 (0,0)     | 0 (0,0)     | 0 (0,0)     | 180.81 (137.49,228.84)             | 377.08 (301.38,470.94)             | 957.52 (785,1156.05)                  | 2722.27<br>(2279.71,3221.37)         |
| Algeria             | 1224544.89<br>(1007791.39,1477347.64)                              | 0 (0,0)     | 0 (0,0)     | 0 (0,0)     | 60334.28<br>(45498.31,78401.6)     | 147896.97<br>(115555.27,190146.92) | 322435.48<br>(263234.19,393072.6)     | 693878.16<br>(583503.61,815726.53)   |
| American Samoa      | 1.72 (1.43,2.05)                                                   | 0 (0,0)     | 0 (0,0)     | 0 (0,0)     | 0.06 (0.05,0.07)                   | 0.15 (0.12,0.19)                   | 0.42 (0.34,0.5)                       | 1.09 (0.93,1.28)                     |
| Andorra             | 29.96 (24.69,35.6)                                                 | 0 (0,0)     | 0 (0,0)     | 0 (0,0)     | 0.93 (0.72,1.18)                   | 2.43 (1.93,3.04)                   | 7.05 (5.79,8.58)                      | 19.55 (16.25,22.8)                   |
| Angola              | 119004.15<br>(96574.22,146239.11)                                  | 0 (0,0)     | 0 (0,0)     | 0 (0,0)     | 6963.18<br>(5168.4,9148.85)        | 13966.9<br>(10806.77,17762.05)     | 31167.77<br>(25083.7,38737.81)        | 66906.3<br>(55515.35,80590.4)        |
| Antigua and Barbuda | 13.35 (11,16.05)                                                   | 0 (0,0)     | 0 (0,0)     | 0 (0,0)     | 0.49 (0.38,0.63)                   | 1.28 (1.01,1.6)                    | 3.19 (2.6,3.87)                       | 8.39 (7.02,9.95)                     |
| Argentina           | 4808802.74<br>(3953597.22,5806220.51)                              | 0 (0,0)     | 0 (0,0)     | 0 (0,0)     | 218699.07<br>(169217.95,272436.19) | 509064.42<br>(394916.9,636158.93)  | 1247268.16<br>(1015754.15,1536471.02) | 2833771.1<br>(2373708.21,3361154.37) |
| Armenia             | 10477.52<br>(8319.25,13043.09)                                     | 0 (0,0)     | 0 (0,0)     | 0 (0,0)     | 487.91 (367.63,645.4)              | 1095.08<br>(863.17,1394.01)        | 2569.85<br>(2052.25,3213.46)          | 6324.66<br>(5036.2,7790.22)          |
| Australia           | 4190152.14<br>(3481130.18,5050189.32)                              | 0 (0,0)     | 0 (0,0)     | 0 (0,0)     | 187799.46<br>(147721.82,233876.86) | 443088.36<br>(350676.62,553810.46) | 1003801.42<br>(825073.53,1225580.38)  | 2555462.9<br>(2157658.2,3036921.63)  |
| Austria             | 531484.31<br>(438747.58,633340.53)                                 | 0 (0,0)     | 0 (0,0)     | 0 (0,0)     | 22995.04<br>(18097.85,29329.17)    | 50605.67<br>(40411.75,63251.41)    | 124932.71<br>(102895.75,151566.77)    | 332950.9<br>(277342.23,389193.18)    |
| Azerbaijan          | 55780.95                                                           | 0 (0,0)     | 0 (0,0)     | 0 (0,0)     | 2779.74                            | 5726.38                            | 13116.6                               | 34158.22                             |

|                                     |                                       |         |         |         |                                      |                                     |                                      |                                       |
|-------------------------------------|---------------------------------------|---------|---------|---------|--------------------------------------|-------------------------------------|--------------------------------------|---------------------------------------|
|                                     | (43918.08,69527.21)                   |         |         |         | (2086.48,3580.52)                    | (4517.94,7282.33)                   | (10459.2,16618.65)                   | (26854.47,42045.71)                   |
| Bahamas                             | 450.41<br>(370.81,547.46)             | 0 (0,0) | 0 (0,0) | 0 (0,0) | 17.54 (13.51,22.55)                  | 43.07 (33.73,54.95)                 | 110.77 (90.18,137.06)                | 279.03 (233.39,332.91)                |
| Bahrain                             | 3773.2<br>(3090.13,4559.29)           | 0 (0,0) | 0 (0,0) | 0 (0,0) | 181.17 (136.47,233.65)               | 394.41 (308.14,498.87)              | 1022.43<br>(828.57,1255.59)          | 2175.18<br>(1816.95,2571.18)          |
| Bangladesh                          | 3258854.36<br>(2674141.41,3913203.62) | 0 (0,0) | 0 (0,0) | 0 (0,0) | 185530.95<br>(145521.29,232253.29)   | 395210.99<br>(312226.89,499405.22)  | 870268.07<br>(704866.86,1070995.24)  | 1807844.34<br>(1511526.36,2110549.88) |
| Barbados                            | 105.63 (87.47,126.31)                 | 0 (0,0) | 0 (0,0) | 0 (0,0) | 3.6 (2.76,4.59)                      | 9.51 (7.47,11.91)                   | 24.18 (19.74,29.51)                  | 68.34 (57.5,80.29)                    |
| Belarus                             | 121158.33<br>(97176.11,149159.92)     | 0 (0,0) | 0 (0,0) | 0 (0,0) | 4208.24<br>(3061.84,5637.38)         | 11419.68<br>(8682.12,14528.59)      | 29310.32<br>(23218.09,36868.67)      | 76220.09<br>(62214.06,92125.29)       |
| Belgium                             | 738561.15<br>(605375.67,889428.36)    | 0 (0,0) | 0 (0,0) | 0 (0,0) | 31934.89<br>(24389.26,39980.11)      | 72011.55<br>(56778.35,90297.14)     | 180281.51<br>(146786.84,221991.36)   | 454333.2<br>(377421.22,537159.74)     |
| Belize                              | 73.66 (60.41,89.17)                   | 0 (0,0) | 0 (0,0) | 0 (0,0) | 3.67 (2.84,4.71)                     | 8.34 (6.55,10.67)                   | 18.76 (15.36,23.12)                  | 42.89 (35.66,50.67)                   |
| Benin                               | 7752.73<br>(6320.61,9328.52)          | 0 (0,0) | 0 (0,0) | 0 (0,0) | 472.69 (364.41,605.7)                | 928.47<br>(718.54,1181.33)          | 2046.22<br>(1668.78,2499.91)         | 4305.35<br>(3568.87,5041.57)          |
| Bermuda                             | 26.9 (22.17,32.2)                     | 0 (0,0) | 0 (0,0) | 0 (0,0) | 0.84 (0.64,1.05)                     | 2.43 (1.88,3.05)                    | 6.55 (5.3,8)                         | 17.09 (14.35,20.1)                    |
| Bhutan                              | 196.99<br>(163.28,235.49)             | 0 (0,0) | 0 (0,0) | 0 (0,0) | 13.34 (10.61,16.33)                  | 27.6 (22.1,34.32)                   | 54.99 (44.76,67.2)                   | 101.06 (85.81,117.65)                 |
| Bolivia<br>(Plurinational State of) | 63107.27<br>(52535.66,75530.49)       | 0 (0,0) | 0 (0,0) | 0 (0,0) | 3161.25<br>(2419.25,4052.74)         | 7299.28<br>(5840.55,9130.69)        | 16645.06<br>(13819.78,20213.72)      | 36001.68<br>(30456.08,42133.34)       |
| Bosnia and Herzegovina              | 14859.02<br>(12143.94,18024.45)       | 0 (0,0) | 0 (0,0) | 0 (0,0) | 488.44 (369.7,635.06)                | 1255.97<br>(993.79,1589.33)         | 3711.67<br>(3024.42,4495.7)          | 9402.93<br>(7756.03,11304.36)         |
| Botswana                            | 5564.76<br>(4547.63,6826.42)          | 0 (0,0) | 0 (0,0) | 0 (0,0) | 309.77 (237.25,396.63)               | 711.2 (559.53,908.95)               | 1477.56<br>(1197.89,1827.97)         | 3066.23<br>(2552.96,3692.87)          |
| Brazil                              | 75731123.59<br>(62517846.06,907848)   | 0 (0,0) | 0 (0,0) | 0 (0,0) | 3077646.04<br>(2365480.39,3897563.8) | 7715554.9<br>(6015608.74,9745032.9) | 19228917.27<br>(15764373.06,2336431) | 45709005.38<br>(38372383.86,53777908) |

|                          | 15.49)                                |         |         |         | 1)                                       | 6)                                       | 0.15)                                  | .57)                                  |
|--------------------------|---------------------------------------|---------|---------|---------|------------------------------------------|------------------------------------------|----------------------------------------|---------------------------------------|
| Brunei Darussalam        | 474.85 (390.94,571.6)                 | 0 (0,0) | 0 (0,0) | 0 (0,0) | 20.76 (16.06,25.94)                      | 50.25 (39.25,63.37)                      | 119.69 (98.1,147.14)                   | 284.15 (237.52,335.15)                |
| Bulgaria                 | 89472.94<br>(72093.46,109455.39)      | 0 (0,0) | 0 (0,0) | 0 (0,0) | 2896.01<br>(2116.15,3798.48)             | 7158.8<br>(5463.87,9259.42)              | 20628.65<br>(16411.31,25368.26)        | 58789.48<br>(48102.13,71029.22)       |
| Burkina Faso             | 27099.32<br>(22157.69,32645.51)       | 0 (0,0) | 0 (0,0) | 0 (0,0) | 1820.86<br>(1375.86,2336.84)             | 3608.3<br>(2841.51,4662.31)              | 7051.82<br>(5733.54,8673.11)           | 14618.34<br>(12206.78,16973.25)       |
| Burundi                  | 6113.65<br>(5004.46,7367.14)          | 0 (0,0) | 0 (0,0) | 0 (0,0) | 456.29 (344.89,583.08)                   | 896.88<br>(703.05,1138.86)               | 1651.83<br>(1359.97,1997.64)           | 3108.66<br>(2596.55,3647.56)          |
| Cabo Verde               | 95.12 (78.04,114.63)                  | 0 (0,0) | 0 (0,0) | 0 (0,0) | 5.81 (4.45,7.51)                         | 12.13 (9.58,15.34)                       | 23.94 (19.56,29.45)                    | 53.24 (44.45,62.33)                   |
| Cambodia                 | 44110.08<br>(36440.94,52884.73)       | 0 (0,0) | 0 (0,0) | 0 (0,0) | 2495.37<br>(1954.73,3101.74)             | 5745.08<br>(4556.87,7207.02)             | 11557.78<br>(9480.46,14069.19)         | 24311.84<br>(20448.88,28506.77)       |
| Cameroon                 | 62146.07<br>(50841.06,74275.99)       | 0 (0,0) | 0 (0,0) | 0 (0,0) | 4172.89<br>(3212.91,5202.47)             | 8095.28<br>(6319.89,10164.4)             | 16275.55<br>(13389.04,19515.6)         | 33602.35<br>(27919.21,39393.51)       |
| Canada                   | 8229355.12<br>(6801496.65,9963055.69) | 0 (0,0) | 0 (0,0) | 0 (0,0) | 378528.5<br>(289691.25,478246.02)        | 874095.59<br>(702345.6,1084978.54)       | 2067317.52<br>(1695891.31,2518424.38)  | 4909413.52<br>(4113568.49,5881406.76) |
| Central African Republic | 947.79<br>(774.01,1137.73)            | 0 (0,0) | 0 (0,0) | 0 (0,0) | 55.51 (41.83,71.11)                      | 114.48 (90.14,144.41)                    | 248.17<br>(200.44,301.31)              | 529.63 (441.61,620.9)                 |
| Chad                     | 8028.39<br>(6613.55,9662.4)           | 0 (0,0) | 0 (0,0) | 0 (0,0) | 515.81 (400.99,659.12)                   | 1014.27<br>(794.29,1294.85)              | 2098.21<br>(1728.31,2543.18)           | 4400.1<br>(3689.96,5165.25)           |
| Chile                    | 921535.13<br>(759450.12,1108213.29)   | 0 (0,0) | 0 (0,0) | 0 (0,0) | 44086.73<br>(34287.35,55226.85)          | 93921.56<br>(74111.59,118853.14)         | 217505.41<br>(179265.25,267874.89)     | 566021.42<br>(471785.93,666258.41)    |
| China                    | 2548188845<br>(2114550832,3031388810) | 0 (0,0) | 0 (0,0) | 0 (0,0) | 93693417.39<br>(72910598.49,117165978.1) | 221401648.1<br>(170150971.5,282871566.7) | 510081647.1<br>(416100905,621931729.7) | 1723012133<br>(1455388357,2009419536) |
| Colombia                 | 2800711.51                            | 0 (0,0) | 0 (0,0) | 0 (0,0) | 122051.96                                | 298997.12                                | 714383.26                              | 1665279.17                            |

|                                       |                                    |         |         |         |                                 |                                 |                                   |                                    |
|---------------------------------------|------------------------------------|---------|---------|---------|---------------------------------|---------------------------------|-----------------------------------|------------------------------------|
|                                       | (2298928.32,3350098.58)            |         |         |         | (94394.93,157268.55)            | (235541.98,373513.22)           | (581131.93,856597.54)             | (1387859.47,1962719.26)            |
| Comoros                               | 66.23 (54.53,79.89)                | 0 (0,0) | 0 (0,0) | 0 (0,0) | 3.46 (2.66,4.37)                | 7.17 (5.68,9.02)                | 16.57 (13.63,20.26)               | 39.03 (32.56,46.24)                |
| Congo                                 | 2115.05<br>(1746.03,2556.89)       | 0 (0,0) | 0 (0,0) | 0 (0,0) | 109.38 (81.58,142.14)           | 246.56 (192.43,312.62)          | 563.2 (465.37,689.65)             | 1195.91<br>(1006.65,1412.47)       |
| Cook Islands                          | 0.43 (0.36,0.52)                   | 0 (0,0) | 0 (0,0) | 0 (0,0) | 0.02 (0.01,0.02)                | 0.04 (0.03,0.05)                | 0.11 (0.09,0.13)                  | 0.28 (0.23,0.32)                   |
| Costa Rica                            | 40334.25<br>(33049.72,48266.24)    | 0 (0,0) | 0 (0,0) | 0 (0,0) | 1902.04<br>(1466.55,2412.86)    | 4604.9<br>(3601.44,5773.31)     | 10577.31<br>(8685.07,12758.81)    | 23249.98<br>(19296.65,27321.27)    |
| Croatia                               | 34204.09<br>(28009.85,42338.11)    | 0 (0,0) | 0 (0,0) | 0 (0,0) | 1159.17<br>(861.73,1510.67)     | 3036.25<br>(2375.73,3854.03)    | 8280.56<br>(6739.14,10371.58)     | 21728.11<br>(18033.27,26601.83)    |
| Cuba                                  | 377083.15<br>(310366.97,447674.9)  | 0 (0,0) | 0 (0,0) | 0 (0,0) | 13755.83<br>(10556.53,17539.12) | 30617.03<br>(23825.23,38708.63) | 70222.72<br>(57373.36,84941.99)   | 262487.56<br>(218611.85,306485.16) |
| Cyprus                                | 4117.86<br>(3357.24,4952.11)       | 0 (0,0) | 0 (0,0) | 0 (0,0) | 195.91 (150.26,249.49)          | 479.27 (379.27,593.61)          | 1095.96<br>(888.89,1336.5)        | 2346.73<br>(1938.82,2772.51)       |
| Czechia                               | 478871.03<br>(386566.6,588501.58)  | 0 (0,0) | 0 (0,0) | 0 (0,0) | 13939.77<br>(10174.23,18332.47) | 34861.62<br>(26986.34,44912.6)  | 110030.45<br>(88972.37,136639.53) | 320039.19<br>(260433.66,388616.97) |
| Côte d'Ivoire                         | 67470.43<br>(54930.61,81737.82)    | 0 (0,0) | 0 (0,0) | 0 (0,0) | 4507.87<br>(3365.64,5764.3)     | 9128.22<br>(7050.52,11631.62)   | 18070.43<br>(14713.7,22125.65)    | 35763.92<br>(29800.74,42216.26)    |
| Democratic People's Republic of Korea | 29093.5<br>(23953.53,35185.07)     | 0 (0,0) | 0 (0,0) | 0 (0,0) | 1025.91<br>(803.37,1305.34)     | 2737.87<br>(2138.48,3489.46)    | 6654.22<br>(5388.96,8144.48)      | 18675.5<br>(15622.73,22245.78)     |
| Democratic Republic of the Congo      | 171395.96<br>(140154.96,206866.27) | 0 (0,0) | 0 (0,0) | 0 (0,0) | 10474.07<br>(7920.97,13331.69)  | 21035.72<br>(16441.5,27008.23)  | 44302.9<br>(35940.41,54333.77)    | 95583.28<br>(79852.09,112192.57)   |
| Denmark                               | 197259.95<br>(162964.69,235473.26) | 0 (0,0) | 0 (0,0) | 0 (0,0) | 8438.13<br>(6510.72,10618.24)   | 16668.71<br>(13174.57,20965.54) | 44964.42<br>(36688.37,54309.24)   | 127188.69<br>(106591.03,149580.23) |
| Djibouti                              | 94.54 (77.27,114.69)               | 0 (0,0) | 0 (0,0) | 0 (0,0) | 5.36 (4.06,6.91)                | 11.83 (9.15,15.06)              | 25.81 (21.11,31.89)               | 51.54 (42.95,60.83)                |

|                    |                                       |         |         |         |                                     |                                       |                                       |                                          |
|--------------------|---------------------------------------|---------|---------|---------|-------------------------------------|---------------------------------------|---------------------------------------|------------------------------------------|
| Dominica           | 2.14 (1.75,2.57)                      | 0 (0,0) | 0 (0,0) | 0 (0,0) | 0.1 (0.08,0.12)                     | 0.23 (0.18,0.29)                      | 0.5 (0.41,0.61)                       | 1.3 (1.08,1.54)                          |
| Dominican Republic | 121762.7<br>(99566.66,147421.93)      | 0 (0,0) | 0 (0,0) | 0 (0,0) | 5836.11<br>(4415.48,7515.54)        | 13210.77<br>(10264.06,16756.91)       | 30886.44<br>(25077.85,38300.77)       | 71829.39<br>(59809.27,84848.7)           |
| Ecuador            | 278234.46<br>(228714.93,334343.04)    | 0 (0,0) | 0 (0,0) | 0 (0,0) | 12986.54<br>(9973.1,16453.1)        | 31305.48<br>(24355.78,39789.92)       | 71962.43<br>(58549.96,87725.76)       | 161980.01<br>(135836.1,190374.27)        |
| Egypt              | 4396964.36<br>(3581426.89,5305878.6)  | 0 (0,0) | 0 (0,0) | 0 (0,0) | 239463.08<br>(182483.31,305520.32)  | 552289.9<br>(429460.86,696912.61)     | 1178280.06<br>(954956.81,1433765.39)  | 2426931.32<br>(2014525.92,2869680.28)    |
| El Salvador        | 31640.68<br>(26119.83,38041.96)       | 0 (0,0) | 0 (0,0) | 0 (0,0) | 1385.76<br>(1073.71,1773.21)        | 3136.53<br>(2463.91,3955.64)          | 8123.14<br>(6621.88,9958.37)          | 18995.25<br>(15960.33,22354.74)          |
| Equatorial Guinea  | 702.38 (570.9,859.76)                 | 0 (0,0) | 0 (0,0) | 0 (0,0) | 45.81 (34.56,59.41)                 | 91.7 (71.16,119.19)                   | 186.94<br>(151.29,232.28)             | 377.93 (313.89,448.88)                   |
| Eritrea            | 1102.21<br>(899.31,1326.7)            | 0 (0,0) | 0 (0,0) | 0 (0,0) | 64.02 (48.68,82.23)                 | 132.36 (104.83,167.27)                | 286.23<br>(234.78,342.92)             | 619.59 (511.02,734.28)                   |
| Estonia            | 5339.12<br>(4259.23,6607.92)          | 0 (0,0) | 0 (0,0) | 0 (0,0) | 184.77 (134.92,245.48)              | 457.31 (355.46,584.45)                | 1250.48<br>(984.33,1570.13)           | 3446.55<br>(2784.52,4207.86)             |
| Eswatini           | 530.62 (433.45,641)                   | 0 (0,0) | 0 (0,0) | 0 (0,0) | 36.39 (27.69,46.4)                  | 71.54 (55.33,90.55)                   | 141.25<br>(114.68,172.68)             | 281.44 (235.75,331.37)                   |
| Ethiopia           | 432924<br>(353695.27,527128.63)       | 0 (0,0) | 0 (0,0) | 0 (0,0) | 27788.61<br>(20514.5,36126.28)      | 54061.2<br>(42451.73,68598.53)        | 116946.04<br>(95249.54,143428.55)     | 234128.14<br>(195479.5,278975.26)        |
| Fiji               | 463.59 (385.76,556.2)                 | 0 (0,0) | 0 (0,0) | 0 (0,0) | 20.34 (15.75,25.3)                  | 52.34 (40.98,66.35)                   | 122.34 (100.8,150.16)                 | 268.57 (228.22,314.39)                   |
| Finland            | 125434.58<br>(102938.32,151268.05)    | 0 (0,0) | 0 (0,0) | 0 (0,0) | 5725.15<br>(4447.01,7214.3)         | 13119.16<br>(10392.31,16532.21)       | 31793.33<br>(25830.05,38822)          | 74796.94<br>(62268.95,88699.54)          |
| France             | 23752262<br>(19514260.45,28313207.36) | 0 (0,0) | 0 (0,0) | 0 (0,0) | 968602.53<br>(751631.96,1217959.75) | 2279538.23<br>(1810058.12,2848310.92) | 5617640.97<br>(4581782.29,6804866.12) | 14886480.27<br>(12370788.08,17442070.57) |

|               |                                             |         |         |         |                                      |                                           |                                             |                                              |
|---------------|---------------------------------------------|---------|---------|---------|--------------------------------------|-------------------------------------------|---------------------------------------------|----------------------------------------------|
| Gabon         | 1314.47<br>(1082.49,1598.54)                | 0 (0,0) | 0 (0,0) | 0 (0,0) | 74.77 (55.91,96.47)                  | 148.94 (117.28,191.43)                    | 331.58<br>(271.41,411.21)                   | 759.17 (637.89,899.43)                       |
| Gambia        | 425.96<br>(347.96,519.01)                   | 0 (0,0) | 0 (0,0) | 0 (0,0) | 28.25 (21.66,36.1)                   | 56.1 (43.96,72.39)                        | 114.38 (93.36,141.37)                       | 227.23 (188.98,269.15)                       |
| Georgia       | 12904.83<br>(10326.76,15991.36)             | 0 (0,0) | 0 (0,0) | 0 (0,0) | 498.76 (376,644.42)                  | 1153.07<br>(910.84,1484.57)               | 2985.16<br>(2385.49,3713.81)                | 8267.84<br>(6654.44,10148.56)                |
| Germany       | 44998352.85<br>(37202089.34,538336<br>53.8) | 0 (0,0) | 0 (0,0) | 0 (0,0) | 2114422.91<br>(1642741.04,2647408.9) | 4673773.03<br>(3714426.07,5860798.8<br>9) | 11338314.35<br>(9430579.78,13640114<br>.99) | 26871842.56<br>(22414342.46,31685331<br>.03) |
| Ghana         | 163400.57<br>(133574.81,197696.6<br>7)      | 0 (0,0) | 0 (0,0) | 0 (0,0) | 9649.01<br>(7404.2,12316.16)         | 19820.19<br>(15446.42,25408.94)           | 42551.12<br>(34674.45,52061.62)             | 91380.24<br>(76049.74,107909.95)             |
| Greece        | 285406.01<br>(234002.39,339251.4<br>3)      | 0 (0,0) | 0 (0,0) | 0 (0,0) | 9143.63<br>(7205.67,11416.58)        | 25271.8<br>(20146.72,31259.75)            | 72095.49<br>(58547.87,87504.48)             | 178895.08<br>(148102.13,209070.61)           |
| Greenland     | 11.72 (9.51,14.18)                          | 0 (0,0) | 0 (0,0) | 0 (0,0) | 0.76 (0.59,0.96)                     | 1.55 (1.25,1.93)                          | 2.98 (2.42,3.61)                            | 6.43 (5.25,7.69)                             |
| Grenada       | 8.46 (6.94,10.12)                           | 0 (0,0) | 0 (0,0) | 0 (0,0) | 0.34 (0.26,0.44)                     | 0.75 (0.58,0.94)                          | 1.89 (1.53,2.3)                             | 5.48 (4.57,6.45)                             |
| Guam          | 26.76 (22.22,31.68)                         | 0 (0,0) | 0 (0,0) | 0 (0,0) | 0.95 (0.74,1.19)                     | 2.37 (1.84,2.97)                          | 5.98 (4.86,7.25)                            | 17.46 (14.78,20.26)                          |
| Guatemala     | 110351.55<br>(90734.83,133878.24)           | 0 (0,0) | 0 (0,0) | 0 (0,0) | 5610.24<br>(4357.55,7071.26)         | 12741.62<br>(9887.62,16197.76)            | 30021.16<br>(24506.39,36894.06)             | 61978.53<br>(51983.27,73715.15)              |
| Guinea        | 10042.31<br>(8297.74,12047.81)              | 0 (0,0) | 0 (0,0) | 0 (0,0) | 689.76 (526.53,870.2)                | 1319.16<br>(1038.98,1667.46)              | 2624.38<br>(2154.7,3217.99)                 | 5409 (4577.52,6292.15)                       |
| Guinea-Bissau | 378.63 (309.7,457.43)                       | 0 (0,0) | 0 (0,0) | 0 (0,0) | 26.13 (19.71,33.51)                  | 51.69 (40.56,65.59)                       | 101.62 (83.41,124.84)                       | 199.19 (166.03,233.49)                       |
| Guyana        | 363.34<br>(300.09,439.85)                   | 0 (0,0) | 0 (0,0) | 0 (0,0) | 15.79 (12.16,20.36)                  | 35.36 (27.86,44.98)                       | 92.6 (75.6,113.6)                           | 219.58 (184.47,260.92)                       |
| Haiti         | 14718.21<br>(12168.23,17717.14)             | 0 (0,0) | 0 (0,0) | 0 (0,0) | 807.21 (626.34,1017.48)              | 1901.08<br>(1496.81,2397.58)              | 4014.56<br>(3299.83,4860.35)                | 7995.36<br>(6745.25,9441.73)                 |
| Honduras      | 33094.75                                    | 0 (0,0) | 0 (0,0) | 0 (0,0) | 1765.28                              | 3892.52                                   | 8789.49                                     | 18647.46                                     |

|                               |                                              |         |         |         |                                              |                                              |                                            |                                              |
|-------------------------------|----------------------------------------------|---------|---------|---------|----------------------------------------------|----------------------------------------------|--------------------------------------------|----------------------------------------------|
|                               | (27149.89,39848.64)                          |         |         |         | (1364.21,2229.5)                             | (3058.36,4916.34)                            | (7096.76,10814.11)                         | (15630.56,21888.69)                          |
| Hungary                       | 261970.04<br>(211254.5,320961.1)             | 0 (0,0) | 0 (0,0) | 0 (0,0) | 7241.28<br>(5373.3,9513.53)                  | 18270.08<br>(14138.6,23444.27)               | 62757<br>(50697.63,77285.84)               | 173701.67<br>(141044.97,210717.46)           |
| Iceland                       | 715.82<br>(576.46,875.71)                    | 0 (0,0) | 0 (0,0) | 0 (0,0) | 32.25 (24.64,42.07)                          | 72.33 (55.95,92.7)                           | 183.33<br>(145.65,227.04)                  | 427.91 (350.21,513.9)                        |
| India                         | 500811146.1<br>(413343827.2,595453<br>956.1) | 0 (0,0) | 0 (0,0) | 0 (0,0) | 27577070.35<br>(21914725.23,34274685<br>.49) | 60404370.33<br>(47630396.82,7463747<br>8.51) | 131072636.1<br>(107657133,15842974<br>6.6) | 281757069.3<br>(236141572.2,32811204<br>5.5) |
| Indonesia                     | 25993709.45<br>(21559558.33,309372<br>82.88) | 0 (0,0) | 0 (0,0) | 0 (0,0) | 1088784.31<br>(829318.94,1382602.05)         | 2558329.76<br>(1987115.36,3211177.9<br>4)    | 6482950.5<br>(5347143.11,7903705.<br>64)   | 15863644.87<br>(13395980.93,18439797<br>.26) |
| Iran (Islamic<br>Republic of) | 6824550.78<br>(5620281.59,8260280<br>.11)    | 0 (0,0) | 0 (0,0) | 0 (0,0) | 336438.36<br>(252294.61,432018.88)           | 856741.2<br>(672173.64,1078529.16<br>)       | 1823875.02<br>(1500403.06,2236508.<br>28)  | 3807496.2<br>(3195410.27,4513223.7<br>8)     |
| Iraq                          | 543929.78<br>(449097.67,654974.7<br>1)       | 0 (0,0) | 0 (0,0) | 0 (0,0) | 28583.52<br>(21971.52,36628.56)              | 58098.03<br>(45409.28,73905.5)               | 137322.18<br>(111903.34,166499.73<br>)     | 319926.06<br>(269813.53,377940.92)           |
| Ireland                       | 187406.99<br>(153352.55,224808.1<br>1)       | 0 (0,0) | 0 (0,0) | 0 (0,0) | 6792.84<br>(5296.1,8519.84)                  | 18906.93<br>(14978.8,23920.69)               | 49232.85<br>(40060.16,59485.88)            | 112474.37<br>(93017.49,132881.7)             |
| Israel                        | 257825.92<br>(212333.82,308108.1<br>4)       | 0 (0,0) | 0 (0,0) | 0 (0,0) | 11523.97<br>(9049.73,14462.48)               | 26933.63<br>(21524.86,33495.62)              | 64411.09<br>(52961.1,77957.21)             | 154957.23<br>(128798.13,182192.82)           |
| Italy                         | 15813834.47<br>(13085631.3,1892845<br>1.9)   | 0 (0,0) | 0 (0,0) | 0 (0,0) | 479006.81<br>(369389.39,605950.58)           | 1140758.86<br>(901853.75,1432412.39<br>)     | 3423559.95<br>(2820497.14,4173737.<br>46)  | 10770508.85<br>(8993891.01,12716351.<br>48)  |
| Jamaica                       | 5275.54<br>(4341.22,6362.62)                 | 0 (0,0) | 0 (0,0) | 0 (0,0) | 255.68 (195.52,327.29)                       | 595.43 (464.44,762.38)                       | 1287.57<br>(1050.84,1565.72)               | 3136.85<br>(2630.42,3707.23)                 |
| Japan                         | 110302783.9                                  | 0 (0,0) | 0 (0,0) | 0 (0,0) | 2600123.7                                    | 7382585.39                                   | 22786653.96                                | 77533420.89                                  |

|                                        |                                        |         |         |         |                                 |                                 |                                  |                                    |
|----------------------------------------|----------------------------------------|---------|---------|---------|---------------------------------|---------------------------------|----------------------------------|------------------------------------|
|                                        | (91322493.52,132354<br>156.3)          |         |         |         | (1999571.81,3319981.8<br>3)     | (5780661.1,9255089.75<br>)      | (18532225.19,2780601<br>1.83)    | (65010035.42,91973072<br>.87)      |
| Jordan                                 | 81493.16<br>(66587.11,98480.03)        | 0 (0,0) | 0 (0,0) | 0 (0,0) | 3911.93<br>(2954.84,5101.68)    | 9211.57<br>(7146.19,11631.92)   | 21261.69<br>(17109.06,26244.48)  | 47107.98<br>(39377.02,55501.96)    |
| Kazakhstan                             | 324886.97<br>(256180.6,406906.96)      | 0 (0,0) | 0 (0,0) | 0 (0,0) | 14433.44<br>(10613.04,19062.01) | 30108.76<br>(23207.74,38074.74) | 74806.72<br>(58877.37,94458.58)  | 205538.05<br>(163482.43,255311.62) |
| Kenya                                  | 338913.08<br>(277100.01,414181.2<br>5) | 0 (0,0) | 0 (0,0) | 0 (0,0) | 21015.77<br>(15800,27058.06)    | 41187.48<br>(32160.06,52324.8)  | 87021.65<br>(71117.96,107892.66) | 189688.18<br>(158022,226905.73)    |
| Kiribati                               | 3.43 (2.83,4.1)                        | 0 (0,0) | 0 (0,0) | 0 (0,0) | 0.18 (0.14,0.23)                | 0.42 (0.32,0.52)                | 0.93 (0.76,1.14)                 | 1.9 (1.62,2.22)                    |
| Kuwait                                 | 79773.84<br>(65119.88,96525.68)        | 0 (0,0) | 0 (0,0) | 0 (0,0) | 4136.84<br>(3105.54,5336.98)    | 10551.14<br>(8148.7,13455.75)   | 21632.58<br>(17460.58,26414.92)  | 43453.27<br>(36405.05,51318.03)    |
| Kyrgyzstan                             | 12595.94<br>(9998.84,15775.14)         | 0 (0,0) | 0 (0,0) | 0 (0,0) | 651.61 (479.23,871.51)          | 1245.62<br>(968.18,1609.93)     | 2889.66<br>(2267.84,3660.7)      | 7809.06 (6283.59,9633)             |
| Lao People's<br>Democratic<br>Republic | 7029.9<br>(5784.59,8443.94)            | 0 (0,0) | 0 (0,0) | 0 (0,0) | 396.34 (305.78,501.36)          | 866.79<br>(673.44,1101.87)      | 1818.78<br>(1490.75,2223.37)     | 3947.98<br>(3314.61,4617.33)       |
| Latvia                                 | 9008.57<br>(7235.91,11085.07)          | 0 (0,0) | 0 (0,0) | 0 (0,0) | 297.87 (216.77,388.16)          | 743.85 (575.53,949.81)          | 2018.31<br>(1595.59,2522.44)     | 5948.54<br>(4848.03,7224.67)       |
| Lebanon                                | 40379.53<br>(33166.11,49632.7)         | 0 (0,0) | 0 (0,0) | 0 (0,0) | 2266.55<br>(1731.51,2960.13)    | 4773.66<br>(3705.99,6167.84)    | 10351.22<br>(8457.45,13078.39)   | 22988.09<br>(19271.15,27426.34)    |
| Lesotho                                | 875.29<br>(714.02,1062.43)             | 0 (0,0) | 0 (0,0) | 0 (0,0) | 54.43 (41.69,71.08)             | 109.56 (84.97,139.04)           | 236.65<br>(193.35,291.98)        | 474.66 (394.01,560.33)             |
| Liberia                                | 3102.77<br>(2531.12,3732.29)           | 0 (0,0) | 0 (0,0) | 0 (0,0) | 164.05 (125.91,210.43)          | 379.47 (296.22,470.51)          | 808.36<br>(658.31,984.09)        | 1750.89<br>(1450.67,2067.25)       |
| Libya                                  | 56175.7<br>(46027.23,67706.3)          | 0 (0,0) | 0 (0,0) | 0 (0,0) | 2329.49<br>(1773.2,2977.48)     | 6025.03<br>(4580.09,7594.82)    | 14461.35<br>(11736.56,17779.35)  | 33359.84<br>(27937.38,39354.65)    |
| Lithuania                              | 23965.57<br>(19248.94,29921.91)        | 0 (0,0) | 0 (0,0) | 0 (0,0) | 759.89 (557.66,995.95)          | 1815.23<br>(1384.9,2342.08)     | 5208.2<br>(4131.81,6632.84)      | 16182.25<br>(13174.57,19951.05)    |

|                                  |                                         |         |         |         |                                     |                                       |                                       |                                         |
|----------------------------------|-----------------------------------------|---------|---------|---------|-------------------------------------|---------------------------------------|---------------------------------------|-----------------------------------------|
| Luxembourg                       | 3208.57<br>(2637.7,3874.47)             | 0 (0,0) | 0 (0,0) | 0 (0,0) | 145.68 (114.64,182.6)               | 329.15 (260.78,418.29)                | 801.84<br>(655.72,978.14)             | 1931.91<br>(1606.56,2295.45)            |
| Madagascar                       | 26055.09<br>(21268.29,31062.32)         | 0 (0,0) | 0 (0,0) | 0 (0,0) | 1561.52<br>(1196.59,1980.41)        | 3107.01<br>(2433.84,3911.21)          | 6713.39<br>(5480.15,8093.22)          | 14673.17<br>(12157.71,17077.48)         |
| Malawi                           | 20227.3<br>(16625.28,24471.12)          | 0 (0,0) | 0 (0,0) | 0 (0,0) | 1381.89<br>(1059.14,1774.54)        | 2711.93<br>(2135.14,3426.73)          | 5533.92<br>(4548.33,6820.29)          | 10599.57<br>(8882.68,12449.56)          |
| Malaysia                         | 1104758.45<br>(913826.17,1328980.65)    | 0 (0,0) | 0 (0,0) | 0 (0,0) | 58319.25<br>(44489.16,76151.29)     | 133488.49<br>(102846.03,167898.86)    | 286282.19<br>(233229.59,345032.91)    | 626668.51<br>(533261.38,739897.6)       |
| Maldives                         | 485.72<br>(396.38,588.15)               | 0 (0,0) | 0 (0,0) | 0 (0,0) | 27.38 (20.6,35.03)                  | 66.28 (51.2,84.12)                    | 131.84<br>(107.93,161.99)             | 260.22 (216.66,307.02)                  |
| Mali                             | 19172.63<br>(15653,22997.65)            | 0 (0,0) | 0 (0,0) | 0 (0,0) | 1256.04<br>(944.62,1622.74)         | 2436.08<br>(1936.16,3063.67)          | 5048.09<br>(4138.83,6143.31)          | 10432.42<br>(8633.38,12167.92)          |
| Malta                            | 1056.9<br>(863.49,1270.66)              | 0 (0,0) | 0 (0,0) | 0 (0,0) | 46.62 (36.06,58.89)                 | 106 (83.43,133.48)                    | 262.58 (212.13,321.3)                 | 641.7 (531.87,756.99)                   |
| Marshall Islands                 | 1.79 (1.49,2.17)                        | 0 (0,0) | 0 (0,0) | 0 (0,0) | 0.08 (0.06,0.1)                     | 0.2 (0.16,0.26)                       | 0.48 (0.39,0.6)                       | 1.03 (0.87,1.2)                         |
| Mauritania                       | 2264.66<br>(1857.56,2736.67)            | 0 (0,0) | 0 (0,0) | 0 (0,0) | 133.29 (102.71,170.42)              | 266.1 (207.96,342.07)                 | 581.87<br>(478.58,719.66)             | 1283.4<br>(1068.31,1504.52)             |
| Mauritius                        | 2634.75<br>(2171.99,3156.57)            | 0 (0,0) | 0 (0,0) | 0 (0,0) | 95.99 (71.94,123.95)                | 237.61 (184.57,299.84)                | 706.1 (571.19,860.59)                 | 1595.06<br>(1344.29,1872.19)            |
| Mexico                           | 19777299.91<br>(16317035.88,23688089.1) | 0 (0,0) | 0 (0,0) | 0 (0,0) | 796081.81<br>(614107.46,1011476.14) | 1877164.89<br>(1474368.28,2345734.78) | 4732926.42<br>(3849604.39,5757641.82) | 12371126.8<br>(10378955.75,14573236.36) |
| Micronesia (Federated States of) | 1.44 (1.19,1.72)                        | 0 (0,0) | 0 (0,0) | 0 (0,0) | 0.06 (0.05,0.08)                    | 0.15 (0.11,0.19)                      | 0.35 (0.29,0.43)                      | 0.88 (0.74,1.02)                        |
| Monaco                           | 4.77 (3.97,5.69)                        | 0 (0,0) | 0 (0,0) | 0 (0,0) | 0.16 (0.13,0.21)                    | 0.4 (0.32,0.49)                       | 1.17 (0.97,1.42)                      | 3.04 (2.55,3.56)                        |
| Mongolia                         | 7349.15                                 | 0 (0,0) | 0 (0,0) | 0 (0,0) | 321.71 (231.27,426.34)              | 677.66 (514.63,866.03)                | 1700.42                               | 4649.35                                 |

|             |                                       |         |         |         |                                    |                                   |                                     |                                       |
|-------------|---------------------------------------|---------|---------|---------|------------------------------------|-----------------------------------|-------------------------------------|---------------------------------------|
|             | (5730.58,9187.84)                     |         |         |         |                                    |                                   | (1335,2126.24)                      | (3649.68,5769.24)                     |
| Montenegro  | 703.17 (566.3,861.7)                  | 0 (0,0) | 0 (0,0) | 0 (0,0) | 24.11 (17.55,31.53)                | 63.36 (49.24,80.58)               | 171.62<br>(136.73,212.44)           | 444.08 (362.77,537.15)                |
| Morocco     | 500214.94<br>(412977.66,601173.24)    | 0 (0,0) | 0 (0,0) | 0 (0,0) | 23144.68<br>(17788.6,29671.65)     | 54305.97<br>(42659.26,68873.06)   | 128717.12<br>(105908.81,158071.69)  | 294047.17<br>(246620.98,344556.84)    |
| Mozambique  | 48265.98<br>(39727.39,58211.5)        | 0 (0,0) | 0 (0,0) | 0 (0,0) | 2930.45<br>(2259.86,3705.67)       | 5787.14<br>(4556.57,7274.76)      | 12401.34<br>(10221.03,15360.28)     | 27147.06<br>(22689.92,31870.79)       |
| Myanmar     | 607889.49<br>(505142.27,729259.55)    | 0 (0,0) | 0 (0,0) | 0 (0,0) | 25786.86<br>(19706.34,32492.59)    | 63279.18<br>(50303.09,79835.55)   | 154286.43<br>(126595.36,188094.84)  | 364537.02<br>(308537.48,428836.57)    |
| Namibia     | 3649.49<br>(2998.03,4449.82)          | 0 (0,0) | 0 (0,0) | 0 (0,0) | 212.19 (161.54,271.91)             | 430.24 (338.17,550.19)            | 936.45<br>(764.83,1164.57)          | 2070.6<br>(1733.48,2463.15)           |
| Nauru       | 0.12 (0.1,0.14)                       | 0 (0,0) | 0 (0,0) | 0 (0,0) | 0.01 (0,0.01)                      | 0.01 (0.01,0.02)                  | 0.03 (0.03,0.04)                    | 0.07 (0.06,0.08)                      |
| Nepal       | 151606.51<br>(125595.68,181647.6)     | 0 (0,0) | 0 (0,0) | 0 (0,0) | 9625.47<br>(7696.21,11844.49)      | 20138.78<br>(16014.19,25213.76)   | 41611.68<br>(33722.89,50832.06)     | 80230.58<br>(68162.39,93757.29)       |
| Netherlands | 1589760.57<br>(1308037.65,1903339.99) | 0 (0,0) | 0 (0,0) | 0 (0,0) | 67355.2<br>(52874.98,84438.48)     | 145981.26<br>(115056.3,183203.29) | 362682.27<br>(296631.13,442475.85)  | 1013741.84<br>(843475.24,1193222.38)  |
| New Zealand | 124035.03<br>(101669.85,147977.45)    | 0 (0,0) | 0 (0,0) | 0 (0,0) | 5819.2 (4584.37,7358.1)            | 11539.46<br>(9112.68,14335.66)    | 27912.47<br>(22941.52,34065.78)     | 78763.89<br>(65031.27,92217.91)       |
| Nicaragua   | 18970.12<br>(15507.65,22812.33)       | 0 (0,0) | 0 (0,0) | 0 (0,0) | 964.19 (747.24,1234.92)            | 2216.18<br>(1715.33,2803.29)      | 4987.9<br>(4031.25,6109.64)         | 10801.85<br>(9013.83,12664.47)        |
| Niger       | 14735.81<br>(11937.57,17685.49)       | 0 (0,0) | 0 (0,0) | 0 (0,0) | 882.3 (674.75,1143.23)             | 1740.54<br>(1347.7,2183.34)       | 3845.53<br>(3111.93,4714.62)        | 8267.44<br>(6803.19,9644.31)          |
| Nigeria     | 4697410.26<br>(3884552.26,5633766.34) | 0 (0,0) | 0 (0,0) | 0 (0,0) | 275894.12<br>(212117.22,350730.84) | 520979.6<br>(411200.81,656312.2)  | 1150086.12<br>(948825.9,1399871.18) | 2750450.43<br>(2312408.34,3226852.12) |

|                          |                                       |         |         |         |                                    |                                    |                                      |                                       |
|--------------------------|---------------------------------------|---------|---------|---------|------------------------------------|------------------------------------|--------------------------------------|---------------------------------------|
| Niue                     | 0 (0,0)                               | 0 (0,0) | 0 (0,0) | 0 (0,0) | 0 (0,0)                            | 0 (0,0)                            | 0 (0,0)                              | 0 (0,0)                               |
| North Macedonia          | 5425.36<br>(4435.16,6662.91)          | 0 (0,0) | 0 (0,0) | 0 (0,0) | 210.27 (156.76,274.29)             | 510.82 (397.63,656.18)             | 1346.31<br>(1097.87,1686.1)          | 3357.97<br>(2782.91,4046.34)          |
| Northern Mariana Islands | 1.82 (1.53,2.17)                      | 0 (0,0) | 0 (0,0) | 0 (0,0) | 0.05 (0.04,0.06)                   | 0.14 (0.11,0.17)                   | 0.26 (0.22,0.32)                     | 1.38 (1.17,1.61)                      |
| Norway                   | 196032.21<br>(161563.72,233601.86)    | 0 (0,0) | 0 (0,0) | 0 (0,0) | 8789.02<br>(6801.88,11132.4)       | 17659.84<br>(13990.49,22036.52)    | 44068.54<br>(36313.63,53198.48)      | 125514.81<br>(104457.72,147234.46)    |
| Oman                     | 18298.06<br>(14849.57,22170.71)       | 0 (0,0) | 0 (0,0) | 0 (0,0) | 1213.96<br>(913.44,1569.33)        | 2634.22<br>(2063.89,3311.57)       | 5357.58<br>(4335.49,6534.72)         | 9092.3<br>(7536.75,10755.09)          |
| Pakistan                 | 6046826.68<br>(4959500.23,7399037.57) | 0 (0,0) | 0 (0,0) | 0 (0,0) | 407278.08<br>(316829.06,513540.96) | 759266.86<br>(592375.23,962129.71) | 1609632.72<br>(1317050.53,1986636.3) | 3270649.03<br>(2733245.42,3936730.6)  |
| Palau                    | 0.84 (0.7,0.99)                       | 0 (0,0) | 0 (0,0) | 0 (0,0) | 0.02 (0.02,0.02)                   | 0.06 (0.05,0.07)                   | 0.19 (0.16,0.23)                     | 0.57 (0.48,0.66)                      |
| Palestine                | 3116.27<br>(2554.33,3775.79)          | 0 (0,0) | 0 (0,0) | 0 (0,0) | 183.47 (139.63,236.09)             | 364.65 (287.71,462.99)             | 803.87<br>(655.88,982.97)            | 1764.28<br>(1471.11,2093.74)          |
| Panama                   | 38840.82<br>(31929.42,46628.58)       | 0 (0,0) | 0 (0,0) | 0 (0,0) | 1615.8<br>(1236.25,2046.06)        | 3996.85<br>(3065.49,5043.31)       | 9676.33<br>(7850.29,11865.6)         | 23551.84<br>(19777.4,27673.61)        |
| Papua New Guinea         | 8064.93<br>(6604.11,9705.48)          | 0 (0,0) | 0 (0,0) | 0 (0,0) | 421.82 (325.27,525.76)             | 963.26<br>(750.54,1229.17)         | 2128.94<br>(1729.29,2624.93)         | 4550.91<br>(3799.01,5325.62)          |
| Paraguay                 | 43162.31<br>(35321.42,51677.01)       | 0 (0,0) | 0 (0,0) | 0 (0,0) | 2279.95<br>(1743.7,2904.93)        | 5220.04<br>(4073.33,6576.85)       | 11364.32<br>(9215.65,13698.43)       | 24298<br>(20288.74,28496.8)           |
| Peru                     | 910253.46<br>(745240.25,1099157.99)   | 0 (0,0) | 0 (0,0) | 0 (0,0) | 42551.01<br>(32285.95,54249.86)    | 101411.19<br>(80311.71,128764.81)  | 236236.19<br>(192782.56,288552.51)   | 530055.07<br>(439860.03,627590.81)    |
| Philippines              | 3314037.52<br>(2740229.42,3972087.5)  | 0 (0,0) | 0 (0,0) | 0 (0,0) | 169636.13<br>(130236.79,215588.35) | 351519.68<br>(274976.78,440289.22) | 848924.07<br>(697325.64,1040668.25)  | 1943957.65<br>(1637690.21,2275541.67) |

|                                  |                                          |         |         |         |                                       |                                       |                                        |                                          |
|----------------------------------|------------------------------------------|---------|---------|---------|---------------------------------------|---------------------------------------|----------------------------------------|------------------------------------------|
| Poland                           | 3647389.33<br>(2972286.48,4459325.84)    | 0 (0,0) | 0 (0,0) | 0 (0,0) | 132535.76<br>(97544.84,169461.24)     | 345352.51<br>(269474.9,439641.1)      | 905978.19<br>(734714.2,1125298.21)     | 2263522.87<br>(1870552.55,2724925.28)    |
| Portugal                         | 445189.92<br>(367521.74,537717.57)       | 0 (0,0) | 0 (0,0) | 0 (0,0) | 13547.26<br>(10519.76,17002.95)       | 36551.5<br>(29048.46,45625.25)        | 108336.75<br>(88408.67,131896.79)      | 286754.42<br>(239544.84,343192.58)       |
| Puerto Rico                      | 18197.72<br>(14983.99,21789.73)          | 0 (0,0) | 0 (0,0) | 0 (0,0) | 628.48 (486.25,787)                   | 1573.95<br>(1225.67,2001.35)          | 4442.9<br>(3597.16,5417.01)            | 11552.39<br>(9674.92,13584.37)           |
| Qatar                            | 16351.65<br>(13269.83,19897.16)          | 0 (0,0) | 0 (0,0) | 0 (0,0) | 1194.15<br>(908.85,1530.06)           | 2495.49<br>(1950.28,3197.74)          | 4814.4<br>(3889.59,5894.72)            | 7847.6<br>(6521.11,9274.64)              |
| Republic of Korea                | 15373895.44<br>(12644461.66,18402955.32) | 0 (0,0) | 0 (0,0) | 0 (0,0) | 402820.89<br>(310303.17,507065.79)    | 1167450.12<br>(902957.57,1466292.26)  | 3560347.29<br>(2881440.52,4403904.55)  | 10243277.14<br>(8549760.4,12025692.72)   |
| Republic of Moldova              | 11095.71<br>(8957.42,13529.83)           | 0 (0,0) | 0 (0,0) | 0 (0,0) | 429.93 (321.28,562.03)                | 1109.03<br>(856.76,1407.06)           | 2723.99<br>(2176.49,3379.56)           | 6832.76<br>(5602.89,8181.18)             |
| Romania                          | 695364.5<br>(571838.64,844335.84)        | 0 (0,0) | 0 (0,0) | 0 (0,0) | 22309.93<br>(16751.72,28775.13)       | 52599.34<br>(41831.84,66793.67)       | 168756.44<br>(137375.73,206047.73)     | 451698.79<br>(375879.34,542719.31)       |
| Russian Federation               | 38780869.45<br>(30965880.83,48080592.21) | 0 (0,0) | 0 (0,0) | 0 (0,0) | 1395034.69<br>(1008059.47,1839620.22) | 3629961.18<br>(2788006.06,4633846.09) | 9338325.83<br>(7406955.99,11572628.97) | 24417547.75<br>(19762859.32,30034496.93) |
| Rwanda                           | 13617.58<br>(11152.39,16466.19)          | 0 (0,0) | 0 (0,0) | 0 (0,0) | 838.65 (640.53,1068.03)               | 1778.84<br>(1393.88,2293.12)          | 3651.88<br>(2979.69,4456.22)           | 7348.21<br>(6138.29,8648.81)             |
| Saint Kitts and Nevis            | 5.54 (4.56,6.67)                         | 0 (0,0) | 0 (0,0) | 0 (0,0) | 0.22 (0.17,0.29)                      | 0.55 (0.42,0.69)                      | 1.34 (1.1,1.64)                        | 3.43 (2.87,4.05)                         |
| Saint Lucia                      | 27.2 (22.42,32.81)                       | 0 (0,0) | 0 (0,0) | 0 (0,0) | 0.97 (0.74,1.25)                      | 2.54 (1.97,3.22)                      | 6.55 (5.31,8)                          | 17.13 (14.4,20.35)                       |
| Saint Vincent and the Grenadines | 8.03 (6.57,9.76)                         | 0 (0,0) | 0 (0,0) | 0 (0,0) | 0.3 (0.23,0.38)                       | 0.78 (0.62,1)                         | 2.02 (1.64,2.49)                       | 4.92 (4.09,5.88)                         |

|                       |                                       |         |         |         |                                    |                                    |                                     |                                       |
|-----------------------|---------------------------------------|---------|---------|---------|------------------------------------|------------------------------------|-------------------------------------|---------------------------------------|
| Samoa                 | 12.77 (10.51,15.28)                   | 0 (0,0) | 0 (0,0) | 0 (0,0) | 0.66 (0.51,0.84)                   | 1.41 (1.1,1.79)                    | 3.13 (2.55,3.78)                    | 7.57 (6.35,8.87)                      |
| San Marino            | 5.34 (4.42,6.38)                      | 0 (0,0) | 0 (0,0) | 0 (0,0) | 0.16 (0.12,0.2)                    | 0.39 (0.31,0.49)                   | 1.19 (0.98,1.44)                    | 3.6 (3.01,4.25)                       |
| Sao Tome and Principe | 8.75 (7.11,10.56)                     | 0 (0,0) | 0 (0,0) | 0 (0,0) | 0.47 (0.35,0.59)                   | 1.01 (0.78,1.28)                   | 2.26 (1.83,2.79)                    | 5.01 (4.15,5.89)                      |
| Saudi Arabia          | 4250002.41<br>(3474092.89,5128855.09) | 0 (0,0) | 0 (0,0) | 0 (0,0) | 230792.01<br>(173872.66,291133.37) | 545568.1<br>(418685.38,684082.98)  | 1163885.82<br>(951395.52,1417700.1) | 2309756.48<br>(1930139.32,2735938.64) |
| Senegal               | 21215.08<br>(17182.11,25690.27)       | 0 (0,0) | 0 (0,0) | 0 (0,0) | 1296.48<br>(986.34,1671.62)        | 2552.28<br>(1988.61,3258.03)       | 5409.47<br>(4379.5,6600.41)         | 11956.85<br>(9827.66,14160.22)        |
| Serbia                | 98349.41<br>(81085.61,119662.84)      | 0 (0,0) | 0 (0,0) | 0 (0,0) | 3552.52<br>(2690.05,4604.97)       | 8839.84<br>(6919.04,11303.79)      | 24107.61<br>(19869.42,29533.12)     | 61849.43<br>(51607.1,74220.96)        |
| Seychelles            | 20.03 (16.53,23.87)                   | 0 (0,0) | 0 (0,0) | 0 (0,0) | 0.73 (0.54,0.94)                   | 1.85 (1.41,2.31)                   | 4.88 (3.96,5.93)                    | 12.57 (10.61,14.69)                   |
| Sierra Leone          | 9302.59<br>(7608.62,11256.87)         | 0 (0,0) | 0 (0,0) | 0 (0,0) | 636.11 (487.16,807.45)             | 1184.18<br>(934.33,1496.88)        | 2521.57<br>(2051.74,3104.64)        | 4960.73<br>(4135.39,5847.9)           |
| Singapore             | 342778.36<br>(283310.12,415230.33)    | 0 (0,0) | 0 (0,0) | 0 (0,0) | 12634.02<br>(9617.69,15961.84)     | 33539.04<br>(26035.07,42622.2)     | 102776.21<br>(83858.97,126852.96)   | 193829.09<br>(163798.4,229793.33)     |
| Slovakia              | 87419.39<br>(70658.43,106064.85)      | 0 (0,0) | 0 (0,0) | 0 (0,0) | 2961.25<br>(2198.46,3877.9)        | 7644.15<br>(5956.38,9832.46)       | 21685.39<br>(17274.79,26526.55)     | 55128.6<br>(45228.8,65827.94)         |
| Slovenia              | 15132.23<br>(12226.14,18400.54)       | 0 (0,0) | 0 (0,0) | 0 (0,0) | 480.44 (358.97,622.15)             | 1284.19<br>(995.85,1630.96)        | 3745.36<br>(3002.38,4620.4)         | 9622.24<br>(7868.94,11527.03)         |
| Solomon Islands       | 46.9 (38.56,56.65)                    | 0 (0,0) | 0 (0,0) | 0 (0,0) | 2.24 (1.73,2.87)                   | 5.3 (4.02,6.81)                    | 12.27 (9.98,15.08)                  | 27.09 (22.82,31.89)                   |
| Somalia               | 4066.54<br>(3308.54,4906.95)          | 0 (0,0) | 0 (0,0) | 0 (0,0) | 222.17 (169.11,284.08)             | 493.45 (386.04,627.68)             | 1172.67<br>(963.75,1439.84)         | 2178.24<br>(1789.65,2555.35)          |
| South Africa          | 3233847.69<br>(2639504.9,3968760.88)  | 0 (0,0) | 0 (0,0) | 0 (0,0) | 172267.33<br>(127121.98,222968.76) | 367905.77<br>(288613.46,468397.83) | 792403.45<br>(645433.88,997572.01)  | 1901271.14<br>(1578335.57,2279822.29) |
| South Sudan           | 4345.29                               | 0 (0,0) | 0 (0,0) | 0 (0,0) | 226.33 (172.15,287.76)             | 511.82 (402.95,641.03)             | 1154.83                             | 2452.31                               |

|                                  |                                             |         |         |         |                                    |                                         |                                          |                                          |
|----------------------------------|---------------------------------------------|---------|---------|---------|------------------------------------|-----------------------------------------|------------------------------------------|------------------------------------------|
|                                  | (3559.1,5188.42)                            |         |         |         |                                    |                                         | (942.25,1385.66)                         | (2041.75,2873.97)                        |
| Spain                            | 10896687.32<br>(8985764.84,1308854<br>5.45) | 0 (0,0) | 0 (0,0) | 0 (0,0) | 327699.81<br>(256458.08,415768.14) | 893205.51<br>(706638.29,1135831.77<br>) | 2723590.4<br>(2217519.74,3358534.<br>42) | 6952191.6<br>(5805148.72,8178411.1<br>2) |
| Sri Lanka                        | 235550.21<br>(193854.52,282156.4<br>1)      | 0 (0,0) | 0 (0,0) | 0 (0,0) | 8933.53<br>(6794.52,11350.34)      | 24055.68<br>(18301.81,30488.24)         | 61980.16<br>(50322.43,75286.69)          | 140580.84<br>(118435.76,165031.15)       |
| Sudan                            | 243613.41<br>(199862.7,294824.77)           | 0 (0,0) | 0 (0,0) | 0 (0,0) | 14881.99<br>(11552.36,18928.65)    | 32272.75<br>(25207.82,40646.18)         | 66854<br>(54779.52,82133.6)              | 129604.68<br>(108323,153116.34)          |
| Suriname                         | 455.56<br>(374.94,549.08)                   | 0 (0,0) | 0 (0,0) | 0 (0,0) | 18.7 (14.19,24.2)                  | 46.32 (35.97,58.86)                     | 109.54 (90.13,133.63)                    | 280.99 (234.65,332.39)                   |
| Sweden                           | 484099.92<br>(391571.58,590032.8)           | 0 (0,0) | 0 (0,0) | 0 (0,0) | 24062.53<br>(18210.66,31712.8)     | 44202.66<br>(34822.79,56917.91)         | 109425.37<br>(88268.09,136367.71)        | 306409.36<br>(250270.04,365034.38)       |
| Switzerland                      | 646387.15<br>(528917.06,774420.5<br>7)      | 0 (0,0) | 0 (0,0) | 0 (0,0) | 28588<br>(22328.54,35927.88)       | 65953.37<br>(52293.88,83076.69)         | 159862.78<br>(129457.42,195513.1)        | 391982.99<br>(324837.22,459902.9)        |
| Syrian Arab<br>Republic          | 191965.11<br>(158720.05,231680.2<br>7)      | 0 (0,0) | 0 (0,0) | 0 (0,0) | 5022.41<br>(3845.13,6576.71)       | 20025.54<br>(15676.48,26049.44)         | 49037.48<br>(40123.92,59437.18)          | 117879.68<br>(99074.52,139616.94)        |
| Taiwan<br>(Province of<br>China) | 2757380.01<br>(2283399.12,3276590<br>.16)   | 0 (0,0) | 0 (0,0) | 0 (0,0) | 77301.83<br>(59280.64,100362.57)   | 246685.08<br>(192300.62,314970.39)      | 728774.51<br>(594078.6,887894.98)        | 1704618.6<br>(1437739.26,1973362.2<br>1) |
| Tajikistan                       | 14777.96<br>(11822.91,18436.83)             | 0 (0,0) | 0 (0,0) | 0 (0,0) | 870.89 (647.19,1138.99)            | 1651.39<br>(1299.46,2101.56)            | 3484.06<br>(2800.82,4366.93)             | 8771.61<br>(7075.44,10829.35)            |
| Thailand                         | 4426204.22<br>(3651680.42,5348769<br>.85)   | 0 (0,0) | 0 (0,0) | 0 (0,0) | 124420.88<br>(95986.98,156726.87)  | 373540.18<br>(288257.33,475342.64)      | 1047816.96<br>(848890.38,1300097.7<br>2) | 2880426.2<br>(2418545.72,3416602.6<br>3) |
| Timor-Leste                      | 185.12<br>(152.39,222.29)                   | 0 (0,0) | 0 (0,0) | 0 (0,0) | 10.11 (7.65,12.95)                 | 20.22 (15.7,25.27)                      | 46.07 (37.72,55.53)                      | 108.72 (91.31,128.54)                    |

|                             |                                          |         |         |         |                                      |                                      |                                       |                                          |
|-----------------------------|------------------------------------------|---------|---------|---------|--------------------------------------|--------------------------------------|---------------------------------------|------------------------------------------|
| Togo                        | 4240.76<br>(3469.42,5096.68)             | 0 (0,0) | 0 (0,0) | 0 (0,0) | 243.2 (185.81,313.21)                | 517.17 (407.13,652.79)               | 1093.08<br>(890.49,1326.9)            | 2387.31<br>(1985.99,2803.78)             |
| Tokelau                     | 0.01 (0.01,0.01)                         | 0 (0,0) | 0 (0,0) | 0 (0,0) | 0 (0,0)                              | 0 (0,0)                              | 0 (0,0)                               | 0 (0,0)                                  |
| Tonga                       | 2.97 (2.45,3.56)                         | 0 (0,0) | 0 (0,0) | 0 (0,0) | 0.13 (0.1,0.17)                      | 0.32 (0.25,0.41)                     | 0.75 (0.61,0.93)                      | 1.77 (1.48,2.05)                         |
| Trinidad and Tobago         | 3789.55<br>(3116.28,4585.59)             | 0 (0,0) | 0 (0,0) | 0 (0,0) | 156.58 (120.04,199.36)               | 440.71 (342.82,556.97)               | 976.37<br>(789.68,1198.1)             | 2215.89<br>(1863.75,2631.16)             |
| Tunisia                     | 121215.2<br>(99996.67,146040.13)         | 0 (0,0) | 0 (0,0) | 0 (0,0) | 5139.86<br>(3808.12,6729.34)         | 13259.64<br>(10454.42,16899.68)      | 32246.49<br>(26449.91,39236.11)       | 70569.21<br>(59284.22,83174.99)          |
| Turkmenistan                | 25083.13<br>(19865.41,31219.38)          | 0 (0,0) | 0 (0,0) | 0 (0,0) | 1123.18<br>(845.54,1476.58)          | 2332.15<br>(1818.2,2996.69)          | 5814.75<br>(4611.06,7251.93)          | 15813.04<br>(12590.61,19494.18)          |
| Tuvalu                      | 0.11 (0.09,0.13)                         | 0 (0,0) | 0 (0,0) | 0 (0,0) | 0.01 (0,0.01)                        | 0.01 (0.01,0.02)                     | 0.03 (0.02,0.03)                      | 0.07 (0.05,0.08)                         |
| Türkiye                     | 8657569.45<br>(7117177.1,10428245.78)    | 0 (0,0) | 0 (0,0) | 0 (0,0) | 342532.19<br>(259921.44,435752.94)   | 865651.92<br>(682992.06,1110256.68)  | 2242633.55<br>(1822951.13,2765896.31) | 5206751.78<br>(4351312.45,6116339.85)    |
| Uganda                      | 102389.01<br>(84054.61,122874.85)        | 0 (0,0) | 0 (0,0) | 0 (0,0) | 7007.15<br>(5422.29,8908.52)         | 12920.53<br>(10215.02,16324.98)      | 26539.42<br>(21853.26,32485.28)       | 55921.92<br>(46564.04,65156.06)          |
| Ukraine                     | 1975574.16<br>(1580231.24,2444950.3)     | 0 (0,0) | 0 (0,0) | 0 (0,0) | 68205.96<br>(49646.93,89574.73)      | 181541.15<br>(140499.64,232393.25)   | 464260.76<br>(371026.37,582411.97)    | 1261566.29<br>(1019058.3,1540570.35)     |
| United Arab Emirates        | 244466.13<br>(199676.22,295638.84)       | 0 (0,0) | 0 (0,0) | 0 (0,0) | 6128.87<br>(4570.33,7839.71)         | 36799.71<br>(28675.54,47158.38)      | 83955.68<br>(68218.77,103096.96)      | 117581.87<br>(98211.58,137543.79)        |
| United Kingdom              | 25277705.67<br>(20806903.19,30054687.15) | 0 (0,0) | 0 (0,0) | 0 (0,0) | 1186859.44<br>(928218.41,1493474.66) | 2471352.7<br>(1952129.13,3063589.45) | 5929538.52<br>(4909847.11,7158758.57) | 15689955.01<br>(13016708.55,18338864.47) |
| United Republic of Tanzania | 188681.33<br>(154220.08,227193.82)       | 0 (0,0) | 0 (0,0) | 0 (0,0) | 11200.53<br>(8560.54,14495.73)       | 22297.65<br>(17507.57,28212.42)      | 49181.33<br>(40239.65,60071.5)        | 106001.82<br>(87912.32,124414.16)        |
| United States               | 1512859298                               | 0 (0,0) | 0 (0,0) | 0 (0,0) | 76290173.89                          | 163710938                            | 376086027.1                           | 896772158.7                              |

|                                          |                                           |         |         |         |                                   |                                   |                                          |                                           |
|------------------------------------------|-------------------------------------------|---------|---------|---------|-----------------------------------|-----------------------------------|------------------------------------------|-------------------------------------------|
| of America                               | (1264659747,178616<br>3911)               |         |         |         | (62788449.09,92929679<br>.58)     | (132695236.6,1991125<br>44.3)     | (314451422.8,4494830<br>39.3)            | (754724638.5,10446386<br>48)              |
| United States<br>Virgin<br>Islands       | 6.98 (5.76,8.39)                          | 0 (0,0) | 0 (0,0) | 0 (0,0) | 0.23 (0.18,0.29)                  | 0.61 (0.48,0.77)                  | 1.62 (1.33,1.99)                         | 4.52 (3.77,5.33)                          |
| Uruguay                                  | 26461.29<br>(21763.98,31517.36)           | 0 (0,0) | 0 (0,0) | 0 (0,0) | 1088.17 (855.97,1373.1)           | 2607.16<br>(2054.74,3286.93)      | 6709.14<br>(5486.44,8145.55)             | 16056.82<br>(13366.83,18711.79)           |
| Uzbekistan                               | 378068.66<br>(297572.5,469943.4)          | 0 (0,0) | 0 (0,0) | 0 (0,0) | 18130.26<br>(13326.07,23577.06)   | 38208.85<br>(29641.78,48815.11)   | 89986.11<br>(71591.94,111960.26)         | 231743.43<br>(183012.7,285590.97)         |
| Vanuatu                                  | 8.47 (7.02,10.16)                         | 0 (0,0) | 0 (0,0) | 0 (0,0) | 0.42 (0.33,0.53)                  | 0.96 (0.74,1.21)                  | 2.17 (1.78,2.64)                         | 4.91 (4.17,5.79)                          |
| Venezuela<br>(Bolivarian<br>Republic of) | 171367.58<br>(141371.97,205961.4<br>4)    | 0 (0,0) | 0 (0,0) | 0 (0,0) | 6994.02<br>(5325.56,8916.09)      | 17460.55<br>(13731.89,22129.12)   | 44872.59<br>(36585.19,54569.02)          | 102040.41<br>(85729.33,120347.21)         |
| Viet Nam                                 | 4182963.77<br>(3440804.29,5068043<br>.75) | 0 (0,0) | 0 (0,0) | 0 (0,0) | 191989.95<br>(148253.6,244472.62) | 464106.15<br>(362162.2,594471.64) | 1055474.19<br>(865453.48,1300100.1<br>1) | 2471393.49<br>(2064935.01,2928999.3<br>7) |
| Yemen                                    | 57841.02<br>(47100.44,70404.12)           | 0 (0,0) | 0 (0,0) | 0 (0,0) | 3622.82<br>(2775.14,4641.79)      | 8123.56<br>(6428.33,10340.6)      | 16320.8<br>(13229.54,20134.32)           | 29773.84<br>(24667.43,35287.41)           |
| Zambia                                   | 37037.51<br>(30319.57,44628.56)           | 0 (0,0) | 0 (0,0) | 0 (0,0) | 2510.72<br>(1921.93,3196.95)      | 4821.98<br>(3778.3,6088.11)       | 9918.86<br>(8109.92,12142.29)            | 19785.96<br>(16509.42,23201.22)           |
| Zimbabwe                                 | 26739.95<br>(22068.97,31935.77)           | 0 (0,0) | 0 (0,0) | 0 (0,0) | 1584.15<br>(1224.12,2025.22)      | 3414.99<br>(2710.27,4300.22)      | 7252.77<br>(5958.48,8716.93)             | 14488.04<br>(12176.1,16893.4)             |

**Table S13. Total healthcare expenditure for women of reproductive age in all age groups due to neck pain in 204 countries or territories in 2021**

| Location            | Total healthcare expenditure (95% uncertainty interval, 2020 US\$) |                                        |                                         |                                         |                                          |                                           |                                           |                                           |
|---------------------|--------------------------------------------------------------------|----------------------------------------|-----------------------------------------|-----------------------------------------|------------------------------------------|-------------------------------------------|-------------------------------------------|-------------------------------------------|
|                     | All ages (15-49 years)                                             | 15-19 years                            | 20-24 years                             | 25-29 years                             | 30-34 years                              | 35-39 years                               | 40-44 years                               | 45-49 years                               |
| Afghanistan         | 903795.88<br>(531576.87,141872<br>0.72)                            | 30557.61<br>(16606.99,51310.7<br>3)    | 44075.9<br>(23034.69,76224.4<br>1)      | 77790.57<br>(41355.64,128935.54<br>)    | 105139.05<br>(64110.26,171676.<br>74)    | 139987.78<br>(80180.8,220892.2<br>8)      | 187795.26<br>(112970.6,287507.1<br>7)     | 318449.72<br>(193317.89,482173.<br>84)    |
| Albania             | 16721.57<br>(9585.83,26658.57)                                     | 425.27<br>(227.8,727.37)               | 785.5<br>(407.42,1410.41)               | 1431.73<br>(742.64,2390.38)             | 2041.2<br>(1215.8,3337.14)               | 2787.44<br>(1586.81,4461.94)              | 3800.82<br>(2268.09,5799.74)              | 5449.62<br>(3137.27,8531.6)               |
| Algeria             | 9138451.29<br>(5406310.47,14269<br>538.67)                         | 128938.35<br>(70073.47,216506.<br>48)  | 211085.44<br>(110316.24,365049<br>.04)  | 508268.95<br>(270209.91,842440.5<br>5)  | 1079778.94<br>(658412.84,176312<br>1.71) | 1929508<br>(1105164.42,30446<br>47.22)    | 2486627.4<br>(1495861.75,380692<br>8.75)  | 2794244.21<br>(1696271.85,423084<br>4.92) |
| American Samoa      | 4.16 (2.41,6.6)                                                    | 0.09 (0.05,0.16)                       | 0.13 (0.07,0.22)                        | 0.23 (0.12,0.38)                        | 0.4 (0.24,0.63)                          | 0.65 (0.37,1.07)                          | 1.08 (0.64,1.66)                          | 1.59 (0.92,2.48)                          |
| Andorra             | 108.68<br>(64.95,164.91)                                           | 1.67 (0.97,2.77)                       | 2.24 (1.2,3.82)                         | 4.21 (2.32,6.83)                        | 8.93 (5.27,14.14)                        | 17.65 (10.21,26.55)                       | 29.72 (18.21,44.38)                       | 44.25 (26.78,66.41)                       |
| Angola              | 623884.54<br>(361144.81,992557.<br>42)                             | 23336.91<br>(12584,39330.59)           | 29774.89<br>(15964.63,52277.1<br>2)     | 51963.89<br>(28346.69,85119.23)         | 83592.33<br>(50230.36,137365.<br>03)     | 118960.79<br>(67415.99,190929.<br>45)     | 151885.91<br>(89725.73,230367.7)          | 164369.83<br>(96877.41,257168.3<br>1)     |
| Antigua and Barbuda | 40.86 (23.67,65.31)                                                | 0.96 (0.52,1.61)                       | 1.81 (0.94,3.14)                        | 3.43 (1.83,5.67)                        | 5.22 (3.17,8.37)                         | 7.5 (4.18,11.95)                          | 9.49 (5.67,14.79)                         | 12.47 (7.36,19.79)                        |
| Argentina           | 12768792.48<br>(7390744.76,20026<br>451.11)                        | 416859.8<br>(227742.99,703187<br>.97)  | 596347.29<br>(318356.04,105312<br>7.62) | 1001506.6<br>(540755.77,1637510.<br>31) | 1545472.62<br>(935298.32,250987<br>8.26) | 2329267.21<br>(1312774.74,36434<br>81.98) | 3157290.12<br>(1863539.08,480022<br>9.94) | 3722048.86<br>(2192277.82,567903<br>5.02) |
| Armenia             | 37638.91<br>(21662.38,59884.44<br>)                                | 733.97<br>(393.16,1255.37)             | 1179.97<br>(612.02,2118.71)             | 2837.73<br>(1471.93,4737.79)            | 5434.61<br>(3237.01,8885.01)             | 7818.71<br>(4450.97,12515.66)             | 9231.44<br>(5508.75,14086.42)             | 10402.49<br>(5988.55,16285.49)            |
| Australia           | 6245084.95<br>(3593803.1,100131<br>86.84)                          | 192469.81<br>(105593.56,329892<br>.73) | 250793.12<br>(130665.99,435859<br>.52)  | 467175.36<br>(252893.96,763611.1<br>8)  | 748402.04<br>(453464.28,121771<br>1.27)  | 1094502.92<br>(629046.26,177016<br>2.09)  | 1440217.85<br>(848636.53,2240078<br>.07)  | 2051523.84<br>(1173502.52,325587<br>1.98) |

|            |                                            |                                      |                                        |                                        |                                         |                                          |                                          |                                          |
|------------|--------------------------------------------|--------------------------------------|----------------------------------------|----------------------------------------|-----------------------------------------|------------------------------------------|------------------------------------------|------------------------------------------|
| Austria    | 2664575.52<br>(1603246.28,40534<br>49.73)  | 50991.98<br>(29512.29,85444.2<br>4)  | 71791.87<br>(39034.77,120472.<br>52)   | 151141.73<br>(85069.42,234702.71<br>)  | 284782.35<br>(169827.51,449138<br>.32)  | 470892.29<br>(265835.22,721096<br>.83)   | 671543.02<br>(406630.77,991155.<br>29)   | 963432.28<br>(607336.29,1451439<br>.81)  |
| Azerbaijan | 200014.42<br>(114827.11,319059.<br>24)     | 4432.13<br>(2374.13,7580.62)         | 7604.67<br>(3944.39,13654.68)          | 17846.28<br>(9256.85,29795.63)         | 30174.46<br>(17972.81,49331.9<br>8)     | 39815.59<br>(22665.85,63734)             | 45754.72<br>(27303.6,69818.01)           | 54386.57<br>(31309.49,85144.32)          |
| Bahamas    | 1375.12<br>(795.77,2199.61)                | 40.96 (22.06,68.93)                  | 63.74<br>(33.16,110.71)                | 120.44 (64.42,199.2)                   | 179.24<br>(108.67,287.13)               | 245.47<br>(136.84,391.34)                | 320.57 (191.6,499.7)                     | 404.7 (239.01,642.6)                     |
| Bahrain    | 25705.93<br>(15217.76,40122.14<br>)        | 381.26<br>(207.2,640.19)             | 673.8<br>(352.14,1165.27)              | 1459.18<br>(775.74,2418.55)            | 2987.6<br>(1821.74,4878.32)             | 4780.37<br>(2738.05,7543.13)             | 7317.82<br>(4402.12,11203.3)             | 8105.91<br>(4920.77,12273.38)            |
| Bangladesh | 6285498.95<br>(3607675.01,10102<br>387.24) | 173102.87<br>(91035.1,296416.7<br>8) | 245919.54<br>(131176.15,429833<br>.32) | 458040.49<br>(243685.98,765223.1<br>2) | 772626.21<br>(454258.84,126554<br>4.19) | 1160787.56<br>(657329.31,190510<br>1.03) | 1562685.67<br>(915234.39,2427832<br>.16) | 1912336.6<br>(1114955.24,301243<br>6.65) |
| Barbados   | 302.88<br>(175.61,483.82)                  | 7.02 (3.78,11.81)                    | 12.42 (6.46,21.57)                     | 23.47 (12.55,38.82)                    | 36.69 (22.24,58.77)                     | 54.3 (30.27,86.58)                       | 70.05 (41.87,109.19)                     | 98.92 (58.42,157.07)                     |
| Belarus    | 315181.93<br>(181752.34,499778.<br>73)     | 5348.36<br>(2864.92,9147.72)         | 8428.77<br>(4371.83,15134.42)          | 18376.16<br>(9531.69,30680.29)         | 38679.96<br>(23038.94,63237.6)          | 62494.64<br>(35576.35,100036.<br>99)     | 79704.98<br>(47563.05,121623.3<br>7)     | 102149.06<br>(58805.55,159918.3<br>4)    |
| Belgium    | 2883396.24<br>(1725638.25,44411<br>60.51)  | 63072.57<br>(35395.97,105003.<br>18) | 82286.1<br>(43014.83,144451.<br>31)    | 162241.12<br>(88801.63,262908.13<br>)  | 307510.7<br>(186562.49,485598<br>.44)   | 517172.65<br>(294690.06,790538<br>.39)   | 744765<br>(450297.16,1105829<br>.18)     | 1006348.1<br>(626876.12,1546831<br>.88)  |
| Belize     | 262.62<br>(151.19,421.58)                  | 10.61 (5.71,17.85)                   | 16.82 (8.75,29.21)                     | 27.86 (14.9,46.07)                     | 38.21 (23.16,61.2)                      | 48.91 (27.27,77.98)                      | 56.02 (33.48,87.33)                      | 64.2 (37.92,101.94)                      |
| Benin      | 58591.6<br>(34218.94,92804.91<br>)         | 2130.05<br>(1161.31,3595.91)         | 2925.28<br>(1515.08,5162.35)           | 5035.05<br>(2737.93,8509.79)           | 7474.43<br>(4593.58,12226.49)           | 10918.25<br>(6241.92,17502.09)           | 14496<br>(8636.87,21742.69)              | 15612.54<br>(9332.24,24065.59)           |
| Bermuda    | 71.81<br>(41.75,114.45)                    | 1.3 (0.7,2.2)                        | 2.24 (1.16,3.89)                       | 4.55 (2.43,7.52)                       | 8.16 (4.95,13.07)                       | 13.35 (7.44,21.29)                       | 18.3 (10.94,28.53)                       | 23.91 (14.12,37.96)                      |

|                                        |                                            |                                            |                                             |                                              |                                              |                                              |                                             |                                              |
|----------------------------------------|--------------------------------------------|--------------------------------------------|---------------------------------------------|----------------------------------------------|----------------------------------------------|----------------------------------------------|---------------------------------------------|----------------------------------------------|
| Bhutan                                 | 382.46<br>(219.42,615.46)                  | 10.15 (5.34,17.38)                         | 14.69 (7.84,25.67)                          | 28.79 (15.32,48.1)                           | 51.89 (30.51,85)                             | 77.56 (43.92,127.3)                          | 95.31 (55.82,148.08)                        | 104.06<br>(60.67,163.92)                     |
| Bolivia<br>(Plurinational<br>State of) | 222944.22<br>(128493.81,357562.<br>36)     | 7665.87<br>(4128.82,12900.41)              | 13100.01<br>(6815.54,22752.8)               | 23914.87<br>(12790.46,39554.81)              | 32896.96<br>(19945.08,52697.3<br>8)          | 41907.7<br>(23363.33,66811.7)                | 49254.66<br>(29438.34,76777.73)             | 54204.15<br>(32012.22,86067.54)              |
| Bosnia and<br>Herzegovina              | 48210.95<br>(27760.69,76457.1)             | 957.96<br>(513.14,1638.48)                 | 1691.76<br>(877.49,3037.67)                 | 3111.33<br>(1613.84,5194.59)                 | 5025.42<br>(2993.29,8216.02)                 | 8286.04<br>(4717,13263.7)                    | 12890.42<br>(7692.21,19669.73)              | 16248.02<br>(9353.72,25436.92)               |
| Botswana                               | 29001.5<br>(16831.43,45974.01<br>)         | 638.38<br>(344.23,1075.88)                 | 956.96<br>(513.1,1680.18)                   | 2042.3<br>(1114.09,3345.39)                  | 3742.4<br>(2248.79,6149.77)                  | 6278.01<br>(3557.79,10076.06)                | 7505.61<br>(4433.89,11383.87)               | 7837.85<br>(4619.53,12262.86)                |
| Brazil                                 | 300632835.5<br>(173846696,481917<br>255.3) | 7505107.71<br>(4039055.04,12479<br>390.33) | 14595715.79<br>(7737883.68,25945<br>328.56) | 27683978.29<br>(14959508.31,45247<br>544.23) | 41502151.27<br>(25467889.76,6750<br>2352.55) | 58702355.27<br>(34126981.68,9401<br>0498.83) | 71102874.2<br>(41225733.63,11010<br>0961.2) | 79540652.96<br>(46289643.94,12663<br>1179.7) |
| Brunei<br>Darussalam                   | 1011.78<br>(586.83,1608.21)                | 29.14 (16.07,48.58)                        | 45.54 (23.94,80.18)                         | 84.42 (46.16,139.45)                         | 137.5 (82.5,219.99)                          | 197.14<br>(112.83,310.35)                    | 241.33<br>(142.75,373.52)                   | 276.71<br>(162.58,436.14)                    |
| Bulgaria                               | 254472.6<br>(146824.67,402852.<br>06)      | 4437.85<br>(2377.2,7590.39)                | 6732.89<br>(3492.22,12089.36)               | 13451.21<br>(6977.13,22457.72)               | 27897.35<br>(16616.49,45609.1<br>5)          | 43692.07<br>(24872.64,69939.2<br>2)          | 65569.7<br>(39127.96,100054.0<br>1)         | 92691.52<br>(53361.04,145112.2<br>1)         |
| Burkina Faso                           | 250256.53<br>(146102.12,396877.<br>05)     | 9357.78<br>(5101.91,15797.63)              | 12427.72<br>(6436.65,21931.64)              | 21286.7<br>(11575.14,35976.84)               | 33850.12<br>(20803.34,55371.1<br>4)          | 50247.83<br>(28726.5,80547.91)               | 59658.12<br>(35544.97,89481.8)              | 63428.26<br>(37913.61,97770.1)               |
| Burundi                                | 35203.97<br>(20201.46,57053.34<br>)        | 1280.56<br>(685.24,2176.14)                | 1623.54<br>(847.65,2864.45)                 | 2874.8<br>(1512.84,4892.54)                  | 5252.81<br>(3114.32,8528.87)                 | 7773.48<br>(4383.88,12892.8)                 | 8355.75<br>(4872.27,13006.65)               | 8043.02<br>(4785.25,12691.89)                |
| Cabo Verde                             | 673.16<br>(394.69,1062.42)                 | 15 (8.18,25.32)                            | 23.13 (11.98,40.81)                         | 48.18 (26.2,81.42)                           | 90.5 (55.62,148.04)                          | 140.24<br>(80.18,224.81)                     | 166.58<br>(99.25,249.85)                    | 189.54<br>(113.3,292.16)                     |
| Cambodia                               | 185600.89<br>(106963.44,299328.<br>94)     | 3655.14<br>(2039.02,6148.88)               | 6442.54<br>(3426.24,11327)                  | 14090.9<br>(7485.47,23372.19)                | 24902.14<br>(14860.06,41864.1<br>6)          | 37930.16<br>(21106.77,63372.3<br>2)          | 45183.53<br>(26510.72,68397.95)             | 53396.48<br>(31535.17,84846.43)              |

|                          |                                          |                                          |                                          |                                          |                                       |                                        |                                        |                                       |
|--------------------------|------------------------------------------|------------------------------------------|------------------------------------------|------------------------------------------|---------------------------------------|----------------------------------------|----------------------------------------|---------------------------------------|
| Cameroon                 | 473193.63<br>(276492.62,749760.27)       | 16447.57<br>(8967.3,27766.47)            | 22054.34<br>(11422.53,38920.05)          | 39489.14<br>(21473.13,66740.96)          | 64617.17<br>(39711.91,105699.07)      | 94642.73<br>(54106.91,151713.47)       | 114851.49<br>(68429.79,172266.88)      | 121091.19<br>(72381.04,186653.37)     |
| Canada                   | 27222022.17<br>(15957703.93,42818832.93) | 653399.08<br>(361082.42,1119366.37)      | 1067344.77<br>(563094.33,1857737.23)     | 2071753.01<br>(1127450.19,3444872.74)    | 3473431.84<br>(2069012.31,5566983.75) | 5323211.68<br>(2975374.39,8359130.35)  | 6611600.64<br>(4048189.96,9957258.69)  | 8021281.16<br>(4813500.33,12513483.8) |
| Central African Republic | 6496.83<br>(3760.75,10333.48)            | 235.16<br>(126.8,396.32)                 | 321.25<br>(172.24,564.03)                | 519.33<br>(283.3,850.69)                 | 840.52<br>(505.06,1381.2)             | 1259.02<br>(713.5,2020.7)              | 1593.66<br>(941.45,2417.14)            | 1727.89<br>(1018.4,2703.41)           |
| Chad                     | 75849.7<br>(44250.24,120340.78)          | 3268.63<br>(1782.07,5518.03)             | 4030.8<br>(2087.66,7113.3)               | 6519.22<br>(3544.98,11018.2)             | 9947.74<br>(6113.61,16272.26)         | 14415.92<br>(8241.53,23108.9)          | 18099.64<br>(10783.97,27147.83)        | 19567.75<br>(11696.42,30162.27)       |
| Chile                    | 2399872.93<br>(1390071.24,3762603.34)    | 66961.93<br>(36583.34,112956.06)         | 104480.78<br>(55776.39,184509.35)        | 195495.43<br>(105556.22,319644.2)        | 307221.82<br>(185926.38,498934.47)    | 428934.04<br>(241747.26,670946.51)     | 551728.06<br>(325648.44,838827.38)     | 745050.86<br>(438833.2,1136785.37)    |
| China                    | 6622408432<br>(3861473243,10761597889)   | 62627760.87<br>(33513711.83,106051100.8) | 117269149.8<br>(60888594.96,206427317.6) | 296845899.3<br>(155143018.2,506206771.9) | 764131588.1<br>(454905910,1230492803) | 1135168338<br>(648539477.9,1916484956) | 1514767666<br>(875855550.5,2365991406) | 2731598031<br>(1632626980,4429943533) |
| Colombia                 | 9699512.24<br>(5598843.66,15537184.91)   | 275413.07<br>(148336.93,463475.26)       | 522340.34<br>(271758.12,907228.3)        | 985830.94<br>(527254.86,1630548.3)       | 1340462.49<br>(812707.98,2147275.65)  | 1818183.19<br>(1013628.63,2898654.53)  | 2196319.41<br>(1312687.41,3423602.97)  | 2560962.79<br>(1512469.74,4066399.92) |
| Comoros                  | 289.64<br>(167.16,466.67)                | 7.03 (3.76,11.95)                        | 10.08 (5.26,17.79)                       | 19.73 (10.38,33.58)                      | 35.06 (20.79,56.93)                   | 54.9 (30.96,91.05)                     | 73.78 (43.02,114.85)                   | 89.05 (52.98,140.51)                  |
| Congo                    | 10830.68<br>(6282.51,17173.54)           | 310.33<br>(167.34,523.01)                | 417.16<br>(223.67,732.43)                | 759.14<br>(414.11,1243.5)                | 1318.62<br>(792.35,2166.85)           | 2156.54<br>(1222.13,3461.21)           | 2836.63<br>(1675.73,4302.37)           | 3032.25<br>(1787.17,4744.17)          |
| Cook Islands             | 1.05 (0.61,1.67)                         | 0.02 (0.01,0.03)                         | 0.03 (0.02,0.06)                         | 0.06 (0.03,0.11)                         | 0.1 (0.06,0.16)                       | 0.16 (0.09,0.27)                       | 0.27 (0.16,0.42)                       | 0.4 (0.23,0.62)                       |
| Costa Rica               | 139334.57<br>(80523.3,222995.51)         | 3574.64<br>(1925.29,6015.53)             | 6748.85<br>(3511.23,11721.76)            | 13272.91<br>(7098.78,21953.19)           | 20514.29<br>(12437.59,32861.66)       | 27669.49<br>(15425.6,44112.32)         | 32170.33<br>(19227.44,50146.8)         | 35384.07<br>(20897.36,56184.24)       |

|                                       |                                      |                                 |                                  |                                  |                                   |                                    |                                    |                                    |
|---------------------------------------|--------------------------------------|---------------------------------|----------------------------------|----------------------------------|-----------------------------------|------------------------------------|------------------------------------|------------------------------------|
| Croatia                               | 105134.33<br>(60517.67,166819.76)    | 2036.31<br>(1090.78,3482.87)    | 3676.08<br>(1906.71,6600.66)     | 6838.85<br>(3547.3,11417.94)     | 11291.1<br>(6725.31,18459.73)     | 18930.54<br>(10776.6,30302.67)     | 27093.63<br>(16167.84,41342.72)    | 35267.81<br>(20303.13,55213.17)    |
| Cuba                                  | 1115003.24<br>(647146.91,1781924.71) | 23224.81<br>(12508.83,39083.56) | 45172.82<br>(23502.09,78458.57)  | 84303.73<br>(45088.43,139437)    | 149368.56<br>(90560.6,239272.35)  | 186318.64<br>(103871.8,297040.07)  | 217936.7<br>(130255.5,339717.86)   | 408677.99<br>(241359.65,648915.29) |
| Cyprus                                | 17435.5<br>(10377.17,26536.27)       | 261.83<br>(151.91,434.52)       | 387.57<br>(206.58,659.46)        | 909.95<br>(501.4,1475.35)        | 1977.95<br>(1167.48,3132.25)      | 3604.28<br>(2084.78,5421.6)        | 4787.87<br>(2933.25,7149.14)       | 5506.05<br>(3331.75,8263.94)       |
| Czechia                               | 1295274.03<br>(747507.07,2048353.81) | 21876.49<br>(11718.43,37417.13) | 32076.28<br>(16637.34,57595.06)  | 68975.25<br>(35777.33,115158.98) | 130656<br>(77822.55,213608.47)    | 207939.18<br>(118373.67,332854.33) | 341999.95<br>(204084.7,521864.49)  | 491750.88<br>(283093.06,769855.37) |
| Côte d'Ivoire                         | 535664.17<br>(313239.05,847998.05)   | 16640.16<br>(9072.31,28091.61)  | 23149.54<br>(11989.76,40852.79)  | 42911.05<br>(23333.88,72524.35)  | 73985.38<br>(45469.35,121023.35)  | 111356.35<br>(63662.02,178505.63)  | 132935.77<br>(79204.58,199391.68)  | 134685.92<br>(80507.15,207608.64)  |
| Democratic People's Republic of Korea | 78043.71<br>(45723.6,123147.88)      | 942.56<br>(505.26,1610.8)       | 1930.36<br>(1015.8,3394.98)      | 4599.44<br>(2468.8,7823.54)      | 8184.39<br>(4971.09,13418.02)     | 13204.8<br>(7450.2,21337.45)       | 18740.58<br>(11179.58,28509.46)    | 30441.58<br>(18132.87,47053.64)    |
| Democratic Republic of the Congo      | 1138081.15<br>(658405.21,1811782.02) | 43372.43<br>(23387.8,73097.23)  | 57140.73<br>(30637.59,100324.56) | 96615.99<br>(52704.74,158261.38) | 151796.65<br>(91214.08,249443.31) | 221574.89<br>(125568.17,355622.85) | 271384.21<br>(160318.69,411612.61) | 296196.24<br>(174574.14,463420.07) |
| Denmark                               | 963711.28<br>(575190.48,1491503.03)  | 22690.39<br>(13100.64,38233.35) | 30885.08<br>(16658.07,52391.54)  | 60367.02<br>(33041.53,98087.09)  | 98881.06<br>(59481.45,160623.07)  | 152532.64<br>(88237.93,240911.26)  | 238127.63<br>(143788.03,352418.89) | 360227.47<br>(220882.83,548837.83) |
| Djibouti                              | 387.98<br>(224.02,624.91)            | 7.44 (3.98,12.64)               | 11.27 (5.88,19.89)               | 23.29 (12.25,39.63)              | 50.54 (29.97,82.07)               | 83.52 (47.1,138.53)                | 104.97 (61.21,163.4)               | 106.94<br>(63.62,168.75)           |
| Dominica                              | 7.39 (4.27,11.84)                    | 0.25 (0.13,0.41)                | 0.38 (0.2,0.66)                  | 0.69 (0.37,1.15)                 | 1.07 (0.65,1.71)                  | 1.43 (0.79,2.27)                   | 1.56 (0.93,2.43)                   | 2.02 (1.19,3.21)                   |
| Dominican                             | 429758.35                            | 14117.87                        | 24837.06                         | 45161.05                         | 62884.37                          | 79311.62                           | 94043.37                           | 109403.01                          |

|                   |                                         |                                     |                                    |                                       |                                       |                                        |                                       |                                         |
|-------------------|-----------------------------------------|-------------------------------------|------------------------------------|---------------------------------------|---------------------------------------|----------------------------------------|---------------------------------------|-----------------------------------------|
| Republic          | (247840.86,689077.63)                   | (7603.87,23758.09)                  | (12921.99,43138.34)                | (24153.63,74695.68)                   | (38126.12,100733.9)                   | (44215.85,126443.2)                    | (56207.47,146593.92)                  | (64611.94,173714.51)                    |
| Ecuador           | 882921.28<br>(509108.62,1415455.41)     | 28651.63<br>(15431.71,48216.03)     | 51424.07<br>(26754.42,89316.07)    | 91181.28<br>(48766.76,150812.35)      | 124106.93<br>(75244.69,198805.89)     | 165756.76<br>(92408.64,264259.2)       | 196431.77<br>(117402.55,306196.05)    | 225368.84<br>(133099.84,357849.82)      |
| Egypt             | 36071011.7<br>(21269491.64,56509461.73) | 763067.16<br>(414700.09,1281302.12) | 1200623.77<br>(627463.1,2076346.8) | 2376482.23<br>(1263404.25,3938948.39) | 4442159.67<br>(2708679.63,7253399.99) | 7531711.48<br>(4313938.67,11884585.79) | 9522846.06<br>(5728587.3,14579103.17) | 10234121.34<br>(6212718.61,15495775.46) |
| El Salvador       | 111212.15<br>(64144.51,178303.8)        | 3488.89<br>(1879.11,5871.24)        | 6560.99<br>(3413.49,11395.47)      | 12130.34<br>(6487.71,20063.39)        | 15185.4<br>(9206.74,24325.35)         | 19151.04<br>(10676.62,30531.73)        | 25167.48<br>(15042,39230.86)          | 29528<br>(17438.85,46885.76)            |
| Equatorial Guinea | 3824.88<br>(2213.33,6088.72)            | 130.48<br>(70.36,219.91)            | 183.35<br>(98.31,321.92)           | 326.18<br>(177.93,534.29)             | 535.4<br>(321.72,879.81)              | 784.9<br>(444.81,1259.74)              | 923.64<br>(545.63,1400.89)            | 940.93<br>(554.57,1472.15)              |
| Eritrea           | 5561.49<br>(3203.01,8978.6)             | 154.79<br>(82.83,263.05)            | 217.11<br>(113.35,383.05)          | 411.42<br>(216.51,700.18)             | 718.56<br>(426.02,1166.7)             | 1110.33<br>(626.17,1841.55)            | 1398.24<br>(815.32,2176.52)           | 1551.04<br>(922.8,2447.55)              |
| Estonia           | 13057.96<br>(7524.41,20720.04)          | 249.06<br>(133.42,425.99)           | 379.65<br>(196.92,681.69)          | 813.29<br>(421.85,1357.84)            | 1629.13<br>(970.36,2663.45)           | 2391.89<br>(1361.63,3828.75)           | 3227.31<br>(1925.86,4924.62)          | 4367.63<br>(2514.38,6837.69)            |
| Eswatini          | 3051.3<br>(1766.4,4856.16)              | 91.76<br>(49.48,154.65)             | 137.24<br>(73.58,240.95)           | 263.69<br>(143.85,431.94)             | 440.92<br>(264.95,724.55)             | 643.33<br>(364.58,1032.54)             | 735.73<br>(434.63,1115.89)            | 738.63<br>(435.34,1155.64)              |
| Ethiopia          | 2323976.79<br>(1337139.54,3763233.53)   | 88582.92<br>(47184.24,153635.33)    | 120450.88<br>(63699.51,211020.64)  | 204073.94<br>(107428.8,345489.44)     | 316295.04<br>(186592.46,512875.03)    | 467228.91<br>(262645.89,769443.44)     | 571017.85<br>(333618.5,887293.77)     | 556327.25<br>(335970.13,883475.88)      |
| Fiji              | 1307.62<br>(755.49,2078.7)              | 25.09 (13.55,42.97)                 | 43.84 (23.15,75.76)                | 88.65 (46.59,148.63)                  | 148.99<br>(88.49,238.77)              | 244.52<br>(140.46,399.26)              | 338.67 (200.7,520.7)                  | 417.86<br>(242.55,652.62)               |
| Finland           | 457627.67<br>(274269.5,705533.35)       | 10641.84<br>(6035.93,17551.04)      | 13065.82<br>(7072.1,22603.69)      | 26665.83<br>(14837.57,43459.53)       | 50023.69<br>(30342.61,80682.73)       | 86282.15<br>(50267.57,131603.76)       | 120123.08<br>(72879.21,179864.86)     | 150825.25<br>(92834.52,229767.74)       |
| France            | 72546150.89<br>(42958240.73,1117        | 1836547.01<br>(1022421.85,30030     | 2153758.9<br>(1167440.63,37615     | 3732213.58<br>(2082051.77,600415      | 7300198.06<br>(4454674.42,11565       | 13045640.95<br>(7579082.99,19801       | 18483476.7<br>(11354125.95,27800      | 25994315.68<br>(15298443.12,39851       |

|               |                                              |                                           |                                           |                                            |                                              |                                             |                                              |                                              |
|---------------|----------------------------------------------|-------------------------------------------|-------------------------------------------|--------------------------------------------|----------------------------------------------|---------------------------------------------|----------------------------------------------|----------------------------------------------|
|               | 88812.8)                                     | 04.04)                                    | 12.5)                                     | 8.32)                                      | 767.62)                                      | 982.84)                                     | 962.46)                                      | 425.03)                                      |
| Gabon         | 6786.34<br>(3931.61,10784.43)                | 215.41<br>(116.15,363.03)                 | 308.08<br>(165.19,540.92)                 | 549.87<br>(299.96,900.71)                  | 871.59<br>(523.74,1432.26)                   | 1284.38<br>(727.87,2061.4)                  | 1652.83<br>(976.4,2506.89)                   | 1904.18<br>(1122.3,2979.22)                  |
| Gambia        | 3291.7<br>(1921.38,5220.88)                  | 122.48<br>(66.78,206.78)                  | 166.64<br>(86.31,294.08)                  | 285.83<br>(155.43,483.08)                  | 447.8<br>(275.21,732.5)                      | 653.91<br>(373.84,1048.23)                  | 800.43<br>(476.91,1200.58)                   | 814.59<br>(486.91,1255.63)                   |
| Georgia       | 45395.15<br>(26133.02,72109.79<br>)          | 903.91<br>(484.19,1546.03)                | 1488.1<br>(771.85,2671.99)                | 3067.45<br>(1591.09,5121.33)               | 5690.28<br>(3389.3,9303)                     | 8541.67<br>(4862.52,13672.91)               | 11249.27<br>(6712.87,17165.49)               | 14454.48<br>(8321.2,22629.04)                |
| Germany       | 181640230.1<br>(108078694.6,2768<br>16397.4) | 3532032.61<br>(2049235.09,58615<br>71.34) | 5048792.36<br>(2691102.43,85906<br>38.82) | 9867262.24<br>(5437137.66,159983<br>43.04) | 20428447.19<br>(12057905.88,3235<br>0144.02) | 33902756.44<br>(19610030.78,5099<br>6903.6) | 47871072.84<br>(29327880.26,71480<br>202.66) | 60989866.41<br>(36905402.48,91538<br>593.89) |
| Ghana         | 1128944.54<br>(660901.34,178365<br>9.32)     | 30608.68<br>(16688,51672.98)              | 45962.4<br>(23805.16,81111.4<br>5)        | 88527.7<br>(48138.98,149621.47<br>)        | 145675.68<br>(89528.21,238292.<br>46)        | 221280.98<br>(126505.56,354716<br>.2)       | 284619.37<br>(169579.35,426903.<br>45)       | 312269.72<br>(186656.07,481341.<br>3)        |
| Greece        | 1383790.78<br>(833427.24,211644<br>1.72)     | 25306.93<br>(14096.17,42757.5<br>5)       | 31388.06<br>(16868.24,52844.2<br>9)       | 57117.66<br>(30694.84,90480.16)            | 114865.7<br>(70623.12,178761.<br>53)         | 237652.44<br>(136466.38,366308<br>.32)      | 393470.81<br>(237305.33,576922.<br>5)        | 523989.19<br>(327373.16,808367.<br>38)       |
| Greenland     | 43.15 (25.15,68.24)                          | 1.38 (0.76,2.36)                          | 2.16 (1.14,3.76)                          | 4.2 (2.28,6.98)                            | 6.82 (4.06,10.93)                            | 9.15 (5.12,14.38)                           | 9.23 (5.65,13.9)                             | 10.21 (6.13,15.93)                           |
| Grenada       | 27.83 (16.07,44.6)                           | 0.82 (0.44,1.39)                          | 1.59 (0.83,2.75)                          | 2.88 (1.54,4.77)                           | 3.71 (2.25,5.94)                             | 4.52 (2.52,7.2)                             | 5.83 (3.49,9.09)                             | 8.48 (5.01,13.46)                            |
| Guam          | 66.3 (38.32,105.18)                          | 1.14 (0.61,1.95)                          | 2.05 (1.08,3.54)                          | 4.22 (2.22,7.07)                           | 6.66 (3.96,10.67)                            | 10.59 (6.09,17.3)                           | 15.8 (9.36,24.29)                            | 25.84 (15,40.36)                             |
| Guatemala     | 463353.14<br>(266378.33,744472.<br>39)       | 19422.65<br>(10461.01,32685.1<br>6)       | 32671.33<br>(16997.93,56745.2<br>9)       | 52748.28<br>(28211.52,87244.81)            | 67178.9<br>(40729.85,107613.<br>34)          | 84554.87<br>(47138.94,134802.<br>29)        | 101466.77<br>(60644.23,158165.4<br>5)        | 105310.35<br>(62194.85,167216.0<br>5)        |
| Guinea        | 89845.76<br>(52493.65,142425.8<br>8)         | 3146.06<br>(1715.25,5311.12)              | 4222.15<br>(2186.76,7450.97)              | 7637.99<br>(4153.33,12909.04)              | 12588.81<br>(7736.73,20592.46)               | 17914.63<br>(10241.73,28717.3<br>7)         | 21581.5<br>(12858.49,32370.31)               | 22754.62<br>(13601.34,35074.61)              |
| Guinea-Bissau | 3323.61<br>(1942.34,5266.71)                 | 110.07<br>(60.01,185.82)                  | 149.37<br>(77.36,263.6)                   | 279.22<br>(151.83,471.92)                  | 468.15<br>(287.71,765.78)                    | 685.39<br>(391.83,1098.68)                  | 814.18<br>(485.1,1221.2)                     | 817.24<br>(488.5,1259.72)                    |
| Guyana        | 1296.89                                      | 43.67 (23.52,73.48)                       | 82.35                                     | 148.98                                     | 173.88                                       | 216.8                                       | 288.57                                       | 342.64                                       |

|                            |                                          |                                          |                                          |                                          |                                          |                                          |                                          |                                          |
|----------------------------|------------------------------------------|------------------------------------------|------------------------------------------|------------------------------------------|------------------------------------------|------------------------------------------|------------------------------------------|------------------------------------------|
|                            | (747.16,2080.98)                         |                                          | (42.84,143.03)                           | (79.68,246.42)                           | (105.42,278.54)                          | (120.86,345.63)                          | (172.47,449.83)                          | (202.36,544.06)                          |
| Haiti                      | 68896.38<br>(39689.36,110508.52)         | 2532.46<br>(1363.98,4261.72)             | 3999.37<br>(2080.75,6946.32)             | 7179.77<br>(3839.98,11875.23)            | 10778.58<br>(6534.94,17266.11)           | 14008.25<br>(7809.53,22332.77)           | 15171.94<br>(9067.91,23649.89)           | 15226.01<br>(8992.27,24176.48)           |
| Honduras                   | 137639.98<br>(79123.27,221173.53)        | 5659.49<br>(3048.19,9524)                | 9498.83<br>(4941.96,16498.07)            | 16062.75<br>(8590.88,26567.52)           | 20788.47<br>(12603.83,33300.88)          | 25402.08<br>(14161.54,40497.48)          | 29172.27<br>(17435.56,45473.48)          | 31056.09<br>(18341.3,49312.09)           |
| Hungary                    | 713449.1<br>(411437.68,1128601.17)       | 12707.6<br>(6806.99,21734.83)            | 20268.53<br>(10512.89,36393.5)           | 41733.14<br>(21646.93,69676.38)          | 67926.72<br>(40459.14,111052.95)         | 108933.46<br>(62012.56,174372.88)        | 194849.98<br>(116274.54,297325.25)       | 267029.67<br>(153724.63,418045.37)       |
| Iceland                    | 2578.16<br>(1532.01,3936.19)             | 63.68<br>(36.95,105.68)                  | 83.32<br>(44.41,141.76)                  | 165.27<br>(91.07,267.96)                 | 283.89<br>(167.57,449.57)                | 460.05<br>(266.1,692.02)                 | 659.27<br>(403.9,984.42)                 | 862.68<br>(522.02,1294.79)               |
| India                      | 1069689005<br>(618180042,1734047516)     | 30425150.69<br>(16564637.92,51603287.13) | 44118445.16<br>(22955741.73,77268696.65) | 79200216.88<br>(41383028.45,134648274.6) | 131474255.4<br>(77805650.72,212425474.4) | 204704364.1<br>(119074697.8,330391461.7) | 264814819.6<br>(155461072.2,410711475.9) | 314951752.8<br>(184935213.1,516998846.1) |
| Indonesia                  | 109662459.7<br>(62875429.77,177605430.2) | 1840209.21<br>(982547.37,3085091.5)      | 3402151.4<br>(1802637.67,6026760.26)     | 6876161.91<br>(3561778.67,11692710.11)   | 11975910.99<br>(6896371.36,19452734.07)  | 19420850.25<br>(10840049.18,31555658.12) | 28725403.84<br>(16735056.3,44730305.26)  | 37421772.09<br>(22056989.23,61062170.93) |
| Iran (Islamic Republic of) | 65168163.39<br>(38107643.26,102943073.4) | 789930.96<br>(432959.21,1336347.56)      | 1296401.92<br>(696082.69,2284883.34)     | 3143349.05<br>(1644843.38,5353909.72)    | 7830780.94<br>(4694818.44,12572698.21)   | 14894529.09<br>(8569309.69,24185525.79)  | 18262168.7<br>(10860275.81,27917002.98)  | 18951002.73<br>(11209354.04,29292705.79) |
| Iraq                       | 4348844.03<br>(2566137.99,6810309.95)    | 100688.11<br>(54720.44,169070.18)        | 152995.07<br>(79957.39,264588.17)        | 299460.63<br>(159201.64,496347.07)       | 535777.39<br>(326699.04,874846.51)       | 795910.42<br>(455873.67,1255898.6)       | 1112623.98<br>(669312.91,1703383.58)     | 1351388.43<br>(820372.89,2046175.83)     |
| Ireland                    | 741193.19<br>(441810.68,1127326.84)      | 17079.8<br>(9909.48,28344.69)            | 19630.35<br>(10463.34,33401.47)          | 32706.83<br>(18022.39,53029.45)          | 65904.41<br>(38900.15,104364.99)         | 137984.26<br>(79812.76,207557.29)        | 209724.89<br>(128486.49,313157.19)       | 258162.65<br>(156216.07,387471.76)       |
| Israel                     | 1079657.23<br>(641249.04,164942)         | 33915.58<br>(19677.37,56284.4)           | 38948.83<br>(20760.48,66272.3)           | 64816.35<br>(35715.61,105090.34)         | 114120.76<br>(67359.92,180719.9)         | 197665.42<br>(114333.59,297330)          | 274600.23<br>(168231.99,410028.9)        | 355590.05<br>(215170.07,533698.9)        |

|                                        |                                              |                                           |                                           |                                             |                                              |                                              |                                              |                                              |
|----------------------------------------|----------------------------------------------|-------------------------------------------|-------------------------------------------|---------------------------------------------|----------------------------------------------|----------------------------------------------|----------------------------------------------|----------------------------------------------|
|                                        | 4.13)                                        | 9)                                        | 4)                                        | )                                           | 79)                                          | .63)                                         | 05)                                          | 5)                                           |
| Italy                                  | 66283646.8<br>(38903014.91,1044<br>97136.3)  | 1288144.72<br>(702526.19,221506<br>5.96)  | 1682440.51<br>(869596.4,3127944<br>.74)   | 3071409.35<br>(1683717.68,505846<br>0.27)   | 5642482.52<br>(3373082.48,93300<br>22.79)    | 10141223.4<br>(5741106.9,159583<br>06.25)    | 17160508.83<br>(10382317.04,25868<br>837.68) | 27297437.47<br>(16150668.22,42938<br>498.66) |
| Jamaica                                | 18962.31<br>(10933.97,30400.37<br>)          | 552.29<br>(297.46,929.41)                 | 1058.63<br>(550.77,1838.69)               | 2038.6<br>(1090.31,3371.81)                 | 2785.44<br>(1688.78,4461.97)                 | 3632.98<br>(2025.37,5791.91)                 | 4002.54<br>(2392.23,6239.14)                 | 4891.82<br>(2889.04,7767.44)                 |
| Japan                                  | 244172126.2<br>(141307065.9,3901<br>27545.9) | 5507592.25<br>(2970418.39,95177<br>57.64) | 8283497.96<br>(4326736.6,149897<br>50.88) | 14023874.64<br>(7576288.32,231798<br>90.55) | 22306791.52<br>(13484094.29,3630<br>0621.63) | 38719102.02<br>(22078642.14,6225<br>2897.13) | 60686267.76<br>(35477283.18,93347<br>192.87) | 94645000.08<br>(55393602.94,15053<br>9435.2) |
| Jordan                                 | 591603.32<br>(348968.16,925933.<br>61)       | 14114.27<br>(7670.61,23699.94)            | 20686.74<br>(10811.18,35775.4<br>4)       | 38576.34<br>(20508.26,63939.13)             | 66541.19<br>(40574.6,108652.1<br>1)          | 114785.65<br>(65745.78,181124.<br>84)        | 156460.4<br>(94120.72,239534.6<br>8)         | 180438.74<br>(109537.02,273207.<br>46)       |
| Kazakhstan                             | 1018594.24<br>(585290.27,162271<br>2.67)     | 25640.88<br>(13734.87,43855.6<br>3)       | 36680.58<br>(19025.47,65862.4)            | 81978.65<br>(42522.21,136869.06<br>)        | 145003.15<br>(86368.15,237064.<br>5)         | 193551.84<br>(110183.37,309824<br>.14)       | 239364.35<br>(142837.97,365250.<br>67)       | 296374.79<br>(170618.23,463986.<br>27)       |
| Kenya                                  | 1704586.71<br>(982218.38,275817<br>9.81)     | 61005.28<br>(32494.82,105805.<br>54)      | 82509.95<br>(43634.74,144551.<br>06)      | 141804.11<br>(74648.65,240068.96<br>)       | 229843.42<br>(135591.91,372693<br>.04)       | 344242.8<br>(193511.07,566907<br>.06)        | 410782.7<br>(240000.76,638307.<br>39)        | 434398.46<br>(262336.42,689846.<br>75)       |
| Kiribati                               | 10.82 (6.24,17.25)                           | 0.24 (0.13,0.41)                          | 0.42 (0.22,0.73)                          | 0.86 (0.45,1.44)                            | 1.4 (0.83,2.24)                              | 2.05 (1.18,3.34)                             | 2.73 (1.62,4.2)                              | 3.12 (1.81,4.88)                             |
| Kuwait                                 | 539393.97<br>(319701.14,841089.<br>66)       | 4068.06<br>(2210.84,6830.86)              | 8138.19<br>(4253.15,14074.11)             | 24488.42<br>(13018.72,40588.85)             | 66497.73<br>(40548.1,108581.1<br>4)          | 125258.59<br>(71744.37,197650.<br>48)        | 151887.46<br>(91369.8,232533.7)              | 159055.52<br>(96556.15,240830.5<br>2)        |
| Kyrgyzstan                             | 48498.37<br>(27750.16,77643.72<br>)          | 1574.89<br>(843.61,2693.66)               | 2477.58<br>(1285.07,4448.66)              | 4822.84<br>(2501.6,8052.07)                 | 7414.97<br>(4416.58,12122.68)                | 8984.57<br>(5114.65,14381.88)                | 10412.71<br>(6213.67,15888.95)               | 12810.81<br>(7374.98,20055.82)               |
| Lao People's<br>Democratic<br>Republic | 28497.28<br>(16421.4,45966.75)               | 613.34<br>(342.15,1031.79)                | 1096.64<br>(583.21,1928.07)               | 2231.23<br>(1185.29,3700.87)                | 3805.3<br>(2270.76,6397.27)                  | 5529.69<br>(3077.07,9238.8)                  | 6863.46<br>(4027.02,10389.77)                | 8357.63<br>(4935.89,13280.18)                |

|            |                                       |                               |                                   |                                   |                                    |                                     |                                    |                                     |
|------------|---------------------------------------|-------------------------------|-----------------------------------|-----------------------------------|------------------------------------|-------------------------------------|------------------------------------|-------------------------------------|
| Latvia     | 22229.45<br>(12810.59,35251.95)<br>)  | 415.94<br>(222.81,711.42)     | 593.47<br>(307.82,1065.62)        | 1355.28<br>(702.98,2262.74)       | 2677.93<br>(1595.06,4378.14)       | 4001.48<br>(2277.93,6405.28)        | 5386.97<br>(3214.61,8220.09)       | 7798.38<br>(4489.39,12208.67)       |
| Lebanon    | 301785.57<br>(178625.49,471523.71)    | 3813.12<br>(2072.29,6402.78)  | 5937.29<br>(3102.92,10267.91)     | 18255.08<br>(9704.91,30257.27)    | 40104<br>(24454.06,65483.98)       | 62032.23<br>(35530.2,97883.09)      | 79481.18<br>(47812.91,121682.6)    | 92162.66<br>(55948.19,139546.09)    |
| Lesotho    | 5262.38<br>(3045.84,8371.6)           | 173.02<br>(93.3,291.59)       | 253.29<br>(135.81,444.72)         | 452.32<br>(246.74,740.92)         | 711.1<br>(427.3,1168.53)           | 1044.68<br>(592.03,1676.69)         | 1305.99<br>(771.51,1980.82)        | 1321.98<br>(779.16,2068.33)         |
| Liberia    | 22730.98<br>(13299.37,35886.13)<br>)  | 723.31<br>(394.35,1221.08)    | 948.46<br>(491.23,1673.77)        | 1653.2<br>(898.97,2794.09)        | 2618.95<br>(1609.54,4284.02)       | 4522.81<br>(2585.68,7250.13)        | 5814.63<br>(3464.42,8721.41)       | 6449.62<br>(3855.19,9941.62)        |
| Libya      | 395128.43<br>(234016.19,615834.26)    | 5856.53<br>(3182.81,9833.96)  | 9585.11<br>(5009.31,16576.39)     | 20259.62<br>(10770.57,33579.71)   | 40874.37<br>(24923.8,66741.9)      | 77252.39<br>(44247.86,121899.61)    | 109485.52<br>(65862.37,167618.05)  | 131814.89<br>(80019.46,199584.65)   |
| Lithuania  | 59944.71<br>(34468.09,95211.72)<br>)  | 1124.32<br>(602.26,1923.02)   | 2084.59<br>(1081.23,3743.01)      | 4358.91<br>(2260.96,7277.51)      | 6925.22<br>(4124.86,11321.97)      | 9870.81<br>(5619.14,15800.48)       | 14071.11<br>(8396.78,21471.38)     | 21509.76<br>(12382.85,33674.36)     |
| Luxembourg | 12914.91<br>(7686.18,19674.06)        | 231.84<br>(134.51,384.74)     | 333.46<br>(177.74,567.39)         | 726.86<br>(400.52,1178.51)        | 1417.98<br>(836.97,2245.48)        | 2404.85<br>(1391.02,3617.42)        | 3403.21<br>(2084.94,5081.59)       | 4396.71<br>(2660.48,6598.92)        |
| Madagascar | 141340.67<br>(81298.34,228434.11)     | 4680.55<br>(2504.6,7953.92)   | 6207.16<br>(3240.73,10951.41)     | 11021.34<br>(5799.89,18756.87)    | 18262.87<br>(10827.79,29653.02)    | 27534.09<br>(15527.95,45667)        | 34767.34<br>(20272.99,54119.23)    | 38867.32<br>(23124.38,61332.66)     |
| Malawi     | 105752<br>(60693.39,171268.09)        | 4194.95<br>(2244.76,7128.72)  | 5196.18<br>(2712.9,9167.72)       | 8399.51<br>(4420.18,14294.86)     | 14605.73<br>(8659.52,23715)        | 21891.92<br>(12346.03,36309.1)      | 26044.34<br>(15186.57,40540.91)    | 25419.37<br>(15123.42,40111.79)     |
| Malaysia   | 3566074.17<br>(2056694.94,5744574.72) | 63786.41<br>(35583.14,107305) | 123400.17<br>(65626.09,216957.11) | 261095.3<br>(138700.74,433071.52) | 456572.21<br>(272453.87,767564.72) | 701848.77<br>(390553.39,1172623.26) | 882436.1<br>(517755.69,1335815.07) | 1076935.2<br>(636022.02,1711238.02) |
| Maldives   | 1606.49                               | 21.07 (11.75,35.44)           | 39.45 (20.98,69.35)               | 102.73                            | 220.98                             | 354.96                              | 413.06                             | 454.25                              |

|                                  |                                         |                                       |                                       |                                     |                                         |                                         |                                          |                                          |
|----------------------------------|-----------------------------------------|---------------------------------------|---------------------------------------|-------------------------------------|-----------------------------------------|-----------------------------------------|------------------------------------------|------------------------------------------|
|                                  | (927.32,2586.82)                        |                                       |                                       | (54.57,170.39)                      | (131.87,371.5)                          | (197.53,593.06)                         | (242.36,625.28)                          | (268.27,721.79)                          |
| Mali                             | 168917.81<br>(98528.92,268086.63)       | 7012<br>(3822.98,11837.52)            | 9078.13<br>(4701.81,16020.5)          | 14980.48<br>(8145.98,25318.64)      | 22472.69<br>(13811.09,36760.23)         | 32216.49<br>(18418.06,51643.44)         | 40363.35<br>(24048.94,60541.4)           | 42794.67<br>(25580.08,65964.91)          |
| Malta                            | 4196.39<br>(2498.85,6389.26)            | 73.27 (42.51,121.6)                   | 104.73<br>(55.82,178.2)               | 222.97<br>(122.86,361.51)           | 453.36<br>(267.6,717.94)                | 772.33<br>(446.72,1161.74)              | 1112.65<br>(681.66,1661.38)              | 1457.08<br>(881.68,2186.89)              |
| Marshall Islands                 | 5.33 (3.08,8.48)                        | 0.12 (0.06,0.2)                       | 0.2 (0.1,0.34)                        | 0.36 (0.19,0.6)                     | 0.61 (0.36,0.98)                        | 1 (0.57,1.63)                           | 1.39 (0.82,2.13)                         | 1.66 (0.96,2.59)                         |
| Mauritania                       | 16493.04<br>(9641.69,26092.45)          | 588.39<br>(320.79,993.31)             | 766.65<br>(397.07,1352.94)            | 1318.13<br>(716.76,2227.78)         | 2064.4<br>(1268.72,3376.89)             | 3091.64<br>(1767.48,4955.94)            | 4072.23<br>(2426.28,6107.98)             | 4591.6<br>(2744.58,7077.61)              |
| Mauritius                        | 7579.17<br>(4388.63,12126.51)           | 108.44<br>(60.49,182.42)              | 202.76<br>(107.83,356.48)             | 443.29<br>(235.49,735.28)           | 744.16<br>(444.07,1251.05)              | 1232.8<br>(686.01,2059.71)              | 2146.17<br>(1259.23,3248.83)             | 2701.56<br>(1595.51,4292.76)             |
| Mexico                           | 78099999.49<br>(45231925.5,124889032.5) | 2450612.47<br>(1347204.57,4138807.74) | 4122934.93<br>(2192842.49,7224940.12) | 7314007.08<br>(3824065,12404283.39) | 10453306.23<br>(6175484.19,17025647.84) | 14254445.46<br>(8263013.39,22989211.63) | 17734374.37<br>(10617081.17,27051328.13) | 21770318.96<br>(12812234.68,34054813.62) |
| Micronesia (Federated States of) | 4.18 (2.41,6.65)                        | 0.1 (0.06,0.18)                       | 0.17 (0.09,0.3)                       | 0.31 (0.16,0.53)                    | 0.48 (0.28,0.77)                        | 0.71 (0.41,1.15)                        | 1 (0.59,1.54)                            | 1.4 (0.81,2.19)                          |
| Monaco                           | 17.59 (10.5,26.74)                      | 0.35 (0.2,0.58)                       | 0.44 (0.23,0.75)                      | 0.79 (0.43,1.28)                    | 1.54 (0.91,2.44)                        | 2.85 (1.65,4.29)                        | 4.84 (2.97,7.23)                         | 6.79 (4.11,10.18)                        |
| Mongolia                         | 24404.75<br>(14018.73,38902.36)         | 605.98<br>(324.6,1036.46)             | 983.57<br>(510.16,1766.06)            | 1951.49<br>(1012.24,3258.16)        | 3504.58<br>(2087.43,5729.61)            | 4619.5<br>(2629.74,7394.57)             | 5726.48<br>(3417.21,8738.14)             | 7013.15<br>(4037.36,10979.37)            |
| Montenegro                       | 2147.38<br>(1235.01,3410.7)             | 49.31 (26.41,84.34)                   | 80.96<br>(41.99,145.37)               | 145.68<br>(75.57,243.23)            | 231.67<br>(137.99,378.76)               | 387.39<br>(220.53,620.1)                | 548.47<br>(327.29,836.92)                | 703.9<br>(405.22,1101.97)                |
| Morocco                          | 3955876.14<br>(2340335.1,6175708.21)    | 66781.25<br>(36293.24,112135.52)      | 107223.49<br>(56036.51,185431.23)     | 225561.94<br>(119915,373862.14)     | 445894.82<br>(271891.68,728081.35)      | 761922.95<br>(436406.7,1202268.47)      | 1070041.5<br>(643696.84,1638191.52)      | 1278450.19<br>(776095.12,1935737.99)     |
| Mozambique                       | 249248.45<br>(143112.12,403424.         | 9352.89<br>(5004.82,15893.91)         | 12402.89<br>(6475.5,21882.67)         | 21278.43<br>(11197.6,36213.08)      | 31928.28<br>(18929.81,51841.2)          | 47754.63<br>(26931.41,79204.0)          | 59708.11<br>(34816.07,92942.32)          | 66823.21<br>(39756.92,105447.0)          |

|                 |                                              |                                          |                                           |                                          |                                          |                                           |                                            |                                            |
|-----------------|----------------------------------------------|------------------------------------------|-------------------------------------------|------------------------------------------|------------------------------------------|-------------------------------------------|--------------------------------------------|--------------------------------------------|
|                 | 33)                                          |                                          |                                           |                                          | 5)                                       | 3)                                        |                                            | 7)                                         |
| Myanmar         | 2173205.93<br>(1255570.68,34911<br>25.23)    | 41998.2<br>(23428.61,70651.6<br>8)       | 73160.59<br>(38907.93,128627.<br>97)      | 140091.52<br>(74420.37,232365.94<br>)    | 238803.18<br>(142502.9,401463.<br>16)    | 387714.01<br>(215748.83,647778<br>.32)    | 556366.82<br>(326439.56,842217.<br>48)     | 735071.6<br>(434122.48,1168020<br>.69)     |
| Namibia         | 21661.85<br>(12556.86,34406.05<br>)          | 612.53<br>(330.3,1032.33)                | 899.46<br>(482.27,1579.23)                | 1731.46<br>(944.53,2836.21)              | 2869.99<br>(1724.57,4716.17)             | 4236.12<br>(2400.64,6798.89)              | 5341.47<br>(3155.45,8101.49)               | 5970.8<br>(3519.11,9341.74)                |
| Nauru           | 0.36 (0.21,0.57)                             | 0.01 (0,0.02)                            | 0.02 (0.01,0.03)                          | 0.03 (0.02,0.05)                         | 0.05 (0.03,0.08)                         | 0.07 (0.04,0.11)                          | 0.09 (0.05,0.13)                           | 0.1 (0.06,0.16)                            |
| Nepal           | 317115.46<br>(181740.62,510559.<br>35)       | 9712.48<br>(5107.81,16631.39)            | 14110.27<br>(7526.57,24662.8)             | 25057.56<br>(13331.08,41862.3)           | 40391.08<br>(23747.59,66159.6<br>7)      | 60811.67<br>(34436.35,99804.9<br>6)       | 77738.76<br>(45530.08,120777.1<br>2)       | 89293.64<br>(52061.15,140661.1<br>2)       |
| Netherlands     | 5523040.14<br>(3288147.27,86010<br>66.96)    | 133852.85<br>(75014.4,224711.4<br>4)     | 174827.14<br>(95796.23,307243.<br>08)     | 323762.5<br>(178042.96,521504.5<br>1)    | 580254.64<br>(355287.54,895199<br>.99)   | 941869.11<br>(535432.49,144855<br>0.32)   | 1346811.69<br>(822831.65,2046004<br>.42)   | 2021662.22<br>(1225742.01,315785<br>3.2)   |
| New Zealand     | 126344.58<br>(67959.56,215514.4<br>1)        | 4548.53<br>(2332.73,8218.86)             | 6224.08<br>(2948.25,12125.56)             | 10825.82<br>(5305.32,19211.19)           | 16135.43<br>(9009.42,28620.51)           | 20880.37<br>(11147.94,34683.5<br>9)       | 27849.64<br>(15869.23,43999.13)            | 39880.72<br>(21346.67,68655.56)            |
| Nicaragua       | 74228.14<br>(42783.74,119036.9<br>1)         | 2523.72<br>(1359.27,4247.01)             | 4296.14<br>(2235.15,7461.76)              | 7883.77<br>(4216.5,13039.62)             | 11133.63<br>(6750.2,17834.87)            | 14272.66<br>(7956.94,22754.32)            | 16350.86<br>(9772.51,25487.57)             | 17767.36<br>(10493.17,28211.75)            |
| Niger           | 139149.79<br>(81094.02,220851.8<br>5)        | 6639.3<br>(3619.78,11208.34)             | 7973.8<br>(4129.84,14071.64)              | 12417.14<br>(6752.11,20986.31)           | 17081.18<br>(10497.62,27940.9<br>4)      | 24927.62<br>(14251.04,39959.2<br>9)       | 33367.12<br>(19880.5,50047.68)             | 36743.63<br>(21963.13,56637.66)            |
| Nigeria         | 42853531.98<br>(24919297.66,6888<br>5999.93) | 1739087.11<br>(969684.74,291680<br>0.39) | 2291135.88<br>(1214750.85,40854<br>38.01) | 3709940.75<br>(2012759.87,621995<br>1.6) | 5322469.59<br>(3253811.09,85510<br>40.6) | 7807783.63<br>(4519488.4,125932<br>74.46) | 10186439.14<br>(6050586.7,1562818<br>3.72) | 11796675.9<br>(6898216.01,188913<br>11.15) |
| Niue            | 0.01 (0,0.01)                                | 0 (0,0)                                  | 0 (0,0)                                   | 0 (0,0)                                  | 0 (0,0)                                  | 0 (0,0)                                   | 0 (0,0)                                    | 0 (0,0)                                    |
| North Macedonia | 17893.19<br>(10297.91,28414.61)              | 336.84<br>(180.43,576.12)                | 609.36<br>(316.06,1094.14)                | 1265.61<br>(656.47,2113.02)              | 2116.91<br>(1260.89,3460.92)             | 3293.9<br>(1875.12,5272.64)               | 4574.31<br>(2729.67,6980.03)               | 5696.28<br>(3279.26,8917.75)               |

|                          |                                         |                                    |                                     |                                      |                                       |                                       |                                      |                                      |
|--------------------------|-----------------------------------------|------------------------------------|-------------------------------------|--------------------------------------|---------------------------------------|---------------------------------------|--------------------------------------|--------------------------------------|
|                          | )                                       |                                    |                                     |                                      |                                       |                                       |                                      |                                      |
| Northern Mariana Islands | 4.08 (2.36,6.45)                        | 0.06 (0.03,0.1)                    | 0.1 (0.05,0.18)                     | 0.18 (0.09,0.29)                     | 0.34 (0.2,0.55)                       | 0.62 (0.35,1.01)                      | 0.7 (0.42,1.08)                      | 2.08 (1.21,3.24)                     |
| Norway                   | 672918.46<br>(390644.44,1063003.38)     | 16447.37<br>(9209.51,27598.68)     | 22328.66<br>(11965.83,39766.32)     | 41676.68<br>(22671.46,67889.45)      | 74716.58<br>(45159.93,119332.91)      | 115798.11<br>(65899.87,186621.89)     | 164167.77<br>(96272.58,250839.17)    | 237783.28<br>(139465.26,370954.96)   |
| Oman                     | 141440.77<br>(83512.08,221651.02)       | 1989.13<br>(1081.03,3340.04)       | 3237.97<br>(1692.21,5599.72)        | 8900.95<br>(4732,14753.06)           | 20602.97<br>(12563,33641.62)          | 32647.01<br>(18699.24,51515.03)       | 39272.08<br>(23624.6,60123.98)       | 34790.67<br>(21120.01,52677.57)      |
| Pakistan                 | 15728554.24<br>(9083445.12,25556849.85) | 535953.92<br>(292096.98,907035.21) | 738872.56<br>(384589.64,1286664.29) | 1335180.32<br>(698031.85,2266907.89) | 2083938.24<br>(1244142.78,3378157.15) | 3009904.42<br>(1743408.29,4902074.87) | 3799662.8<br>(2235366.17,5889243.84) | 4225041.99<br>(2485809.41,6926766.6) |
| Palau                    | 1.9 (1.1,2.99)                          | 0.03 (0.01,0.04)                   | 0.04 (0.02,0.07)                    | 0.07 (0.04,0.12)                     | 0.14 (0.08,0.22)                      | 0.27 (0.15,0.44)                      | 0.51 (0.3,0.78)                      | 0.85 (0.49,1.33)                     |
| Palestine                | 26084.93<br>(15345.91,40976.29)         | 694.99<br>(377.7,1166.99)          | 1068.32<br>(558.32,1847.55)         | 2110.19<br>(1121.84,3497.58)         | 3447.66<br>(2102.27,5629.53)          | 4944.91<br>(2832.3,7802.78)           | 6437.03<br>(3872.28,9854.84)         | 7381.82<br>(4481.2,11177.02)         |
| Panama                   | 133804.28<br>(77235.59,214374.81)       | 4237.17<br>(2282.13,7130.46)       | 7537.32<br>(3921.44,13091.21)       | 12904.46<br>(6901.73,21343.77)       | 17889.89<br>(10846.43,28657.64)       | 24528.37<br>(13674.46,39104.58)       | 30055.06<br>(17963.21,46849.59)      | 36652<br>(21646.19,58197.56)         |
| Papua New Guinea         | 30339.7<br>(17492.01,48358.03)          | 676.57<br>(365.37,1158.44)         | 1248.11<br>(659.11,2156.84)         | 2466.34<br>(1296.16,4134.99)         | 3943.89<br>(2342.48,6320.71)          | 5640.35<br>(3239.99,9209.7)           | 7422.25<br>(4398.4,11411.36)         | 8942.19<br>(5190.49,13966)           |
| Paraguay                 | 162967.76<br>(93919.96,258686.22)       | 5647.72<br>(3096.74,9810.49)       | 9649.5<br>(5118.1,16906.92)         | 18199.65<br>(9613.57,30045.39)       | 26259.91<br>(16057.83,42395.95)       | 31902.22<br>(18402.2,50445.22)        | 34402.05<br>(20404.71,52049.17)      | 36906.71<br>(21226.81,57033.08)      |
| Peru                     | 2909434.49<br>(1679836.01,4660108.98)   | 82095.63<br>(44216.54,138153.56)   | 153053.44<br>(79629.15,265831.31)   | 294879.3<br>(157711.13,487725.51)    | 419674.92<br>(254444.41,672273.75)    | 550897.2<br>(307122.63,878272.63)     | 659267.22<br>(394028.27,1027659.86)  | 749566.79<br>(442683.89,1190192.36)  |

|                        |                                              |                                           |                                           |                                            |                                            |                                              |                                              |                                              |
|------------------------|----------------------------------------------|-------------------------------------------|-------------------------------------------|--------------------------------------------|--------------------------------------------|----------------------------------------------|----------------------------------------------|----------------------------------------------|
| Philippines            | 15728675.7<br>(8983792.4,255265<br>10.29)    | 366212.89<br>(195532.95,613952<br>.07)    | 637833.53<br>(337957.56,112989<br>3.7)    | 1228234.33<br>(636212.36,2088576.<br>34)   | 1925764.83<br>(1108958.49,31280<br>61.75)  | 2809225.96<br>(1568013.1,456452<br>5.94)     | 3952979.96<br>(2302956.15,615545<br>7.63)    | 4808424.19<br>(2834161.79,784604<br>2.87)    |
| Poland                 | 13484316.67<br>(7757729.38,21625<br>596.17)  | 228559.46<br>(127322.3,380801.<br>8)      | 397292.39<br>(204784.53,702989<br>.29)    | 848647.14<br>(453676.14,1454960.<br>59)    | 1516512.4<br>(907564.2,2468137<br>.8)      | 2647105.04<br>(1530610.23,42590<br>07.36)    | 3582523.84<br>(2064356.1,5521152<br>.85)     | 4263676.4<br>(2469415.87,683854<br>6.48)     |
| Portugal               | 1678150.38<br>(1002238.7,254876<br>4.33)     | 31095.21<br>(18041.02,51603.9<br>6)       | 40463.49<br>(21567.82,68849.5<br>6)       | 71009.34<br>(39128.11,115131.39<br>)       | 134701.63<br>(79507.8,213311.3<br>5)       | 269749.61<br>(156028.48,405760<br>.32)       | 465762.12<br>(285345.91,695467.<br>37)       | 665368.97<br>(402619.57,998640.<br>38)       |
| Puerto Rico            | 49786.84<br>(28871.66,79529.02<br>)          | 1201.18<br>(646.96,2021.4)                | 2135.76<br>(1111.18,3709.5)               | 3910.96<br>(2091.71,6468.66)               | 5991.49<br>(3632.57,9597.72)               | 8511.15<br>(4744.93,13568.97)                | 12198.16<br>(7290.56,19014.38)               | 15838.13<br>(9353.77,25148.39)               |
| Qatar                  | 119030.77<br>(70391.74,186420.8<br>9)        | 1081.15<br>(587.57,1815.4)                | 1770.58<br>(925.34,3062.04)               | 6887.11<br>(3661.37,11415.16)              | 18790.37<br>(11457.75,30681.9<br>5)        | 29095.96<br>(16665.31,45911.7)               | 33189.99<br>(19965.87,50812.59)              | 28215.61<br>(17128.54,42722.05)              |
| Republic of<br>Korea   | 27086928.69<br>(15759473.63,4289<br>8572.64) | 504790.86<br>(278394.22,841495<br>.28)    | 920687.88<br>(484012.9,1621082<br>.12)    | 1784023.26<br>(975437.81,2946726.<br>49)   | 2631196.87<br>(1578755.59,42098<br>63.72)  | 4473137.4<br>(2560234.32,70418<br>48.76)     | 7015478.04<br>(4149708.17,108582<br>84.88)   | 9757614.38<br>(5732930.63,153792<br>71.4)    |
| Republic of<br>Moldova | 32997.44<br>(19019.67,52354.61<br>)          | 529.11<br>(283.43,904.98)                 | 895.27<br>(464.36,1607.52)                | 2101.64<br>(1090.12,3508.83)               | 4185.69<br>(2493.12,6843.15)               | 6608.56<br>(3762.06,10578.51)                | 8284.58<br>(4943.74,12641.61)                | 10392.59<br>(5982.86,16270.01)               |
| Romania                | 2185758.42<br>(1260912.55,34603<br>17.1)     | 44387.91<br>(23776.96,75920.1<br>7)       | 67157.67<br>(34833.37,120586.<br>04)      | 114983.75<br>(59641.96,191973.49<br>)      | 227539.51<br>(135529.33,372002<br>.68)     | 348073.82<br>(198148.14,557171<br>.82)       | 591666.76<br>(353070.48,902835.<br>74)       | 791948.99<br>(455912.32,1239827<br>.17)      |
| Russian<br>Federation  | 124770723.2<br>(71868652.42,2000<br>76965.4) | 2350498.31<br>(1309378.55,39161<br>53.16) | 3415103.92<br>(1760316.49,60428<br>56.53) | 6867868.84<br>(3671476.12,117745<br>96.25) | 15482331.9<br>(9265475.84,25197<br>635.59) | 25130973.65<br>(14531240.54,4043<br>3979.53) | 31958068.06<br>(18415185.22,49251<br>699.26) | 39565878.54<br>(22915579.66,63460<br>045.03) |
| Rwanda                 | 71375.15<br>(41078.57,115301.4)              | 2112.84<br>(1130.6,3590.47)               | 2850.21<br>(1488.08,5028.68)              | 5062.52<br>(2664.11,8615.74)               | 9317.47<br>(5524.19,15128.56)              | 15148.74<br>(8543.2,25125.13)                | 18192.87<br>(10608.34,28319.22)              | 18690.5<br>(11120.05,29493.62)               |

|                                  |                                              |                                       |                                       |                                          |                                           |                                           |                                            |                                         |
|----------------------------------|----------------------------------------------|---------------------------------------|---------------------------------------|------------------------------------------|-------------------------------------------|-------------------------------------------|--------------------------------------------|-----------------------------------------|
|                                  | 1)                                           |                                       |                                       |                                          |                                           |                                           |                                            |                                         |
| Saint Kitts and Nevis            | 16.88 (9.78,26.99)                           | 0.41 (0.22,0.69)                      | 0.75 (0.39,1.3)                       | 1.43 (0.77,2.37)                         | 2.27 (1.37,3.63)                          | 3.14 (1.75,5)                             | 3.9 (2.33,6.08)                            | 4.99 (2.95,7.93)                        |
| Saint Lucia                      | 84.65<br>(49.03,135.28)                      | 1.95 (1.05,3.29)                      | 3.61 (1.88,6.28)                      | 7.25 (3.88,11.99)                        | 10.41 (6.31,16.68)                        | 15.24 (8.49,24.29)                        | 19.97 (11.94,31.14)                        | 26.21 (15.48,41.62)                     |
| Saint Vincent and the Grenadines | 26.27 (15.19,42.01)                          | 0.75 (0.4,1.26)                       | 1.27 (0.66,2.21)                      | 2.29 (1.23,3.79)                         | 3.24 (1.96,5.19)                          | 4.79 (2.67,7.63)                          | 6.28 (3.75,9.79)                           | 7.64 (4.51,12.13)                       |
| Samoa                            | 37.87 (21.82,60.38)                          | 1.03 (0.56,1.77)                      | 1.62 (0.85,2.79)                      | 3.01 (1.58,5.05)                         | 4.89 (2.91,7.84)                          | 6.67 (3.83,10.89)                         | 8.75 (5.18,13.45)                          | 11.89 (6.9,18.58)                       |
| San Marino                       | 19.14 (11.43,29.08)                          | 0.38 (0.22,0.64)                      | 0.48 (0.26,0.82)                      | 0.84 (0.46,1.36)                         | 1.5 (0.89,2.38)                           | 2.81 (1.63,4.23)                          | 4.99 (3.06,7.45)                           | 8.12 (4.92,12.19)                       |
| Sao Tome and Principe            | 56.54 (33.11,89.23)                          | 1.77 (0.97,2.99)                      | 2.29 (1.19,4.05)                      | 3.98 (2.17,6.73)                         | 6.84 (4.2,11.18)                          | 10.84 (6.2,17.38)                         | 14.47 (8.62,21.7)                          | 16.34 (9.77,25.19)                      |
| Saudi Arabia                     | 29890451.56<br>(17678037.66,4670<br>9491.68) | 340513.7<br>(185057.22,571772<br>.66) | 674810.79<br>(352665.6,1167010<br>.9) | 1693378.45<br>(900247.18,2806724.<br>17) | 3774575.13<br>(2301609.01,61633<br>31.92) | 6577639.3<br>(3767474.96,10379<br>117.41) | 8285147.92<br>(4984034.48,126842<br>35.63) | 8544386.26<br>(5186949.21,129372<br>99) |
| Senegal                          | 163973.75<br>(95891.8,259460.13<br>)         | 5434.87<br>(2963.12,9175.04)          | 7416.21<br>(3841.05,13087.64)         | 13238.15<br>(7198.55,22373.92)           | 21405.82<br>(13155.42,35015.0<br>8)       | 31227.88<br>(17852.87,50058.6<br>8)       | 39940.48<br>(23796.98,59907.12)            | 45310.34<br>(27083.81,69842.64)         |
| Serbia                           | 320082.95<br>(184173.24,508189.<br>06)       | 7169.55<br>(3840.45,12262.64)         | 11177.13<br>(5797.36,20069.28)        | 21806.75<br>(11311.13,36407.9)           | 35453.99<br>(21117.43,57963.4<br>3)       | 57118.03<br>(32515.63,91430.5<br>7)       | 82287.33<br>(49104.01,125563.7<br>9)       | 105070.18<br>(60487.23,164491.4<br>5)   |
| Seychelles                       | 55.66 (32.24,89.15)                          | 0.8 (0.45,1.35)                       | 1.38 (0.74,2.43)                      | 3 (1.59,4.98)                            | 5.54 (3.31,9.32)                          | 9.41 (5.24,15.73)                         | 14.59 (8.56,22.09)                         | 20.93 (12.36,33.25)                     |
| Sierra Leone                     | 79214.53<br>(46251.55,125631.7<br>3)         | 2840.48<br>(1548.65,4795.25)          | 4052.05<br>(2098.66,7150.79)          | 7036.31<br>(3826.16,11892.14)            | 11002.11<br>(6761.59,17996.96)            | 15106.82<br>(8636.51,24216.41)            | 19460.81<br>(11594.97,29189.47)            | 19715.95<br>(11785.01,30390.71)         |
| Singapore                        | 674891.09<br>(393318.77,106665<br>4.66)      | 9458.77<br>(5216.57,15767.93)         | 15848.29<br>(8331.54,27904.54)        | 43064.82<br>(23546.25,71131.46)          | 82865.15<br>(49720.27,132582.<br>59)      | 130313.97<br>(74586.18,205147.<br>12)     | 205665.31<br>(121652.71,318320.<br>93)     | 187674.79<br>(110265.25,295800.<br>09)  |
| Slovakia                         | 252742.86                                    | 4245.89                               | 7165.06                               | 15378.2                                  | 27810.01                                  | 45685.94                                  | 67575.44                                   | 84882.32                                |

|                 |                                          |                                    |                                     |                                      |                                       |                                       |                                        |                                        |
|-----------------|------------------------------------------|------------------------------------|-------------------------------------|--------------------------------------|---------------------------------------|---------------------------------------|----------------------------------------|----------------------------------------|
|                 | (145729.77,400400.8)                     | (2274.37,7262.08)                  | (3716.39,12865.35)                  | (7976.66,25674.99)                   | (16564.47,45466.4)                    | (26007.62,73130.78)                   | (40324.89,103114.61)                   | (48865.37,132886.59)                   |
| Slovenia        | 43472.79<br>(25075.81,68827.33)          | 756.68<br>(405.33,1294.2)          | 1238.66<br>(642.47,2224.11)         | 2436.53<br>(1263.83,4067.96)         | 4545.7<br>(2707.56,7431.74)           | 7730.33<br>(4400.66,12374.18)         | 11769.71<br>(7023.45,17959.61)         | 14995.18<br>(8632.5,23475.54)          |
| Solomon Islands | 154.51<br>(89.1,246.13)                  | 3.88 (2.09,6.64)                   | 6.43 (3.4,11.11)                    | 11.71 (6.15,19.63)                   | 18.73 (11.13,30.02)                   | 27.87 (16.01,45.5)                    | 38.31 (22.7,58.9)                      | 47.59 (27.62,74.33)                    |
| Somalia         | 22069.77<br>(12684.33,35655.03)          | 799.64<br>(427.9,1358.88)          | 1011.81<br>(528.26,1785.16)         | 1662.29<br>(874.77,2828.99)          | 2573.58<br>(1525.84,4178.67)          | 4322.18<br>(2437.51,7168.61)          | 5998.78<br>(3497.92,9337.77)           | 5701.48<br>(3392.14,8996.94)           |
| South Africa    | 19171968.72<br>(11020957.23,30700276.63) | 411382.67<br>(223638.4,697646.85)  | 627530.84<br>(332372.46,1109338.51) | 1368474.68<br>(708370.43,2311389)    | 2512302.56<br>(1470724.54,4229768.45) | 3924132.98<br>(2251159.16,6311429.03) | 4825569.1<br>(2796760.08,7205426.81)   | 5502575.88<br>(3237932.18,8835277.98)  |
| South Sudan     | 21881.47<br>(12615.02,35282.64)          | 753.43<br>(403.17,1280.35)         | 894.38<br>(466.95,1577.97)          | 1203.48<br>(633.32,2048.16)          | 2539.55<br>(1505.66,4123.41)          | 4402.69<br>(2482.91,7302.14)          | 5804.95<br>(3384.89,9036.05)           | 6282.99<br>(3738.11,9914.56)           |
| Spain           | 32249746.05<br>(19201048.99,49278866.89) | 578079.03<br>(328686.99,972660.83) | 677608.06<br>(377605.51,1170503.27) | 1284992.19<br>(723968.73,2084801.35) | 2585373.26<br>(1574450.49,4094183.84) | 5269859.24<br>(3037748.7,8053810.81)  | 9222734.66<br>(5538513.73,13783057.89) | 12631099.61<br>(7620074.83,19119848.9) |
| Sri Lanka       | 782425.72<br>(452612.98,1253984.97)      | 13049.12<br>(7279.42,21951.93)     | 21398.34<br>(11379.96,37621.68)     | 44699.72<br>(23745.69,74142.2)       | 78972.02<br>(47125.61,132763.55)      | 140777.77<br>(78337.73,235206.37)     | 213043.21<br>(124999.79,322500.72)     | 270485.53<br>(159744.77,429798.5)      |
| Sudan           | 2299480.81<br>(1352469.22,3612865.85)    | 61390.47<br>(33363.56,103083.62)   | 90813.73<br>(47460.55,157052.35)    | 172355.27<br>(91628.88,285673.72)    | 304949.16<br>(185947.75,497937.59)    | 479988.25<br>(274922.9,757392.45)     | 590387.42<br>(355154.94,903859.98)     | 599596.5<br>(363990.63,907866.14)      |
| Suriname        | 1446.69<br>(836.39,2315.51)              | 42.67 (22.98,71.81)                | 72.86 (37.9,126.54)                 | 127.2 (68.03,210.39)                 | 195.32<br>(118.42,312.89)             | 270.03<br>(150.54,430.49)             | 323.88<br>(193.58,504.87)              | 414.73<br>(244.94,658.53)              |
| Sweden          | 2601840.99<br>(1566615.98,39998)         | 60339.86<br>(34160.36,101060.      | 73305.23<br>(39628.83,128799.       | 160603.25<br>(89525.55,263670.27     | 308901.94<br>(190227.68,491040        | 456289.71<br>(265776.09,687483        | 636614.92<br>(389341.96,954042.        | 905786.08<br>(557955.51,1373742        |

|                                  |                                           |                                      |                                        |                                        |                                         |                                           |                                           |                                           |
|----------------------------------|-------------------------------------------|--------------------------------------|----------------------------------------|----------------------------------------|-----------------------------------------|-------------------------------------------|-------------------------------------------|-------------------------------------------|
|                                  | 39.22)                                    | 46)                                  | 82)                                    | )                                      | .78)                                    | .69)                                      | 07)                                       | .13)                                      |
| Switzerland                      | 2658055.85<br>(1582440.19,40477<br>73.33) | 48001.19<br>(27849.58,79660.0<br>9)  | 66985.2<br>(35704.42,113976.<br>81)    | 142356.05<br>(78442.06,230809.61<br>)  | 288532.7<br>(170306.59,456915<br>.52)   | 495140.69<br>(286399.1,744796)            | 697481.88<br>(427307.25,1041467<br>.07)   | 919558.15<br>(556431.2,1380148.<br>22)    |
| Syrian Arab Republic             | 1383186.99<br>(819054.15,215145<br>1.61)  | 34190.74<br>(18581.47,57411.2<br>8)  | 47460.45<br>(24803.49,82077.6<br>1)    | 41811.39<br>(22228.1,69301.11)         | 94215.9<br>(57449.7,153840.8<br>4)      | 273153.27<br>(156454,431019.37<br>)       | 395725.66<br>(238053.73,605840.<br>35)    | 496629.58<br>(301483.66,751961.<br>04)    |
| Taiwan<br>(Province of<br>China) | 6108139.82<br>(4949525,7507275.<br>04)    | 36565.97<br>(29557.05,44722.1<br>3)  | 105439.65<br>(85651.72,130347.<br>14)  | 258487.7<br>(207242.96,319356.7<br>6)  | 491158.55<br>(388552.5,595004.<br>21)   | 1011221.6<br>(818875.77,128916<br>9.13)   | 1800716.41<br>(1472137.78,217461<br>9.51) | 2404549.95<br>(1947507.22,295405<br>6.17) |
| Tajikistan                       | 69105.99<br>(39475.45,110905.9<br>5)      | 2506<br>(1342.37,4286.21)            | 4030.39<br>(2090.49,7236.84)           | 7256.19<br>(3763.78,12114.72)          | 11085.39<br>(6602.79,18123.43)          | 13321.62<br>(7583.61,21324.31)            | 14253.85<br>(8505.82,21750.24)            | 16652.54<br>(9586.6,26070.2)              |
| Thailand                         | 12603814.4<br>(7312002.93,20134<br>597.9) | 135444.93<br>(75557.7,227852.8<br>3) | 267652.32<br>(142341.58,470575<br>.34) | 589127.73<br>(312960.34,977169.7<br>7) | 1027549.01<br>(613177.2,1727460<br>.24) | 2046255.07<br>(1138666.96,34188<br>08.29) | 3373517.46<br>(1979358.89,510676<br>6.61) | 5164267.86<br>(3049940.26,820596<br>4.82) |
| Timor-Leste                      | 763.99<br>(439.42,1234.64)                | 25.56 (14.26,42.99)                  | 40.96 (21.78,72.01)                    | 68.87 (36.58,114.23)                   | 97.95<br>(58.45,164.67)                 | 128.68<br>(71.6,214.99)                   | 172.87<br>(101.43,261.68)                 | 229.11<br>(135.31,364.06)                 |
| Togo                             | 32535.49<br>(19062.6,51347.23)            | 897.88<br>(489.53,1515.79)           | 1233.55<br>(638.89,2176.89)            | 2307.78<br>(1254.91,3900.41)           | 4130.73<br>(2538.63,6756.93)            | 6473.83<br>(3701.07,10377.63)             | 8252.8<br>(4917.11,12378.46)              | 9238.91<br>(5522.47,14241.12)             |
| Tokelau                          | 0.02 (0.01,0.03)                          | 0 (0,0)                              | 0 (0,0)                                | 0 (0,0)                                | 0 (0,0)                                 | 0 (0,0)                                   | 0 (0,0.01)                                | 0.01 (0,0.01)                             |
| Tonga                            | 8.76 (5.05,13.95)                         | 0.22 (0.12,0.38)                     | 0.36 (0.19,0.62)                       | 0.63 (0.33,1.06)                       | 1 (0.59,1.6)                            | 1.56 (0.9,2.55)                           | 2.16 (1.28,3.32)                          | 2.84 (1.65,4.43)                          |
| Trinidad and<br>Tobago           | 11907.27<br>(6897.55,19015.24)            | 279.1<br>(150.32,469.67)             | 445.93<br>(232,774.51)                 | 901.11<br>(481.94,1490.42)             | 1617.15<br>(980.46,2590.5)              | 2547.83<br>(1420.41,4061.89)              | 2865.28<br>(1712.51,4466.38)              | 3250.87<br>(1919.92,5161.87)              |
| Tunisia                          | 885103.48<br>(524643.55,137879<br>4.41)   | 11078.33<br>(6020.68,18602.14)       | 18185.86<br>(9504.2,31450.45)          | 42846.6<br>(22778.44,71016.94)         | 94435.07<br>(57583.34,154198.<br>76)    | 176657.07<br>(101183.85,278754<br>.16)    | 253373.85<br>(152420.21,387905.<br>41)    | 288526.69<br>(175152.82,436866.<br>55)    |
| Turkmenistan                     | 89435.08<br>(51189.34,142999.8)           | 3040.67<br>(1628.77,5200.7)          | 4669.81<br>(2422.14,8384.96)           | 8282.67<br>(4296.2,13828.49)           | 12121.32<br>(7219.82,19817.04)          | 16136.68<br>(9186.16,25830.47)            | 20167.01<br>(12034.42,30773.22)           | 25016.91<br>(14401.84,39164.93)           |

|                              |                                             |                                            |                                              |                                              |                                              |                                              |                                              |                                              |
|------------------------------|---------------------------------------------|--------------------------------------------|----------------------------------------------|----------------------------------------------|----------------------------------------------|----------------------------------------------|----------------------------------------------|----------------------------------------------|
|                              | 1)                                          |                                            |                                              |                                              |                                              |                                              |                                              |                                              |
| Tuvalu                       | 0.32 (0.19,0.52)                            | 0.01 (0,0.01)                              | 0.01 (0.01,0.02)                             | 0.03 (0.01,0.04)                             | 0.04 (0.02,0.06)                             | 0.06 (0.03,0.09)                             | 0.08 (0.05,0.12)                             | 0.1 (0.06,0.16)                              |
| Türkiye                      | 60490105.36<br>(35848122.5,94217<br>087.01) | 839166.71<br>(456057.66,140908<br>4.57)    | 1500278.61<br>(784066.95,259456<br>6.71)     | 3077634.82<br>(1636156.58,510108<br>7.84)    | 6095078.3<br>(3716573.59,99523<br>75.28)     | 11176890.63<br>(6401788.28,17636<br>458.42)  | 17101498.63<br>(10287620.18,26181<br>722.26) | 20699557.66<br>(12565859.27,31341<br>791.93) |
| Uganda                       | 544470.77<br>(312418.54,882095.<br>98)      | 21260.17<br>(11376.51,36128.6<br>3)        | 27473.96<br>(14344.05,48472.8<br>5)          | 47506.52<br>(24999.93,80849.85)              | 76159.41<br>(45153.79,123658.<br>34)         | 106658.27<br>(60150.33,176899.<br>4)         | 127825.32<br>(74535.52,198974.3<br>4)        | 137587.12<br>(81858.41,217112.5<br>7)        |
| Ukraine                      | 6785177.9<br>(3907177.62,10881<br>623.11)   | 114419.52<br>(63739.05,190633.<br>78)      | 176850.13<br>(91157.48,312927.<br>52)        | 403525.35<br>(215719.55,691822.8<br>5)       | 804549.96<br>(481486.79,130941<br>2.25)      | 1345390.52<br>(777932.18,216463<br>9.26)     | 1719223.34<br>(990667.41,2649555<br>.49)     | 2221219.08<br>(1286475.17,356263<br>1.97)    |
| United Arab Emirates         | 1656306.46<br>(981877.54,257019<br>9.77)    | 13348.67<br>(7254.52,22414.38)             | 21022.11<br>(10986.43,36355.4)               | 34926.42<br>(18567.86,57889.45)              | 101027.9<br>(61603.38,164963.<br>84)         | 446434.39<br>(255704.3,704446.<br>48)        | 601374.55<br>(361764.33,920680.<br>75)       | 438172.43<br>(265996.73,663449.<br>48)       |
| United Kingdom               | 120658551<br>(71575145.64,1875<br>77682.5)  | 2829055.71<br>(1577034.16,47009<br>81.58)  | 3886595.51<br>(2072024.65,68546<br>54.06)    | 7414090.93<br>(4020674.79,121276<br>44.11)   | 13630106.47<br>(8344702.3,220660<br>37.01)   | 22020434.13<br>(12500570.64,3426<br>6604.28) | 30037662.73<br>(18202850.61,45027<br>045.43) | 40840605.57<br>(24857288.49,62534<br>715.99) |
| United Republic of Tanzania  | 891084.39<br>(512542.49,143999<br>1.38)     | 29080.71<br>(15561.35,49418.5<br>2)        | 39101.25<br>(20414.62,68987.0<br>9)          | 69847.35<br>(36756.6,118870.98)              | 114179.93<br>(67695.6,185391.4<br>4)         | 172843.35<br>(97475.68,286671.<br>47)        | 221911.39<br>(129397.53,345429.<br>71)       | 244120.42<br>(145241.12,385222.<br>16)       |
| United States of America     | 4099966510<br>(2380920868,65727<br>96026)   | 128522549<br>(71063002.69,2163<br>03882.3) | 192935792.2<br>(104292823.2,3430<br>89156.4) | 339370033.5<br>(180007780.9,55548<br>6011.2) | 532661373.7<br>(324530551.5,8680<br>66778.3) | 771290692.1<br>(446024223.7,1234<br>171034)  | 977528032.9<br>(577938367,154209<br>1496)    | 1157658037<br>(677064118.6,18135<br>87668)   |
| United States Virgin Islands | 18.9 (10.97,30.17)                          | 0.45 (0.24,0.76)                           | 0.67 (0.35,1.16)                             | 1.4 (0.75,2.32)                              | 2.21 (1.34,3.54)                             | 3.33 (1.86,5.31)                             | 4.53 (2.7,7.05)                              | 6.32 (3.73,10.03)                            |
| Uruguay                      | 68356.05<br>(39594.84,107049.2<br>1)        | 2125.02<br>(1160.96,3584.63)               | 3040.08<br>(1622.92,5368.67)                 | 5064.78<br>(2734.7,8281.16)                  | 7705.12<br>(4663.04,12513.29)                | 12042.77<br>(6787.3,18837.54)                | 17155.8<br>(10125.92,26083.03)               | 21222.48<br>(12500,32380.89)                 |
| Uzbekistan                   | 1384845.41                                  | 37654.85                                   | 62360.71                                     | 126081.3                                     | 200561.24                                    | 268529.48                                    | 316859.71                                    | 372798.12                                    |

|                                          |                                             |                                        |                                        |                                         |                                          |                                          |                                           |                                           |
|------------------------------------------|---------------------------------------------|----------------------------------------|----------------------------------------|-----------------------------------------|------------------------------------------|------------------------------------------|-------------------------------------------|-------------------------------------------|
|                                          | (793936.25,221174<br>9.82)                  | (20170.3,64404.14)                     | (32345.25,111972.<br>77)               | (65398.23,210501.55<br>)                | (119460.19,327896<br>.01)                | (152865.91,429843<br>.09)                | (189082.47,483502.<br>22)                 | (214613.91,583630.<br>04)                 |
| Vanuatu                                  | 30.21 (17.41,48.17)                         | 0.75 (0.4,1.28)                        | 1.32 (0.7,2.29)                        | 2.48 (1.31,4.16)                        | 3.76 (2.23,6.02)                         | 5.41 (3.11,8.83)                         | 7.28 (4.32,11.2)                          | 9.21 (5.35,14.39)                         |
| Venezuela<br>(Bolivarian<br>Republic of) | 552380.32<br>(320286.15,882218.<br>32)      | 15655.7<br>(8432.13,26345.99)          | 20675.48<br>(10756.84,35910.2<br>8)    | 42201.88<br>(22570.96,69801.24)         | 75912.32<br>(46024.83,121603.<br>29)     | 105277.66<br>(58691.8,167839.8<br>4)     | 136847.01<br>(81790.18,213315.8<br>6)     | 155810.27<br>(92019.41,247401.8<br>2)     |
| Viet Nam                                 | 15707835.41<br>(9087440.09,25220<br>552.07) | 209044.41<br>(116615.05,351665<br>.97) | 359237.63<br>(191048.08,631596<br>.75) | 921826.43<br>(489698.79,1529008.<br>08) | 1885340.13<br>(1125053.61,31695<br>32.9) | 3011561.39<br>(1675824.9,503160<br>6.62) | 4036096.31<br>(2368116.77,610976<br>5.87) | 5284729.11<br>(3121082.88,839737<br>5.88) |
| Yemen                                    | 602617.23<br>(354466.09,947011.<br>86)      | 16985.52<br>(9231.03,28521.19)         | 22681.35<br>(11853.6,39224.9)          | 42670.6<br>(22684.87,70725.24)          | 82113.97<br>(50070.34,134080.<br>17)     | 131389.81<br>(75256.15,207325.<br>2)     | 156657.27<br>(94239.14,239836.1<br>3)     | 150118.7<br>(91130.95,227299.0<br>2)      |
| Zambia                                   | 182724.32<br>(104893.98,295878.<br>65)      | 6400.25<br>(3424.83,10876.32)          | 8631.5<br>(4506.47,15228.72)           | 15666.05<br>(8244.14,26661.56)          | 25550.24<br>(15148.37,41485.3<br>7)      | 37174.89<br>(20964.91,61656.8<br>6)      | 44313.5<br>(25839.4,68978.9)              | 44987.89<br>(26765.85,70990.93)           |
| Zimbabwe                                 | 187832.6<br>(108749.95,298558.<br>88)       | 6281.77<br>(3387.34,10586.92)          | 8718.68<br>(4674.76,15307.79)          | 14823.46<br>(8086.31,24281.5)           | 24070.14<br>(14463.67,39553.8)           | 38284.79<br>(21696.27,61446.2<br>4)      | 47528.06<br>(28076.94,72086.55)           | 48125.69<br>(28364.66,75296.09)           |

**Table S14. Total healthcare expenditure for women of reproductive age in all age groups due to low back pain in 204 countries or territories in 2021**

| Location            | Total healthcare expenditure (95% uncertainty interval, 2020 US\$) |                                      |                                       |                                      |                                       |                                      |                                       |                                       |
|---------------------|--------------------------------------------------------------------|--------------------------------------|---------------------------------------|--------------------------------------|---------------------------------------|--------------------------------------|---------------------------------------|---------------------------------------|
|                     | All ages (15-49 years)                                             | 15-19 years                          | 20-24 years                           | 25-29 years                          | 30-34 years                           | 35-39 years                          | 40-44 years                           | 45-49 years                           |
| Afghanistan         | 755318.55<br>(542094.01,1019984.83)                                | 89178.68<br>(64729.94,119092.02)     | 84934.38<br>(60254.49,117246.41)      | 100158.09<br>(71590.26,134201.12)    | 95910.93<br>(68318.28,129348.1)       | 98777.87<br>(71782.98,131559.87)     | 109509.88<br>(79418.1,146864.49)      | 176848.72<br>(125999.96,241672.82)    |
| Albania             | 38260.16<br>(27722.35,51005.67)                                    | 1849.56<br>(1314.37,2451.69)         | 2353.55<br>(1679.05,3226.32)          | 3253.83<br>(2312.89,4375.3)          | 4462.28<br>(3196.62,5951.81)          | 6070.25<br>(4522,8060.47)            | 8036.51<br>(5793.9,10737.59)          | 12234.18<br>(8903.51,16202.49)        |
| Algeria             | 6635783.9<br>(4748292.95,9006499.98)                               | 366906.57<br>(259492.97,500702.37)   | 396325.55<br>(277146.09,542958.81)    | 640814.45<br>(462105.8,869324.64)    | 961910.9<br>(688910.49,1321081.94)    | 1326551.57<br>(981186.42,1767276.78) | 1423764.2<br>(1014595.89,1909585.3)   | 1519510.65<br>(1064855.29,2095570.14) |
| American Samoa      | 4.6 (3.23,6.25)                                                    | 0.24 (0.17,0.32)                     | 0.25 (0.17,0.35)                      | 0.34 (0.24,0.46)                     | 0.47 (0.33,0.65)                      | 0.71 (0.51,0.95)                     | 1.06 (0.76,1.44)                      | 1.52 (1.05,2.09)                      |
| Andorra             | 119.03 (84.47,161)                                                 | 3.63 (2.6,4.88)                      | 4.86 (3.43,6.59)                      | 7.4 (5.26,10.07)                     | 11.7 (8.33,15.96)                     | 18.99 (13.84,25.67)                  | 28.98 (20.72,38.78)                   | 43.48<br>(30.29,59.04)                |
| Angola              | 599620.06<br>(427233.49,812246.28)                                 | 43593.44<br>(30988.21,59191.18)      | 46228.71<br>(32301.24,63607.38)       | 65062.4<br>(45930,87426.48)          | 87447.26<br>(62318.56,120033.69)      | 107381.47<br>(77649.85,143611.17)    | 120197.61<br>(86661.47,161003.88)     | 129709.18<br>(91384.15,177372.51)     |
| Antigua and Barbuda | 42.34 (30.14,57.07)                                                | 1.63 (1.16,2.19)                     | 2.37 (1.64,3.27)                      | 3.66 (2.59,4.92)                     | 5.15 (3.6,6.91)                       | 7.34 (5.36,9.84)                     | 9.31 (6.69,12.47)                     | 12.88 (9.1,17.48)                     |
| Argentina           | 29037440.89<br>(21011943.13,38586368.7)                            | 1309167.07<br>(951031.03,1729976.72) | 1860500.17<br>(1307876.03,2513449.86) | 2756408.08<br>(1971401.49,3668932.7) | 3759934.13<br>(2719790.42,4973296.23) | 5238504<br>(3876470.45,6904470.75)   | 6505565.24<br>(4694175.18,8678299.88) | 7607362.2<br>(5491198.53,10117942.55) |
| Armenia             | 62309.21<br>(44837.73,83841.81)                                    | 1870.49<br>(1342.45,2540.17)         | 2115.21<br>(1483.55,2967.21)          | 4225.94<br>(2944.22,5727.6)          | 8331.65<br>(5864.22,11453.21)         | 12591.93<br>(9327.78,16627.36)       | 15006.31<br>(10893.15,20227.52)       | 18167.69<br>(12982.36,24298.73)       |
| Australia           | 27452377.23<br>(19927635.71,36520)                                 | 1011977.6<br>(747202.58,1340898)     | 1651608.11<br>(1180867.93,2218)       | 2679433.68<br>(1919433.84,35780)     | 3702864.08<br>(2655750.27,50091)      | 5087102.68<br>(3759734.54,66669)     | 5788707.04<br>(4161479.49,771293)     | 7530684.04<br>(5503167.06,9994)       |

|            |                                          |                                     |                                      |                                       |                                       |                                       |                                      |                                      |
|------------|------------------------------------------|-------------------------------------|--------------------------------------|---------------------------------------|---------------------------------------|---------------------------------------|--------------------------------------|--------------------------------------|
|            | 520.12)                                  | .07)                                | 275.96)                              | 34.62)                                | 60.67)                                | 08.91)                                | 0.4)                                 | 311.5)                               |
| Austria    | 2049797.44<br>(1465012.6,2752352.58)     | 75521.16<br>(53919.9,100754.1)      | 105781.99<br>(75694.41,142814.12)    | 181443.4<br>(130930.05,244291.86)     | 251098.8<br>(177803.4,341106.52)      | 342354.13<br>(247366.21,461530.38)    | 448220.68<br>(321508.19,592842.77)   | 645377.27<br>(457790.45,869012.83)   |
| Azerbaijan | 310249.92<br>(223233.86,419704.92)       | 10610.97<br>(7506.92,14341.93)      | 12763.18<br>(9039.64,17584.11)       | 24812.6<br>(17540.13,33826.97)        | 43285.46<br>(30906.5,58158.02)        | 60078.64<br>(44630.66,80647.63)       | 69859.03<br>(50257.44,94208.48)      | 88840.04<br>(63352.58,120937.79)     |
| Bahamas    | 1430.72<br>(1022.35,1938.09)             | 69.88 (49.48,92.91)                 | 83.55<br>(58.88,114.67)              | 127.69<br>(90.34,172.32)              | 176.23<br>(125.48,238.51)             | 240.47<br>(172.56,322.99)             | 314.3<br>(227.31,424.42)             | 418.6<br>(298.31,572.27)             |
| Bahrain    | 18808.33<br>(13399.56,25448.34)          | 1096.6<br>(762.71,1486.61)          | 1263.45<br>(906.42,1724.66)          | 1832.61<br>(1309.32,2449.13)          | 2661.22<br>(1894.21,3555.78)          | 3317.96<br>(2434.34,4447.76)          | 4207.81<br>(2934.99,5729.87)         | 4428.67<br>(3157.56,6054.53)         |
| Bangladesh | 19198951.17<br>(13829964.38,25713233.11) | 933965.14<br>(665121.84,1261870.52) | 1265765.55<br>(880341.44,1741532.37) | 1876132.75<br>(1330052.69,2566233.64) | 2515891.94<br>(1816647.75,3402593.06) | 3252369.44<br>(2395804.02,4341249.58) | 4068163.55<br>(2973789.2,5399978.12) | 5286662.8<br>(3768207.45,6999775.81) |
| Barbados   | 316.48<br>(224.66,432.95)                | 12.1 (8.47,16.54)                   | 16.37<br>(11.18,22.41)               | 25.27 (18.01,34.41)                   | 36.54<br>(25.85,49.33)                | 53.52 (38.94,71.37)                   | 69.41 (49.04,94.88)                  | 103.26<br>(73.18,144.02)             |
| Belarus    | 559324.63<br>(401869.1,744522.04)        | 15578.59<br>(11118,20977.76)        | 16798.1<br>(11760.4,22898.14)        | 30793.22<br>(22037.71,40815.57)       | 65403.83<br>(46538.38,87817.5)        | 107455.82<br>(78384.15,140463.78)     | 137203.95<br>(98211.34,183279.53)    | 186091.12<br>(133819.11,248269.76)   |
| Belgium    | 3479268.7<br>(2496729.31,4725168.46)     | 155614.74<br>(113157.15,205678.84)  | 192492.36<br>(135689.93,266373.19)   | 301554.15<br>(213193.08,412304.65)    | 422587.19<br>(301685.2,575198.16)     | 584152.85<br>(429158.44,785272.95)    | 772534.52<br>(555744.29,1049397.96)  | 1050332.89<br>(748101.22,1430942.7)  |
| Belize     | 287.38<br>(204.55,389.69)                | 18.97 (13.36,25.34)                 | 22.87<br>(15.73,31.61)               | 30.83 (21.8,41.68)                    | 39.17<br>(27.49,53.15)                | 49.55 (35.78,67.19)                   | 57.15 (40.82,76.94)                  | 68.85<br>(49.58,93.78)               |
| Benin      | 42288.8<br>(29993.46,57462.43)           | 2846.23<br>(1997.26,3872.03)        | 3440.81<br>(2340.38,4745.87)         | 4822.34<br>(3414.23,6504.04)          | 5851.08<br>(4117.49,7900.4)           | 7522.33<br>(5514.08,10114.8)          | 8767.09<br>(6301.74,11799.94)        | 9038.92<br>(6308.27,12525.34)        |
| Bermuda    | 76.11                                    | 2.3 (1.6,3.06)                      | 3.01 (2.09,4.15)                     | 4.98 (3.54,6.7)                       | 8.25 (5.93,11.24)                     | 13.41 (9.75,18.18)                    | 18.58 (13.15,25.31)                  | 25.59                                |

|                                        |                                              |                                             |                                             |                                              |                                              |                                              |                                              |                                              |
|----------------------------------------|----------------------------------------------|---------------------------------------------|---------------------------------------------|----------------------------------------------|----------------------------------------------|----------------------------------------------|----------------------------------------------|----------------------------------------------|
|                                        | (54.01,103.54)                               |                                             |                                             |                                              |                                              |                                              |                                              | (17.95,34.92)                                |
| Bhutan                                 | 1148.25<br>(821.37,1547.95)                  | 53.09 (37.76,72.62)                         | 73.67<br>(51.57,100.86)                     | 116.08<br>(82.34,155.74)                     | 166.52<br>(117.91,222.99)                    | 213.53<br>(155.61,288.37)                    | 244.12<br>(175.65,325.75)                    | 281.23<br>(200.53,381.63)                    |
| Bolivia<br>(Plurinational<br>State of) | 223184.4<br>(157732.68,305122.<br>28)        | 12966.23<br>(9245.61,17312.05)              | 16471.95<br>(11407.82,22697.0<br>1)         | 24296.35<br>(16893.97,32911.5<br>3)          | 31357.23<br>(22201.9,43263.97<br>)           | 39727.06<br>(28726.86,53972.49<br>)          | 45698.5<br>(32107.39,62246.87<br>)           | 52667.08<br>(37149.13,72718.3<br>5)          |
| Bosnia and<br>Herzegovina              | 101444.29<br>(73389.81,134689.3<br>5)        | 3851.33<br>(2746.33,5146.37)                | 4664.84<br>(3329.78,6413.62)                | 6521.91<br>(4675.3,8752.43)                  | 10154.58<br>(7305.93,13528.14<br>)           | 16753.46<br>(12233.83,22088.51<br>)          | 25412.06<br>(18593.83,33781.29<br>)          | 34086.13<br>(24504.8,44978.98<br>)           |
| Botswana                               | 21887.43<br>(15595.03,29961.97<br>)          | 909.25<br>(633.56,1220.86)                  | 1148.27<br>(809.31,1589.5)                  | 2057.53<br>(1452.6,2767.9)                   | 3148.85<br>(2209.44,4373.57)                 | 4358.46<br>(3205.21,5914.95)                 | 4731.83<br>(3401.25,6490.84)                 | 5533.24<br>(3883.66,7604.34)                 |
| Brazil                                 | 434502381.9<br>(313313047.9,57992<br>6317.6) | 20485929.96<br>(14735874.9,271891<br>59.74) | 28230105.2<br>(20157222.02,382<br>80460.72) | 39719756.93<br>(29032058.08,5314<br>0290.49) | 54694896.28<br>(39500835.33,7296<br>7886.81) | 80101542.77<br>(59292156.44,1051<br>24542.9) | 97353741.37<br>(69124237.03,12985<br>7630.6) | 113916409.3<br>(81470664.06,153<br>366346.3) |
| Brunei<br>Darussalam                   | 2047.49<br>(1468.18,2760.19)                 | 86.63<br>(63.35,114.41)                     | 130.35<br>(93.18,177.85)                    | 209.05<br>(147.54,281.71)                    | 297.07<br>(210.48,400.28)                    | 383.93<br>(278.19,515.49)                    | 436.52<br>(310.93,588.5)                     | 503.96<br>(364.52,681.95)                    |
| Bulgaria                               | 533518.86<br>(383887.34,707745.<br>04)       | 17757.07<br>(12710.98,23627.14<br>)         | 18549.91<br>(13196.42,25437.0<br>3)         | 28436.32<br>(20303.08,38225.1<br>3)          | 56812.49<br>(40653.32,75576.2<br>5)          | 88315.28<br>(64926.46,116630.4<br>7)         | 129231.09<br>(93552.67,170315.5<br>9)        | 194416.71<br>(138544.42,25793<br>3.42)       |
| Burkina Faso                           | 184523.14<br>(130720.6,251036.3<br>3)        | 12721.18<br>(8965.68,17518.59)              | 14784.54<br>(10163.76,20661.1<br>2)         | 20538.19<br>(14642.84,28268.5<br>8)          | 26976.09<br>(19028.29,37094.8<br>2)          | 35394.85<br>(25346.45,47771.67<br>)          | 36818.63<br>(26183.4,49174.27)               | 37289.66<br>(26390.18,50547.2<br>8)          |
| Burundi                                | 48792.74<br>(34673.48,65992.74<br>)          | 3789.96<br>(2670.06,5167.48)                | 4105.76<br>(2869.31,5569.77)                | 5686.36<br>(3996.91,7606.61)                 | 8107.56<br>(5686.27,11084.45<br>)            | 9683.54<br>(7060.04,12868.48)                | 8788.31<br>(6324.31,11724.52)                | 8631.25<br>(6066.58,11971.41<br>)            |
| Cabo Verde                             | 435.3<br>(308.93,595.69)                     | 18.32 (12.76,24.7)                          | 24.83<br>(16.91,34.25)                      | 42.18 (30.03,56.62)                          | 65.33 (46.04,89.6)                           | 89.76<br>(64.94,122.13)                      | 93.36<br>(66.75,127.09)                      | 101.52<br>(71.5,141.31)                      |
| Cambodia                               | 225845.54                                    | 9620.06                                     | 13755.54                                    | 23491.92                                     | 32780.21                                     | 43781.88                                     | 47498.42                                     | 54917.52                                     |

|                          |                                          |                                        |                                        |                                        |                                          |                                         |                                         |                                         |
|--------------------------|------------------------------------------|----------------------------------------|----------------------------------------|----------------------------------------|------------------------------------------|-----------------------------------------|-----------------------------------------|-----------------------------------------|
|                          | (159551.49,307179.69)                    | (6839,13402.15)                        | (9677.66,19262.29)                     | (16561.4,31763.77)                     | (23162.27,44485.4)                       | (31350.35,58758.52)                     | (33657.93,64581.83)                     | (38302.88,74925.71)                     |
| Cameroon                 | 354662.86<br>(252930.6,483193.53)        | 22891.74<br>(16024.28,31364.26)        | 27016.48<br>(18908.19,37214.18)        | 39160.29<br>(28101.11,53742.69)        | 52685.72<br>(36678.82,71693.35)          | 67867.7<br>(50157.34,90244.76)          | 72271.97<br>(51308.8,98231.45)          | 72768.96<br>(51752.06,100702.84)        |
| Canada                   | 46091472.34<br>(33231200.42,61682941.39) | 1684770.27<br>(1250397.7,2214879.53)   | 2281234.67<br>(1628408.7,3054609.19)   | 4022409.72<br>(2891170.12,5371910.69)  | 6181019.58<br>(4378972.26,8297054.39)    | 8602186<br>(6242424.81,11535411.4)      | 10372136.06<br>(7466634.79,13770993.13) | 12947716.04<br>(9373192.04,17438083.07) |
| Central African Republic | 6331.74<br>(4513.75,8620.99)             | 447.17<br>(312.81,612.27)              | 508.24<br>(351.41,693.26)              | 662.17<br>(468.92,905.75)              | 892.42<br>(641.8,1231.05)                | 1152.03<br>(838.72,1541.54)             | 1280.91<br>(915.39,1726.4)              | 1388.79<br>(984.71,1910.72)             |
| Chad                     | 61821.28<br>(43963.87,84343.94)          | 4913.78<br>(3497.32,6714.65)           | 5333.89<br>(3714.65,7471.33)           | 6958.45<br>(4897.7,9409.32)            | 8684.47<br>(6107.75,11932.94)            | 11109.16<br>(8098.93,14901.26)          | 12225.6<br>(8732.95,16626.94)           | 12595.93<br>(8914.58,17287.49)          |
| Chile                    | 5559903.16<br>(4057002.17,7407356.21)    | 214473.47<br>(156608.12,289634.54)     | 332056.62<br>(235566.04,445190.97)     | 549768.97<br>(401008.24,740884.93)     | 763544.1<br>(550489.56,1032232.66)       | 983364.92<br>(723175.59,1289798.45)     | 1155770.5<br>(851040.53,1542630.15)     | 1560924.59<br>(1139114.09,2066984.51)   |
| China                    | 4899068412<br>(3494865934,6620197507)    | 162444377<br>(116123255.3,216954742.7) | 204677884.2<br>(142885173.3,278142588) | 308212330<br>(216281672.2,422864326.6) | 561595474.9<br>(399967855.9,761036150.3) | 773704944.1<br>(559542905.9,1033749540) | 981331722.9<br>(693103315.6,1337233825) | 1907101679<br>(1366961756,2570216336)   |
| Colombia                 | 15711525.17<br>(11510674.02,20811321.16) | 770642.84<br>(565449.17,1014929.13)    | 1175878<br>(848938.27,1582011.22)      | 1835272.38<br>(1352770.94,2383199.55)  | 2257648.03<br>(1642935.99,3057937.84)    | 2785521.96<br>(2093311.86,3621692.98)   | 3197953.73<br>(2339586.29,4182615.48)   | 3688608.21<br>(2667681.5,4968934.96)    |
| Comoros                  | 363.01<br>(256.68,493.6)                 | 19.84 (13.97,27.53)                    | 24.24<br>(16.72,33.42)                 | 37.14 (26.34,50.32)                    | 51.52<br>(35.67,69.77)                   | 65.27 (47.44,88.16)                     | 74.24<br>(53.01,100.75)                 | 90.76<br>(63.54,123.64)                 |
| Congo                    | 9738.5<br>(6894.34,13296.5)              | 558.22<br>(394.52,757.51)              | 621.96<br>(432.56,857.32)              | 912.09<br>(651.88,1241.08)             | 1325.97<br>(927.51,1820.88)              | 1872.67<br>(1348.43,2516.05)            | 2156.59<br>(1533.23,2905.48)            | 2291.01<br>(1606.22,3198.18)            |
| Cook Islands             | 1.18 (0.84,1.6)                          | 0.05 (0.04,0.07)                       | 0.07 (0.05,0.09)                       | 0.1 (0.07,0.13)                        | 0.12 (0.09,0.17)                         | 0.18 (0.13,0.24)                        | 0.27 (0.19,0.37)                        | 0.39 (0.27,0.52)                        |
| Costa Rica               | 203501.18<br>(145458.4,274286.2)         | 8411.11<br>(6057.78,11235.54)          | 12966.21<br>(9176.56,17806.67)         | 21878.4<br>(15697.43,29190.7)          | 31140.23<br>(22400.56,41851)             | 38822.86<br>(28154.71,51803.1)          | 42924.52<br>(30630.69,57558.07)         | 47357.86<br>(33340.67,64841.1)          |

|                                       |                                       |                                  |                                  |                                    |                                    |                                    |                                    |                                      |
|---------------------------------------|---------------------------------------|----------------------------------|----------------------------------|------------------------------------|------------------------------------|------------------------------------|------------------------------------|--------------------------------------|
|                                       | 3)                                    |                                  | )                                | 5)                                 |                                    | )                                  | 1)                                 |                                      |
| Croatia                               | 216412.86<br>(155819.09,288682.97)    | 23258.35<br>(16209.76,31823.34)  | 9852.18<br>(7009.39,13361.92)    | 14011.42<br>(10002.95,18660.55)    | 22445.7<br>(16035.46,30230.41)     | 37629.3<br>(27628.16,50365.8)      | 52147.1<br>(37798.5,69250.59)      | 72290.84<br>(51500.78,96296.03)      |
| Cuba                                  | 1089530.58<br>(831976.91,1398978.2)   | 8036.31<br>(5843.84,10517.68)    | 55706.05<br>(40576.42,74423.55)  | 83828.21<br>(62718.21,108734.59)   | 136317.7<br>(103050.41,176105.61)  | 168644.04<br>(129298.17,215547.8)  | 201091.24<br>(156396.13,254876.93) | 405153.49<br>(311181.33,517261.13)   |
| Cyprus                                | 19619.5<br>(14016.91,26391.99)        | 38789.85<br>(28756.24,52028.58)  | 843.34<br>(593.79,1144.62)       | 1600.53<br>(1146.39,2139.82)       | 2607.1<br>(1849.71,3522.54)        | 3890.64<br>(2846.28,5216.89)       | 4675.84<br>(3311.77,6219.46)       | 5431.51<br>(3862.63,7381.63)         |
| Czechia                               | 2969166.62<br>(2133285.41,3962411.56) | 570.53<br>(406.34,767.02)        | 98386.19<br>(70001.01,132660.75) | 159988.93<br>(112955.32,215122.05) | 293206.79<br>(206622.76,395277.66) | 462238.99<br>(339407.26,611822.45) | 736803.38<br>(535300.77,991229.95) | 1119095.87<br>(798363.92,1481300.99) |
| Côte d'Ivoire                         | 401699<br>(284528.04,550070.7)        | 99446.46<br>(70634.37,134997.71) | 28450.69<br>(19654.28,39435.23)  | 42604.23<br>(30249.02,58356.21)    | 60843.96<br>(42134.83,83833.74)    | 80686.36<br>(59302.23,109316.9)    | 84328.02<br>(60110.63,115295.02)   | 81527.38<br>(56867.28,112010.26)     |
| Democratic People's Republic of Korea | 83222.9<br>(58595.75,113760.55)       | 2808.96<br>(1988.99,3727.5)      | 4288.51<br>(3008.13,5925.98)     | 7005.51<br>(4944.38,9469.83)       | 9310.34<br>(6453.62,13034.81)      | 13489.1<br>(9752.16,18382.17)      | 17681.95<br>(12681.83,24154.6)     | 28638.53<br>(19766.64,39065.66)      |
| Democratic Republic of the Congo      | 1115763.02<br>(785913.58,1513937.93)  | 82829.39<br>(58332.42,114949.52) | 90879.95<br>(62830.35,125825.91) | 123544.41<br>(86626.33,166804.11)  | 161422.58<br>(113219.27,218557.62) | 202421.06<br>(145933.69,272430.22) | 218095.06<br>(155762.15,293488.83) | 236570.58<br>(163209.38,321881.72)   |
| Denmark                               | 1063246.06<br>(730621.57,1465338.94)  | 50870.38<br>(37730.23,65769.58)  | 64736.76<br>(44861.98,89780.7)   | 100779.18<br>(68736.98,139333.14)  | 124738.53<br>(84826.28,172866.86)  | 157156.04<br>(109675.05,217803)    | 222026.45<br>(151266.09,305438.5)  | 342938.72<br>(233524.96,474347.16)   |
| Djibouti                              | 450.68<br>(319.35,608.14)             | 19.62 (13.73,26.81)              | 25.28<br>(17.24,34.55)           | 41.12 (29.25,55.76)                | 69.59<br>(49.29,94.51)             | 92.61 (67.19,122.7)                | 99.36 (70.23,132.1)                | 103.1<br>(72.42,141.71)              |
| Dominica                              | 7.94 (5.67,10.77)                     | 0.43 (0.31,0.58)                 | 0.51 (0.35,0.71)                 | 0.76 (0.54,1.04)                   | 1.08 (0.77,1.48)                   | 1.43 (1.04,1.92)                   | 1.57 (1.13,2.14)                   | 2.15 (1.52,2.9)                      |

|                    |                                          |                                      |                                       |                                       |                                       |                                      |                                       |                                    |
|--------------------|------------------------------------------|--------------------------------------|---------------------------------------|---------------------------------------|---------------------------------------|--------------------------------------|---------------------------------------|------------------------------------|
| Dominican Republic | 468051.14<br>(332085.48,638741.76)       | 25164.33<br>(18290.41,34038.37)      | 34118.67<br>(23607.97,46219.4)        | 50077.7<br>(35438.1,68165.38)         | 63944.07<br>(45780.59,85775.94)       | 80408.96<br>(57786.77,109215.82)     | 96280.25<br>(68473.02,131725.84)      | 118057.17<br>(82708.61,163601)     |
| Ecuador            | 753581.02<br>(553193.79,1003823.24)      | 42030.89<br>(30084.66,56191.31)      | 54009.36<br>(38775.68,74368.11)       | 77444.17<br>(57092.77,103860.52)      | 98467.09<br>(71810.72,128488.13)      | 132587.04<br>(97249.59,173555.87)    | 157814.46<br>(118065.35,209929.67)    | 191228.01<br>(140115.01,257429.63) |
| Egypt              | 28808967.89<br>(20714126.61,38768918.99) | 2261579.8<br>(1628797.58,3059004.02) | 2348146.32<br>(1687357.64,3177866.15) | 3128257.33<br>(2247321.06,4231036.35) | 4132904.13<br>(2939077.26,5539536.57) | 5434755.22<br>(3990576.9,7288900.26) | 5700705.22<br>(4113856.39,7620020.64) | 5802619.87<br>(4107139.79,7852555) |
| El Salvador        | 164889.37<br>(117990.14,223665.16)       | 8332.93<br>(5977.54,11287.29)        | 12762.9<br>(8996.5,17273.11)          | 20135.17<br>(14460.83,26957.44)       | 23170.32<br>(16831.16,31485.16)       | 26911.81<br>(19572.89,36574.83)      | 33725.18<br>(23806.34,45559.02)       | 39851.06<br>(28344.89,54528.31)    |
| Equatorial Guinea  | 3595.14<br>(2563.83,4895.09)             | 237.67<br>(166.7,321.15)             | 279.06<br>(191.93,387.05)             | 401.03<br>(283.03,539.74)             | 545.22<br>(391.09,749.15)             | 691.31<br>(504.13,936.54)            | 714.93<br>(510.53,973.02)             | 725.92<br>(516.42,988.44)          |
| Eritrea            | 6537.34<br>(4642.17,8910.42)             | 397.83<br>(280.3,544.87)             | 475.87<br>(326.37,658.41)             | 713.2<br>(499.45,961.2)               | 978.67<br>(690.79,1357.03)            | 1215.96<br>(891.91,1624.52)          | 1292.1<br>(923.73,1749.17)            | 1463.71<br>(1029.63,2015.21)       |
| Estonia            | 22868.87<br>(16374.11,30559.73)          | 712.67<br>(515.63,945.37)            | 739.62<br>(517,1003.34)               | 1330.03<br>(943.1,1771.71)            | 2697.38<br>(1890.47,3647.66)          | 4055.14<br>(2979.99,5401.74)         | 5474.94<br>(3877.66,7258.15)          | 7859.09<br>(5650.27,10531.76)      |
| Eswatini           | 2142.24<br>(1522.85,2917.91)             | 118.4<br>(81.93,163.37)              | 148.74<br>(103.62,205.49)             | 239.86<br>(169.36,323.25)             | 334.64<br>(239.28,454.34)             | 406.45<br>(294.99,548.3)             | 421.04<br>(296.8,578.45)              | 473.12<br>(336.87,644.7)           |
| Ethiopia           | 2741641.62<br>(1965470.72,3682921.27)    | 201014.51<br>(142588.05,271592.96)   | 239403.66<br>(167933.2,320193.22)     | 327071.77<br>(233095.09,440249.33)    | 408309.06<br>(290736.66,547044.71)    | 506689.76<br>(372989.16,683748.75)   | 531288.73<br>(383808.99,708785.37)    | 527864.13<br>(374319.57,711306.93) |
| Fiji               | 1406.71<br>(993.49,1929.5)               | 61.51 (43.17,83.78)                  | 82.53<br>(57.27,114.27)               | 126.31<br>(87.39,174.88)              | 171.79<br>(121.03,237.74)             | 256.93<br>(185.45,348.02)            | 320.86<br>(230.77,438.76)             | 386.78<br>(268.41,532.05)          |
| Finland            | 512068.66<br>(369314.96,686941.7)        | 17234.27<br>(14528.67,21159.74)      | 25212.31<br>(18028,32964.68)          | 46496.71<br>(33605.83,62935.72)       | 64785.2<br>(45496.66,87054.32)        | 91427.6<br>(66877.5,122423.56)       | 117067.4<br>(83215.89,156925.77)      | 149845.17<br>(107562.41,203477.92) |

|           |                                              |                                           |                                             |                                              |                                             |                                              |                                              |                                              |
|-----------|----------------------------------------------|-------------------------------------------|---------------------------------------------|----------------------------------------------|---------------------------------------------|----------------------------------------------|----------------------------------------------|----------------------------------------------|
| France    | 113902445.4<br>(82473501.89,15307<br>6467.2) | 5908213.48<br>(4322956.86,768063<br>1.99) | 6581747.31<br>(4727334.89,9073<br>961.48)   | 9033054.2<br>(6542262.78,12077<br>017.12)    | 13091073.32<br>(9306771.65,17815<br>520.07) | 19145022.28<br>(14192871.06,2570<br>2561.88) | 24728794.28<br>(17944602.67,32964<br>277.97) | 35414540.52<br>(25436701.97,477<br>62496.71) |
| Gabon     | 6116.62<br>(4362.63,8325.06)                 | 381.59<br>(271.59,517.32)                 | 454.04<br>(317.35,624.95)                   | 650.6<br>(466.31,879.34)                     | 859.77<br>(607.91,1183.62)                  | 1099.51<br>(790.49,1479.91)                  | 1246.7<br>(890.35,1693.75)                   | 1424.4<br>(1018.64,1946.17)                  |
| Gambia    | 2242.05<br>(1590.95,3056.47)                 | 152.53<br>(110.25,208.08)                 | 182.03<br>(126.16,255.33)                   | 254.28<br>(179.65,349.51)                    | 329.87<br>(233.32,446.63)                   | 424.73<br>(308.19,567.32)                    | 454.91<br>(321.7,616.73)                     | 443.69<br>(311.69,612.86)                    |
| Georgia   | 64631.43<br>(46308.83,87526.76<br>)          | 1935.64<br>(1386.02,2610.22)              | 2233.54<br>(1537.11,3056.39)                | 3843.81<br>(2687.01,5245.99)                 | 7409.86<br>(5245.15,10090.83<br>)           | 11739.54<br>(8537.34,15842.59)               | 15754.1<br>(11366.21,20916.92<br>)           | 21714.94<br>(15549.99,29763.8<br>3)          |
| Germany   | 247951795.1<br>(180268807.6,33072<br>7098.7) | 9044945<br>(6572737.93,121744<br>80.05)   | 12977803.32<br>(9148474.37,1741<br>8117.55) | 20718824.53<br>(15017745.98,2785<br>5792.87) | 32195498.61<br>(22923477.9,42742<br>455.92) | 44006718.34<br>(32821598.62,5791<br>5551.36) | 56548561.64<br>(40934082.43,74773<br>061.07) | 72459443.63<br>(52850690.32,978<br>47639.92) |
| Ghana     | 652299.23<br>(477633.41,865872.<br>39)       | 35864.62<br>(25396.45,48918.77<br>)       | 44262.98<br>(31520.74,59636.9<br>6)         | 61094.28<br>(43895.57,81735.2<br>2)          | 85145.61<br>(61674.86,113280.<br>19)        | 126406.3<br>(94136.66,166055.8<br>9)         | 147966.18<br>(111056.03,192142.<br>08)       | 151559.27<br>(109953.1,204103.<br>27)        |
| Greece    | 1209525.12<br>(868196.11,1635332<br>.66)     | 43450.11<br>(31038.3,59086.72)            | 53782.02<br>(38120.83,71815.1<br>7)         | 79485.82<br>(57234.81,106687.<br>91)         | 119953.22<br>(85046.12,163915.<br>4)        | 201729<br>(148313.57,268315.<br>99)          | 303025.84<br>(217919.93,411067.<br>29)       | 408099.12<br>(290522.55,55444<br>4.17)       |
| Greenland | 73.33 (52.65,99.15)                          | 3.1 (2.24,4.15)                           | 4.33 (3.01,5.98)                            | 8.07 (5.81,10.79)                            | 12.13 (8.57,16.35)                          | 14.75 (10.79,19.47)                          | 14.46 (10.42,19.78)                          | 16.48 (11.8,22.64)                           |
| Grenada   | 29.66 (21.17,40.3)                           | 1.44 (1.03,1.93)                          | 2.12 (1.46,2.93)                            | 3.13 (2.24,4.23)                             | 3.71 (2.63,4.99)                            | 4.49 (3.24,6.03)                             | 5.84 (4.21,7.94)                             | 8.94 (6.36,12.25)                            |
| Guam      | 71.1 (50.67,96.12)                           | 2.81 (1.98,3.77)                          | 3.92 (2.68,5.47)                            | 6.1 (4.36,8.41)                              | 7.76 (5.44,10.39)                           | 11.22 (8.28,14.74)                           | 15.11 (10.73,20.48)                          | 24.19<br>(17.21,32.85)                       |
| Guatemala | 782182.13<br>(561019.1,1053316.<br>8)        | 52738.71<br>(37915.62,70132.77<br>)       | 71713.07<br>(51103.27,97363.0<br>2)         | 98379.52<br>(71345.96,131337.<br>69)         | 114942.8<br>(81712.24,155953.<br>51)        | 133670.11<br>(97432.62,178550.2<br>)         | 152607.48<br>(109281.23,206663.<br>42)       | 158130.44<br>(112228.16,21331<br>6.21)       |
| Guinea    | 66820.94<br>(47809.65,90210.96<br>)          | 140.8<br>(99.23,192.29)                   | 5086.82<br>(3566.27,6941)                   | 7500.24<br>(5282.56,10155.35)                | 10183.4<br>(7214.56,13679.77<br>)           | 12763.49<br>(9340.84,17026.9)                | 13424.3<br>(9569.94,18076.17)                | 13543.26<br>(9792.11,18443.17<br>)           |

|                               |                                              |                                             |                                              |                                              |                                              |                                              |                                              |                                              |
|-------------------------------|----------------------------------------------|---------------------------------------------|----------------------------------------------|----------------------------------------------|----------------------------------------------|----------------------------------------------|----------------------------------------------|----------------------------------------------|
| Guinea-Bissau                 | 2319.6<br>(1635.66,3168.37)                  | 4319.44<br>(3043.37,5888.59)                | 168.48<br>(116.1,232.8)                      | 255.9<br>(180.54,349.41)                     | 354.06<br>(246.87,487.77)                    | 459.79<br>(331.01,613.42)                    | 479.37<br>(337.83,657.06)                    | 461.19<br>(324.07,635.61)                    |
| Guyana                        | 1371.73<br>(975.34,1862.38)                  | 75.21<br>(53.42,101.09)                     | 109.38<br>(75.39,149.84)                     | 160.37<br>(114.1,219.26)                     | 172.02<br>(122.28,236.51)                    | 213.19<br>(154.32,288.39)                    | 285.39<br>(202.87,378.63)                    | 356.17<br>(252.96,488.66)                    |
| Haiti                         | 72882.17<br>(52026.58,99097.26<br>)          | 4371.43<br>(3135.34,5826.28)                | 5275.33<br>(3684.72,7203.51)                 | 7693.81<br>(5471.62,10567.05)                | 10744.44<br>(7648.49,14557.05<br>)           | 13850.01<br>(10042.02,18574.97<br>)          | 15024.71<br>(10729.87,20153.05<br>)          | 15922.44<br>(11314.51,22215.3<br>4)          |
| Honduras                      | 211146.6<br>(150356.07,285633.<br>19)        | 13787.42<br>(9956.59,18901.43)              | 18802.08<br>(13327.5,25687.12<br>)           | 27097.63<br>(19469.61,36334.9<br>9)          | 32418.03<br>(23045,43876.8)                  | 36371.6<br>(26306.58,49051.22<br>)           | 39893.22<br>(28229.47,53189.09<br>)          | 42776.63<br>(30021.33,58592.5<br>3)          |
| Hungary                       | 1714053.59<br>(1244959.5,2272172<br>.6)      | 58345.6<br>(43172.14,76930.47<br>)          | 64284.31<br>(45886.42,87923.6<br>9)          | 101239.64<br>(72386.82,135945.<br>58)        | 158632.91<br>(114809.14,213262<br>.11)       | 252927.14<br>(185700.05,327921.<br>89)       | 440348.63<br>(315500.54,583992.<br>15)       | 638275.36<br>(467504.39,84619<br>6.72)       |
| Iceland                       | 3097.77<br>(2233.23,4160.91)                 | 154.37<br>(112.15,202.9)                    | 193.01<br>(138.18,262.95)                    | 303.33<br>(217.93,405.41)                    | 387.7<br>(278.03,523.3)                      | 512.47<br>(378.84,692.15)                    | 666.19<br>(479.25,890.09)                    | 880.69<br>(628.85,1184.11)                   |
| India                         | 2052937677<br>(1469606168,27449<br>85906)    | 99298867.05<br>(70543957.6,132815<br>070.2) | 126581836.1<br>(88645091.62,171<br>296774.5) | 179302084.2<br>(127228035.8,2439<br>81938.8) | 246098042.1<br>(174362158.7,3343<br>81029.2) | 355911617.5<br>(259332870.3,4684<br>80165.4) | 453208981.3<br>(323152885.4,60287<br>1057.7) | 592536248.9<br>(426341168.6,791<br>159869.9) |
| Indonesia                     | 122626691.6<br>(87866146.89,16480<br>3550.5) | 4274917.66<br>(3052872.19,567493<br>2.81)   | 6438646.35<br>(4683532.57,8803<br>800.97)    | 10362949.17<br>(7471099.24,13883<br>828.13)  | 14829679.02<br>(10538182.46,2015<br>8489.98) | 21472551.89<br>(15912498.93,2849<br>6154.1)  | 28583871.36<br>(20163833.08,38694<br>247.24) | 36664076.15<br>(26044128.4,4909<br>2097.26)  |
| Iran (Islamic<br>Republic of) | 46807393.78<br>(33849634.66,62170<br>643.98) | 2140961.64<br>(1546849.6,2841743<br>.38)    | 2426492.13<br>(1762304.44,3314<br>437.67)    | 3976518.83<br>(2896767.29,53002<br>35.17)    | 7091177.71<br>(5076335.85,94381<br>44.55)    | 10367827.35<br>(7676038.96,13434<br>909.91)  | 10426215.65<br>(7411564.23,139056<br>26.6)   | 10378200.47<br>(7479774.28,1393<br>5546.69)  |
| Iraq                          | 3356978.88<br>(2408855.39,454161<br>1.1)     | 287731.55<br>(209185.84,382902.<br>42)      | 286195.99<br>(202062.46,38995<br>4)          | 378017.98<br>(270603.79,508742<br>.73)       | 479381.28<br>(338534.84,660280<br>.7)        | 547982.13<br>(407753.2,736773.8<br>5)        | 639082.7<br>(460624.46,868553.<br>69)        | 738587.24<br>(520090.82,99440<br>3.72)       |
| Ireland                       | 866536.81<br>(634330.55,1151686)             | 37451.73<br>(28010.69,49489.94)             | 44281.49<br>(31099.2,60203.31)               | 62976.99<br>(45594.66,84381.9)               | 96084.3<br>(70245.21,127970.                 | 157120.48<br>(117112.34,207114.              | 208979.68<br>(151751,274156.75)              | 259642.14<br>(190517.43,34836                |

|              |                                          |                                          |                                         |                                       |                                          |                                         |                                          |                                          |
|--------------|------------------------------------------|------------------------------------------|-----------------------------------------|---------------------------------------|------------------------------------------|-----------------------------------------|------------------------------------------|------------------------------------------|
|              | .11)                                     | )                                        | )                                       |                                       | 34)                                      | 13)                                     |                                          | 9.73)                                    |
| Israel       | 1314649.8<br>(943443.2,1786017.86)       | 82127.9<br>(59923.84,109532.12)          | 90113.4<br>(63301.62,123969.67)         | 118773.61<br>(85236.62,160215.75)     | 156456.65<br>(111477.21,215009.94)       | 222409.92<br>(161947.81,300797.74)      | 279641.03<br>(201558.98,377887.18)       | 365127.3<br>(259997.11,498605.46)        |
| Italy        | 69700176.71<br>(50151133.9,93419800.17)  | 2487754.22<br>(1798634.28,3295509.41)    | 3151231.89<br>(2263849.96,4304285.52)   | 4720698.54<br>(3402313.85,6303620.2)  | 6849098.03<br>(4932242.79,9169782.03)    | 10522895.76<br>(7719515.39,14061834.58) | 16053727.2<br>(11458688.81,21373759.77)  | 25914771.06<br>(18575888.81,34911008.66) |
| Jamaica      | 20778.81<br>(14772.5,28250)              | 993.41<br>(711.55,1345.39)               | 1467.65<br>(1016.96,2013.52)            | 2292.97<br>(1630.59,3108.15)          | 2884.82<br>(2026,3926.02)                | 3717.96<br>(2700.73,4922.11)            | 4122.79<br>(2964.37,5652.84)             | 5299.21<br>(3722.3,7281.97)              |
| Japan        | 536033214.4<br>(388800262.9,707318708.4) | 18542689.51<br>(13512480.37,24259967.08) | 25406592.7<br>(18087494.99,34269814.35) | 37385843<br>(27616803.28,49441630.59) | 53553138.63<br>(38272134.49,71069625.26) | 85354207.4<br>(63615358.85,112314847.7) | 122613853.9<br>(87919344.08,160695230.2) | 193176889.3<br>(139776646.8,255267593.1) |
| Jordan       | 464174.23<br>(332556.37,624384.23)       | 41551.34<br>(29372.89,55758.7)           | 39720.95<br>(28159.22,54353.66)         | 49690.5<br>(35294.37,66513.97)        | 60791.91<br>(42430.35,81531.13)          | 81019.02<br>(58821.68,108251.68)        | 91110.44<br>(65942.03,120780.56)         | 100290.07<br>(72535.84,137194.52)        |
| Kazakhstan   | 1646809.65<br>(1185085.82,2211992.99)    | 63476.12<br>(45127.84,86086.93)          | 63618.87<br>(44232.74,87930.52)         | 117731.62<br>(84500.51,158321.04)     | 215312.69<br>(154040.27,290044.56)       | 303038.02<br>(223326.26,402343.36)      | 379529.7<br>(271338.99,509949.98)        | 504102.64<br>(362519.21,677316.6)        |
| Kenya        | 2284436.41<br>(1643810.84,3054762.87)    | 159573.39<br>(114440.82,212977.2)        | 189068.76<br>(136082.22,255776.51)      | 262094.18<br>(188777.04,353156.97)    | 340672.85<br>(243190.86,458331.15)       | 426336.35<br>(315564.42,560763.79)      | 436093.56<br>(310595.6,586262.08)        | 470597.33<br>(335159.86,627495.17)       |
| Kiribati     | 12.53 (8.88,17.11)                       | 0.63 (0.45,0.85)                         | 0.84 (0.58,1.16)                        | 1.3 (0.93,1.8)                        | 1.7 (1.19,2.35)                          | 2.27 (1.66,3.05)                        | 2.73 (1.94,3.74)                         | 3.05 (2.13,4.16)                         |
| Kuwait       | 387382.37<br>(276776.81,524231.28)       | 12051.95<br>(8661.01,16292.77)           | 15773.7<br>(11143.56,21771.64)          | 31671.71<br>(22396.88,42748.39)       | 60770.24<br>(43245.31,82665.6)           | 88424.15<br>(64018.42,117264.14)        | 89399.78<br>(64313.24,121767.68)         | 89290.83<br>(62998.4,121721.07)          |
| Kyrgyzstan   | 74990.36<br>(53620.21,101851.14)         | 3724.46<br>(2637.22,4995.55)             | 4140.3<br>(2863.42,5674.8)              | 6672.85<br>(4769.28,8961.86)          | 10558.95<br>(7347.04,14374.79)           | 13411.24<br>(9699.34,18173.65)          | 15740.37<br>(11483.67,21291.77)          | 20742.19<br>(14820.23,28378.73)          |
| Lao People's | 32585.18                                 | 1506.98                                  | 2179.44                                 | 3483.95                               | 4695.81                                  | 5967.21                                 | 6728.56                                  | 8023.23                                  |

|                     |                                    |                                |                                 |                                 |                                 |                                  |                                  |                                 |
|---------------------|------------------------------------|--------------------------------|---------------------------------|---------------------------------|---------------------------------|----------------------------------|----------------------------------|---------------------------------|
| Democratic Republic | (22938.58,44250.52 )               | (1062.54,2061.17)              | (1485.18,2983.22)               | (2422.34,4837.32)               | (3270.19,6460.15)               | (4316.81,8024.07)                | (4781.94,8916.13)                | (5599.57,10968.47 )             |
| Latvia              | 38447.73<br>(27709.85,51796.56 )   | 1218.94<br>(885.37,1622.57)    | 1151.03<br>(815.17,1588.07)     | 2194.24<br>(1566.52,2910.78)    | 4391.74<br>(3110.45,5857.85)    | 6658.18<br>(4907.59,8861.57)     | 9002.48<br>(6523.2,12178.53)     | 13831.13<br>(9901.54,18777.18 ) |
| Lebanon             | 217937.46<br>(156860.55,294816.7)  | 10927.47<br>(7739.16,14672.75) | 11141.14<br>(7849.25,15383.9)   | 22881.84<br>(16457.75,30666.35) | 35499.45<br>(25305.98,48058.48) | 42365.34<br>(31452.89,57142.87 ) | 45168.84<br>(32554.21,60548.83 ) | 49953.39<br>(35501.32,68343.53) |
| Lesotho             | 3951.99<br>(2798.04,5381.12)       | 238.6<br>(165.76,327.48)       | 293.87<br>(204.81,401.92)       | 440.85<br>(311.31,596.44)       | 574.74<br>(405.15,791.04)       | 701.85<br>(507.88,932.8)         | 798.07<br>(568.37,1084.5)        | 904<br>(634.76,1246.95)         |
| Liberia             | 15777<br>(11257.27,21436.67 )      | 941.78<br>(662.45,1293.08)     | 1085.43<br>(757.14,1497.61)     | 1545.3<br>(1100.2,2098.4)       | 2022.92<br>(1404.01,2741.54)    | 3083.71<br>(2247.57,4146.13)     | 3448.04<br>(2472.45,4705.55)     | 3649.82<br>(2613.44,4954.36)    |
| Libya               | 286298.12<br>(204417.83,389474.87) | 16785.44<br>(12038.07,22557.1) | 18006.87<br>(12464.71,24726.8 ) | 25563.68<br>(18190.83,34591.94) | 36742.71<br>(25982.31,50753.96) | 53788.71<br>(39879.17,72351.12 ) | 63134.76<br>(45003.59,85039.61 ) | 72275.95<br>(50859.15,99454.34) |
| Lithuania           | 102948.25<br>(73263.28,139089.91)  | 3163.22<br>(2322.26,4160)      | 3973.5<br>(2787.19,5455.4)      | 7006.97<br>(5025.81,9442.29)    | 11252.99<br>(8053.54,15186.92 ) | 16343.99<br>(11884.64,21441.9)   | 23359.75<br>(16686.1,31031.91)   | 37847.83<br>(26503.75,52371.5 ) |
| Luxembourg          | 15340.68<br>(11160.95,20643.84 )   | 581.8<br>(426.63,751.96)       | 783.69<br>(568.42,1058.11)      | 1346.29<br>(972.83,1811.97)     | 1987.36<br>(1439.09,2656.53)    | 2712.59<br>(1991.42,3710.82)     | 3434.51<br>(2509.57,4592.38)     | 4494.45<br>(3252.99,6062.08)    |
| Madagascar          | 188946.83<br>(133350.53,257924.3)  | 13656.34<br>(9592.69,18738.73) | 15435.78<br>(10743.75,21377.67) | 21440.74<br>(15183.24,29146.27) | 27674.23<br>(19436.57,37896.35) | 33601.44<br>(24594.56,45387.43 ) | 36057.89<br>(25531.07,48518.27 ) | 41080.42<br>(28268.65,56859.58) |
| Malawi              | 142333.79<br>(100940.65,194142.73) | 11983.14<br>(8363.73,16261.85) | 12648.86<br>(8799.82,17537.78 ) | 16093.82<br>(11428.21,21800.18) | 21947.86<br>(15444.48,29973.16) | 26544.39<br>(19230.43,36302.94 ) | 26656.11<br>(19124.93,36089.54 ) | 26459.62<br>(18549.04,36177.28) |
| Malaysia            | 3970848.18                         | 154177.75                      | 242029.58                       | 400193.24                       | 554489.39                       | 747053.46                        | 851677.9                         | 1021226.87                      |

|                                        |                                            |                                           |                                           |                                            |                                             |                                              |                                              |                                             |
|----------------------------------------|--------------------------------------------|-------------------------------------------|-------------------------------------------|--------------------------------------------|---------------------------------------------|----------------------------------------------|----------------------------------------------|---------------------------------------------|
|                                        | (2809349.96,541794<br>9.23)                | (108509.37,209734.<br>76)                 | (166472.01,33640<br>6.22)                 | (280378.09,545409<br>.7)                   | (379845.11,759172<br>.83)                   | (541713.09,102803<br>8.09)                   | (608806.81,1165477<br>.01)                   | (723625.48,13737<br>10.62)                  |
| Maldives                               | 1665.63<br>(1175.41,2269.8)                | 48.02 (33.23,66.12)                       | 72.73<br>(51.36,100.49)                   | 148.8<br>(103.91,200.21)                   | 253.14<br>(177.21,354.55)                   | 355.66<br>(256.45,469.24)                    | 377.74<br>(267.18,508.31)                    | 409.56<br>(286.06,570.88)                   |
| Mali                                   | 113526.01<br>(80218.08,154979.5<br>3)      | 8558.5<br>(5938.74,11519.81)              | 9707.63<br>(6644.68,13404.2)              | 13014.09<br>(9206.04,17725.64)             | 16194.06<br>(11214.41,22252.0<br>8)         | 20544.6<br>(14881.17,27494.41<br>)           | 22647.18<br>(16310.6,31198.22)               | 22859.95<br>(16022.43,31385.1<br>8)         |
| Malta                                  | 5123.8<br>(3701.15,6860.58)                | 183.04<br>(131.99,243.26)                 | 249.41<br>(176.73,341.85)                 | 420.6<br>(305.05,569.73)                   | 645.69<br>(459.24,870.19)                   | 896<br>(664.98,1195.48)                      | 1173.29<br>(841.12,1546.81)                  | 1555.77<br>(1122.04,2093.27)                |
| Marshall Islands                       | 5.66 (3.98,7.73)                           | 0.29 (0.2,0.38)                           | 0.37 (0.25,0.51)                          | 0.51 (0.35,0.69)                           | 0.69 (0.48,0.95)                            | 1.02 (0.73,1.38)                             | 1.29 (0.91,1.74)                             | 1.5 (1.05,2.08)                             |
| Mauritania                             | 11194.81<br>(7909.77,15217.39)             | 735.8<br>(527.9,1001.58)                  | 841.8<br>(589.92,1171.76)                 | 1185.53<br>(833.44,1588.3)                 | 1535.12<br>(1074.46,2096.29)                | 2029.32<br>(1451.63,2706.15)                 | 2342.97<br>(1659.2,3181.74)                  | 2524.26<br>(1773.21,3471.57)                |
| Mauritius                              | 8422.98<br>(5946.93,11488.64)              | 270.43<br>(193.6,367.24)                  | 407.75<br>(284.16,558.25)                 | 696.92<br>(492.77,951.72)                  | 928.37<br>(659.55,1247.46)                  | 1353.49<br>(980.64,1815.64)                  | 2135.82<br>(1515.8,2929.59)                  | 2630.2<br>(1820.41,3618.74)                 |
| Mexico                                 | 100930029<br>(72432972.39,13555<br>2008.2) | 4477787.85<br>(3226740.21,592431<br>7.06) | 6573896.54<br>(4640683.59,9052<br>834.17) | 10475103.6<br>(7516486.68,14087<br>805.66) | 14036960.93<br>(9940173.61,18694<br>260.45) | 18096053.55<br>(13323928.52,2398<br>3195.21) | 21299891.83<br>(15304101.43,28576<br>094.33) | 25970334.7<br>(18480858.35,352<br>33501.34) |
| Micronesia<br>(Federated<br>States of) | 4.84 (3.45,6.59)                           | 0.27 (0.2,0.37)                           | 0.35 (0.24,0.48)                          | 0.47 (0.33,0.65)                           | 0.59 (0.41,0.81)                            | 0.79 (0.57,1.06)                             | 1 (0.72,1.36)                                | 1.36 (0.98,1.85)                            |
| Monaco                                 | 19.51 (13.95,26.38)                        | 0.75 (0.53,0.99)                          | 0.94 (0.67,1.29)                          | 1.37 (0.98,1.84)                           | 2.01 (1.41,2.73)                            | 3.07 (2.24,4.16)                             | 4.72 (3.41,6.34)                             | 6.65 (4.71,9.03)                            |
| Mongolia                               | 37059.77<br>(26554.71,49936.51<br>)        | 1398.03<br>(994.29,1887.65)               | 1599.37<br>(1117.41,2226.16)              | 2644.02<br>(1884.48,3523.43)               | 4886.78<br>(3483.85,6658.69)                | 6766.45<br>(4935.71,9000.58)                 | 8528.93<br>(6088.95,11320.94)                | 11236.19<br>(8050.02,15319.06<br>)          |
| Montenegro                             | 4721.17<br>(3417.3,6251.23)                | 207.5<br>(148.77,279.89)                  | 233.25<br>(164.02,320.88)                 | 317.93<br>(225.13,431.92)                  | 488.65<br>(350.53,650.13)                   | 814.87<br>(612.55,1072.82)                   | 1121.47<br>(814.72,1460.58)                  | 1537.5<br>(1101.57,2035.01)                 |
| Morocco                                | 3358224.06<br>(2416574.8,4504677<br>.5)    | 222024.52<br>(159513.87,299918.<br>37)    | 234830.9<br>(163222.22,32264<br>3.85)     | 330661.17<br>(234965.73,439658<br>.08)     | 459855.14<br>(327455.27,619622<br>.82)      | 605629.79<br>(442929.59,804329.<br>08)       | 705485.96<br>(508361.79,945460.<br>59)       | 799736.58<br>(580126.32,10730<br>44.71)     |

|             |                                          |                                      |                                       |                                       |                                       |                                       |                                       |                                       |
|-------------|------------------------------------------|--------------------------------------|---------------------------------------|---------------------------------------|---------------------------------------|---------------------------------------|---------------------------------------|---------------------------------------|
| Mozambique  | 359440.6<br>(255206.21,487779.05)        | 28821.91<br>(20460.05,38465.35)      | 32786<br>(22775.64,45177.88)          | 44163.59<br>(31357.43,59949.27)       | 51436.25<br>(35957.22,69569.4)        | 61880.36<br>(44898.23,82794.55)       | 65666.05<br>(46901.44,89762.61)       | 74686.44<br>(52856.2,102059.9)        |
| Myanmar     | 2106147.41<br>(1492847.26,2876829.51)    | 88558.14<br>(62004.98,121346.72)     | 124618.24<br>(86714.83,172280.54)     | 187674.9<br>(130058.94,256565.09)     | 254376.88<br>(179755.49,357429.13)    | 361942.73<br>(266377.4,478868.42)     | 474502.72<br>(334081.49,655005.6)     | 614473.8<br>(433854.14,835334.02)     |
| Namibia     | 17174.1<br>(12152.96,23449.31)           | 900.75<br>(637.31,1235.28)           | 1116.76<br>(788.72,1558.54)           | 1798.98<br>(1265.81,2438.71)          | 2474.03<br>(1730.08,3384.75)          | 3043.73<br>(2214.16,4118.77)          | 3486.02<br>(2497.61,4727.67)          | 4353.84<br>(3019.26,5985.6)           |
| Nauru       | 0.42 (0.3,0.57)                          | 0.02 (0.02,0.03)                     | 0.03 (0.02,0.04)                      | 0.04 (0.03,0.06)                      | 0.06 (0.04,0.08)                      | 0.08 (0.05,0.1)                       | 0.09 (0.06,0.12)                      | 0.1 (0.07,0.14)                       |
| Nepal       | 1096014.21<br>(791436.26,1464780.86)     | 58926.27<br>(41719.82,79957.57)      | 81759.37<br>(57730.15,111125.23)      | 116505.7<br>(82449.12,154321.9)       | 148942<br>(105165.42,203252.97)       | 189721.35<br>(140810.44,251340.54)    | 225994.36<br>(165842.76,301475.97)    | 274165.16<br>(197718.54,363306.68)    |
| Netherlands | 6385726.12<br>(4564839.08,8652185.97)    | 289599.96<br>(211123.65,381940.15)   | 380945.82<br>(270090.1,522852.11)     | 572022.27<br>(407714.12,769477.84)    | 767358.51<br>(546314.97,1036334.06)   | 1017518.3<br>(740835.92,1351874.78)   | 1338696.39<br>(959925.67,1794577.15)  | 2019584.86<br>(1428834.65,2795129.88) |
| New Zealand | 974915.58<br>(716664.1,1280021.21)       | 38539.95<br>(27798.4,50876.65)       | 62576.91<br>(45044.84,82605.7)        | 101822.12<br>(74233.02,133332.93)     | 137070.15<br>(100372.41,182810.16)    | 167166.12<br>(124545.25,217516.07)    | 197943.62<br>(145551.53,260538.8)     | 269796.72<br>(199118.65,352340.9)     |
| Nicaragua   | 112875.34<br>(80905.11,152946.7)         | 6151.08<br>(4417.31,8301.21)         | 8487.96<br>(5985.95,11694.01)         | 13324.88<br>(9573.51,17931.97)        | 17375.99<br>(12452.32,23484.28)       | 20603.06<br>(15136.47,27596.89)       | 22509.89<br>(16025.47,30458.28)       | 24422.47<br>(17314.09,33480.06)       |
| Niger       | 104371.99<br>(74335.23,142493.02)        | 9009.61<br>(6376.04,12161.56)        | 9493.97<br>(6645.47,13244.73)         | 12057.65<br>(8555.83,16551.94)        | 13649<br>(9568.29,18976.42)           | 17638.21<br>(12844.8,23635.88)        | 20705.07<br>(15051.09,28025.19)       | 21818.48<br>(15293.69,29897.3)        |
| Nigeria     | 28015372.24<br>(20051784.25,37524885.77) | 1993868.65<br>(1424126.97,2694496.2) | 2258739.01<br>(1606588.91,3076191.39) | 3047625.11<br>(2165102.88,4122991.74) | 3786286.93<br>(2692153.82,5071000.43) | 4939434.68<br>(3642859.07,6509652.91) | 5615186.15<br>(4001437.66,7473246.63) | 6374231.71<br>(4519514.93,8577306.46) |
| Niue        | 0.01 (0.01,0.01)                         | 0 (0,0)                              | 0 (0,0)                               | 0 (0,0)                               | 0 (0,0)                               | 0 (0,0)                               | 0 (0,0)                               | 0 (0,0)                               |

|                          |                                          |                                      |                                    |                                       |                                     |                                      |                                        |                                       |
|--------------------------|------------------------------------------|--------------------------------------|------------------------------------|---------------------------------------|-------------------------------------|--------------------------------------|----------------------------------------|---------------------------------------|
| North Macedonia          | 35942.58<br>(25847.03,48374.36)          | 1220.63<br>(873.13,1642.5)           | 1562.09<br>(1108.27,2159.2)        | 2535.72<br>(1811.83,3365.59)          | 4123.01<br>(2944.91,5545.46)        | 6411.26<br>(4641.6,8517.03)          | 8642.88<br>(6237.86,11541.45)          | 11446.99<br>(8229.43,15603.13)        |
| Northern Mariana Islands | 4.36 (3.06,5.98)                         | 0.15 (0.11,0.21)                     | 0.2 (0.14,0.28)                    | 0.26 (0.18,0.35)                      | 0.4 (0.28,0.56)                     | 0.67 (0.49,0.89)                     | 0.69 (0.49,0.94)                       | 1.99 (1.38,2.75)                      |
| Norway                   | 898036.99<br>(648913.32,1199928.04)      | 37294.35<br>(26767.07,49981.9)       | 50080.41<br>(36041.09,67573.75)    | 78781.66<br>(56562.36,104866.28)      | 113351.49<br>(81240.86,151078.73)   | 149673.04<br>(110167.83,201533.57)   | 190107.72<br>(136991.252357.16)        | 278748.32<br>(201143.11,372536.64)    |
| Oman                     | 103711.14<br>(74064.79,139887.39)        | 5590.11<br>(3946.1,7524.29)          | 5947.34<br>(4214.49,8135.94)       | 11003.15<br>(7812.28,14697.49)        | 18061.52<br>(12867.06,23945.31)     | 22148.32<br>(16169.82,29903.72)      | 22195.93<br>(15893.1,29976.41)         | 18764.77<br>(13161.93,25704.23)       |
| Pakistan                 | 38332521.03<br>(26375357.73,52852922.39) | 2027187.66<br>(1392990.98,2796701.5) | 2756954.07<br>(1851930.41,3883806) | 4115858.56<br>(2824288.58,5740656.84) | 5250782.97<br>(3486360.5,7265378.8) | 6810830.24<br>(4815855.6,9301386.85) | 8023001.93<br>(5602544.88,11043775.29) | 9347905.6<br>(6401386.78,12821217.11) |
| Palau                    | 1.98 (1.42,2.67)                         | 0.06 (0.05,0.09)                     | 0.08 (0.05,0.11)                   | 0.11 (0.08,0.14)                      | 0.16 (0.11,0.22)                    | 0.29 (0.21,0.38)                     | 0.49 (0.35,0.65)                       | 0.8 (0.57,1.08)                       |
| Palestine                | 20845.45<br>(14916.32,28217.65)          | 1989.93<br>(1418.59,2678.21)         | 1996.3<br>(1433.25,2705.82)        | 2648.1<br>(1890.1,3554.66)            | 3065.78<br>(2191.6,4209.55)         | 3408.44<br>(2473.33,4550.16)         | 3704.66<br>(2634.26,5020.8)            | 4032.24<br>(2875.2,5498.45)           |
| Panama                   | 196918.52<br>(140898.88,267389.02)       | 10067<br>(7113.85,13572.47)          | 14523.27<br>(10205.88,19685.09)    | 21307.03<br>(15221.07,28806.23)       | 27156.62<br>(19646.88,37256.29)     | 34177.37<br>(24814.23,45562.75)      | 40220.58<br>(28499.86,54674.46)        | 49466.67<br>(35397.1,67831.74)        |
| Papua New Guinea         | 34010.13<br>(24224.06,46020.7)           | 1703.74<br>(1200.53,2290.96)         | 2417.05<br>(1665.06,3312.76)       | 3599.9<br>(2530.14,4911.91)           | 4624<br>(3304.56,6242.95)           | 6036.66<br>(4416.74,8051.98)         | 7173.69<br>(5117.39,9710.26)           | 8455.09<br>(5989.64,11499.89)         |
| Paraguay                 | 232118.84<br>(166278.64,314874.6)        | 14495.17<br>(10367.47,19888.82)      | 17950.93<br>(12869.03,24649.5)     | 25241.56<br>(18082.96,33810.77)       | 33397.45<br>(23452.54,45385.31)     | 42481.44<br>(31029.4,57556.23)       | 46574.29<br>(33640.48,62695.11)        | 51978<br>(36836.75,70888.86)          |
| Peru                     | 2727824.16<br>(1918043.58,373324)        | 129863.23<br>(91702.53,172912.4)     | 180725.79<br>(125571.07,24354)     | 282602.71<br>(198883.9,382492.)       | 375685.54<br>(263598.53,517978)     | 489938.71<br>(349605.18,655443.)     | 579329.73<br>(407311.25,799374.)       | 689678.45<br>(481371.12,96150)        |

|                        |                                              |                                           |                                           |                                           |                                             |                                              |                                              |                                              |
|------------------------|----------------------------------------------|-------------------------------------------|-------------------------------------------|-------------------------------------------|---------------------------------------------|----------------------------------------------|----------------------------------------------|----------------------------------------------|
|                        | 8.74)                                        | 6)                                        | 0.99)                                     | 44)                                       | .7)                                         | 14)                                          | 33)                                          | 6.67)                                        |
| Philippines            | 17531670.85<br>(12546330.34,23500<br>675.29) | 823288.56<br>(590523.5,1099317.<br>39)    | 1166168.87<br>(830462.76,15735<br>72.28)  | 1787246.2<br>(1285395.62,24168<br>45.61)  | 2309147.97<br>(1645672.04,31126<br>94.87)   | 3018303.83<br>(2210827.64,39638<br>79.46)    | 3834525.52<br>(2724608.29,515417<br>1.65)    | 4592989.9<br>(3258840.5,61801<br>94.04)      |
| Poland                 | 25580393.34<br>(18630322.32,33544<br>997.85) | 737023.66<br>(534683.8,967561.0<br>2)     | 962351.77<br>(700218.16,13010<br>34.49)   | 1614014.61<br>(1181110.35,21197<br>13.9)  | 2763919.8<br>(1978711.64,36423<br>80.14)    | 4899385.34<br>(3616803.34,63343<br>83.56)    | 6461101.55<br>(4671677.06,846295<br>1.32)    | 8142596.62<br>(5947117.96,1071<br>6973.42)   |
| Portugal               | 2043179.9<br>(1484533.67,273744<br>6.1)      | 77048.97<br>(57211.6,101228.62<br>)       | 96379.06<br>(68072.76,130091.<br>44)      | 133801.13<br>(94225.96,181165.<br>15)     | 190805.98<br>(138525.56,260040<br>.76)      | 318910.68<br>(234734.31,421519.<br>76)       | 501176.44<br>(361676.48,670162.<br>68)       | 725057.63<br>(530087.01,97323<br>7.7)        |
| Puerto Rico            | 51701.62<br>(36643.05,70847.55<br>)          | 2047.54<br>(1463.9,2742.4)                | 2795.88<br>(1932.22,3843.78)              | 4181.08<br>(2975.59,5801.43)              | 5923.55<br>(4175.13,8119.93)                | 8311.21<br>(6069.65,11106.67)                | 12042.39<br>(8463.8,16498.43)                | 16399.97<br>(11562.76,22734.9<br>1)          |
| Qatar                  | 89343.1<br>(63791.33,120410.4<br>3)          | 3187.38<br>(2319.08,4290.87)              | 3421.14<br>(2391.15,4672.65)              | 8978.63<br>(6415.62,12190.06)             | 17312.66<br>(12260.11,23174.3<br>6)         | 20746.7<br>(15128.7,27778.61)                | 19690.37<br>(14050.44,26519.53<br>)          | 16006.22<br>(11226.23,21784.3<br>6)          |
| Republic of<br>Korea   | 55311055.17<br>(39647752.16,74841<br>554.43) | 1557421.58<br>(1133560.64,207070<br>7.82) | 2737879.04<br>(1946873.91,3714<br>397.19) | 4591095.49<br>(3262092.32,62596<br>31.03) | 5871802.08<br>(4150756.87,80212<br>39.5)    | 8985974.98<br>(6520346.31,11845<br>028.47)   | 13121825.87<br>(9427114.17,175937<br>18.77)  | 18445056.13<br>(13207007.95,253<br>36831.66) |
| Republic of<br>Moldova | 57717.12<br>(41663.79,77360.32<br>)          | 1502.34<br>(1079.61,2034.64)              | 1737.03<br>(1212.65,2379.49)              | 3443.4<br>(2479.81,4632)                  | 6975.97<br>(4953.75,9454.6)                 | 11262.96<br>(8216.47,15025.57)               | 14106.71<br>(10369.13,18865.82<br>)          | 18688.71<br>(13352.37,24968.2<br>)           |
| Romania                | 4865337.76<br>(3523559.56,645638<br>5.58)    | 196322.85<br>(143060.4,261586.6<br>1)     | 198102.48<br>(138798.77,27505<br>7.7)     | 256645.18<br>(183004.62,344800<br>.95)    | 489316.91<br>(348432.32,658553<br>.74)      | 745861.64<br>(557488.98,992908<br>)          | 1228560.61<br>(890190.08,1612622<br>.73)     | 1750528.09<br>(1262584.4,23108<br>55.84)     |
| Russian<br>Federation  | 197339869.8<br>(143081631.1,26177<br>4978.3) | 6111006.94<br>(4399195.75,808752<br>1.1)  | 6187145.05<br>(4418720.51,8406<br>348.88) | 9804463<br>(7051805.1,131404<br>54.73)    | 21732139.93<br>(15647497.4,29119<br>560.27) | 37775736.77<br>(27986649.45,4939<br>7345.85) | 49842681.92<br>(35615723.91,65834<br>337.47) | 65886696.17<br>(47962039.02,877<br>89409.97) |
| Rwanda                 | 101089.36                                    | 6665.89                                   | 7652.82                                   | 10590.49                                  | 15225.36                                    | 19870.68                                     | 20115.08                                     | 20969.04                                     |

|                                  |                                          |                                     |                                     |                                       |                                     |                                       |                                      |                                      |
|----------------------------------|------------------------------------------|-------------------------------------|-------------------------------------|---------------------------------------|-------------------------------------|---------------------------------------|--------------------------------------|--------------------------------------|
|                                  | (71800.93,137259.34)                     | (4725.14,8877.02)                   | (5297.28,10560.54)                  | (7443.14,14257.17)                    | (10697.55,20680.7)                  | (14506.57,26424.27)                   | (14210.04,27558.85)                  | (14921.22,28900.79)                  |
| Saint Kitts and Nevis            | 17.48 (12.47,23.71)                      | 0.71 (0.5,0.93)                     | 0.98 (0.69,1.36)                    | 1.52 (1.07,2.1)                       | 2.22 (1.55,3.04)                    | 3.07 (2.21,4.06)                      | 3.83 (2.76,5.13)                     | 5.15 (3.69,7.08)                     |
| Saint Lucia                      | 90.69<br>(64.48,123.03)                  | 3.47 (2.45,4.76)                    | 4.92 (3.38,6.79)                    | 7.99 (5.71,10.78)                     | 10.62 (7.46,14.69)                  | 15.41 (10.97,20.8)                    | 20.23 (14.6,27.08)                   | 28.05 (19.9,38.14)                   |
| Saint Vincent and the Grenadines | 27.57 (19.63,37.74)                      | 1.29 (0.91,1.74)                    | 1.68 (1.17,2.31)                    | 2.46 (1.73,3.42)                      | 3.21 (2.26,4.47)                    | 4.71 (3.45,6.36)                      | 6.24 (4.47,8.55)                     | 7.97 (5.64,10.89)                    |
| Samoa                            | 44.05 (31.15,60.03)                      | 2.69 (1.89,3.63)                    | 3.22 (2.19,4.48)                    | 4.49 (3.19,6.06)                      | 5.92 (4.15,7.81)                    | 7.39 (5.4,9.96)                       | 8.75 (6.23,12.02)                    | 11.6 (8.1,16.08)                     |
| San Marino                       | 21.19 (15.12,28.9)                       | 0.82 (0.58,1.11)                    | 1.04 (0.74,1.4)                     | 1.47 (1.05,2)                         | 1.97 (1.38,2.62)                    | 3.03 (2.2,4.13)                       | 4.88 (3.49,6.66)                     | 7.99 (5.68,10.98)                    |
| Sao Tome and Principe            | 34.85 (24.8,47.56)                       | 2.04 (1.43,2.79)                    | 2.32 (1.62,3.28)                    | 3.29 (2.3,4.47)                       | 4.69 (3.31,6.5)                     | 6.55 (4.72,8.73)                      | 7.67 (5.5,10.46)                     | 8.3 (5.92,11.33)                     |
| Saudi Arabia                     | 21936737.76<br>(15607814.01,29647862.67) | 986386.76<br>(696400.16,1327329.38) | 1279539.56<br>(891262.97,174810.64) | 2157993.66<br>(1544753.68,2920487.55) | 3401162.9<br>(2414719.5,4607610.06) | 4594524.01<br>(3331316.55,6122981.62) | 4805303.8<br>(3427128.53,6531778.22) | 4711827.06<br>(3302232.62,6389565.2) |
| Senegal                          | 105648.11<br>(74813.79,143987.74)        | 6485.12<br>(4574.39,8875.83)        | 7747.79<br>(5327.38,10648.04)       | 11292.59<br>(7870.73,15285.84)        | 15097.2<br>(10659.59,20943.07)      | 19495.42<br>(14183.3,26476.58)        | 21809.92<br>(15413.84,29429.32)      | 23720.06<br>(16784.56,32329.05)      |
| Serbia                           | 713627.9<br>(513799.16,957666.82)        | 30863.96<br>(21964.4,41492.78)      | 32936.1<br>(23554.26,44621.39)      | 48436.96<br>(35173.45,65038.1)        | 76118.92<br>(54371.34,101417.44)    | 122342.24<br>(89070.18,164289.93)     | 171423.97<br>(123249.47,231562.37)   | 231505.76<br>(166416.07,309244.82)   |
| Seychelles                       | 57.84 (40.78,78.72)                      | 1.87 (1.31,2.58)                    | 2.59 (1.78,3.54)                    | 4.43 (3.06,6.06)                      | 6.48 (4.47,8.98)                    | 9.67 (7.01,12.94)                     | 13.6 (9.63,18.44)                    | 19.2 (13.51,26.18)                   |
| Sierra Leone                     | 56529.77<br>(40201.55,76971.01)          | 3727.75<br>(2633.02,5114.5)         | 4651.23<br>(3232.27,6443.15)        | 6561.5<br>(4638.89,8922.13)           | 8453.15<br>(5856.73,11470.85)       | 10246.67<br>(7466.18,13729.92)        | 11612.09<br>(8359.09,15645.39)       | 11277.38<br>(8015.37,15645.08)       |
| Singapore                        | 1131763.17<br>(814635.63,1532819.3)      | 24498.83<br>(17617.57,32712.64)     | 39007.51<br>(27519.68,53140.38)     | 91264.46<br>(65534.63,125539.1)       | 151540.93<br>(107217.97,204363.81)  | 214781.07<br>(154972.36,288927.01)    | 317498.64<br>(228231.48,427550.34)   | 293171.73<br>(213541.93,400586.02)   |

|                 |                                         |                                      |                                       |                                       |                                       |                                       |                                       |                                         |
|-----------------|-----------------------------------------|--------------------------------------|---------------------------------------|---------------------------------------|---------------------------------------|---------------------------------------|---------------------------------------|-----------------------------------------|
| Slovakia        | 566734.88<br>(407558.26,755493.14)      | 18572.67<br>(13672.52,24630.34)      | 21351.55<br>(15182.45,29237.32)       | 34812.58<br>(24797.82,46753.37)       | 60660.62<br>(42952.94,80392.52)       | 99426.16<br>(72413.54,130898.86)      | 142076.46<br>(101836.89,192068.24)    | 189834.84<br>(136702.11,251512.49)      |
| Slovenia        | 87272.52<br>(63306.9,116574.32)         | 2745.06<br>(1971.98,3660.96)         | 3205.88<br>(2283.58,4425.52)          | 4911.99<br>(3507.79,6624.27)          | 8869.17<br>(6367.85,12078.51)         | 15027.12<br>(11184.31,19605.41)       | 22281.27<br>(16107.58,29615.02)       | 30232.05<br>(21883.81,40564.62)         |
| Solomon Islands | 183.76<br>(131.06,249.55)               | 10.36 (7.41,13.93)                   | 13.19 (9.45,18.25)                    | 18.06 (12.91,24.62)                   | 23.32<br>(16.55,31.26)                | 31.73 (22.82,42.88)                   | 39.39 (27.65,53.56)                   | 47.71<br>(34.27,65.05)                  |
| Somalia         | 29973.91<br>(21405.46,40634.17)         | 2368.4<br>(1682.84,3253)             | 2558.73<br>(1775.75,3491.98)          | 3285.42<br>(2344.02,4400.65)          | 3963.19<br>(2839.06,5391.8)           | 5362.46<br>(3923.36,7258.19)          | 6323.7<br>(4508.37,8570.69)           | 6112.02<br>(4332.07,8267.86)            |
| South Africa    | 12688968.83<br>(9070179.85,17060875.65) | 485716.94<br>(348919.43,653895.76)   | 635877.14<br>(451087.64,877580.04)    | 1170805.9<br>(832206.39,1569063.91)   | 1812392.01<br>(1281612.93,2416490.32) | 2436984.75<br>(1770533.85,3241861.34) | 2693282.23<br>(1936793.88,3632695.73) | 3453909.86<br>(2449025.73,4669288.55)   |
| South Sudan     | 28208.67<br>(20001.99,38604.74)         | 2163.72<br>(1516.31,2921.34)         | 2182.7<br>(1514.87,2996.16)           | 2311.16<br>(1650.33,3161.01)          | 3794.75<br>(2688.03,5145.52)          | 5296.26<br>(3859.19,7212.44)          | 5941.24<br>(4195.73,8216.07)          | 6518.84<br>(4577.54,8952.18)            |
| Spain           | 36236643<br>(25766828.63,50009937.58)   | 1385497.37<br>(984165.86,1850427.72) | 1513705.84<br>(1050967.52,2048676.95) | 2265951.86<br>(1643789.05,3116674.24) | 3342919.78<br>(2353889.33,4637837.99) | 5629924.72<br>(4019403.57,7732343.42) | 9204027.06<br>(6586377.65,1262210.08) | 12894616.38<br>(9128235.66,18001867.18) |
| Sri Lanka       | 837772.89<br>(589282.07,1136998.61)     | 31034.17<br>(22130.44,41717.05)      | 41173.02<br>(28662.77,57387.36)       | 67659.45<br>(47588.08,91798.26)       | 95020.96<br>(66758.41,130610.75)      | 147639.51<br>(106467.81,194356.12)    | 202289.44<br>(141210.09,273490.3)     | 252956.35<br>(176464.46,347638.77)      |
| Sudan           | 1872040.43<br>(1347772.88,2525064)      | 180107.37<br>(131691.91,243417.5)    | 173442.63<br>(125130.3,236250.41)     | 221710.71<br>(157489.13,304072.11)    | 277704.47<br>(201440.61,366624.59)    | 338078.07<br>(247718.11,454314.98)    | 345422.33<br>(246775.95,464435.42)    | 335574.86<br>(237526.88,455948.99)      |
| Suriname        | 1549.05<br>(1105.32,2104.36)            | 74.98 (53.3,101.52)                  | 98.07<br>(67.66,134.09)               | 138.89<br>(97.37,189.92)              | 197.05<br>(140.96,271.09)             | 270.48<br>(196.87,360.71)             | 327.28<br>(235.75,442.19)             | 442.29<br>(313.42,604.84)               |
| Sweden          | 2106491.39                              | 92219.36                             | 104828.38                             | 182159.55                             | 276474.28                             | 350888.32                             | 450677.61                             | 649243.89                               |

|                                  |                                             |                                        |                                        |                                        |                                          |                                           |                                           |                                           |
|----------------------------------|---------------------------------------------|----------------------------------------|----------------------------------------|----------------------------------------|------------------------------------------|-------------------------------------------|-------------------------------------------|-------------------------------------------|
|                                  | (1457570.02,294475<br>7.72)                 | (62425.66,128372.2<br>9)               | (70571.45,148278.<br>95)               | (126700.72,250929<br>.24)              | (188648.36,384436<br>.76)                | (248454.66,482847.<br>54)                 | (311389.82,638456.<br>72)                 | (449379.35,91143<br>6.22)                 |
| Switzerland                      | 3241493.63<br>(2318229.08,438342<br>0.85)   | 115035.97<br>(83631.91,149453.7<br>)   | 157813.28<br>(110313.25,21578<br>6.88) | 272917.4<br>(196395.18,370655<br>.07)  | 409908.69<br>(289844.76,563445<br>.5)    | 575571.93<br>(424115.93,769016.<br>83)    | 734227.18<br>(526105.18,992999.<br>24)    | 976019.18<br>(687822.87,13220<br>63.64)   |
| Syrian Arab<br>Republic          | 1029690.48<br>(738814.71,1388228<br>.49)    | 100097.32<br>(71170.47,135682.4<br>9)  | 90803.58<br>(62842.58,124955.<br>45)   | 53748.35<br>(38368.73,72696.5<br>6)    | 85941.69<br>(61593.92,118207.<br>04)     | 191472.54<br>(141323.56,254429.<br>98)    | 231060.66<br>(166905.37,307705.<br>58)    | 276566.34<br>(196610.08,37455<br>1.38)    |
| Taiwan<br>(Province of<br>China) | 6528001.1<br>(6065520.42,699225<br>7.58)    | 122016.46<br>(112123.84,131164.<br>26) | 258678.67<br>(241476.05,27663<br>3.75) | 492788.55<br>(454874.89,526246<br>.87) | 669588.19<br>(619390.48,714591<br>.34)   | 1122086.27<br>(1054120.97,12011<br>90.74) | 1679466.32<br>(1544779.87,179610<br>9.78) | 2183376.63<br>(2038754.33,2346<br>320.85) |
| Tajikistan                       | 100616.63<br>(72262.5,136534.16<br>)        | 5552.97<br>(4030.99,7476.19)           | 6271.66<br>(4423.79,8658.34)           | 9341.34<br>(6710.64,12591)             | 14749.31<br>(10529.64,20128.9<br>8)      | 18680.08<br>(13553.68,25086.46<br>)       | 20411.79<br>(14829.18,27363.88<br>)       | 25609.48<br>(18184.59,35229.2<br>9)       |
| Thailand                         | 12128465.92<br>(8629275.98,165568<br>28.82) | 298054.51<br>(208996.9,405248.4<br>2)  | 478180.27<br>(334144.77,66020<br>5.9)  | 819986.8<br>(571407.85,110838<br>5.23) | 1132075.25<br>(801884.52,152243<br>3.26) | 1979789.04<br>(1426099.62,26757<br>80.17) | 2961188.38<br>(2123856.46,405658<br>2.28) | 4459191.68<br>(3162885.86,6128<br>193.56) |
| Timor-Leste                      | 854.7<br>(602.43,1172.82)                   | 59.35 (41.98,81.43)                    | 77.23<br>(53.34,106.95)                | 101.03<br>(69.58,139.42)               | 114.45<br>(80.09,155.66)                 | 132.03<br>(97.32,180.82)                  | 160.96<br>(114.23,219.1)                  | 209.65<br>(145.9,289.44)                  |
| Togo                             | 22439.47<br>(15817.58,30558.74<br>)         | 1171.84<br>(825.77,1593.72)            | 1409.59<br>(980.03,1951.48)            | 2140.32<br>(1496.02,2897.51)           | 3167.01<br>(2245.04,4364.85)             | 4384.15<br>(3149.04,5891.33)              | 4898.48<br>(3467.92,6625.48)              | 5268.06<br>(3653.77,7234.37)              |
| Tokelau                          | 0.02 (0.01,0.02)                            | 0 (0,0)                                | 0 (0,0)                                | 0 (0,0)                                | 0 (0,0)                                  | 0 (0,0)                                   | 0 (0,0.01)                                | 0.01 (0,0.01)                             |
| Tonga                            | 10.05 (7.16,13.72)                          | 0.57 (0.4,0.77)                        | 0.7 (0.49,0.97)                        | 0.94 (0.66,1.28)                       | 1.2 (0.87,1.64)                          | 1.72 (1.25,2.32)                          | 2.15 (1.53,2.88)                          | 2.77 (1.96,3.84)                          |
| Trinidad and<br>Tobago           | 12649.69<br>(8978.63,17254.6)               | 489.52 (348,657.85)                    | 601.7<br>(421.05,828.13)               | 989.15<br>(696.56,1344.87)             | 1635.05<br>(1143.62,2243.36)             | 2564.91<br>(1854.61,3477.07)              | 2907.85<br>(2067.14,4007.88)              | 3461.51<br>(2447.65,4695.45)              |
| Tunisia                          | 673436.7<br>(483199.55,907437.<br>39)       | 34151.35<br>(24548.82,45674.76<br>)    | 36631.94<br>(26158.64,50090.1<br>2)    | 57959.65<br>(41519.31,78605.0<br>6)    | 90584.49<br>(64286.25,123226.<br>61)     | 130635.87<br>(96627.4,172341.28<br>)      | 155091.36<br>(111825.02,207929.<br>89)    | 168382.03<br>(118234.12,22956<br>9.67)    |

|                              |                                          |                                          |                                          |                                          |                                         |                                         |                                          |                                          |
|------------------------------|------------------------------------------|------------------------------------------|------------------------------------------|------------------------------------------|-----------------------------------------|-----------------------------------------|------------------------------------------|------------------------------------------|
| Turkmenistan                 | 135197.91<br>(96860.94,183561.81)        | 2411493.14<br>(1752185.33,3198899.31)    | 7477.69<br>(5224.71,10340.09)            | 11056.77<br>(7902.98,15054.33)           | 16743.92<br>(11762.46,23127.46)         | 23404.53<br>(17289.27,31325.71)         | 29802.26<br>(21538.13,39766.16)          | 39718.16<br>(28114.74,54559.17)          |
| Tuvalu                       | 0.37 (0.26,0.5)                          | 6994.57<br>(5028.65,9388.88)             | 0.03 (0.02,0.04)                         | 0.04 (0.03,0.05)                         | 0.05 (0.03,0.06)                        | 0.06 (0.05,0.08)                        | 0.08 (0.05,0.1)                          | 0.1 (0.07,0.14)                          |
| Türkiye                      | 43098602.75<br>(30861575.43,58527818.12) | 0.02 (0.01,0.03)                         | 2794464.58<br>(2004436.78,3778789.98)    | 3859820.58<br>(2780031.51,5249732.92)    | 5406232.24<br>(3833285.5,7341790.44)    | 7642718.38<br>(5576791.56,10167920.09)  | 9759414.23<br>(6931315.26,13227041.22)   | 11224459.6<br>(7983529.48,15563644.16)   |
| Uganda                       | 759999.16<br>(538576.23,1035166.43)      | 63654.84<br>(44161.43,87606.26)          | 69631.64<br>(47937.21,96998.73)          | 94070.49<br>(67163.33,127844.35)         | 117701.87<br>(83047.01,160997.83)       | 132445.28<br>(97649.56,177543.33)       | 134792.08<br>(95601.3,182541.54)         | 147702.97<br>(103016.38,201634.38)       |
| Ukraine                      | 12601461.57<br>(9087748.65,16817954.2)   | 342179.68<br>(243830.47,461097.91)       | 377093.91<br>(269183.95,508510.65)       | 699869.68<br>(504587.64,947413)          | 1388864.64<br>(993068.68,1891873.59)    | 2440046.73<br>(1802156.45,3177433.67)   | 3114909.84<br>(2242584.9,4134477.48)     | 4238497.09<br>(3032336.56,5697147.91)    |
| United Arab Emirates         | 1069406.97<br>(764269.6,1447078.5)       | 36818.34<br>(25988.65,49005.71)          | 38009.34<br>(26330.2,52416.14)           | 42323.78<br>(30201.02,56745.07)          | 87213.78<br>(61992.99,119667.56)        | 298183.13<br>(218944.85,400925.36)      | 334177.16<br>(237950.17,447786.81)       | 232681.44<br>(162861.73,320531.83)       |
| United Kingdom               | 121616939.8<br>(87834731.08,161699853.4) | 4969122.11<br>(3603307.49,6568757.83)    | 6823046.69<br>(4877759.47,9173246.99)    | 10872024.07<br>(7904186.92,14535310.66)  | 15697840.27<br>(11240659.45,2091844.73) | 21187176.56<br>(15602651.83,27970064.7) | 26169834.27<br>(18799424.27,34745924.55) | 35897895.79<br>(25806741.65,47794703.96) |
| United Republic of Tanzania  | 1186137.86<br>(842824.27,1615596.37)     | 84280.65<br>(58220.69,116496.06)         | 96188.24<br>(67241.11,131953.1)          | 135119.96<br>(96069.79,182623.44)        | 173627.53<br>(121416.13,239011.41)      | 211785.25<br>(153590.35,288720.51)      | 228694.59<br>(162403.38,304674.04)       | 256441.63<br>(183882.81,352117.82)       |
| United States of America     | 7163886426<br>(5881237600,8645956876)    | 297487897.7<br>(241256145.1,362431069.6) | 383660730.6<br>(313501136.4,466903647.4) | 657391459.3<br>(537998196.2,794161465.8) | 1003067272<br>(821587160.6,1218495940)  | 1320361544<br>(1092066299,1574320551)   | 1568167829<br>(1296701180,1881478647)    | 1933749693<br>(1578127482,2348165555)    |
| United States Virgin Islands | 19.91 (14.07,27.13)                      | 0.78 (0.55,1.06)                         | 0.89 (0.61,1.22)                         | 1.51 (1.07,2.05)                         | 2.21 (1.54,3)                           | 3.31 (2.4,4.46)                         | 4.55 (3.26,6.14)                         | 6.66 (4.64,9.21)                         |
| Uruguay                      | 157097.85                                | 6790.35                                  | 9630.72                                  | 14210.81                                 | 19073.66                                | 27526.65                                | 35780.42                                 | 44085.24                                 |

|                                          |                                          |                                    |                                     |                                      |                                     |                                       |                                       |                                       |
|------------------------------------------|------------------------------------------|------------------------------------|-------------------------------------|--------------------------------------|-------------------------------------|---------------------------------------|---------------------------------------|---------------------------------------|
|                                          | (113239.91,209347.36)                    | (4855.22,8956.04)                  | (6862.68,13111.27)                  | (10080.81,18931.37)                  | (13859.04,25572.27)                 | (20431.32,36132.68)                   | (25693,47163.04)                      | (31457.84,59480.7)                    |
| Uzbekistan                               | 2137953.69<br>(1528246.19,2891691.68)    | 89284.25<br>(63447.87,122881.12)   | 103780.81<br>(71932.74,143200.42)   | 174442.73<br>(123954.74,233122.52)   | 284535.19<br>(198574,390006.08)     | 400432.06<br>(297036.61,535747.46)    | 479573.15<br>(343205.47,640107.55)    | 605905.5<br>(430094.77,826626.53)     |
| Vanuatu                                  | 37.61 (26.74,51.07)                      | 2.08 (1.47,2.8)                    | 2.84 (1.99,3.93)                    | 4.02 (2.84,5.42)                     | 4.91 (3.44,6.76)                    | 6.44 (4.69,8.64)                      | 7.76 (5.52,10.58)                     | 9.57 (6.8,12.94)                      |
| Venezuela<br>(Bolivarian<br>Republic of) | 729353.27<br>(520868.61,990245.05)       | 33762.52<br>(24321.27,44758.98)    | 35988.37<br>(24909.16,49240.92)     | 62706.57<br>(44289.48,84665.22)      | 104522.31<br>(73170.14,144226.82)   | 134047.26<br>(96814.13,178977.44)     | 167408.24<br>(121826.41,224090.41)    | 190918<br>(135538,264285.26)          |
| Viet Nam                                 | 17992692.85<br>(12684362.24,24466189.98) | 532058.84<br>(368827.97,730249.23) | 740197.27<br>(507763.04,1020644.74) | 1493483.97<br>(1043495.3,2038653.33) | 2430372.06<br>(1677399.2,3316873.7) | 3402710.21<br>(2467790.03,4526694.51) | 4116661.06<br>(2901995.97,5673777.84) | 5277209.45<br>(3717090.75,7159296.63) |
| Yemen                                    | 486998.91<br>(349014.73,658577.79)       | 49419.9<br>(35431.82,66246.24)     | 43023.05<br>(29833.8,59138.26)      | 54342.29<br>(38561.74,73122.12)      | 74559.31<br>(52823.29,100614.05)    | 91769.89<br>(67546.55,123541.94)      | 90776.61<br>(65149.42,121283.85)      | 83107.85<br>(59668.1,114631.33)       |
| Zambia                                   | 227359.01<br>(161693.33,309587.54)       | 16948.14<br>(11984.3,23150.36)     | 19559.43<br>(13747.29,26529.74)     | 27866.25<br>(19803.37,37976.42)      | 35713.23<br>(25478.66,49087.2)      | 41706.19<br>(30286.34,55845.79)       | 42098.86<br>(29738.24,56951.41)       | 43466.91<br>(30655.14,60046.62)       |
| Zimbabwe                                 | 160784.67<br>(114700.49,219279.19)       | 10056.17<br>(7150.88,13649.3)      | 11710.99<br>(8094.23,15904.1)       | 16586.04<br>(11722.49,22325.8)       | 22404.07<br>(15758.06,31078.44)     | 29565.78<br>(21686.34,40018.24)       | 33099.34<br>(23827.13,45333.78)       | 37362.27<br>(26461.36,50969.53)       |
